# Supplementary material for: Disruption of the novel nested gene Aff3ir mediates disturbed flow-induced atherosclerosis in mice
Source: eLife. 2025 May 2;13:RP103413. doi: 10.7554/eLife.103413 (PMC12048156; doi:10.7554/eLife.103413)
Supplement: Figure 1—figure supplement 1—source data 1. [file elife-103413-fig1-figsupp1-data1.xlsx]

## Sheet: Extended F1.B
	TA							AA
ORF2	1.02761	0.832127	1.02974	1.52195	0.835773	0.7528		0.789809	0.525476	0.826439	1.03203	0.885333	0.943818
AFF3	1.09762	1.2381	1.09493	1.16167	0.652193	0.755482		1.09491	0.566102	0.757673	0.459043	0.959348	0.482055
ORF1	1.09035	1.10876	1.0886	0.711376	1.01464	0.986269		0.917307	0.977175	0.985743	0.755549	0.826728	0.75734
