# Supplementary material for: Disruption of the novel nested gene Aff3ir mediates disturbed flow-induced atherosclerosis in mice
Source: eLife. 2025 May 2;13:RP103413. doi: 10.7554/eLife.103413 (PMC12048156; doi:10.7554/eLife.103413)
Supplement: Figure 1—source data 1. [file elife-103413-fig1-data1.xlsx]

## Sheet: 1.A
AFF3ir-ORF2
TA	AA
1.28916	0.527202
1.18627	0.509243
0.983793	0.44026
0.827268	0.580926
0.868397	0.516352
0.844651	0.576914
AFF3
TA	AA
0.864347	0.94585
0.901052	0.74726
0.706951	1.14051
1.4842	0.795362
0.619718	1.23087
1.42374	0.82341

## Sheet: 1.C
	TA							AA
ORF2	0.338553	0.743177	0.458302	1.59918	1.87605	0.984737		0.110244	0.09762	0.134665	0.110063	0.12405	0.181473
AFF3	1.28496	0.804725	1.04327	0.47605	1.00824	1.38276		0.997581	0.822782	0.89453	0.896118	1.30339	1.28236
ORF1	1.08137	1.44299	0.96825	1.1478	0.845908	0.513685		0.945865	1.28151	1.41664	1.10977	1.02751	0.840679

## Sheet: 1.E
TA	AA(outer)	AA
0.982972	0.515706	0.189644
1.00433	0.65204	0.278249
1.00235	0.775762	0.137113
0.995919	0.556809	0.136757
1.02457	0.413881	0.200083
0.989861	0.580529	0.287097

## Sheet: 1.H
	ST	OSS 6h	OSS 12h
AFF3ir-ORF2	0.997795	0.47335	0.483761
	1.06463	0.386871	0.34868
	1.06223	0.644242	0.378821
	1.00494	0.490782	0.465249
	0.82364	0.510806	0.474764
	1.04676	0.438631	0.41628
AFF3	1.24993	0.735591	0.744356
	1.05766	0.938053	1.08633
	0.939144	0.977882	0.907558
	0.731066	1.05064	0.980327
	1.12976	0.8564	0.90043
	0.892441	1.13091	1.12895
ICAM-1	0.976635	2.32654	1.94376
	1.53653	2.66713	1.85546
	0.877707	1.36402	1.85727
	0.805875	1.77294	1.68164
	0.794079	1.68759	2.26426
	1.00917	1.77615	2.07484

## Sheet: 1.I
	ST	OSS 6h
AFF3ir	0.96956	0.27651
	0.87382	1.11374
	1.66487	0.30049
	0.84992	0.10923
	1.32446	0.10923
	0.31763	0.28626
AFF3	0.80928	0.6528
	0.78172	1.12095
	0.64829	0.86737
	1.32383	0.79263
	1.24377	0.6007
	1.1931	0.60488
ICAM-1	1.51438	2.2326
	1.27343	8.80744
	1.6687	2.40948
	0.510055	1.87738
	0.581852	4.71979
	0.453358	4.75262
VCAM-1	0.3151	20.8253
	1.62888	33.597
	1.36026	26.5431
	0.20503	15.7826
	1.81993	16.6825
	0.67076	20.6814
