# Supplementary material for: Disruption of the novel nested gene Aff3ir mediates disturbed flow-induced atherosclerosis in mice
Source: eLife. 2025 May 2;13:RP103413. doi: 10.7554/eLife.103413 (PMC12048156; doi:10.7554/eLife.103413)
Supplement: Figure 2—figure supplement 1—source data 1. [file elife-103413-fig2-figsupp1-data1.xlsx]

## Sheet: Extended 2.A
		Ad-Scramble							Ad-AFF3ir-ORF2
AFF3	ST	0.867088	0.955449	0.843377	0.436559	1.6293	1.26949		2.83677	1.8977	1.18448	1.09752	1.68676	1.68676
	OSS	2.6468	1.82039	1.3892	1.97829	0.935786	1.56293		0.935786	3.71729	1.50969	2.62852	1.61804	1.20101
ICAM-1	ST	0.738304	1.15852	1.14257	0.871932	1.34937	0.738304		2.58881	3.71223	1.38731	5.70524	3.29959	5.28641
	OSS	27.7091	96.4886	33.4118	8.70767	25.8535	68.2278		1.9484	17.295	4.17648	10.0721	6.97545	5.54923
VCAM-1	ST	0.854789	0.515356	2.17896	0.245474	1.61736	0.591989		0.144951	0.302214	0.257678	0.300126	0.759773	0.552345
	OSS	3.90045	13.0289	10.5827	4.12285	11.824	5.79031		0.094316	2.19412	2.24022	0.608632	2.019	0.21668
IL-1β	ST	0.489699	0.615559	1.72904	0.301445	1.6586	1.20578		0.045122	0.641699	0.376303	0.411786	1.02809	0.395012
	OSS	0.933013	5.38882	3.2265	2.37836	1.3379	1.53684		0.049035	0.24485	0.085376	0.196142	0.086567	0.062067
IL-6	ST	0.531222	1.29001	1.5235	0.577298	1.22043	0.857012		0.452939	1.01917	0.924912	0.893406	0.214253	0.324747
	OSS	2.01027	12.4441	2.34143	8.7993	3.75129	3.22073		0.070677	0.488824	1.79924	1.06984	0.87502	0.422607

## Sheet: Extended 2.B
		Ad-Scramble							Ad-AFF3ir-ORF2
AFF3	ST	0.772584	0.875248	0.944592	0.906113	1.25507	1.2464		0.663314	0.159073	0.640719	1.01943	0.893639	0.893639
	OSS	0.492352	0.542526	0.746267	0.925153	0.96444	0.772584		0.618894	0.875248	0.623198	0.593682	1.14692	0.810994
ICAM-1	ST	0.46158	0.626181	1.14445	1.38958	1.19305	1.18481		2.62925	6.51901	6.21025	4.30094	5.33191	3.56685
	OSS	33.0059	46.0348	11.9974	22.2333	21.476	22.388		7.38528	18.1847	9.47846	7.13371	7.23329	11.9974
VCAM-1	ST	0.739235	0.781385	1.0823	2.33611	0.739235	0.321771		0.552523	2.43531	1.29604	0.719021	1.62913	1.79515
	OSS	3.95617	5.83247	6.84052	1.72202	10.3683	3.66574		0.719021	0.891376	1.12827	1.29604	1.43804	1.79515
IL-1β	ST	0.787805	0.949941	1.25345	1.78498	0.538087	0.685824		0.286362	2.96064	2.40479	3.77352	3.19521	2.80094
	OSS	5.79943	4.4565	4.07249	4.80958	1.9264	5.15478		0.724928	0.969901	2.00821	3.40089	1.72418	1.38119
IL-6	ST	1.07669	1.06926	0.658204	0.963667	0.918025	1.31641		0.930841	0.963667	0.686155	1.00459	2.00918	1.48104
	OSS	5.26563	4.10279	4.42785	4.21814	2.63281	3.93566		0.471917	1.17822	3.82804	1.78584	2.96207	2.16836

## Sheet: Extended 2.D
Ad-Scramble	Ad-AFF3ir-ORF2
2.09867	2.97814
0.336821	3.253
0.31387	3.32448
1.96114	3.49376
0.32657	4.73109
0.962928	3.93771
