# Supplementary material for: Disruption of the novel nested gene Aff3ir mediates disturbed flow-induced atherosclerosis in mice
Source: eLife. 2025 May 2;13:RP103413. doi: 10.7554/eLife.103413 (PMC12048156; doi:10.7554/eLife.103413)
Supplement: Figure 2—source data 1. [file elife-103413-fig2-data1.xlsx]

## Sheet: 2.B
		Ad-Scramble							Ad-AFF3ir-ORF2
AFF3	ST	0.880822	1.06572	1.02353	1.1631	0.97139	0.895438		1.39962	1.91859	1.16952	0.498005	1.10894	1.51771
	OSS	1.01782	0.875745	0.254941	0.341608	0.5787	1.04463		1.0497	0.87915	0.61003	0.397659	1.23808	1.22754
ICAM-1	ST	0.770864	0.907488	1.20541	1.08356	0.905968	1.1267		0.893837	0.98803	1.25421	1.09974	0.832039	1.8118
	OSS	2.23267	2.32167	3.4844	3.79726	2.82444	4.20319		1.06663	0.827007	1.40272	1.07167	0.57293	0.635094

## Sheet: 2.D
		Ad-Scramble							Ad-AFF3ir-ORF2
AFF3	ST	1.04092	1.05705	1.12226	1.28646	0.415841	1.07747		1.23032	1.4562	0.89274	0.992711	1.21815	1.0694
	OSS	0.944975	0.474644	0.614543	1.14806	0.577866	0.42793		0.897026	0.501331	0.751095	1.29194	0.750122	0.90239
ICAM-1	ST	0.757048	0.661904	0.6184	0.520949	1.12458	2.31712		0.697182	1.46686	0.525942	0.811552	4.05737	6.40564
	OSS	7.15093	4.37576	4.84031	5.73868	7.86874	5.56014		3.1621	2.89579	3.75535	3.06861	3.07598	2.18447

## Sheet: 2.E
		Ad-Scramble							Ad-AFF3ir-ORF2
IL-1β	ST	1.14961	1.30587	0.948706	0.859416	1.038	1.02683		1.07148	1.08264	1.17193	1.33935	1.25006	1.37283
	OSS	40.627	54.9134	56.2527	54.0204	49.1095	48.2166		14.2864	5.3574	22.769	7.58965	9.8219	4.01805
IL-6	ST	0.846003	0.881651	0.945819	0.92443	0.881651	0.888781		0.860262	0.325531	0.154417	0.774705	0.724797	0.767575
	OSS	33.5549	32.6993	33.8401	36.1216	24.714	22.4325		19.8658	20.151	22.7177	13.8768	8.173	13.0212

## Sheet: 2.H
Ad-Scramble	Ad-AFF3ir-ORF2		HE
77.8208	12.0314
57.8255	8.74931
68.2508	35.891
53.9131	14.5829
50.2573	39.4242
49.4025	6.40412

## Sheet: 2.J
VCAM-1	Ad-Scramble	Ad-AFF3ir-ORF2
	0.976481	0.213665
	1.12289	0.236711
	1.07185	0.203119
	0.957912	0.130776
	0.952571	0.083161
	0.918297	0.174368
