# Supplementary material for: Disruption of the novel nested gene Aff3ir mediates disturbed flow-induced atherosclerosis in mice
Source: eLife. 2025 May 2;13:RP103413. doi: 10.7554/eLife.103413 (PMC12048156; doi:10.7554/eLife.103413)
Supplement: Figure 3—figure supplement 1—source data 1. [file elife-103413-fig3-figsupp1-data1.xlsx]

## Sheet: Extended figure 3.C
	WT							KO-AFF3ir-ORF2
ORF2	0.404878	1.27708	1.45342	1.04567	0.96586	0.853096		0.011007	0.021205	0.049811	0.029675	0.039359	0.03975
AFF3	0.949236	1.31058	1.69749	0.722538	0.501041	0.819108		1.73522	1.57717	0.909556	0.686421	0.613746	0.38942
ORF1	0.936288	0.923573	1.01247	1.10329	0.816055	1.20832		1.43435	1.00634	1.2636	1.36529	1.47507	1.03682

## Sheet: Extended figure 3.D
	WT	KO-AFF3ir-ORF2
SBP	111	115
	117	107
	120	118
	123	113
	93	116
	98	93
DBP	68	80
	72	65
	67	82
	62	81
	61	76
	56	61
MAP	76	92
	87	79
	79	93
	75	94
	76	89
	87	66

## Sheet: Extended figure 3.E
	WT	KO-AFF3ir-ORF2
AFF3ir-ORF2	0.911947	0.077322
	0.880883	0.071646
	1.34445	0.156803
	1.53371	0.333792
	0.593377	0.399709
	0.735614	0.546019

## Sheet: Extended figure 3.F
		WT							KO-AFF3ir-ORF2
ICAM-1	ST	0.559101	0.796188	1.9201	0.859269	0.316698	1.54883		0.669512	0.570849	0.275702	1.35772	0.57482	1.11048
	OSS 6h	6.73268	7.11657	1.11048	2.43038	7.62735	5.24587		11.6413	16.1245	9.19712	7.84178	9.00784	8.76152
VCAM-1	ST	0.76834	2.9278	0.411743	0.168383	0.687683	1.03513		0.550882	0.702133	0.673531	2.31308	3.07336	3.50598
	OSS 6h	12.9944	12.727	8.45506	8.22386	6.49719	7.06072		20.3904	34.5309	25.2781	10.3375	36.2477	25.9888
IL-1β	ST	0.741783	1.26494	0.663914	1.49388	0.441067	1.39384		0.111034	0.320649	0.650251	0.858011	0.701769	0.058277
	OSS 6h	4.31413	6.72283	6.95991	3.45592	6.0171	7.83031		16.1009	10.9972	13.3528	8.2196	9.8428	9.05722
IL-6	ST	1.1435	2.06116	0.278057	0.326115	0.831307	1.35986		0.819862	0.872637	0.694214	1.49843	1.73322	0.436318
	OSS 6h	3.81968	10.5814	1.23409	6.03542	8.71471	5.51535		9.02204	15.492	10.9545	9.3402	11.6597	13.3934
