# Supplementary material for: Disruption of the novel nested gene Aff3ir mediates disturbed flow-induced atherosclerosis in mice
Source: eLife. 2025 May 2;13:RP103413. doi: 10.7554/eLife.103413 (PMC12048156; doi:10.7554/eLife.103413)
Supplement: Figure 3—figure supplement 2—source data 1. [file elife-103413-fig3-figsupp2-data1.xlsx]

## Sheet: Extended figure 4.A
		APOE-/-													APOE-/-AFF3ir-ORF2-/-
Body weight	Beginning	20.2	20.31	19.83	21.39	19.56	20.26	20.6	19.8	21.04	20.87	20.36	21.05		14.17	20.15	25.8	24.4	21.82	20.03	19.82	20.4	18.85	20.54	21.68	21.48
	End	34.2	35.1	34	35.5	34.4	35.6	35.52	34.2	35.72	35.06	34.88	34.96		33.1	35.2	38	37.4	36.2	35.4	35.08	35	34.88	35.26	36	36.22

## Sheet: Extended figure 4.B
	APOE-/-	APOE-/-AFF3ir-ORF2-/-
Triglycerides	136.8	135.3
	128	144.6
	130.9	130.6
	125.5	147.7
	123.7	132.4
	137.7	138.8
	118.5	134.7
	124.7	128.8
	126.4	125.7
	128.6	133.3
	137.4	124.7
	129.3	132.5
LDL-C	194.1	188.2
	172.3	147.3
	214.8	329.7
	329.1	220.7
	214.3	264.3
	163.2	211.1
	160.1	192.1
	250.4	295
	250.4	266.9
	173.7	190.3
	251.4	272.7
	249.5	208.6
Total cholesterol	1078.3	1192.2
	1062.1	1219.7
	1070.1	1132.8
	1035.6	1083.3
	1181.4	1056.4
	1152.6	1078.1
	1083.4	1042.8
	1017	1068.2
	1023.6	1108.4
	1084.2	1204.4
	1123.7	1024.7
	1121.5	1056.9
HDL-C	60.1	92.1
	50.4	95
	50.4	66.9
	73.7	90.2
	51.4	72.7
	49.5	108.6
	53.6	56.2
	57.4	52.4
	88.4	70.8
	75.7	83.7
	87.4	69.5
	90.3	85.7
