# Supplementary material for: Disruption of the novel nested gene Aff3ir mediates disturbed flow-induced atherosclerosis in mice
Source: eLife. 2025 May 2;13:RP103413. doi: 10.7554/eLife.103413 (PMC12048156; doi:10.7554/eLife.103413)
Supplement: Figure 3—source data 1. [file elife-103413-fig3-data1.xlsx]

## Sheet: 3.A
	Apoe	Apoe-AFF3ir-ORF2
Whole Aorta	6.25731	34.0338
	8.23646	23.2072
	16.2017	35.8943
	16.0615	23.2981
	20.9305	43.0948
	27.1978	42.8021
	21.7612	40.8246
	10.3625	28.6531
	16.8725	33.6735
	18.8356	37.7827
	9.78256	36.7762
	13.9756	30.6572
AA	32.4214	42.5526
	36.4685	38.5481
	28.5129	41.2604
	26.9036	54.8695
	36.3485	48.9612
	31.0544	50.8658
	10.2754	40.352
	13.6219	35.6006
	2.9226	31.5901
	13.06	48.7146
	18.34	36.4192
	10.3424	50.6592
TA	4.8133	45.0901
	17.0967	36.6602
	2.2341	33.8771
	13.0165	37.2219
	13.2918	30.527
	4.4024	49.646
	4.6303	12.3582
	5.3746	7.7569
	4.5079	7.4859
	4.0359	6.7065
	2.819	23.0321
	5.3316	9.5109

## Sheet: 3.E
	Apoe	Apoe-AFF3ir-ORF2
HE	7.0616	31.6592
	11.8462	26.4112
	5.7204	22.7937
	8.48572	25.4563
	9.48234	28.4528
	10.2387	29.3428
Oil Red O	4.2724	34.1846
	6.3432	40.3461
	9.2688	36.6147
	5.48241	38.5712
	8.3612	35.7812
	9.3281	38.5619
Collagen	42.8804	44.7773
	44.7587	45.7338
	45.2123	46.3188
	44.1241	47.4267
	42.7812	43.6718
	45.6539	45.8712

## Sheet: 3.G
	Apoe	Apoe-AFF3ir-ORF2
HE	7.5314	57.065
	39.8227	72.2011
	9.8825	74.407
	42.7593	45.8086
	7.8698	66.6562
	19.0967	60.9549
Oil Red O	18.8086	69.4312
	56.1519	69.2221
	36.3007	59.9983
	30.696	36.8706
	29.1023	70.5372
	18.2679	76.2146
Collagen	72.5768	85.5488
	66.3215	44.1384
	79.1001	56.2482
	44.0116	59.8995
	56.5841	49.4058
	70.9454	45.0441

## Sheet: 3.I
	Apoe	Apoe-AFF3ir-ORF2
VCAM-1	1.51193	3.93836
	1.61654	5.07569
	0.592981	3.56063
	1.26628	3.03409
	0.403932	2.76835
	0.608339	2.59201
