# Supplementary material for: Disruption of the novel nested gene Aff3ir mediates disturbed flow-induced atherosclerosis in mice
Source: eLife. 2025 May 2;13:RP103413. doi: 10.7554/eLife.103413 (PMC12048156; doi:10.7554/eLife.103413)
Supplement: Figure 4—figure supplement 1—source data 1. [file elife-103413-fig4-figsupp1-data1.xlsx]

## Sheet: Extended 5.c
	WT							KO-AFF3ir-ORF2
ORF2	1.40565	0.702827	1.34839	1.12603	0.674197	0.742901		0.387224	0.847474	0.091584	0.39263	0.38455	0.275713
IRF5	0.303973	1.10345	1.5933	0.306088	0.559425	0.544128		0.674559	0.575153	0.713021	0.647081	0.758919	0.291591
IRF8	0.838672	0.725063	1.21098	0.553317	1.68901	0.983624		0.892657	0.458877	0.452559	0.86225	0.810104	0.352618

## Sheet: Extended 5.D
	WT							KO-AFF3ir-ORF2
CCL5	1.04778	1.01913	1.14658	0.937788	0.756459	1.09227		8.32432	3.28828	3.38073	2.94309	3.88343	2.8232
ICAM-1	1.61752	0.803174	0.694374	0.704067	1.38875	0.792116		7.17901	7.64112	9.47276	12.6739	13.8689	8.02101
CXCL10	0.98246	0.744566	1.23497	1.27852	1.09769	0.661802		6.70144	3.46888	3.49301	2.89682	6.12399	6.65515

## Sheet: Extended 5.E
IRF5	ST	OSS 24h
	0.794118	1.76471
	1.23529	0.882353
	0.970588	0.794118

## Sheet: Extended 5.F
IRF5	RCA	LCA
	0.879782	0.926672
	0.980665	0.934852
	1.13955	0.971742
