# Supplementary material for: Disruption of the novel nested gene Aff3ir mediates disturbed flow-induced atherosclerosis in mice
Source: eLife. 2025 May 2;13:RP103413. doi: 10.7554/eLife.103413 (PMC12048156; doi:10.7554/eLife.103413)
Supplement: Figure 4—source data 1. [file elife-103413-fig4-data1.xlsx]

## Sheet: 4.F
		WT							KO-AFF3ir-ORF2
VCAM-1	siNC	0.954505	1.75665	1.84398	0.323722	0.421272	0.693912		3.0585	4.44698	1.52925	3.68797	2.6811	2.16269
	siIRF5	0.306259	0.544433	1.22504	0.430124	0.728411	0.651946		0.890585	0.359192	0.775299	0.504465	0.595769	0.625389
	siIRF8	0.72338	0.418362	0.457811	0.445293	0.591654	0.424203		3.58712	2.17773	4.35546	1.68509	2.10355	3.5133
ICAM-1	siNC	1.07414	1.1836	1.28626	0.928635	0.656644	0.872473		2.00442	3.53861	3.01714	3.27883	3.76639	4.7017
	siIRF5	0.436237	0.451621	0.884653	0.409854	0.53707	0.326054		0.442326	0.252295	0.40142	0.591801	0.604236	0.552169
	siIRF8	0.2959	0.754286	0.412705	0.728592	0.404212	0.382408		2.16322	4.44808	4.0648	4.76734	2.35085	3.81897
IL-1β	siNC	0.998809	0.682207	1.53504	1.12372	0.479061	1.17144		2.40874	2.67267	3.91302	2.34288	4.22304	3.70194
	siIRF5	0.29286	0.951503	0.72612	0.610592	0.701386	0.538971		0.951503	0.290837	0.762221	0.610592	0.557978	0.499405
	siIRF8	0.741378	0.36306	0.450089	0.524233	0.44698	0.417047		3.60071	3.29044	1.77557	2.35917	1.70324	3.17836
IL-6	siNC	1.13127	1.02665	1.13914	0.984832	0.696381	1.02665		1.30853	3.06938	4.25143	4.05008	2.39155	1.71469
	siIRF5	0.658817	0.701225	0.513327	0.278925	0.573533	0.569572		0.691571	0.273185	0.431654	0.49929	0.422771	0.597889
	siIRF8	0.569572	0.419851	0.495841	0.350612	0.419851	0.45944		2.24692	2.21599	3.57501	4.37096	4.55657	4.68468

## Sheet: 4.H
		siNC						AFF3ir-ORF2-/-						siIRF5						AFF3ir-ORF2-/-+siIRF5
ICAM-1	ST	0.697299	1.18738	0.809334	1.44117	0.864821		0.565345	1.28284	2.32733	2.19357	1.92217		0.647165	1.81181	2.08068	1.65499	2.05257		0.612999	1.11065	2.81848	1.46599	2.3725
	OSS	4.47526	5.25737	4.36478	5.0053	5.22112		5.80121	10.265	8.47341	8.02947	8.19562		1.63117	8.555	2.72225	1.95676	0.37929		1.29601	2.22403	1.3671	1.27089	0.154498
IRF5	ST	0.5304	1.05416	1.81155	1.04974	0.554159		0.57507	1.24948	1.52046	0.306968	2.11445		0.030569	0.321564	0.178423	0.009681	0.3665		0.04439	0.114547	0.494881	0.054124	0.465075
	OSS	0.352444	2.00343	3.42972	0.599719	1.70395		0.374176	4.64243	3.84629	0.873605	0.988763		0.101516	0.329428	0.242427	0.075541	0.083681		0.289882	0.288985	0.199336	0.12499	0.05895

## Sheet: 4.J
IRF5	ST				OSS
Nucleus	WT	KO-AFF3ir-ORF2			WT	KO-AFF3ir-ORF2
	1.58822	0.682519			4.90545	13.2498
	1.43075	4.6594			5.84013	17.4572
	1.22221	1.28565			9.28813	16.1537
	0.665729	2.11724			3.88822	7.76496
	0.458183	4.88574			12.6183	16.5727
	0.634897	3.79115			4.47467	9.62473

## Sheet: 4.k
	pCtrl										pCtrl+IRF5
Ad-Scramble	0.722658	0.740575	0.997387	1.33781	1.0153	0.773423	1.03621	1.37663			6.5308	6.55469	6.78761	8.40612	8.35237	8.17917	9.36469	9.46323
Ad-ORF2	0.812243	0.818216	0.79134	0.755506	0.871967	0.725644	0.806271	0.931691			1.07801	1.08697	0.97947	1.03621	1.05412	1.05412	1.11385	1.22434
