# Supplementary material for: Disruption of the novel nested gene Aff3ir mediates disturbed flow-induced atherosclerosis in mice
Source: eLife. 2025 May 2;13:RP103413. doi: 10.7554/eLife.103413 (PMC12048156; doi:10.7554/eLife.103413)
Supplement: Figure 5—figure supplement 1—source data 1. [file elife-103413-fig5-figsupp1-data1.xlsx]

## Sheet: Extended 6.B
IRF5	sh-Scramble	sh-IRF5
	0.908581	0.386302
	1.88159	0.31322
	1.27288	0.106285
	0.729016	0.109623
	0.653214	0.149972
	0.554717	0.094468
