# Supplementary material for: Disruption of the novel nested gene Aff3ir mediates disturbed flow-induced atherosclerosis in mice
Source: eLife. 2025 May 2;13:RP103413. doi: 10.7554/eLife.103413 (PMC12048156; doi:10.7554/eLife.103413)
Supplement: Figure 5—source data 1. [file elife-103413-fig5-data1.xlsx]

## Sheet: 5.B
HE	sh-Scramble							sh-IRF5
ApoE-/-	52.7605	45.3077	28.5033	44.7163	33.7968	29.8966		17.9518	10.877	9.73766	14.0937	29.1049	10.3042
ApoE-/-ORF2-/-	63.1983	65.8575	65.2442	63.5468	59.3256	62.1697		24.4806	11.5364	11.3279	15.0348	17.8774	27.6316
		.B

## Sheet: 5.D
VCAM-1	sh-Scramble							sh-IRF5
ApoE-/-	0.870514	0.828848	0.90576	1.15271	1.21759	1.02457		0.233542	0.248566	0.272427	0.598087	0.411045	0.328155
ApoE-/-ORF2-/-	1.85685	1.81251	1.75452	0.889099	1.41976	1.51747		0.547194	0.523437	0.550521	0.549013	0.530584	0.481719
