# Supplementary material for: Disruption of the novel nested gene Aff3ir mediates disturbed flow-induced atherosclerosis in mice
Source: eLife. 2025 May 2;13:RP103413. doi: 10.7554/eLife.103413 (PMC12048156; doi:10.7554/eLife.103413)
Supplement: Figure 6—figure supplement 1—source data 1. [file elife-103413-fig6-figsupp1-data1.xlsx]

## Sheet: Extended 7.B
AAV-Scramble	AAV-AFF3ir-ORF2
0.685299	2.68116
0.772861	2.61149
0.393373	1.96711
1.02125	2.08694
1.6943	3.16071
1.43292	2.14607

## Sheet: Extended 7.c
	AAV-Scramble	AAV-AFF3ir-ORF2
total cholesterol	1165.4	1283.3
	1099.3	1020.2
	997.2	922.4
	1023.4	1018.8
	1082.7	1321.2
	1344.2	1119.3
Triglycerides	106.3	182.3
	122.6	193.7
	146.3	177.3
	166.2	154.7
	197.5	172.5
	152.6	148.4
LDL-C	197.2	201.4
	167.1	227.6
	222.3	206.9
	245.6	335.6
	257.7	204.4
	193.4	275.3
HDL-C	69.1	44.6
	66.3	65
	86.2	60.4
	82.4	78.3
	52.5	69.2
	57.3	50.5
