# Supplementary material for: Disruption of the novel nested gene Aff3ir mediates disturbed flow-induced atherosclerosis in mice
Source: eLife. 2025 May 2;13:RP103413. doi: 10.7554/eLife.103413 (PMC12048156; doi:10.7554/eLife.103413)
Supplement: Figure 6—source data 1. [file elife-103413-fig6-data1.xlsx]

## Sheet: 6.C
Whole aotra	AAV-Scramble	AAV-AFF3ir-ORF2
Oil Red O	46.1476	24.0236
	46.0214	15.6541
	50.3605	23.104
	61.4611	14.6446
	46.7824	22.6735
	59.5725	16.3753

## Sheet: 6.E
	AAV-Scramble	AAV-AFF3ir-ORF2
HE	60.4838	12.6155
	35.2665	25.8567
	49.6555	23.6734
	44.5378	11.1506
	35.9628	16.2388
	62.9751	13.983
Oil Red O	49.475	17.3561
	44.8154	16.5435
	38.729	13.2164
	40.0645	22.4985
	46.137	21.5557
	43.0729	25.4944
Collagen	54.247	58.181
	56.121	61.752
	49.66	60.087
	53.606	49.332
	56.121	65.991
	61.796	51.404

## Sheet: 6.G
VCAM-1	AAV-Scramble	AAV-AFF3ir-ORF2
	0.534042	0.085934
	0.69605	0.089184
	0.963212	0.102748
	1.15267	0.145021
	1.04741	0.122335
	1.60661	0.144003
