# Supplementary material for: Disruption of the novel nested gene Aff3ir mediates disturbed flow-induced atherosclerosis in mice
Source: eLife. 2025 May 2;13:RP103413. doi: 10.7554/eLife.103413 (PMC12048156; doi:10.7554/eLife.103413)
Supplement: Supplementary file 1. [file elife-103413-supp1.docx]

**The sequences of siRNAs.**

| siRNA | Stand | Sequence |
| --- | --- | --- |
| si*Irf5*-1 | | Forward | | --- | | Reverse | | | GGAAAAGAAACUCUUCUAUTT | | --- | | AUAGAAGAGUUUCUUUUCCTT | |
| si*Irf5*-2 | | Forward | | --- | | Reverse | | | CACCUUUUGAGAUCUUCUUTT | | --- | | AAGAAGAUCUCAAAAGGUGTT | |
| si*Irf8*-1 | | Forward | | --- | | Reverse | | | GUUUAAAGAGGGAGACAAATT | | --- | | UUUGUCUCCCUCUUUAAACTT | |
| si*Irf8*-2 | | Forward | | --- | | Reverse | | | CCAACAAGCUGGAGCGGGATT | | --- | | UCCCGCUCCAGCUUGUUGGTT | |
| si*Irf8*-3 | | Forward | | --- | | Reverse | | | GAGCGAAGUUCCUGAGAUGTT | | --- | | CAUCUCAGGAACUUCGCUCTT | |
