# Supplementary material for: Disruption of the novel nested gene Aff3ir mediates disturbed flow-induced atherosclerosis in mice
Source: eLife. 2025 May 2;13:RP103413. doi: 10.7554/eLife.103413 (PMC12048156; doi:10.7554/eLife.103413)
Supplement: Supplementary file 2. [file elife-103413-supp2.docx]

**Primers for qRT-PCR.**

| Gene | Stand | Sequence |
| --- | --- | --- |
| *Gapdh* | | Forward | | --- | | Reverse | | | AGGTCGGTGTGAACGGATTTG | | --- | | TGTAGACCATGTAGTTGAGGTCA | |
| *Irf5* | | Forward | | --- | | Reverse | | | AGAGACAGGGAAGTACACTGAAG | | --- | | TGGAAGTCACGGCTTTTGTTAAG | |
| *Irf8* | | Forward | | --- | | Reverse | | | CGGGGCTGATCTGGGAAAAT | | --- | | CACAGCGTAACCTCGTCTTC | |
| *Aff3* | | Forward | | --- | | Reverse | | | TCTGTGGGCTCCATCAAC | | --- | | GACCTCATCGCTGTCCTTT | |
| *Aff3ir* | | Forward | | --- | | Reverse | | | GAAACTGAACACGGGAGG | | --- | | GAACCTGATGCCTGGAAC | |
| *Vcam1* | | Forward | | --- | | Reverse | | | AGTTGGGGATTCGGTTGTTCT | | --- | | CCCCTCATTCCTTACCACCC | |
| *Icam1* | | Forward | | --- | | Reverse | | | GTGATGCTCAGGTATCCATCCA | | --- | | CACAGTTCTCAAAGCACAGCG | |
| *Il6* | | Forward | | --- | | Reverse | | | TAGTCCTTCCTACCCCAATTTCC | | --- | | TTGGTCCTTAGCCACTCCTTC | |
| *Il1b* | | Forward | | --- | | Reverse | | | GCAACTGTTCCTGAACTCAACT | | --- | | ATCTTTTGGGGTCCGTCAACT | |
