# Supplementary material for: Disruption of the novel nested gene Aff3ir mediates disturbed flow-induced atherosclerosis in mice
Source: eLife. 2025 May 2;13:RP103413. doi: 10.7554/eLife.103413 (PMC12048156; doi:10.7554/eLife.103413)
Supplement: Supplementary file 3. [file elife-103413-supp3.xlsx]

## Sheet: 所有基因表达量
st_gene_id	gene_id	gene_symbol	fpkm_KO1	fpkm_KO2	fpkm_KO3	fpkm_WT1	fpkm_WT2	fpkm_WT3	tpm_KO1	tpm_KO2	tpm_KO3	tpm_WT1	tpm_WT2	tpm_WT3	read_count_KO1	read_count_KO2	read_count_KO3	read_count_WT1	read_count_WT2	read_count_WT3	average_fpkm_KO	average_fpkm_WT	average_tpm_KO	average_tpm_WT	average_read_count_KO	average_read_count_WT
236643	236643	Sytl5	0.88	0.67	0.64	1.06	1.19	1.41	1.76	1.34	1.26	2.11	2.39	2.84	107	80	79	130	139	168	0.73	1.22	1.45333	2.44667	88.6667	145.667
74488	74488	Lrrc15	40.14	66.27	25.98	55.83	59.42	56.24	79.83	132.26	51.26	111.56	119.65	113.12	3684	6088	2386	4910	5316	5009	44.13	57.1633	87.7833	114.777	4052.67	5078.33
213945	213945	Col28a1	1.23	1.71	1.33	0.39	0.47	0.24	2.44	3.42	2.62	0.78	0.95	0.49	97	129	106	28	35	19	1.42333	0.366667	2.82667	0.74	110.667	27.3333
69576	69576	Smco1	0	0	0	0	0.05	0	0	0	0	0	0.1	0	0	0	0	0	1	0	0	0.0166667	0	0.0333333	0	0.333333
74081	74081	Cep350	6.34	6.99	6.11	4.88	4.71	4.89	12.61	13.96	12.07	9.76	9.49	9.83	1489	1645	1434	1095	1089	1113	6.48	4.82667	12.88	9.69333	1522.67	1099
73677	73677	Psma8	0.12	0.27	0.17	0	0.04	0.09	0.23	0.54	0.33	0	0.09	0.17	3	7	4	0	1	2	0.186667	0.0433333	0.366667	0.0866667	4.66667	1
319197	319197	Gpr4	0.08	0.08	0.1	0.07	0.02	0.11	0.17	0.17	0.21	0.13	0.04	0.22	4	4	5	3	1	5	0.0866667	0.0666667	0.183333	0.13	4.33333	3
16398	16398	Itga2	0.4	0.3	0.3	0.45	0.45	0.37	0.8	0.61	0.6	0.9	0.91	0.75	50	38	38	54	55	45	0.333333	0.423333	0.67	0.853333	42	51.3333
73124	73124	Golim4	53.99	53.5	49.32	40.7	40.01	40.97	107.36	106.79	97.33	81.34	80.57	82.4	4205	4171	3846	3039	3039	3098	52.27	40.56	103.827	81.4367	4074	3058.67
654812	654812	Angptl7	1.62	3.62	1.44	0.1	0.19	0.1	3.23	7.22	2.84	0.19	0.38	0.19	53	118	47	3	6	3	2.22667	0.13	4.43	0.253333	72.6667	4
224109	224109	Nrros	3.49	3.98	4.44	1.65	2.1	2.06	6.93	7.95	8.76	3.3	4.24	4.15	183.67	205.41	231.11	84.11	108.91	106.21	3.97	1.93667	7.88	3.89667	206.73	99.7433
74335	74335	Xrcc3	6.4	6.39	6.89	8.5	8.88	8.55	12.73	12.75	13.6	16.98	17.87	17.19	255	256	278	326	348	331	6.56	8.64333	13.0267	17.3467	263	335
102637839	102637839	Gm10476	0.1	0	0	0	0.1	0	0.2	0	0	0	0.21	0	2.14	0	0	0	2.16	0	0.0333333	0.0333333	0.0666667	0.07	0.713333	0.72
20753	20753	Sprr1a	0.74	0.53	1.25	3.16	2.13	3.36	1.47	1.06	2.47	6.31	4.3	6.76	7	5	12	29	20	31	0.84	2.88333	1.66667	5.79	8	26.6667
66530	66530	Ubxn6	21.63	20.3	21.8	18.78	20.18	18.21	43.02	40.51	43.01	37.52	40.63	36.63	709	670	698	606	649	594	21.2433	19.0567	42.18	38.26	692.333	616.333
18222	18222	Numb	11.94	12.38	12.2	7.7	8.04	7.68	23.75	24.71	24.07	15.4	16.19	15.44	706	730	723.17	441.44	467.64	441.58	12.1733	7.80667	24.1767	15.6767	719.723	450.22
18655	18655	Pgk1	497.06	528.33	510.34	460.72	454.54	441.71	988.47	1054.53	1007.09	920.7	915.21	888.45	14079	14952	14509	12543	12599	12151	511.91	452.323	1016.7	908.12	14513.3	12431
77836	77836	Mlana	0.12	0.29	0	0	0	0	0.24	0.58	0	0	0	0	1	1	0	0	0	0	0.136667	0	0.273333	0	0.666667	0
74478	74478	Snx29	1.79	2.19	2.08	1.62	1.57	1.58	3.57	4.37	4.1	3.24	3.16	3.18	160	231	218	161	162	170	2.02	1.59	4.01333	3.19333	203	164.333
19434	19434	Rax	0.04	0.04	0	0	0	0	0.08	0.08	0	0	0	0	1	1	0	0	0	0	0.0266667	0	0.0533333	0	0.666667	0
15168	15168	Hcn3	0.19	0.11	0.25	0.25	0.24	0.31	0.38	0.22	0.5	0.5	0.49	0.63	12	7	16	14	15	19	0.183333	0.266667	0.366667	0.54	11.6667	16
74525	74525	Fam234b	3.36	4.02	3.32	4.85	4.78	4.93	6.68	8.02	6.55	9.7	9.63	9.91	243	289	240	334	335	347	3.56667	4.85333	7.08333	9.74667	257.333	338.667
14190	14190	Fgl2	3.72	2.78	3.27	5.17	5.52	5.98	7.39	5.54	6.46	10.33	11.11	12.03	237	177	209	316	343	370	3.25667	5.55667	6.46333	11.1567	207.667	343
238333	238333	Samd15	0.19	0.2	0.17	0.1	0.14	0.14	0.37	0.39	0.34	0.21	0.28	0.28	32.82	35.99	38.39	22.1	30.09	30.21	0.186667	0.126667	0.366667	0.256667	35.7333	27.4667
239188	239188	Enox1	0.33	0.73	0.35	1.4	1.29	1.22	0.65	1.46	0.68	2.8	2.59	2.46	21	47	22	89	83	75	0.47	1.30333	0.93	2.61667	30	82.3333
115486517	115486517	LOC115486517	0	0	0	0	0	0.03	0	0	0	0	0	0.06	0	0	0	0	0	1	0	0.01	0	0.02	0	0.333333
229877	229877	Rap1gds1	37.44	36.33	40.3	42	41.33	41.4	74.45	72.51	79.53	83.92	83.21	83.27	2294	2219	2469	2467	2468	2465	38.0233	41.5767	75.4967	83.4667	2327.33	2466.67
239546	239546	Zfp647	1.97	1.98	1.73	1.28	1.19	1.17	3.92	3.94	3.42	2.55	2.4	2.35	75	73	65	44	46	44	1.89333	1.21333	3.76	2.43333	71	44.6667
68915	68915	Vars2	4.72	4.34	4.14	5.29	5.85	5.25	9.39	8.66	8.17	10.56	11.78	10.56	320	310	294	359	390	353	4.4	5.46333	8.74	10.9667	308	367.333
208154	208154	Btla	0	0.02	0.04	0	0	0	0	0.04	0.07	0	0	0	0	1	2	0	0	0	0.02	0	0.0366667	0	1	0
70997	70997	Spef1	1.62	1.82	1.84	1.46	1.58	1.56	3.23	3.63	3.63	2.92	3.18	3.14	59	66	67	51	56	55	1.76	1.53333	3.49667	3.08	64	54
102871	102871	Radx	0.28	0.36	0.47	0.41	0.24	0.44	0.57	0.73	0.94	0.82	0.49	0.88	18	23	30	25	15	27	0.37	0.363333	0.746667	0.73	23.6667	22.3333
235682	235682	Zfp445	14.88	17.04	14.77	15.26	16.57	16.66	29.59	34.01	29.14	30.49	33.37	33.52	1631	1871	1618	1601	1770	1770	15.5633	16.1633	30.9133	32.46	1706.67	1713.67
20662	20662	Sos1	9.08	9.77	8.08	8.6	9.09	8.4	18.06	19.49	15.95	17.19	18.3	16.89	1431	1541	1274	1298	1395	1284	8.97667	8.69667	17.8333	17.46	1415.33	1325.67
69511	69511	Klk12	0	0	0	0	0.08	0	0	0	0	0	0.16	0	0	0	0	0	1	0	0	0.0266667	0	0.0533333	0	0.333333
213464	213464	Rbbp5	12.71	14.3	14.02	13.21	12.7	12.95	25.28	28.54	27.67	26.39	25.57	26.04	761	858	840	755	736	747	13.6767	12.9533	27.1633	26	819.667	746
18718	18718	Pip4k2a	18.54	18.58	17.19	23.75	24.32	25.05	36.86	37.09	33.93	47.46	48.97	50.38	1085	1084	1007	1341	1409	1432	18.1033	24.3733	35.96	48.9367	1058.67	1394
72065	72065	Rap2c	24.39	23.74	23.3	22.29	23.67	24.51	48.51	47.38	45.98	44.54	47.67	49.29	1494	1454	1441	1321	1427	1452	23.81	23.49	47.29	47.1667	1463	1400
77590	77590	Chst15	1.49	2.16	1.69	2.16	2.51	2.4	2.97	4.32	3.34	4.31	5.05	4.83	125	180	141	172	204	195	1.78	2.35667	3.54333	4.73	148.667	190.333
74409	74409	Hyal6	0	0	0.02	0	0.02	0.02	0	0	0.03	0	0.04	0.04	0	0	1	0	1	1	0.00666667	0.0133333	0.01	0.0266667	0.333333	0.666667
218850	218850	Tasor	4.57	5.45	4.67	3.06	2.95	2.93	9.08	10.88	9.22	6.12	5.94	5.9	726.18	879.31	745.51	507.39	496.54	497	4.89667	2.98	9.72667	5.98667	783.667	500.31
11761	11761	Aox1	0.65	1.28	0.77	0.9	1.19	1.4	1.3	2.56	1.51	1.8	2.4	2.82	47	91	53	61	81	94	0.9	1.16333	1.79	2.34	63.6667	78.6667
66725	66725	Lrrk2	8.85	8.35	8.29	10.54	10.78	10.37	17.6	16.66	16.37	21.07	21.7	20.87	1294	1231	1219	1486	1547	1482	8.49667	10.5633	16.8767	21.2133	1248	1505
18824	18824	Plp2	191.22	186.32	193.31	217.34	220.66	218.53	380.28	371.89	381.47	434.32	444.31	439.55	3089.5	3001.23	3144.37	3385.73	3503.57	3431.68	190.283	218.843	377.88	439.393	3078.37	3440.33
17311	17311	Kitl	4.72	3.82	6.33	10.69	11.12	10.83	9.38	7.63	12.49	21.36	22.38	21.79	445	362	599	970	1024	997	4.95667	10.88	9.83333	21.8433	468.667	997
70861	70861	Akr1cl	0.05	0.35	0.25	0	0	0	0.1	0.7	0.49	0	0	0	1	7	5	0	0	0	0.216667	0	0.43	0	4.33333	0
320415	320415	Gchfr	0.46	0.62	1.05	1.88	1.99	1.88	0.91	1.23	2.08	3.76	4.02	3.79	3	4	7	12	13	12	0.71	1.91667	1.40667	3.85667	4.66667	12.3333
328234	328234	Rnf182	0.05	0.12	0.15	0.04	0.07	0.07	0.1	0.23	0.31	0.07	0.14	0.14	3	7	9	2	4	4	0.106667	0.06	0.213333	0.116667	6.33333	3.33333
18212	18212	Ntrk2	0.05	0.09	0.16	0.25	0.31	0.36	0.1	0.18	0.33	0.49	0.62	0.72	6	11	21	29	37	44	0.1	0.306667	0.203333	0.61	12.6667	36.6667
241070	241070	Gpr1	0.43	0.47	0.43	0.6	0.55	0.63	0.86	0.93	0.85	1.2	1.11	1.26	12	13	12	16	15	17	0.443333	0.593333	0.88	1.19	12.3333	16
54137	54137	Acrbp	0.53	0.83	1.08	0.11	0.24	0.17	1.05	1.67	2.13	0.23	0.49	0.34	11	17	21	3	5	3	0.813333	0.173333	1.61667	0.353333	16.3333	3.66667
232223	232223	Txnrd3	5.26	4.77	4.91	6.84	6.4	7.07	10.47	9.52	9.69	13.68	12.88	14.23	246	223	230	307	292	321	4.98	6.77	9.89333	13.5967	233	306.667
65113	65113	Ndfip1	118.72	128.47	112.26	85.2	87.3	89.09	236.1	256.42	221.52	170.26	175.78	179.19	3302	3569	3133	2278	2376	2406	119.817	87.1967	238.013	175.077	3334.67	2353.33
67268	67268	Myl12a	508.26	455.8	512.63	425.41	418.13	417.35	1010.75	909.75	1011.6	850.15	841.91	839.44	13938	12485.9	14104	11240.7	11245	11139	492.23	420.297	977.367	843.833	13509.3	11208.2
70012	70012	Cep85	5.57	5.57	6.01	6.77	7.11	7.49	11.08	11.11	11.85	13.52	14.31	15.06	365	365	394	425	454	476	5.71667	7.12333	11.3467	14.2967	374.667	451.667
13008	13008	Csrp2	24.57	25.05	23.27	34.48	31.99	31	48.86	50	45.93	68.9	64.42	62.36	277	281	265	376	356	340	24.2967	32.49	48.2633	65.2267	274.333	357.333
56200	56200	Ddx21	72.93	61.63	70.07	88.65	88.1	89.18	145.02	123.01	138.28	177.17	177.39	179.39	5941	5026	5715	6924	6999	7052	68.21	88.6433	135.437	177.983	5560.67	6991.67
16521	16521	Kcnj5	0.01	0.01	0.01	0	0	0	0.03	0.03	0.03	0	0	0	1	1	1	0	0	0	0.01	0	0.03	0	1	0
69116	69116	Ubr4	26.58	28.17	25.93	26.37	26.23	26.54	52.87	56.22	51.17	52.7	52.82	53.38	7556	8020	7370	7177	7260	7319	26.8933	26.38	53.42	52.9667	7648.67	7252
226122	226122	Ubtd1	27.82	24.36	24.04	18.04	20.21	15.84	55.33	48.62	47.43	36.04	40.7	31.86	636	556	551	395	452	351	25.4067	18.03	50.46	36.2	581	399.333
23993	23993	Klk7	0.03	0	0	0.1	0	0.03	0.07	0	0	0.21	0	0.07	1	0	0	3	0	1	0.01	0.0433333	0.0233333	0.0933333	0.333333	1.33333
66827	66827	Ttc1	40.41	37.58	36.74	35.17	34.16	34.13	80.35	75.01	72.5	70.29	68.77	68.65	881	818	805	738	730	723	38.2433	34.4867	75.9533	69.2367	834.667	730.333
72238	72238	Tbc1d5	5.63	6.21	5.32	7.96	8.1	8.29	11.19	12.39	10.5	15.91	16.32	16.68	545	604	520	742	765	782	5.72	8.11667	11.36	16.3033	556.333	763
212198	212198	Wdr25	0.97	0.94	0.94	1.44	1.27	1.09	1.94	1.88	1.86	2.88	2.56	2.19	49	59	48	76	61	54	0.95	1.26667	1.89333	2.54333	52	63.6667
19736	19736	Rgs4	3.95	5.03	3.82	3.04	3.16	2.69	7.85	10.05	7.53	6.08	6.36	5.41	192	245	186	142	150	127	4.26667	2.96333	8.47667	5.95	207.667	139.667
56364	56364	Zmym3	7.63	7.5	7.48	8.05	8.1	7.88	15.17	14.98	14.75	16.09	16.31	15.85	446	511	468	485	507	468	7.53667	8.01	14.9667	16.0833	475	486.667
240087	240087	Mdc1	7.69	7.54	8.29	13.74	12.89	13.25	15.3	15.05	16.37	27.47	25.95	26.65	982	961	1060	1678.02	1590	1641	7.84	13.2933	15.5733	26.69	1001	1636.34
17974	17974	Nck2	8.48	7.82	8.9	9.09	9.18	8.8	16.87	15.61	17.56	18.16	18.48	17.71	387	357	407	398	409	390	8.4	9.02333	16.68	18.1167	383.667	399
68642	68642	Tmem216	7.1	7.47	7.66	4.96	4.94	4.43	14.12	14.92	15.13	9.92	9.94	8.91	100	109	112	68	68	61	7.41	4.77667	14.7233	9.59	107	65.6667
17120	17120	Mad1l1	16.48	15.5	17.03	25.09	25.64	23.53	32.78	30.94	33.6	50.14	51.63	47.33	706	665	733	1021	1055	961	16.3367	24.7533	32.44	49.7	701.333	1012.33
66536	66536	Nipsnap3b	23.11	22.14	24.04	25.32	27.84	27.39	45.96	44.2	47.44	50.6	56.05	55.09	536	514	561	564	632	616	23.0967	26.85	45.8667	53.9133	537	604
57276	57276	Vsig2	0	0.06	0	0	0	0.06	0	0.12	0	0	0	0.13	0	1	0	0	0	1	0.02	0.02	0.04	0.0433333	0.333333	0.333333
102634841	102634841	Gm38469	0.25	0.03	0.06	0.18	0.29	0.15	0.51	0.06	0.11	0.35	0.58	0.29	9	1	2	6	10	5	0.113333	0.206667	0.226667	0.406667	4	7
239114	239114	Il17d	2.65	1.97	2.64	1.5	1.88	1.07	5.28	3.92	5.2	2.99	3.78	2.15	46	34	46	25	32	18	2.42	1.48333	4.8	2.97333	42	25
217335	217335	Fbf1	7.95	9.53	8.67	10.01	9.54	9	15.81	19.03	17.12	20	19.22	18.1	739	889	806	894	857	812	8.71667	9.51667	17.32	19.1067	811.333	854.333
57314	57314	Nelfcd	17.56	16.34	18.01	22.96	24.69	22.76	34.92	32.61	35.54	45.89	49.71	45.78	643	598	661	807	883	809	17.3033	23.47	34.3567	47.1267	634	833
114874	114874	Ddhd1	3.79	3.48	3.9	3.35	3.39	3.17	7.54	6.94	7.69	6.7	6.82	6.37	334	306	344	282	291	270	3.72333	3.30333	7.39	6.63	328	281
19720	19720	Trim27	25.29	21.97	25.03	24.98	26.58	25.53	50.3	43.84	49.39	49.92	53.53	51.35	1007	881.13	1000	962	1033	989	24.0967	25.6967	47.8433	51.6	962.71	994.667
58520	58520	Erg28	25.5	25.52	24.56	25.42	26.53	26.36	50.71	50.94	48.46	50.8	53.42	53.01	586	583	566.99	560.97	597	589	25.1933	26.1033	50.0367	52.41	578.663	582.323
18769	18769	Pkig	20.58	26.1	23.27	20.52	21.52	18.07	40.92	52.09	45.92	41.01	43.32	36.35	295	373	333	289	300	249	23.3167	20.0367	46.31	40.2267	333.667	279.333
18747	18747	Prkaca	48.06	41.63	47.36	41.76	44.2	41.72	95.57	83.09	93.45	83.46	88.99	83.91	1770	1533	1749	1477	1591	1492	45.6833	42.56	90.7033	85.4533	1684	1520
329015	329015	Atg2a	8.11	8.23	8.14	6.87	6.28	6.55	16.13	16.43	16.06	13.73	12.64	13.17	829	853	846	662	630	661	8.16	6.56667	16.2067	13.18	842.667	651
242553	242553	Kank4	0.24	0.31	0.16	0.03	0.11	0.02	0.48	0.62	0.33	0.05	0.23	0.05	20	26	14	2	9	2	0.236667	0.0533333	0.476667	0.11	20	4.33333
320150	320150	Zdhhc17	7.01	7.43	6.87	7.57	7.42	7.87	13.94	14.83	13.56	15.14	14.95	15.82	533	574	530	552	552	587	7.10333	7.62	14.11	15.3033	545.667	563.667
104625	104625	Cnot6	19.06	19.77	18.58	22.25	23.35	23.72	37.91	39.45	36.67	44.47	47.01	47.72	1859	1937	1822	2079	2217	2249	19.1367	23.1067	38.01	46.4	1872.67	2181.67
210719	210719	Mkx	1.29	1.52	1.38	0.9	0.88	1.14	2.57	3.03	2.73	1.79	1.78	2.29	69	81	74	46	46	59	1.39667	0.973333	2.77667	1.95333	74.6667	50.3333
67150	67150	Rnf141	24.26	21	23.09	20.2	22.07	21.25	48.24	41.91	45.57	40.37	44.44	42.75	1134.03	1002.04	1090.13	857.01	928.07	869.04	22.7833	21.1733	45.24	42.52	1075.4	884.707
21338	21338	Tacr3	0.02	0.02	0.02	0	0	0	0.03	0.03	0.03	0	0	0	1	1	1	0	0	0	0.02	0	0.03	0	1	0
329910	329910	Acot11	1.69	2.29	1.56	0.52	0.53	0.59	3.35	4.56	3.09	1.03	1.08	1.18	165	224	154	48	51	56	1.84667	0.546667	3.66667	1.09667	181	51.6667
280668	280668	Adam1a	0.51	0.54	0.8	0.45	0.48	0.48	1.01	1.07	1.57	0.89	0.96	0.97	26	27.53	41	22	24	24	0.616667	0.47	1.21667	0.94	31.51	23.3333
235302	235302	D630033O11Rik	0	0	0	0	0	0.19	0	0	0	0	0	0.37	0	0	0	0	0	1	0	0.0633333	0	0.123333	0	0.333333
78689	78689	Naa35	16.7	17.07	17.02	19.96	19.97	19.82	33.22	34.06	33.59	39.88	40.2	39.87	720	735	735	824	840	830	16.93	19.9167	33.6233	39.9833	730	831.333
15331	15331	Hmgn2	128.94	117.91	139.69	168.91	175.49	181.94	256.41	235.34	275.67	337.55	353.34	365.96	2311	2108	2519	2917	3088	3169	128.847	175.447	255.807	352.283	2312.67	3058
13002	13002	Dnajc5	41.35	40.76	40.88	39.52	39.71	40.26	82.22	81.36	80.67	78.97	79.96	80.98	3062	3019	3030	2804	2865	2894	40.9967	39.83	81.4167	79.97	3037	2854.33
19012	19012	Plpp1	91.43	67.24	112.63	58.2	57.94	59.44	181.82	134.2	222.27	116.3	116.67	119.55	2233	1640	2763	1367	1386	1410	90.4333	58.5267	179.43	117.507	2212	1387.67
320795	320795	Pkn1	29.25	27.91	28.54	25.88	24.86	24.55	58.16	55.72	56.33	51.72	50.06	49.38	2831.24	2770.52	2772.28	2295.86	2251.61	2281.4	28.5667	25.0967	56.7367	50.3867	2791.35	2276.29
14673	14673	Gna12	37.44	33.48	38.02	34.03	34.89	33.85	74.46	66.82	75.03	68	70.24	68.08	1098	981	1119	959	1001	964	36.3133	34.2567	72.1033	68.7733	1066	974.667
232974	232974	Gm4881	0.04	0	0	0	0	0	0.07	0	0	0	0	0	1	0	0	0	0	0	0.0133333	0	0.0233333	0	0.333333	0
11306	11306	Abcb7	4.49	4.76	5.04	4.54	4.6	5.03	8.93	9.51	9.94	9.07	9.26	10.12	449	477	504	435	448	488	4.76333	4.72333	9.46	9.48333	476.667	457
104346	104346	Gas8	21.77	21.2	22.01	21.62	20.59	20.44	43.3	42.31	43.44	43.2	41.47	41.11	623	617	641	584	581	579	21.66	20.8833	43.0167	41.9267	627	581.333
66405	66405	Mcts2	11	8.98	10.77	9.85	10.91	10.99	21.88	17.93	21.26	19.69	21.97	22.1	106	86	105	92	104	103	10.25	10.5833	20.3567	21.2533	99	99.6667
71787	71787	Trnau1ap	23.11	22.32	25.68	26.55	27.17	29.08	45.95	44.54	50.67	53.07	54.71	58.49	378	370	431	417	448	465	23.7033	27.6	47.0533	55.4233	393	443.333
213522	213522	Plekhg6	0.08	0.26	0.22	0.15	0.06	0.12	0.16	0.52	0.43	0.29	0.12	0.25	4	13	11	9	4	6	0.186667	0.11	0.37	0.22	9.33333	6.33333
386612	386612	Thoc6	10.9	9.89	9.13	13.09	11.98	11.85	21.67	19.73	18.01	26.16	24.12	23.84	246.87	224.46	206.04	287.33	266.84	261.75	9.97333	12.3067	19.8033	24.7067	225.79	271.973
56332	56332	Amotl2	97.81	90.26	104.15	134.14	129.57	128.28	194.5	180.16	205.53	268.06	260.89	258.03	7015	6474	7477	9232	9066	8936	97.4067	130.663	193.397	262.327	6988.67	9078
75607	75607	Wnk2	0.01	0.01	0	0	0.02	0	0.02	0.02	0	0	0.04	0	1	1	0	0	2	0	0.00666667	0.00666667	0.0133333	0.0133333	0.666667	0.666667
103266	103266	Tmem263	29.81	29.49	25.41	18.95	19.88	19.8	59.29	58.87	50.14	37.86	40.02	39.82	1905	1886	1626	1161	1239	1228	28.2367	19.5433	56.1	39.2333	1805.67	1209.33
20680	20680	Sox7	0.2	0.24	0.53	0.08	0.08	0.08	0.4	0.48	1.05	0.15	0.15	0.15	11	13	29	4	4	4	0.323333	0.08	0.643333	0.15	17.6667	4
19655	19655	Rbmx	14.79	13.68	18.57	14.14	14	14.82	29.42	27.3	36.65	28.26	28.18	29.8	584	540	735	536	540	568	15.68	14.32	31.1233	28.7467	619.667	548
22327	22327	Vbp1	40.71	32.46	36.51	35.16	33.94	36.14	80.96	64.8	72.04	70.27	68.34	72.68	987	786	889	820	806	851	36.56	35.08	72.6	70.43	887.333	825.667
19775	19775	Xpr1	11.02	11.66	11.49	8.67	9.46	8.77	21.92	23.27	22.66	17.33	19.05	17.64	1482	1570	1545	1117	1239	1144	11.39	8.96667	22.6167	18.0067	1532.33	1166.67
234865	234865	Nup133	7.32	6.68	7.3	9.96	9.55	9.68	14.55	13.34	14.41	19.91	19.23	19.48	738	675	737	963	939	948	7.1	9.73	14.1	19.54	716.667	950
210106	210106	Tent4a	15.53	15.05	16	16.21	17.41	17.55	30.88	30.04	31.57	32.4	35.05	35.31	1073	1033	1107	1080	1172	1177	15.5267	17.0567	30.83	34.2533	1071	1143
226744	226744	Cnst	10.01	9.93	11.16	13.88	12.58	14.16	19.9	19.82	22.03	27.75	25.33	28.48	792	787	882	1049	968	1081	10.3667	13.54	20.5833	27.1867	820.333	1032.67
12460	12460	Ccs	31.46	33.47	29.7	31.3	33.46	31.5	62.57	66.8	58.61	62.55	67.38	63.36	451	478	429	433	472	439	31.5433	32.0867	62.66	64.43	452.667	448
14062	14062	F2r	184.32	165.27	178.01	178.4	175.6	184.65	366.55	329.86	351.27	356.51	353.58	371.4	10301	9241	9965	9563	9577	10017	175.867	179.55	349.227	360.497	9835.67	9719
16480	16480	Jup	16.49	14.77	16.58	16.7	17.14	16.18	32.8	29.48	32.73	33.38	34.52	32.54	1019	922	1016	985	1008	987	15.9467	16.6733	31.67	33.48	985.667	993.333
54003	54003	Nell2	0.5	1.15	0.87	0.47	0.47	0.47	0.99	2.31	1.72	0.93	0.94	0.94	28	63	49	24	24	26	0.84	0.47	1.67333	0.936667	46.6667	24.6667
70099	70099	Smc4	27.16	24.96	30.78	34.23	33.81	35.34	54	49.81	60.74	68.4	68.07	71.09	1963	1822	2213	2377	2397	2526	27.6333	34.46	54.85	69.1867	1999.33	2433.33
22390	22390	Wee1	7.18	6.74	7.13	9.68	9.5	9.96	14.28	13.45	14.07	19.34	19.13	20.04	412	386	408	528	530	551	7.01667	9.71333	13.9333	19.5033	402	536.333
72325	72325	Vps9d1	3.9	4.19	4.06	3.83	3.79	3.8	7.75	8.36	8.02	7.65	7.63	7.64	182	196	191	172	173	172	4.05	3.80667	8.04333	7.64	189.667	172.333
72982	72982	Tmem138	5.94	7.73	5.94	6.02	5.35	5.33	11.8	15.44	11.71	12.02	10.78	10.72	138.37	161.19	141	130.06	125.41	119.23	6.53667	5.56667	12.9833	11.1733	146.853	124.9
30954	30954	Siva1	49.01	41.05	48.96	60.8	68.39	67.97	97.47	81.93	96.62	121.5	137.7	136.71	449	377	459	543	613	611	46.34	65.72	92.0067	131.97	428.333	589
83553	83553	Tktl1	0.07	0	0.02	0.03	0.05	0.1	0.15	0	0.05	0.05	0.1	0.21	3	0	1	1	2	4	0.03	0.06	0.0666667	0.12	1.33333	2.33333
115489733	115489733	LOC115489733	2.25	2.39	1.52	1.96	1.97	1.81	4.48	4.77	3	3.92	3.96	3.65	93.38	98.98	63.21	78.04	79.55	72.94	2.05333	1.91333	4.08333	3.84333	85.19	76.8433
15982	15982	Ifrd1	82.86	77.22	83.82	146.21	144.96	141.73	164.77	154.12	165.41	292.19	291.87	285.07	2335	2175	2371	3960	3996	3878	81.3	144.3	161.433	289.71	2293.67	3944.67
66410	66410	Mterf3	13.65	12.29	14.58	14.34	13.94	15.64	27.14	24.53	28.77	28.65	28.08	31.47	332	310.05	365.02	342	338	378.01	13.5067	14.64	26.8133	29.4	335.69	352.67
667256	667256	4921511M17Rik	0	0	0.02	0	0	0	0	0	0.04	0	0	0	0	0	0.25	0	0	0	0.00666667	0	0.0133333	0	0.0833333	0
241201	241201	Cdh7	0	0	0.01	0	0	0	0	0	0.03	0	0	0	0	0	1	0	0	0	0.00333333	0	0.01	0	0.333333	0
74467	74467	Pus10	8.1	8.69	8.56	9.18	8.92	9.55	16.11	17.35	16.9	18.35	17.95	19.21	493	537	518	531	529	563.41	8.45	9.21667	16.7867	18.5033	516	541.137
71949	71949	Cers5	48.37	45.36	50.16	46.83	48.71	46.01	96.19	90.54	98.98	93.59	98.08	92.54	1533	1437	1595	1426	1510	1416	47.9633	47.1833	95.2367	94.7367	1521.67	1450.67
73703	73703	Dppa2	0	0	0.03	0.07	0.03	0.03	0	0	0.06	0.14	0.07	0.07	0	0	1	2	1	1	0.01	0.0433333	0.02	0.0933333	0.333333	1.33333
68027	68027	Tmem178	0.35	0.46	0.31	0.04	0.04	0.04	0.69	0.92	0.61	0.08	0.08	0.08	9	12	8	1	1	1	0.373333	0.04	0.74	0.08	9.66667	1
100040201	100040201	Gm10229	0	0	0.18	0	0	0	0	0	0.35	0	0	0	0	0	1	0	0	0	0.06	0	0.116667	0	0.333333	0
16337	16337	Insr	6.79	8.43	6.6	6.38	6.45	6.72	13.5	16.83	13.03	12.76	12.98	13.52	1125	1400	1095	1014	1041	1081	7.27333	6.51667	14.4533	13.0867	1206.67	1045.33
21944	21944	Tnfsf12	8.05	9.63	10.15	5.61	6.16	5.89	16.01	19.21	20.04	11.21	12.4	11.84	208.87	249.41	264.44	139.9	156.44	148.29	9.27667	5.88667	18.42	11.8167	240.907	148.21
18018	18018	Nfatc1	3.95	4.5	4.26	3.66	3.89	3.64	7.85	8.97	8.41	7.3	7.83	7.31	304	350	329	273	294	272	4.23667	3.73	8.41	7.48	327.667	279.667
60363	60363	Cldn15	0.14	0.24	0.14	0.11	0.18	0.21	0.28	0.49	0.27	0.22	0.36	0.43	4	7	4	3	5	6	0.173333	0.166667	0.346667	0.336667	5	4.66667
14270	14270	Srgap2	8.25	9.21	9.08	8.17	8.04	8.18	16.41	18.39	17.93	16.32	16.18	16.45	1109	1235	1220	1081	1066	1086	8.84667	8.13	17.5767	16.3167	1188	1077.67
74122	74122	Tmem43	61.23	63.71	62.06	67.55	67.58	68.19	121.76	127.17	122.46	134.99	136.08	137.15	2932	3052	2978	3104	3160	3170	62.3333	67.7733	123.797	136.073	2987.33	3144.67
14807	14807	Grik3	0.02	0.01	0.01	0.01	0	0.01	0.04	0.03	0.01	0.03	0	0.03	3	2	1	2	0	2	0.0133333	0.00666667	0.0266667	0.02	2	1.33333
102115	102115	Dohh	32.35	30.5	34.16	37.35	36.53	34.41	64.34	60.88	67.41	74.64	73.56	69.22	691	652	735	768	765	712	32.3367	36.0967	64.21	72.4733	692.667	748.333
218314	218314	Zfp595	1.3	1.43	1.49	1.18	1.31	1.12	2.59	2.85	2.95	2.36	2.63	2.25	87	95	99.99	76	87	72	1.40667	1.20333	2.79667	2.41333	93.9967	78.3333
26901	26901	Ss18l2	18.86	25.47	20.56	22.36	27.32	24.76	37.5	50.84	40.58	44.68	55	49.8	85	113	95	99	124	109	21.63	24.8133	42.9733	49.8267	97.6667	110.667
76561	76561	Snx7	65.79	50.34	64.41	44.64	47.38	45.41	130.84	100.49	127.1	89.21	95.39	91.33	2266	1736	2227	1478	1594	1523	60.18	45.81	119.477	91.9767	2076.33	1531.67
52830	52830	Pnrc2	46.29	57.24	43.81	42.15	41.49	41.89	92.05	114.25	86.46	84.24	83.54	84.25	1388	1714	1317	1213	1214	1217	49.1133	41.8433	97.5867	84.01	1473	1214.67
73061	73061	Cldn34c1	1.47	1.6	1.31	1.66	2.03	1.7	2.92	3.19	2.59	3.32	4.09	3.42	81	87.68	72.24	88	108.65	90.49	1.46	1.79667	2.9	3.61	80.3067	95.7133
67811	67811	Poldip2	48.96	47.88	46.71	42.35	43	43.15	97.35	95.56	92.17	84.63	86.59	86.78	1499	1465	1435	1246	1288	1283	47.85	42.8333	95.0267	86	1466.33	1272.33
232430	232430	Crebl2	3.27	3.42	3.26	1.29	1.12	1.15	6.51	6.83	6.44	2.57	2.25	2.31	184	188	189	68	56	61	3.31667	1.18667	6.59333	2.37667	187	61.6667
52589	52589	Ncald	0.93	0.73	0.71	0.65	0.43	0.8	1.84	1.45	1.41	1.29	0.87	1.6	54	42	42	36	25	46	0.79	0.626667	1.56667	1.25333	46	35.6667
68957	68957	Paqr6	0.09	0.05	0.07	0.11	0	0.11	0.17	0.1	0.14	0.21	0	0.21	2	1	2	2	0	2	0.07	0.0733333	0.136667	0.14	1.66667	1.33333
214763	214763	Cgas	1.87	2.04	2.01	2.29	2.49	2.89	3.72	4.07	3.97	4.58	5.01	5.81	130	142	140	153	169	195	1.97333	2.55667	3.92	5.13333	137.333	172.333
58231	58231	Stk4	18.07	16.47	18.64	15.53	14.67	16.33	35.93	32.87	36.77	31.04	29.53	32.85	1534	1289	1510	1285	1260	1293	17.7267	15.51	35.19	31.14	1444.33	1279.33
14548	14548	Mrps33	28.36	29.85	29.8	33.39	29.09	32.97	56.39	59.59	58.8	66.72	58.56	66.31	403	423	426	456	405	455	29.3367	31.8167	58.26	63.8633	417.333	438.667
19027	19027	Sypl	30.35	27.91	28.95	24.76	25.27	25.58	60.35	55.72	57.13	49.49	50.89	51.45	2400	2210	2292	1876	1948	1963	29.07	25.2033	57.7333	50.61	2300.67	1929
105940408	105940408	Gm20498	6.71	6.49	8.03	6.7	6.54	7.48	13.34	12.95	15.84	13.38	13.16	15.05	104.55	100.91	128.17	105.04	105.74	108.65	7.07667	6.90667	14.0433	13.8633	111.21	106.477
102631856	102631856	Gm30083	0	0.04	0.04	0	0	0	0	0.08	0.08	0	0	0	0	1	1	0	0	0	0.0266667	0	0.0533333	0	0.666667	0
215031	215031	Vgll2	0	0.04	0	0	0	0	0	0.08	0	0	0	0	0	1	0	0	0	0	0.0133333	0	0.0266667	0	0.333333	0
223753	223753	Cerk	7.55	9.06	9.96	3.04	3.37	3.54	15.01	18.08	19.66	6.08	6.79	7.13	588	707	778	227	256	268	8.85667	3.31667	17.5833	6.66667	691	250.333
213603	213603	Slc44a3	0.53	0.31	0.12	0.12	0.12	0.05	1.05	0.62	0.24	0.25	0.25	0.1	22	13	5	5	5	2	0.32	0.0966667	0.636667	0.2	13.3333	4
26436	26436	Psg16	4.83	4.44	4.38	3.37	3.52	3.4	9.6	8.86	8.65	6.73	7.1	6.84	365.02	336	331.75	243.97	259.92	250	4.55	3.43	9.03667	6.89	344.257	251.297
70097	70097	Sash1	27.55	29.03	32.22	25.25	26.53	24.96	54.78	57.94	63.58	50.46	53.43	50.2	3431	3627	4024	3010	3217	3020	29.6	25.58	58.7667	51.3633	3694	3082.33
14815	14815	Nr3c1	17.74	17.24	17.01	15.64	15.8	15.6	35.28	34.41	33.57	31.25	31.82	31.37	1989	1929	1910	1677	1714	1689	17.33	15.68	34.42	31.48	1942.67	1693.33
18131	18131	Notch3	1.32	2.23	1.4	0.52	0.6	0.66	2.62	4.46	2.77	1.04	1.21	1.33	187	317	199	71	83	91	1.65	0.593333	3.28333	1.19333	234.333	81.6667
26556	26556	Homer1	5.29	5.27	5.48	5.87	5.98	5.59	10.52	10.51	10.81	11.72	12.05	11.25	416	415	402	421	433	417	5.34667	5.81333	10.6133	11.6733	411	423.667
243853	243853	Fkrp	15.03	13.94	15.51	13.49	13.64	14.05	29.9	27.82	30.61	26.97	27.47	28.26	695	644	718	598	616	630	14.8267	13.7267	29.4433	27.5667	685.667	614.667
26415	26415	Mapk13	29.35	23.75	31.08	10.25	10.62	11.74	58.37	47.41	61.33	20.49	21.38	23.62	600	484	638	202	213	233	28.06	10.87	55.7033	21.83	574	216
230784	230784	Sesn2	22.32	24.39	18.49	22.3	21.14	21.31	44.39	48.68	36.48	44.56	42.56	42.87	971	1061	806	931	898	900	21.7333	21.5833	43.1833	43.33	946	909.667
110911	110911	Cds2	17.62	17.35	20.32	13.58	12.67	14.34	35.03	34.63	40.1	27.14	25.5	28.85	2386	2293	2694	1796	1745	1860	18.43	13.53	36.5867	27.1633	2457.67	1800.33
83395	83395	Sp6	0.04	0.09	0.12	0.04	0.07	0.05	0.07	0.18	0.24	0.07	0.15	0.11	2	5	7	2	4	3	0.0833333	0.0533333	0.163333	0.11	4.66667	3
77619	77619	Prelid2	7.01	8.41	7.52	7.47	5.73	6.96	13.95	16.79	14.83	14.93	11.54	13.99	58	69	63	60	47	56	7.64667	6.72	15.19	13.4867	63.3333	54.3333
18124	18124	Nr4a3	0.66	0.77	0.82	0.7	0.41	0.48	1.32	1.54	1.62	1.39	0.83	0.97	65	73	80	65	41	45	0.75	0.53	1.49333	1.06333	72.6667	50.3333
215436	215436	Slc35e3	13.77	12.72	12.98	12.19	12.84	12.2	27.39	25.39	25.62	24.35	25.84	24.54	806	745	761	684	733	693	13.1567	12.41	26.1333	24.91	770.667	703.333
65105	65105	Arl6ip4	37.08	36.46	40.43	39.53	36.82	35.8	73.74	72.78	79.78	78.99	74.15	72.01	616	604	676	633	601	578	37.99	37.3833	75.4333	75.05	632	604
319160	319160	H4c12	1.53	2	1.1	0.38	0.79	0.78	3.04	4	2.18	0.76	1.59	1.57	4	5.1	3	1	2.12	2	1.54333	0.65	3.07333	1.30667	4.03333	1.70667
105727	105727	Slc38a1	30.13	31.14	29.18	37.94	37.06	37.49	59.91	62.16	57.58	75.82	74.63	75.41	3835	3947	3699	4603	4584	4614	30.15	37.4967	59.8833	75.2867	3827	4600.33
57275	57275	Lenep	0.41	0.97	1.09	1.28	0.42	0.99	0.82	1.95	2.14	2.55	0.84	1.99	3	7	8	9	3	7	0.823333	0.896667	1.63667	1.79333	6	6.33333
230903	230903	Fbxo44	3.71	5.22	4.22	3.04	3.17	3.12	7.38	10.41	8.34	6.08	6.39	6.28	98	139	116	70	80	79	4.38333	3.11	8.71	6.25	117.667	76.3333
629378	629378	Dact3	15.04	15.71	15.14	13.6	12.79	11.65	29.92	31.35	29.88	27.17	25.76	23.43	701	732	707	608	582	527	15.2967	12.68	30.3833	25.4533	713.333	572.333
100862365	100862365	Gm21677	0	0	0	0.01	0	0	0	0	0	0.01	0	0	0	0	0	0.13	0	0	0	0.00333333	0	0.00333333	0	0.0433333
109660	109660	Ctrl	0.09	0	0.18	0	0	0.37	0.18	0	0.35	0	0	0.73	1	0	2	0	0	4	0.09	0.123333	0.176667	0.243333	1	1.33333
382109	382109	Fbxw26	0	0.04	0.04	0	0	0	0	0.07	0.08	0	0	0	0	1	1	0	0	0	0.0266667	0	0.05	0	0.666667	0
20672	20672	Sox18	0	0	0.04	0.04	0	0.08	0	0	0.08	0.08	0	0.17	0	0	1	1	0	2	0.0133333	0.04	0.0266667	0.0833333	0.333333	1
14570	14570	Arhgdig	5.48	5.71	5.29	7.69	6.81	7.71	10.89	11.4	10.44	15.36	13.71	15.5	76	79	74	103	93	104	5.49333	7.40333	10.91	14.8567	76.3333	100
243328	243328	Slc29a4	0.15	0.11	0.26	0.5	0.27	0.36	0.3	0.22	0.51	1	0.54	0.72	7	5	12	22	12	16	0.173333	0.376667	0.343333	0.753333	8	16.6667
16423	16423	Cd47	25.45	35.55	25.15	22.72	24.53	23.99	50.61	70.96	49.62	45.39	49.39	48.25	975	1346	976	845	904	896	28.7167	23.7467	57.0633	47.6767	1099	881.667
13404	13404	Dmc1	0.07	0.09	0.09	0	0.03	0.1	0.14	0.18	0.18	0	0.06	0.19	1	3	3	0	1	3	0.0833333	0.0433333	0.166667	0.0833333	2.33333	1.33333
67059	67059	Ola1	55.05	49.42	55.42	56.59	54.23	59.23	109.48	98.63	109.36	113.1	109.2	119.13	1682	1571	1703	1613	1665	1717	53.2967	56.6833	105.823	113.81	1652	1665
319263	319263	Pcmtd1	14.8	17.11	13.75	12.41	12.78	12.31	29.43	34.15	27.14	24.8	25.74	24.76	1352	1562	1260	1094	1136	1088	15.22	12.5	30.24	25.1	1391.33	1106
13823	13823	Epb41l3	103.85	97.27	100.75	106.84	107.7	108.06	206.52	194.14	198.81	213.51	216.85	217.35	6978	6507	6759	6847	7038	7031	100.623	107.533	199.823	215.903	6748	6972
75141	75141	Rasd2	0.04	0.02	0.06	0.02	0	0	0.09	0.04	0.13	0.05	0	0	2	1	3	1	0	0	0.04	0.00666667	0.0866667	0.0166667	2	0.333333
14412	14412	Slc6a13	0	0	0	0.05	0	0	0	0	0	0.11	0	0	0	0	0	1	0	0	0	0.0166667	0	0.0366667	0	0.333333
22637	22637	Zap70	0	0	0.05	0.03	0	0.03	0	0	0.1	0.06	0	0.06	0	0	1	1	0	1	0.0166667	0.02	0.0333333	0.04	0.333333	0.666667
259172	259172	Mfrp	0.08	0.16	0.09	0.09	0.09	0.03	0.17	0.31	0.17	0.18	0.18	0.07	6.1	11.32	6.29	6.11	6.28	2.45	0.11	0.07	0.216667	0.143333	7.90333	4.94667
67933	67933	Hcfc2	10.98	11.16	10.74	10.93	10.12	10.08	21.84	22.28	21.2	21.84	20.38	20.27	597.01	623.05	605.01	527.01	518.01	501.02	10.96	10.3767	21.7733	20.83	608.357	515.347
110835	110835	Chrna5	0	0.02	0	0.07	0.05	0.02	0	0.04	0	0.14	0.09	0.05	0	1	0	3	2	1	0.00666667	0.0466667	0.0133333	0.0933333	0.333333	2
109082	109082	Fbxw17	6.75	7.91	7.86	7.74	8.36	8.06	13.43	15.79	15.51	15.47	16.82	16.22	193	225	223	211	236	222	7.50667	8.05333	14.91	16.17	213.667	223
21892	21892	Tll1	29.42	19.51	31.7	24.36	24.41	24.64	58.5	38.95	62.55	48.68	49.15	49.56	2557	1706	2729	2039	2092	2059	26.8767	24.47	53.3333	49.13	2330.67	2063.33
74145	74145	F13a1	0.15	0.35	0.5	0.08	0.17	0.09	0.3	0.7	0.99	0.16	0.35	0.19	10	23	33	5	11	6	0.333333	0.113333	0.663333	0.233333	22	7.33333
208613	208613	Tmem212	0	0	0.12	0	0	0	0	0	0.24	0	0	0	0	0	1	0	0	0	0.04	0	0.08	0	0.333333	0
100862368	100862368	Gm21680	0	0.09	0	0	0	0.1	0	0.19	0	0	0	0.19	0	1	0	0	0	1	0.03	0.0333333	0.0633333	0.0633333	0.333333	0.333333
235442	235442	Rab8b	14.25	14.89	17.3	10.53	10.03	10.35	28.33	29.72	34.14	21.05	20.19	20.82	1163	1217	1414	824	798	820	15.48	10.3033	30.73	20.6867	1264.67	814
20317	20317	Serpinf1	253.87	344.27	251.58	391.3	393.39	390.87	504.85	687.14	496.45	781.98	792.09	786.2	5660	7663	5636	8395	8596	8466	283.24	391.853	562.813	786.757	6319.67	8485.67
110751	110751	Adam33	6.95	9.67	4.06	5.38	5.34	3.72	13.82	19.29	8	10.76	10.75	7.48	338	544	212	268	266	199	6.89333	4.81333	13.7033	9.66333	364.667	244.333
69527	69527	Mrps9	25.69	22.84	25.89	27.09	28.34	25.86	51.09	45.59	51.09	54.14	57.07	52.02	541	482	549	554	589	533	24.8067	27.0967	49.2567	54.41	524	558.667
268395	268395	Mpg	10.81	11.31	12.22	11.97	11.32	10.36	21.5	22.58	24.11	23.91	22.79	20.85	290.46	303.69	329.61	309.08	297.7	270.46	11.4467	11.2167	22.73	22.5167	307.92	292.413
66169	66169	Tomm7	22.71	20.55	25.79	22.52	25.89	23.9	45.15	41.02	50.9	45.01	52.12	48.07	347	313	397	332	389	355	23.0167	24.1033	45.69	48.4	352.333	358.667
241944	241944	Zfp267	2.73	2.73	2.87	2.45	2.43	2.92	5.43	5.46	5.66	4.9	4.89	5.87	316	317	332	272	274	328	2.77667	2.6	5.51667	5.22	321.667	291.333
13385	13385	Dlg4	12.42	14.16	12.97	10.79	10.77	10.66	24.69	28.27	25.59	21.56	21.69	21.44	660	741	683	546	557	531	13.1833	10.74	26.1833	21.5633	694.667	544.667
83397	83397	Akap12	131.99	102.54	120.14	105.91	104.29	105.69	262.49	204.66	237.09	211.65	210	212.58	14371	11178	13090	11049	11066	11167	118.223	105.297	234.747	211.41	12879.7	11094
66847	66847	Hint3	6.7	5.55	5.6	6.17	4.93	7.67	13.33	11.07	11.04	12.33	9.93	15.42	155.77	173.99	169.03	138.01	112.55	138	5.95	6.25667	11.8133	12.56	166.263	129.52
68499	68499	Mrpl53	33.25	35.99	35.76	35.71	37.27	36.69	66.13	71.84	70.56	71.37	75.04	73.81	212	227	232	222	237	228	35	36.5567	69.51	73.4067	223.667	229
20016	20016	Polr1c	53.95	51.57	50.95	49.4	48.27	48.04	107.28	102.93	100.54	98.72	97.19	96.62	1017	970	966	897	893	880	52.1567	48.57	103.583	97.51	984.333	890
22121	22121	Rpl13a	1522.57	1509.54	1470.55	1611.14	1588.82	1540.33	3027.84	3012.98	2901.91	3219.7	3199.11	3098.2	20966	20706	20412	21419	21537	20622	1500.89	1580.1	2980.91	3172.34	20694.7	21192.7
102635385	102635385	Gm32742	0	0	0.01	0	0.01	0	0	0	0.02	0	0.02	0	0	0	1	0	1	0	0.00333333	0.00333333	0.00666667	0.00666667	0.333333	0.333333
630994	630994	Lce3d	0.19	0	0	0	0	0	0.38	0	0	0	0	0	1	0	0	0	0	0	0.0633333	0	0.126667	0	0.333333	0
227298	227298	Retreg2	18.54	19.58	20.09	16.02	16.5	15.07	36.87	39.08	39.64	32.02	33.23	30.31	769	808	836	639	669	601	19.4033	15.8633	38.53	31.8533	804.333	636.333
14199	14199	Fhl1	152.31	105.42	152.46	96.03	97.34	100.13	302.9	210.4	300.87	191.91	196	201.41	5797	4027	5848	3604	3692	3789	136.73	97.8333	271.39	196.44	5224	3695
20248	20248	Serpinb3a	0.04	0	0	0	0	0	0.08	0	0	0	0	0	1	0	0	0	0	0	0.0133333	0	0.0266667	0	0.333333	0
243339	243339	Tmem130	0.02	0.09	0	0.02	0.05	0.07	0.04	0.18	0	0.05	0.09	0.14	1	4	0	1	2	3	0.0366667	0.0466667	0.0733333	0.0933333	1.66667	2
11546	11546	Parp2	10.49	11.4	10.43	15.62	16.55	17.02	20.86	22.75	20.59	31.21	33.32	34.24	298	323	300	425	459	469	10.7733	16.3967	21.4	32.9233	307	451
102414	102414	Clk3	24.14	26.28	24.8	28.74	28.97	28.72	48	52.45	48.93	57.44	58.33	57.77	833	880	855	972	962	978	25.0733	28.81	49.7933	57.8467	856	970.667
77034	77034	2510039O18Rik	28.06	26.35	28.47	25.68	25.12	26.84	55.8	52.6	56.19	51.32	50.58	53.99	1274	1202	1293	1115	1115	1183	27.6267	25.88	54.8633	51.9633	1256.33	1137.67
16814	16814	Lbx1	0	0	0	0	0.02	0	0	0	0	0	0.05	0	0	0	0	0	1	0	0	0.00666667	0	0.0166667	0	0.333333
75304	75304	4930563E22Rik	0.07	0.51	0.2	0.15	0.15	0.13	0.14	1.02	0.4	0.3	0.3	0.26	4.03	28.25	11.13	8.06	8.04	7.07	0.26	0.143333	0.52	0.286667	14.47	7.72333
100862455	100862455	LOC100862455	280.71	288.66	296.4	288.36	322.83	290.79	558.22	576.15	584.9	576.27	650.01	584.9	1044.63	1053.53	1135.79	1059.86	1217.44	1058.67	288.59	300.66	573.09	603.727	1077.98	1111.99
15277	15277	Hk2	22.3	20.16	23	26.77	26.05	26.44	44.35	40.24	45.38	53.49	52.45	53.19	2130	1926	2190	2450	2425	2451	21.82	26.42	43.3233	53.0433	2082	2442
30949	30949	Lcmt1	14.74	14.84	15.45	15.9	15.58	17.07	29.31	29.62	30.5	31.78	31.38	34.33	295	297	311	307	306	332	15.01	16.1833	29.81	32.4967	301	315
234686	234686	Fhod1	8.69	7.33	8.28	7.71	7.16	7.4	17.27	14.63	16.33	15.41	14.41	14.89	583	493	556	496	468	482	8.1	7.42333	16.0767	14.9033	544	482
75482	75482	Hspb9	0.44	0.29	1	0.15	0.44	0.15	0.87	0.59	1.98	0.3	0.88	0.3	3	2	7	1	3	1	0.576667	0.246667	1.14667	0.493333	4	1.66667
18007	18007	Neo1	24.69	24.65	26.75	24.19	24.01	24.65	49.09	49.19	52.78	48.35	48.34	49.58	3164	3163	3430	2971	2998	3066	25.3633	24.2833	50.3533	48.7567	3252.33	3011.67
20356	20356	Sema5a	2.54	4.07	2.22	5.37	5.89	5.7	5.05	8.13	4.38	10.74	11.85	11.47	480	778	421	986	1096	1058	2.94333	5.65333	5.85333	11.3533	559.667	1046.67
319387	319387	Adgrl3	1.13	1.65	1.43	3.27	2.9	3.47	2.25	3.29	2.81	6.53	5.84	6.97	178	258	221	463	441	501	1.40333	3.21333	2.78333	6.44667	219	468.333
17222	17222	Anapc1	33.33	34.06	34.25	42.73	43.31	44.71	66.29	67.98	67.58	85.38	87.21	89.92	4372	4346	4465	5232	5421	5499	33.88	43.5833	67.2833	87.5033	4394.33	5384
212391	212391	Lcor	2.19	2.26	2.12	2.69	2.52	2.76	4.36	4.51	4.19	5.38	5.08	5.55	507	490	500	609	579	619	2.19	2.65667	4.35333	5.33667	499	602.333
213262	213262	Fstl5	0	0	0.03	0	0.01	0	0	0	0.05	0	0.03	0	0	0	2	0	1	0	0.01	0.00333333	0.0166667	0.01	0.666667	0.333333
75766	75766	Dcstamp	0.04	0	0.05	0	0	0	0.08	0	0.09	0	0	0	1	0	1	0	0	0	0.03	0	0.0566667	0	0.666667	0
16508	16508	Kcnd2	0.17	0.37	0.13	0.06	0.12	0.16	0.35	0.74	0.26	0.11	0.25	0.32	16	34	12	5	11	14	0.223333	0.113333	0.45	0.226667	20.6667	10
66237	66237	Atp6v1g2	0.52	0.72	0.6	0.31	0.17	0.42	1.04	1.44	1.18	0.62	0.35	0.84	12.04	17	14.13	7.07	4.04	9	0.613333	0.3	1.22	0.603333	14.39	6.70333
74175	74175	Crct1	16.83	9.9	25.56	11.76	13.62	11.35	33.46	19.77	50.45	23.5	27.42	22.84	137	80	211	93	110	90	17.43	12.2433	34.56	24.5867	142.667	97.6667
17295	17295	Met	6.18	5.27	6.37	11	10.67	11.05	12.28	10.51	12.58	21.98	21.49	22.23	713	551	737	1181	1153	1194	5.94	10.9067	11.79	21.9	667	1176
232798	232798	Leng8	29.05	30.81	30.09	29.81	27.47	28.88	57.77	61.49	59.38	59.56	55.31	58.09	2269	2435	2345	2308	2157	2241	29.9833	28.72	59.5467	57.6533	2349.67	2235.33
75425	75425	Tti1	7.59	7.84	7.26	8.97	9.51	9.41	15.1	15.65	14.33	17.93	19.15	18.93	489	504	453	551	604	578	7.56333	9.29667	15.0267	18.67	482	577.667
67959	67959	Puf60	61.23	59.02	61.08	65.22	64.39	61.14	121.75	117.8	120.54	130.34	129.64	122.98	1794	1724	1798	1837	1845	1742	60.4433	63.5833	120.03	127.653	1772	1808
71772	71772	Plbd2	37.9	43.04	39.71	29.87	30.37	29.4	75.36	85.91	78.36	59.69	61.15	59.13	2296	2609	2409	1735	1795	1729	40.2167	29.88	79.8767	59.99	2438	1753
12476	12476	Cd151	52.35	48.58	57.52	35.58	36.92	36.98	104.11	96.96	113.52	71.11	74.33	74.38	1489	1383	1648	964	1019	1020	52.8167	36.4933	104.863	73.2733	1506.67	1001
72355	72355	Cdpf1	6.81	6.85	7.23	8.29	10.81	8.18	13.54	13.66	14.26	16.57	21.77	16.46	91	91	97	106	140	105	6.96333	9.09333	13.82	18.2667	93	117
319478	319478	Cxxc4	0.04	0.02	0.12	0.2	0.19	0.15	0.08	0.04	0.24	0.41	0.38	0.3	15	7	31	49.96	39	28	0.06	0.18	0.12	0.363333	17.6667	38.9867
66044	66044	Dtd1	5.85	6.25	5.28	5.91	6.52	6.53	11.64	12.47	10.42	11.8	13.12	13.12	108	115	98	105	118	117	5.79333	6.32	11.51	12.68	107	113.333
215751	215751	Ginm1	48.62	53.69	44.51	31.79	36.1	38.4	96.69	107.17	87.84	63.52	72.69	77.24	1062	1169	968	674	780	802	48.94	35.43	97.2333	71.15	1066.33	752
70426	70426	Tekt5	0.04	0	0	0	0	0	0.07	0	0	0	0	0	1	0	0	0	0	0	0.0133333	0	0.0233333	0	0.333333	0
227102	227102	Ormdl1	11.11	12.62	11.04	9.64	10	11.01	22.1	25.19	21.78	19.27	20.14	22.15	319	362	318	266	281	307	11.59	10.2167	23.0233	20.52	333	284.667
224694	224694	Zfp81	2.47	2.75	2.68	3.41	3.49	3.57	4.91	5.49	5.29	6.81	7.03	7.18	182	201	183	208	205	214	2.63333	3.49	5.23	7.00667	188.667	209
67393	67393	Cxxc5	11.81	9.91	12.59	4.77	5.55	5.79	23.48	19.79	24.85	9.53	11.18	11.66	444.72	371.38	484.08	180.76	209.37	214.84	11.4367	5.37	22.7067	10.79	433.393	201.657
217980	217980	Larp4b	19.23	19.09	19.37	21.13	20.67	21.68	38.25	38.1	38.22	42.23	41.62	43.61	2046.94	2037	2069	2162.1	2157	2259.32	19.23	21.16	38.19	42.4867	2050.98	2192.81
68115	68115	Maip1	5.35	4.99	4.5	6.25	5.73	6.75	10.64	9.97	8.88	12.49	11.53	13.57	324.66	303.35	273.61	363.81	339.09	397.42	4.94667	6.24333	9.83	12.53	300.54	366.773
225362	225362	Reep2	2.32	3.05	2.08	0.9	1.02	0.58	4.61	6.09	4.11	1.8	2.05	1.17	70	92	63	26	30	17	2.48333	0.833333	4.93667	1.67333	75	24.3333
321019	321019	Gpr183	0	0.06	0.25	0.13	0.08	0.11	0	0.12	0.49	0.26	0.17	0.21	0	3	12	6	4	5	0.103333	0.106667	0.203333	0.213333	5	5
235584	235584	Dusp7	15.54	13.55	14.02	9.82	10.01	10.13	30.9	27.05	27.67	19.62	20.17	20.37	833	727	753	505	524	527	14.37	9.98667	28.54	20.0533	771	518.667
225283	225283	Rprd1a	9.2	10.68	11.07	11.82	11.65	9.76	18.3	21.32	21.85	23.63	23.45	19.63	560	590	580	603	594	600	10.3167	11.0767	20.49	22.2367	576.667	599
381236	381236	Lipo3	7.64	8.09	7.38	8.51	7.82	7.4	15.19	16.14	14.56	17	15.75	14.89	345.69	373.47	335.73	384.55	351.91	333.79	7.70333	7.91	15.2967	15.88	351.63	356.75
73942	73942	Fam151b	1.78	1.88	1.86	1.08	1.46	1.27	3.53	3.75	3.68	2.15	2.94	2.55	36	38	38	21	29	25	1.84	1.27	3.65333	2.54667	37.3333	25
66691	66691	Gapvd1	21.45	22.28	20.59	21.67	21.17	21.57	42.67	44.48	40.63	43.31	42.63	43.39	2539	2640	2436	2446	2433	2473	21.44	21.47	42.5933	43.11	2538.33	2450.67
56471	56471	Stmn4	0.05	0.21	0.21	0.1	0.15	0.05	0.1	0.42	0.41	0.2	0.31	0.11	1	4	4	2	3	1	0.156667	0.1	0.31	0.206667	3	2
218035	218035	Vps41	35.15	37.03	33.23	33.49	33.92	33.45	69.9	73.9	65.58	66.93	68.3	67.28	1875	1976	1776	1714	1768	1735	35.1367	33.62	69.7933	67.5033	1875.67	1739
20541	20541	Slc8a1	1.94	2.92	2.71	2.11	2.45	1.98	3.86	5.84	5.34	4.22	4.93	3.99	411	553	472	385	407	403	2.52333	2.18	5.01333	4.38	478.667	398.333
13016	13016	Ctbp1	78.39	71.89	78.52	85.66	84.24	81.27	155.88	143.49	154.95	171.18	169.62	163.47	3129	2874	3144	3281	3278	3144	76.2667	83.7233	151.44	168.09	3049	3234.33
67230	67230	Zfp329	3.48	3.59	3.17	2.06	2.48	2.27	6.93	7.17	6.26	4.12	4.99	4.57	415.2	442	405.93	248	292	282	3.41333	2.27	6.78667	4.56	421.043	274
66612	66612	Ormdl3	28.78	33.03	29.22	17.7	16.94	16.74	57.23	65.92	57.66	35.37	34.11	33.67	919	1054	936	543	529	519	30.3433	17.1267	60.27	34.3833	969.667	530.333
19063	19063	Ppt1	46.16	47.71	44.79	30.9	28.94	30.65	91.79	95.23	88.38	61.74	58.28	61.65	1869	1932	1818	1201	1145	1205	46.22	30.1633	91.8	60.5567	1873	1183.67
74142	74142	Lonp1	73.73	89.55	61.62	91.8	92.55	86.43	146.62	178.74	121.59	183.45	186.36	173.84	3622	4401	3033	4327	4439	4122	74.9667	90.26	148.983	181.217	3685.33	4296
216443	216443	Mars	49.09	49.4	47.16	59.72	57.24	56.56	97.61	98.61	93.05	119.35	115.26	113.76	2422	2456	2337	2821	2767	2717	48.55	57.84	96.4233	116.123	2405	2768.33
70354	70354	Secisbp2l	17.1	19.04	17.15	13.77	13.78	13.33	34.01	38	33.84	27.52	27.75	26.82	1981	2217	1969	1508	1523	1518	17.7633	13.6267	35.2833	27.3633	2055.67	1516.33
242418	242418	Dcaf10	5.47	5.19	5.03	4.44	4.69	4.7	10.87	10.36	9.92	8.87	9.43	9.45	696	663	638	541	579	578	5.23	4.61	10.3833	9.25	665.667	566
234344	234344	Naf1	10.09	7.81	9.19	12.1	12.43	12.02	20.07	15.58	18.13	24.17	25.02	24.17	500	387	456	575	601	578	9.03	12.1833	17.9267	24.4533	447.667	584.667
12914	12914	Crebbp	6.21	6.23	6.19	6.52	6.34	6.26	12.36	12.43	12.22	13.04	12.76	12.59	970	957	975	953	954	933	6.21	6.37333	12.3367	12.7967	967.333	946.667
216134	216134	Pdxk	7.68	9.09	8.62	6.22	6.92	6.39	15.28	18.15	17.01	12.43	13.94	12.85	675	800	758	524	593	545	8.46333	6.51	16.8133	13.0733	744.333	554
100041574	100041574	9030025P20Rik	3.19	3.61	3.51	2.87	2.62	2.01	6.34	7.2	6.92	5.74	5.28	4.04	102.49	115.6	113.21	88.54	82.69	60.05	3.43667	2.5	6.82	5.02	110.433	77.0933
380969	380969	Nckap5l	5.87	6.21	6.38	4.51	4.12	4.31	11.68	12.4	12.6	9.01	8.3	8.67	492	522	538	362	337	352	6.15333	4.31333	12.2267	8.66	517.333	350.333
12955	12955	Cryab	131	111.48	130.94	54.73	50.37	52.64	260.5	222.51	258.39	109.37	101.42	105.87	1606	1376	1615.79	641	602	620	124.473	52.58	247.133	105.553	1532.6	621
70481	70481	Pnma1	0.34	0.5	0.29	0.33	0.27	0.16	0.68	1	0.57	0.66	0.54	0.33	13	19	11	12	10	6	0.376667	0.253333	0.75	0.51	14.3333	9.33333
93747	93747	Echs1	32.4	37.76	31.98	29.96	30.87	30.41	64.42	75.37	63.1	59.88	62.16	61.17	727	846	721	647	679	663	34.0467	30.4133	67.63	61.07	764.667	663
231214	231214	Cc2d2a	5.33	5.79	5.25	5.96	5.91	6.52	10.6	11.56	10.36	11.91	11.9	13.11	492	531	485	526	530	582	5.45667	6.13	10.84	12.3067	502.667	546
231769	231769	Sfswap	16.15	16.52	17.64	22.63	20.91	21.14	32.12	32.97	34.8	45.23	42.1	42.51	1087	1154	1194	1546	1506	1486	16.77	21.56	33.2967	43.28	1145	1512.67
243725	243725	Ppp1r9a	0.65	0.74	0.56	0.48	0.5	0.43	1.3	1.49	1.11	0.96	1.01	0.86	135.4	146.45	119.89	103.75	108.15	95.27	0.65	0.47	1.3	0.943333	133.913	102.39
243961	243961	Shank1	0.07	0.07	0.02	0.01	0.02	0.01	0.13	0.13	0.03	0.02	0.05	0.02	10	9	2	1	3	1	0.0533333	0.0133333	0.0966667	0.03	7	1.66667
226098	226098	Hectd2	3.48	3.88	2.71	3.37	3.65	3.45	6.92	7.75	5.34	6.74	7.34	6.94	279	320	217	250	283	280	3.35667	3.49	6.67	7.00667	272	271
231727	231727	B3gnt4	0.21	0.37	0.19	0.11	0.27	0.2	0.42	0.74	0.37	0.22	0.54	0.4	5	8.01	5.05	2.01	5	4.01	0.256667	0.193333	0.51	0.386667	6.02	3.67333
18441	18441	P2ry1	0.33	0.41	0.6	0.1	0.13	0.1	0.65	0.82	1.19	0.2	0.27	0.2	21	25	40	6	8	6	0.446667	0.11	0.886667	0.223333	28.6667	6.66667
269401	269401	Zfp512b	13.3	14.57	13.81	16.17	14.86	15.78	26.46	29.08	27.25	32.32	29.93	31.74	1144	1223	1193	1274	1201	1282	13.8933	15.6033	27.5967	31.33	1186.67	1252.33
104086	104086	Cyp27a1	0.63	1.25	0.93	0.56	0.46	1.03	1.25	2.5	1.83	1.12	0.92	2.08	20	39	30	17	14	31	0.936667	0.683333	1.86	1.37333	29.6667	20.6667
246103	246103	Atxn7	4.54	4.84	4.41	4.85	5.1	5.03	9.03	9.67	8.71	9.7	10.26	10.12	547	582	532	552	599	571	4.59667	4.99333	9.13667	10.0267	553.667	574
14407	14407	Gabrg3	0.02	0.02	0.01	0.03	0.03	0.01	0.05	0.05	0.02	0.06	0.06	0.01	4	4	2	5	5	1	0.0166667	0.0233333	0.04	0.0433333	3.33333	3.66667
12531	12531	Cdc25b	7.2	6.74	8.45	8.29	7.77	8.01	14.33	13.46	16.68	16.57	15.64	16.12	365	343	429	403	385	395	7.46333	8.02333	14.8233	16.11	379	394.333
225339	225339	Ammecr1l	22.14	23.51	20.29	17.71	16.56	18	44.02	46.93	40.03	35.38	33.33	36.21	1823	1950	1680	1407	1343	1443	21.98	17.4233	43.66	34.9733	1817.67	1397.67
64378	64378	Gpr88	0.26	0.35	0.21	0.11	0.14	0.07	0.52	0.69	0.41	0.22	0.29	0.14	15	20	12	6	8	4	0.273333	0.106667	0.54	0.216667	15.6667	6
19384	19384	Ran	249.21	221.16	255.46	299.15	308.14	301.12	495.59	441.43	504.11	597.82	620.44	605.66	9155	8123	9411	10552	11064	10740	241.943	302.803	480.377	607.973	8896.33	10785.3
12858	12858	Cox5a	194.43	190.47	203.91	206.85	191.04	190.32	386.66	380.17	402.39	413.36	384.67	382.81	1500	1459	1598	1550	1464	1430	196.27	196.07	389.74	393.613	1519	1481.33
72258	72258	Kcnk10	0.24	0.14	0.48	0.29	0.23	0.36	0.47	0.28	0.95	0.58	0.47	0.72	24	17	39	24	29	25	0.286667	0.293333	0.566667	0.59	26.6667	26
218138	218138	Gmds	9.46	11.51	10.73	9.74	10.91	11	18.8	22.97	21.18	19.45	21.96	22.14	213	259	243	211	241	241	10.5667	10.55	20.9833	21.1833	238.333	231
14156	14156	Fen1	16.5	14.43	17.48	26.78	23.65	25.18	32.8	28.8	34.5	53.51	47.63	50.65	606	528	642	937	841	892	16.1367	25.2033	32.0333	50.5967	592	890
67916	67916	Plpp3	38.86	36.18	47.14	43.32	43.76	41.22	77.27	72.22	93.03	86.56	88.11	82.91	2047	1907	2488	2189	2250	2108	40.7267	42.7667	80.84	85.86	2147.33	2182.33
100042698	100042698	Gm3973	0.63	0.2	1.06	0.61	1.72	0.95	1.26	0.4	2.09	1.22	3.46	1.92	11	2.1	17.46	7.07	25.99	14.26	0.63	1.09333	1.25	2.2	10.1867	15.7733
56199	56199	Abcb10	13.91	11.89	15.47	13.37	13.21	13.21	27.67	23.73	30.53	26.71	26.6	26.58	979	782	1048	913	920	895	13.7567	13.2633	27.31	26.63	936.333	909.333
230996	230996	9430015G10Rik	5.14	5.31	4.82	7.29	7.1	7.68	10.22	10.6	9.52	14.56	14.3	15.45	214	227	204	293	291	315	5.09	7.35667	10.1133	14.77	215	299.667
52874	52874	Pum3	28.26	25.88	29.41	36	36.43	37.22	56.2	51.65	58.03	71.95	73.35	74.87	1691	1552	1763	2068	2129	2163	27.85	36.55	55.2933	73.39	1668.67	2120
67015	67015	Ccdc91	9.53	10.77	8.99	10.52	10.37	10.41	18.96	21.51	17.74	21.02	20.88	20.95	380	430	360	403	404	404	9.76333	10.4333	19.4033	20.95	390	403.667
231915	231915	Uspl1	11.12	10.59	10.99	8.62	8.57	9.54	22.11	21.14	21.68	17.23	17.25	19.19	667	629	655	497	500	550	10.9	8.91	21.6433	17.89	650.333	515.667
20399	20399	Sh2b1	15.88	16.59	15.61	15.23	14.77	14.03	31.59	33.11	30.8	30.43	29.74	28.22	894	942	905	808	796	779	16.0267	14.6767	31.8333	29.4633	913.667	794.333
68614	68614	Letmd1	9.62	9.28	8.26	8.13	9.47	8.82	19.12	18.53	16.29	16.25	19.07	17.74	426	402	352	332	385	363	9.05333	8.80667	17.98	17.6867	393.333	360
13713	13713	Elk3	32.53	29.94	32.2	32.25	33.46	34.4	64.7	59.76	63.53	64.45	67.37	69.19	2321	2138	2304	2212	2322	2380	31.5567	33.37	62.6633	67.0033	2254.33	2304.67
12904	12904	Crabp2	26.67	35.12	16.05	21.45	21.02	17.47	53.03	70.1	31.68	42.86	42.33	35.14	306	401	186	238	238	195	25.9467	19.98	51.6033	40.11	297.667	223.667
14269	14269	Fnbp1	14.3	17.86	15.83	15.78	15.33	15.37	28.44	35.64	31.25	31.54	30.86	30.91	1321	1600	1434	1426	1413	1487	15.9967	15.4933	31.7767	31.1033	1451.67	1442
19878	19878	Rock2	92.69	75.75	89.68	72.94	72.53	77.77	184.33	151.19	176.98	145.77	146.05	156.44	12327	10075	11916	9258	9433	10004	86.04	74.4133	170.833	149.42	11439.3	9565
12801	12801	Cnr1	0.99	1.24	0.79	1.7	1.68	1.74	1.96	2.47	1.56	3.4	3.39	3.51	100	128	83	165	174	180	1.00667	1.70667	1.99667	3.43333	103.667	173
217830	217830	Dglucy	8.74	8.22	10.44	7.23	7.43	6.6	17.39	16.41	20.6	14.44	14.96	13.27	473	433	570	373	399	347	9.13333	7.08667	18.1333	14.2233	492	373
114602	114602	Zmynd10	0.09	0.08	0.11	0.08	0.1	0.09	0.17	0.16	0.21	0.16	0.21	0.18	3	3	4	3	4	2	0.0933333	0.09	0.18	0.183333	3.33333	3
71767	71767	Tysnd1	11.91	11.3	12.08	12.25	12.83	10.88	23.69	22.55	23.83	24.48	25.83	21.88	436	414	443	431	460	387	11.7633	11.9867	23.3567	24.0633	431	426
74015	74015	Fcho1	0.06	0.04	0.06	0.04	0.16	0.16	0.12	0.08	0.12	0.08	0.31	0.32	3	2	3	2	8	8	0.0533333	0.12	0.106667	0.236667	2.66667	6
240239	240239	Gpr151	0.04	0.04	0.11	0	0	0	0.07	0.07	0.22	0	0	0	1	1	3	0	0	0	0.0633333	0	0.12	0	1.66667	0
71751	71751	Map3k13	0.2	0.33	0.28	0.23	0.3	0.19	0.41	0.66	0.56	0.46	0.6	0.39	32	49	41	34	40	29	0.27	0.24	0.543333	0.483333	40.6667	34.3333
13998	13998	Fgd6	2.44	2.38	2.66	2.53	2.38	2.12	4.85	4.75	5.25	5.05	4.8	4.27	318	308	346	290	276	266	2.49333	2.34333	4.95	4.70667	324	277.333
76813	76813	Armc6	6.88	5.6	6.82	6.76	6.76	6.07	13.69	11.18	13.46	13.51	13.62	12.22	241.6	199.81	240.1	229.57	232.98	208.1	6.43333	6.53	12.7767	13.1167	227.17	223.55
20907	20907	Stx1a	4.44	4.78	5.16	5.64	5.94	5.34	8.84	9.55	10.17	11.27	11.95	10.75	147	146	165	171	178	167	4.79333	5.64	9.52	11.3233	152.667	172
26451	26451	Rpl27a	460.07	471.72	472.08	491.56	486.68	480.41	914.92	941.54	931.58	982.33	979.93	966.3	7056	7211	7292	7272	7339	7162	467.957	486.217	929.347	976.187	7186.33	7257.67
332579	332579	Card9	1.15	2.07	2.14	0	0	0.09	2.29	4.13	4.23	0	0	0.18	29	50	56	0	0	2	1.78667	0.03	3.55	0.06	45	0.666667
319636	319636	Fsd1l	1.5	1.47	1.36	1.49	1.49	1.22	2.99	2.93	2.69	2.99	2.99	2.46	195	195	170	185	192	157	1.44333	1.4	2.87	2.81333	186.667	178
12617	12617	Cenpc1	12.25	14.39	12.44	13.93	13.29	13.92	24.37	28.73	24.56	27.85	26.75	28	673.25	791.33	685.29	729.85	704.77	738.53	13.0267	13.7133	25.8867	27.5333	716.623	724.383
238057	238057	Gdf7	0.48	0.43	0.33	0.15	0.05	0.15	0.95	0.86	0.65	0.3	0.1	0.3	10	9	7	3	1	3	0.413333	0.116667	0.82	0.233333	8.66667	2.33333
328561	328561	Apol10b	0.13	0.03	0.26	0.2	0.33	0.49	0.25	0.06	0.5	0.4	0.66	0.99	4	1	8	6	10	15	0.14	0.34	0.27	0.683333	4.33333	10.3333
16870	16870	Lhx2	0.54	0.55	0.39	0.78	0.53	0.37	1.07	1.1	0.77	1.56	1.07	0.74	20	18	14	23	19	13	0.493333	0.56	0.98	1.12333	17.3333	18.3333
227960	227960	Gca	1	1.16	1.11	0.36	0.47	0.58	1.99	2.32	2.19	0.72	0.94	1.17	54.98	63.95	60.98	19	24.98	31	1.09	0.47	2.16667	0.943333	59.97	24.9933
76633	76633	Lrmda	1.31	1.59	1.65	0.66	0.43	0.62	2.61	3.18	3.25	1.31	0.87	1.24	23	25	25	11	5	7	1.51667	0.57	3.01333	1.14	24.3333	7.66667
18037	18037	Nfkbie	2.63	3.22	3.46	1.16	0.96	1.02	5.24	6.42	6.83	2.32	1.94	2.06	104	127	137	44	37	39	3.10333	1.04667	6.16333	2.10667	122.667	40
102631730	102631730	4930512M02Rik	0.6	0.84	0.35	0.37	0.72	0.49	1.19	1.69	0.7	0.74	1.46	0.99	5	7.01	3	3	6	4	0.596667	0.526667	1.19333	1.06333	5.00333	4.33333
320869	320869	Spata33	0.46	1.78	1.25	0.62	0.67	0.25	0.91	3.55	2.46	1.25	1.35	0.51	22	34	42	10	15	12	1.16333	0.513333	2.30667	1.03667	32.6667	12.3333
75764	75764	Slx1b	1.2	1.91	1.62	0.98	0.82	1.24	2.38	3.81	3.2	1.96	1.65	2.5	74.61	118.98	101.07	58.49	49.75	75.17	1.57667	1.01333	3.13	2.03667	98.22	61.1367
76800	76800	Usp42	5.99	5.71	6.12	5.97	6.07	6.44	11.9	11.39	12.08	11.94	12.22	12.96	533	508	545	510	526	556	5.94	6.16	11.79	12.3733	528.667	530.667
66990	66990	Tmem134	22.95	22.34	24.96	19.74	20.84	17.92	45.63	44.6	49.26	39.45	41.95	36.04	509	496	558	422	456	386	23.4167	19.5	46.4967	39.1467	521	421.333
28106	28106	Mydgf	80.09	78.17	81.47	74.44	77.38	72.25	159.26	156.02	160.78	148.76	155.81	145.32	937.96	910.99	963.26	842.96	893.96	822.98	79.91	74.69	158.687	149.963	937.403	853.3
94063	94063	Mrpl16	21.35	18.42	19.06	20.03	21.53	20.27	42.46	36.77	37.61	40.03	43.34	40.76	336	289	302	304	333	310	19.61	20.61	38.9467	41.3767	309	315.667
18548	18548	Pcsk1	0.19	0.11	0.07	0.04	0.01	0.01	0.38	0.21	0.14	0.07	0.02	0.02	16	9	6	3	1	1	0.123333	0.02	0.243333	0.0366667	10.3333	1.66667
234407	234407	Colgalt1	86.11	90.69	81.83	81.17	80.96	81.91	171.24	181.02	161.47	162.22	163.02	164.75	4546.76	4796.21	4335.88	4115.79	4174.28	4202.12	86.21	81.3467	171.243	163.33	4559.62	4164.06
13392	13392	Dlx2	2.42	0.7	2.63	2.41	2.07	2.18	4.81	1.39	5.2	4.82	4.16	4.39	97	28	106	93	81	85	1.91667	2.22	3.8	4.45667	77	86.3333
54208	54208	Arl6ip1	90.19	87.11	98.34	71.65	70.21	73.3	179.36	173.86	194.06	143.19	141.37	147.43	3064	2958	3351	2338	2332	2418	91.88	71.72	182.427	143.997	3124.33	2362.67
236193	236193	Zfp709	2.24	2.38	2.15	1.34	1.94	1.85	4.45	4.76	4.23	2.69	3.92	3.72	151	161	145	87	128	121	2.25667	1.71	4.48	3.44333	152.333	112
110750	110750	Cse1l	41.56	34.18	43.77	51.42	51.32	53.49	82.65	68.22	86.36	102.76	103.34	107.58	2524	2077	2662	2995	3041	3153	39.8367	52.0767	79.0767	104.56	2421	3063
74103	74103	Nebl	0.12	0.1	0.12	0.08	0.1	0.14	0.25	0.19	0.23	0.15	0.2	0.28	17	16	15	9	14	18	0.113333	0.106667	0.223333	0.21	16	13.6667
28064	28064	Yipf3	35.05	37.66	34.51	28.91	29.61	29.47	69.71	75.16	68.1	57.78	59.62	59.27	1127	1210	1113	893	931	920	35.74	29.33	70.99	58.89	1150	914.667
103149	103149	Upb1	0.02	0	0.04	0	0	0	0.04	0	0.08	0	0	0	1	0	2	0	0	0	0.02	0	0.04	0	1	0
223433	223433	Otulinl	2.76	4.61	4.64	1.67	1.39	1.49	5.49	9.2	9.16	3.33	2.81	3	136	226	230	79	67	71	4.00333	1.51667	7.95	3.04667	197.333	72.3333
108075	108075	Ltbp4	3.22	3.78	4.59	7.22	7.11	7.06	6.41	7.54	9.06	14.43	14.32	14.2	276	328	399	604	600	589	3.86333	7.13	7.67	14.3167	334.333	597.667
56228	56228	Ube2j1	53.76	48.45	52.51	49.45	49.21	50.05	106.91	96.71	103.63	98.81	99.09	100.67	3201	2885	3138	2833	2866	2900	51.5733	49.57	102.417	99.5233	3074.67	2866.33
269643	269643	Ppp2r2c	0	0	0.01	0	0	0.02	0	0	0.03	0	0	0.03	0	0	1	0	0	1	0.00333333	0.00666667	0.01	0.01	0.333333	0.333333
223775	223775	Pim3	8.58	7.25	8.94	15.49	15.87	14.76	17.07	14.48	17.65	30.95	31.95	29.69	335.96	283.97	350.94	582	606.98	560.98	8.25667	15.3733	16.4	30.8633	323.623	583.32
108168373	108168373	Gm46617	0.05	0.1	0.19	0	0.15	0.1	0.09	0.19	0.37	0	0.29	0.2	1	2	4	0	3	2	0.113333	0.0833333	0.216667	0.163333	2.33333	1.66667
230376	230376	Haus6	8.95	8.05	9.81	13.82	13.55	14.89	17.8	16.06	19.36	27.61	27.29	29.96	800	688	874	1156	1197	1248	8.93667	14.0867	17.74	28.2867	787.333	1200.33
66587	66587	Fastk	24.54	28.65	25.09	27.51	26.71	27.38	48.81	57.19	49.51	54.97	53.78	55.07	739	854	759	789	779	790	26.0933	27.2	51.8367	54.6067	784	786
117590	117590	Asb10	0.03	0	0	0	0	0	0.06	0	0	0	0	0	1	0	0	0	0	0	0.01	0	0.02	0	0.333333	0
22751	22751	Zfp90	4	4.07	4.53	3.42	3.74	3.96	7.95	8.12	8.94	6.83	7.53	7.96	212	215	241	182	194	210	4.2	3.70667	8.33667	7.44	222.667	195.333
13418	13418	Dnajc1	12.15	14.59	12.06	10.27	10.29	10.04	24.16	29.13	23.8	20.53	20.73	20.19	1036.27	1205.31	1013.02	818.24	828.16	835.88	12.9333	10.2	25.6967	20.4833	1084.87	827.427
105245043	105245043	LOC105245043	0	0	0	0	0.03	0	0	0	0	0	0.06	0	0	0	0	0	2	0	0	0.01	0	0.02	0	0.666667
72709	72709	C1qtnf6	9.12	13.12	10.41	8.46	8.29	7.86	18.13	26.19	20.54	16.91	16.68	15.81	354	508	404	316	315	297	10.8833	8.20333	21.62	16.4667	422	309.333
102638120	102638120	Gm34758	0.01	0.06	0.07	0.04	0	0	0.03	0.12	0.14	0.08	0	0	1	4	5	2	0	0	0.0466667	0.0133333	0.0966667	0.0266667	3.33333	0.666667
54156	54156	Egfl6	2.71	4.99	2.89	6.9	6.38	6.86	5.39	9.96	5.69	13.78	12.86	13.81	120	221	128	293	276	295	3.53	6.71333	7.01333	13.4833	156.333	288
217351	217351	Tnrc6c	6.86	7.09	6.84	6.47	6.73	6.65	13.64	14.15	13.49	12.93	13.55	13.37	1055	1081	1040	946	1004	983	6.93	6.61667	13.76	13.2833	1058.67	977.667
16664	16664	Krt14	0.2	0	0	0.05	0	0	0.39	0	0	0.09	0	0	5	0	0	1	0	0	0.0666667	0.0166667	0.13	0.03	1.66667	0.333333
18596	18596	Pdgfrb	70.73	83.89	67.53	49.4	48.54	47.27	140.66	167.44	133.26	98.72	97.73	95.07	6522	7760	6227	4353	4320	4243	74.05	48.4033	147.12	97.1733	6836.33	4305.33
14672	14672	Gna11	42.39	38.23	41.77	42.96	44.61	42.71	84.3	76.3	82.43	85.86	89.83	85.9	2406	2171	2375	2339	2471	2353	40.7967	43.4267	81.01	87.1967	2317.33	2387.67
56403	56403	Syncrip	92.79	87.92	91.04	106.61	103.57	108.13	184.52	175.49	179.66	213.04	208.54	217.49	6226	5851	6072	6910	7051	7100	90.5833	106.103	179.89	213.023	6049.67	7020.33
18537	18537	Pcmt1	37.03	33.06	38.77	34.92	37.07	36.87	73.65	66	76.5	69.79	74.64	74.15	1503	1372	1533	1344	1460	1437	36.2867	36.2867	72.05	72.86	1469.33	1413.67
228019	228019	Mettl8	4.79	4.16	4.55	4.94	4.95	4.74	9.52	8.3	8.98	9.87	9.96	9.54	199.97	169.5	197.91	202.83	200.32	194.41	4.5	4.87667	8.93333	9.79	189.127	199.187
68724	68724	Arl8a	98.53	88.2	99.2	87.24	86.18	79.85	195.94	176.04	195.75	174.34	173.53	160.61	2570	2298	2598	2188	2201	2023	95.31	84.4233	189.243	169.493	2488.67	2137.33
219024	219024	Pip4p1	32.81	31.8	30.17	31.43	28.92	29.62	65.25	63.47	59.53	62.82	58.22	59.57	794	769	736	728	690	698	31.5933	29.99	62.75	60.2033	766.333	705.333
18164	18164	Nptx1	0.49	0.34	0.69	0.88	0.8	0.73	0.98	0.68	1.36	1.76	1.61	1.47	45	31	63	77	71	65	0.506667	0.803333	1.00667	1.61333	46.3333	71
22319	22319	Vamp3	73.26	66.62	75.11	67.69	70.7	68.76	145.68	132.97	148.22	135.26	142.35	138.31	2462	2238	2532	2185	2323	2244	71.6633	69.05	142.29	138.64	2410.67	2250.67
57312	57312	Mrps31	10.42	9.33	9.58	11.09	10.56	10.23	20.72	18.62	18.9	22.17	21.26	20.57	244	217	226	248	240	232	9.77667	10.6267	19.4133	21.3333	229	240
67399	67399	Pdlim7	117.34	108.92	112.39	141.02	149.06	135.07	233.35	217.41	221.79	281.82	300.13	271.68	2818	2593	2630	3363	3559	3253	112.883	141.717	224.183	284.543	2680.33	3391.67
102639132	102639132	Gm21885	0	0.05	0.02	0.02	0.04	0.02	0	0.11	0.04	0.04	0.07	0.04	0	3	1	1	2	1	0.0233333	0.0266667	0.05	0.05	1.33333	1.33333
66979	66979	Pole4	23.7	22.28	24.61	32.92	32.54	34.93	47.14	44.46	48.57	65.78	65.51	70.25	592	557	614	775	785	852	23.53	33.4633	46.7233	67.18	587.667	804
279561	279561	Wnk3	0.94	0.85	0.84	0.6	0.67	0.53	1.86	1.69	1.67	1.19	1.35	1.07	173	157	157	107	121	95	0.876667	0.6	1.74	1.20333	162.333	107.667
66727	66727	Plaat5	0.02	0	0	0.03	0	0.07	0.05	0	0	0.05	0	0.14	1	0	0	1	0	1	0.00666667	0.0333333	0.0166667	0.0633333	0.333333	0.666667
67089	67089	Psmc6	116.4	111.15	111.68	119.04	122.92	126.05	231.48	221.85	220.38	237.88	247.5	253.54	2747	2620	2646	2702	2841	2889	113.077	122.67	224.57	246.307	2671	2810.67
19262	19262	Ptpra	40.19	43.63	40.73	39.54	41.47	39.84	79.92	87.09	80.38	79.01	83.5	80.14	2368	2571.88	2402.8	2238	2386.48	2279	41.5167	40.2833	82.4633	80.8833	2447.56	2301.16
103534	103534	Mgat4b	34.91	30.57	34.37	22.46	23.73	23.18	69.43	61.01	67.82	44.88	47.79	46.62	1373	1202	1355	848	912	885	33.2833	23.1233	66.0867	46.43	1310	881.667
19338	19338	Rab33b	10.03	10.47	9.4	8.19	7.87	7.37	19.96	20.89	18.54	16.36	15.84	14.82	588.23	613.96	551.74	460.23	449.98	419.26	9.96667	7.81	19.7967	15.6733	584.643	443.157
108900	108900	Fam72a	1.46	1.31	1.9	2.81	2.33	3.48	2.9	2.61	3.76	5.62	4.7	7	32	29	41	55	46	70	1.55667	2.87333	3.09	5.77333	34	57
16995	16995	Ltb4r1	0.15	0.11	0.11	0.2	0.2	0.1	0.3	0.22	0.22	0.41	0.4	0.2	8	6	6	5	4	3	0.123333	0.166667	0.246667	0.336667	6.66667	4
96957	96957	Tmem62	2.9	3.21	2.93	2.58	2.4	2.24	5.76	6.4	5.79	5.16	4.83	4.51	137	147	139	113	102	103	3.01333	2.40667	5.98333	4.83333	141	106
319192	319192	H2ac19	0	2.71	1.33	0	2.72	2.72	0	5.42	2.63	0	5.49	5.47	0	15.94	8.06	0	16.17	15.75	1.34667	1.81333	2.68333	3.65333	8	10.64
72113	72113	Adck1	5.17	4.86	4.9	4.8	7.21	5.98	10.28	9.71	9.66	9.59	14.52	12.02	190	186	180	173	264	220	4.97667	5.99667	9.88333	12.0433	185.333	219
332359	332359	Tigd3	0.29	0.32	0.23	0.28	0.18	0.12	0.58	0.65	0.46	0.55	0.36	0.24	10	11	8	9	6	4	0.28	0.193333	0.563333	0.383333	9.66667	6.33333
71997	71997	Smg9	7.43	7.85	7.78	9.34	10.82	9.26	14.78	15.68	15.36	18.67	21.79	18.62	276	301	297.98	330	393	331.99	7.68667	9.80667	15.2733	19.6933	291.66	351.663
68016	68016	Cavin4	4.49	3.87	3.76	2.58	2.91	3.19	8.92	7.72	7.43	5.15	5.86	6.41	145	125	122	80	92	100	4.04	2.89333	8.02333	5.80667	130.667	90.6667
15944	15944	Irgm1	20.01	24.95	19.03	8.97	8.6	9.31	39.8	49.79	37.54	17.92	17.32	18.72	709	886	683	303	294	319	21.33	8.96	42.3767	17.9867	759.333	305.333
215627	215627	Zbtb8b	17.31	11.99	19.24	7.42	7.17	7.3	34.42	23.93	37.96	14.83	14.44	14.68	1324	918	1473	544	535	542	16.18	7.29667	32.1033	14.65	1238.33	540.333
78541	78541	Asb8	16.52	15.27	15.68	12.19	10.85	12.27	32.85	30.48	30.93	24.36	21.85	24.67	572	528	547	407	367	412	15.8233	11.77	31.42	23.6267	549	395.333
382864	382864	Colq	0	0.07	0.09	0	0.07	0.12	0	0.14	0.18	0	0.14	0.24	0	3	4	0	3	5	0.0533333	0.0633333	0.106667	0.126667	2.33333	2.66667
57778	57778	Fmnl1	1.8	2.77	2.8	0.15	0.13	0.07	3.57	5.53	5.52	0.3	0.26	0.13	114	176	177	9	8	4	2.45667	0.116667	4.87333	0.23	155.667	7
70510	70510	Rnf167	3.51	4.88	4.68	3.37	3.15	3.21	6.97	9.74	9.24	6.73	6.35	6.45	102.62	143.47	137.67	95.06	90	91.58	4.35667	3.24333	8.65	6.51	127.92	92.2133
108168376	108168376	Gm46620	29.13	29.05	29.64	27.23	29.08	26.62	57.92	57.99	58.49	54.42	58.56	53.55	2108.79	2082.03	2102.21	1876.28	2059.38	1894.23	29.2733	27.6433	58.1333	55.51	2097.68	1943.3
272009	272009	Srsf12	0.55	0.5	0.42	0.15	0.29	0.06	1.1	1	0.83	0.3	0.58	0.13	28	26	21	7	14	3	0.49	0.166667	0.976667	0.336667	25	8
56690	56690	Mlycd	6.78	6.59	5.45	4.61	4.86	4.84	13.48	13.14	10.76	9.22	9.78	9.74	216	218	182	149	156	156	6.27333	4.77	12.46	9.58	205.333	153.667
68922	68922	Dnaic1	0	0	0.02	0	0	0	0	0	0.05	0	0	0	0	0	1	0	0	0	0.00666667	0	0.0166667	0	0.333333	0
100045778	100045778	Rnf223	0.39	0.22	0.21	0.27	0.22	0.36	0.77	0.43	0.42	0.54	0.44	0.72	9	5	5	6	5	8	0.273333	0.283333	0.54	0.566667	6.33333	6.33333
14265	14265	Fmr1	28.23	32.2	26.04	32.18	32.56	33.72	56.14	64.28	51.39	64.3	65.56	67.82	2106	2403	1944	2300	2368	2441	28.8233	32.82	57.27	65.8933	2151	2369.67
78506	78506	Micu3	4.77	4.05	4.22	6.08	5.53	6.44	9.48	8.09	8.32	12.15	11.14	12.96	267	233	245	339	317	359	4.34667	6.01667	8.63	12.0833	248.333	338.333
14396	14396	Gabra3	0.15	0.11	0.06	0.09	0.02	0.02	0.29	0.23	0.13	0.17	0.03	0.03	9	7	4	5	1	1	0.106667	0.0433333	0.216667	0.0766667	6.66667	2.33333
12798	12798	Cnn2	495.73	448.55	483.02	529.36	537.13	534.63	985.82	895.28	953.17	1057.88	1081.52	1075.36	13653	12342	13354	14015	14479	14301	475.767	533.707	944.757	1071.59	13116.3	14265
13858	13858	Eps15	16.18	18.67	17.27	17.97	19.21	18.65	32.19	37.26	34.09	35.9	38.68	37.51	1426	1633	1514	1506	1616	1566	17.3733	18.61	34.5133	37.3633	1524.33	1562.67
103142	103142	Rdh9	0.18	0.18	0.07	0.12	0.23	0.09	0.36	0.36	0.13	0.24	0.47	0.19	8	8	3	5	10	4	0.143333	0.146667	0.283333	0.3	6.33333	6.33333
77929	77929	Yipf6	5.75	5.89	5.78	5.04	5.5	6.14	11.44	11.76	11.41	10.08	11.07	12.35	480	499	484	410	450	494	5.80667	5.56	11.5367	11.1667	487.667	451.333
242960	242960	Fbxl5	18.47	21.4	19.69	14.81	15.72	14.79	36.73	42.71	38.86	29.59	31.65	29.75	854	993	916	640	688	650	19.8533	15.1067	39.4333	30.33	921	659.333
67427	67427	Rps20	112.03	113.67	109.98	121.56	126.48	120.14	222.78	226.88	217.03	242.92	254.67	241.66	6481	6580	6373	6745	7140	6747	111.893	122.727	222.23	246.417	6478	6877.33
269209	269209	Stk36	0.92	1.27	0.96	0.7	0.61	0.81	1.83	2.53	1.9	1.39	1.22	1.63	84	116	88	61	54	72	1.05	0.706667	2.08667	1.41333	96	62.3333
50817	50817	Capn15	6.25	5.96	6.2	5.53	5.4	5.44	12.42	11.89	12.24	11.06	10.88	10.94	497	470	489	423	418	414	6.13667	5.45667	12.1833	10.96	485.333	418.333
66932	66932	Rexo1	8.86	8.68	9.14	11.89	11.71	11.7	17.61	17.33	18.03	23.76	23.57	23.54	814	796	842	1042	1045	1039	8.89333	11.7667	17.6567	23.6233	817.333	1042
58523	58523	Elp2	30.43	31.18	34.02	37.09	38.72	37.11	60.51	62.24	67.13	74.12	77.95	74.64	1394	1427	1563	1631	1731	1652	31.8767	37.64	63.2933	75.57	1461.33	1671.33
115488290	115488290	LOC115488290	3.7	3.88	4.72	2.43	2.33	2.17	7.35	7.75	9.32	4.85	4.69	4.37	129	135.47	165.27	81.31	79.44	73.7	4.1	2.31	8.14	4.63667	143.247	78.15
382083	382083	Snx22	0.55	0.8	0.63	0.65	0.54	0.54	1.1	1.6	1.23	1.3	1.09	1.09	22.98	33.36	26.09	26.08	22.01	21.91	0.66	0.576667	1.31	1.16	27.4767	23.3333
22704	22704	Zfp46	5.57	6.48	5.75	3.02	3.92	3.51	11.08	12.93	11.35	6.03	7.88	7.06	444	517	459	232	304	272	5.93333	3.48333	11.7867	6.99	473.333	269.333
102641157	102641157	Gm38538	0.25	0.54	0.38	0.6	0.48	0.55	0.51	1.09	0.75	1.19	0.97	1.11	4.37	9.35	6.61	9.88	8.13	9.23	0.39	0.543333	0.783333	1.09	6.77667	9.08
66525	66525	Timm50	36.07	36.5	39.29	48.8	50.21	49.43	71.73	72.85	77.53	97.53	101.1	99.43	666	659	733	853	900	871	37.2867	49.48	74.0367	99.3533	686	874.667
26372	26372	Clcn6	7.51	7.84	7.28	7.55	7.68	7.07	14.94	15.65	14.37	15.08	15.47	14.22	672	702	652	647	670	614	7.54333	7.43333	14.9867	14.9233	675.333	643.667
17156	17156	Man1a2	23.07	23.12	21.95	19.39	20.62	20.97	45.88	46.15	43.32	38.74	41.52	42.18	3225	3237	3070	2596	2808	2845	22.7133	20.3267	45.1167	40.8133	3177.33	2749.67
171180	171180	Syt12	1.88	1.81	1.93	0.7	1.14	0.71	3.74	3.61	3.81	1.41	2.3	1.44	103	99	106	37	61	38	1.87333	0.85	3.72	1.71667	102.667	45.3333
75645	75645	Ccdc172	0	0	0	0.07	0	0	0	0	0	0.14	0	0	0	0	0	1	0	0	0	0.0233333	0	0.0466667	0	0.333333
56150	56150	Mad2l1	29.62	23.66	30.04	32.35	34.05	34.31	58.9	47.22	59.28	64.65	68.57	69.02	776	623	795	843	894	903	27.7733	33.57	55.1333	67.4133	731.333	880
399599	399599	Ccdc87	0.08	0.09	0.04	0.04	0.08	0.04	0.15	0.19	0.07	0.08	0.16	0.08	4	5	2	2	4	2	0.07	0.0533333	0.136667	0.106667	3.66667	2.66667
100040608	100040608	Fancf	2.8	2.94	3.16	3.4	4.22	3.85	5.57	5.86	6.23	6.8	8.5	7.74	72.51	75.96	82.05	84.67	106.95	96.76	2.96667	3.82333	5.88667	7.68	76.84	96.1267
14783	14783	Grb10	137.63	132.98	140.59	140	142.71	143.51	273.71	265.43	277.43	279.78	287.34	288.66	12090	11692	12365	11784	12221	12237	137.067	142.073	272.19	285.26	12049	12080.7
71665	71665	Fuca1	33.46	35.06	34.52	21.58	20.9	21.61	66.53	69.98	68.11	43.12	42.09	43.46	1373	1439	1420	850	838	861	34.3467	21.3633	68.2067	42.89	1410.67	849.667
114128	114128	Laptm4b	33.44	32.65	31.37	28.02	29.73	28.49	66.5	65.17	61.91	55.99	59.86	57.31	991	967	933	798	862	820	32.4867	28.7467	64.5267	57.72	963.667	826.667
114229	114229	Kiss1r	0.16	0.27	0.26	0.18	0.19	0.11	0.31	0.54	0.52	0.36	0.39	0.23	8	19	16	11	10	7	0.23	0.16	0.456667	0.326667	14.3333	9.33333
231672	231672	Fbxw8	31.44	30.2	30.5	31.24	32.28	30.8	62.52	60.29	60.18	62.43	65	61.96	2696	2593	2618	2568	2699	2564	30.7133	31.44	60.9967	63.13	2635.67	2610.33
114714	114714	Rad51c	1.72	1.43	1.18	2.09	2.04	2.65	3.43	2.86	2.33	4.17	4.1	5.33	32	36	34	52	59	69	1.44333	2.26	2.87333	4.53333	34	60
22115	22115	Tssk2	0.05	0	0	0	0.05	0	0.1	0	0	0	0.1	0	1	0	0	0	1	0	0.0166667	0.0166667	0.0333333	0.0333333	0.333333	0.333333
320129	320129	Grk3	0.09	0.11	0.16	0.03	0.04	0.08	0.17	0.22	0.31	0.05	0.07	0.16	10	13	18	3	4	9	0.12	0.05	0.233333	0.0933333	13.6667	5.33333
53416	53416	Stk39	15.69	14.77	15.99	17.42	17.42	18.27	31.2	29.49	31.56	34.81	35.08	36.75	804	745	817	853	871	894	15.4833	17.7033	30.75	35.5467	788.667	872.667
245537	245537	Nlgn3	0.15	0.18	0.17	0.13	0.09	0.09	0.3	0.36	0.33	0.25	0.19	0.19	10	12	11	8	6	6	0.166667	0.103333	0.33	0.21	11	6.66667
66531	66531	Cmc2	6.19	5.34	6.07	6.5	7.17	6.67	12.32	10.66	11.98	12.99	14.44	13.41	132	115	130	134	150	138	5.86667	6.78	11.6533	13.6133	125.667	140.667
232811	232811	Kmt5c	4.29	5.43	5.18	3.15	3.8	3.22	8.53	10.83	10.23	6.29	7.65	6.47	190	231	228	135	155	136	4.96667	3.39	9.86333	6.80333	216.333	142
76832	76832	Hyls1	6.28	5.08	5.85	4.41	4.86	4.94	12.48	10.15	11.55	8.81	9.78	9.94	157	127	147	106	119	120	5.73667	4.73667	11.3933	9.51	143.667	115
217316	217316	Slc16a5	0.21	0.41	0.23	0.11	0.1	0.16	0.43	0.82	0.46	0.23	0.2	0.33	11	16	12	4	4	5	0.283333	0.123333	0.57	0.253333	13	4.33333
13813	13813	Eomes	0.51	0.31	0.41	0.25	0.16	0.28	1.02	0.61	0.82	0.51	0.33	0.56	32	19	26	15	10	17	0.41	0.23	0.816667	0.466667	25.6667	14
56418	56418	Ykt6	91.18	97.6	88.84	79.64	79.53	79.28	181.33	194.81	175.32	159.15	160.12	159.46	3664	3922	3579	3072	3122	3093	92.54	79.4833	183.82	159.577	3721.67	3095.67
16443	16443	Itsn1	23.99	26.42	24.59	28.89	27.14	27.59	47.71	52.72	48.52	57.73	54.65	55.5	2242	2482	2304	2592	2487	2513.04	25	27.8733	49.65	55.96	2342.67	2530.68
75570	75570	Nhej1	3.24	2.63	2.45	2.79	2.35	1.9	6.44	5.26	4.83	5.58	4.73	3.83	42	34	32	35	30	24	2.77333	2.34667	5.51	4.71333	36	29.6667
17064	17064	Cd93	3.95	5.09	6.1	0.33	0.37	0.26	7.85	10.16	12.04	0.67	0.75	0.52	458	591	708	37	42	29	5.04667	0.32	10.0167	0.646667	585.667	36
319508	319508	Syt15	0	0	0	0	0.02	0	0	0	0	0	0.03	0	0	0	0	0	1	0	0	0.00666667	0	0.01	0	0.333333
239364	239364	Tspyl5	0.68	1.03	0.57	0.18	0.23	0.35	1.34	2.05	1.13	0.37	0.45	0.7	46	70	39	12	15	23	0.76	0.253333	1.50667	0.506667	51.6667	16.6667
22032	22032	Traf4	20.75	17.64	21.66	18.1	16.81	16.8	41.26	35.21	42.75	36.17	33.85	33.8	1040	883	1090	871	822	820	20.0167	17.2367	39.74	34.6067	1004.33	837.667
14155	14155	Fem1b	17.64	17.84	16.35	12.23	12.45	13.31	35.09	35.61	32.27	24.44	25.07	26.77	2001	2026	1856	1329	1376	1465	17.2767	12.6633	34.3233	25.4267	1961	1390
18763	18763	Pkd1	16.95	19.39	17.58	16.42	16.12	15.48	33.7	38.7	34.69	32.81	32.45	31.14	4406.88	5044.76	4560.74	4073.85	4072.34	3877.98	17.9733	16.0067	35.6967	32.1333	4670.79	4008.06
67890	67890	Ufm1	18.9	17.58	16.44	16.81	17.66	16.39	37.59	35.1	32.44	33.59	35.56	32.97	1583	1474	1378	1349	1442	1332	17.64	16.9533	35.0433	34.04	1478.33	1374.33
12583	12583	Cdo1	24.15	33.62	21.19	17.03	17.19	16.78	48.03	67.11	41.82	34.02	34.61	33.74	630	876	555	427	439	425	26.32	17	52.32	34.1233	687	430.333
15930	15930	Ido1	0.12	0	0.08	0.05	0	0.14	0.24	0	0.16	0.09	0	0.28	3	0	2	1	0	3	0.0666667	0.0633333	0.133333	0.123333	1.66667	1.33333
100561	100561	Slc15a4	14.01	12.14	13.41	8.26	8.51	8.55	27.85	24.24	26.46	16.51	17.14	17.2	642	550	616	368	385	385	13.1867	8.44	26.1833	16.95	602.667	379.333
74574	74574	Lvrn	1.31	1.47	1.45	0.67	0.52	0.66	2.6	2.94	2.87	1.34	1.05	1.33	99	105	97	44	38	43	1.41	0.616667	2.80333	1.24	100.333	41.6667
13018	13018	Ctcf	19.93	21.4	19.57	23.47	23	24.62	39.64	42.71	38.62	46.91	46.31	49.51	1305	1404	1284	1472	1466	1559	20.3	23.6967	40.3233	47.5767	1331	1499
100040807	100040807	Gm2977	0.06	0	0	0	0	0	0.11	0	0	0	0	0	1.5	0	0	0	0	0	0.02	0	0.0366667	0	0.5	0
76279	76279	Cyp2d26	0	0	0	0	0	0.04	0	0	0	0	0	0.08	0	0	0	0	0	1	0	0.0133333	0	0.0266667	0	0.333333
13039	13039	Ctsl	692.67	776.48	752.01	604.02	597.3	593.06	1377.48	1549.83	1483.98	1207.07	1202.66	1192.88	17776	19857	19374	14853	14973	14746	740.387	598.127	1470.43	1200.87	19002.3	14857.3
326618	326618	Tpm4	790.34	767.02	801.13	804.94	795.26	800.3	1571.71	1530.94	1580.9	1608.6	1601.27	1609.72	26331	25543	26773	25760	25906	25891	786.163	800.167	1561.18	1606.53	26215.7	25852.3
14912	14912	Nkx6-2	0	0	0	0.11	0	0	0	0	0	0.22	0	0	0	0	0	2	0	0	0	0.0366667	0	0.0733333	0	0.666667
56504	56504	Srpk3	0	0.03	0.03	0.04	0.03	0.03	0	0.06	0.06	0.07	0.06	0.06	0	2	2	2	2	2	0.02	0.0333333	0.04	0.0633333	1.33333	2
73750	73750	Whrn	3.2	2.49	2.63	3.49	3.44	3.33	6.37	4.97	5.19	6.98	6.92	6.7	216	171	182	227	229	222	2.77333	3.42	5.51	6.86667	189.667	226
58178	58178	Sorcs1	0.82	1.52	1.08	0.2	0.17	0.18	1.62	3.03	2.13	0.4	0.33	0.37	84	153	113	25	16	20	1.14	0.183333	2.26	0.366667	116.667	20.3333
18127	18127	Nos3	0	0.01	0.01	0.02	0.06	0.01	0	0.03	0.03	0.03	0.12	0.03	0	1	1	1	4	1	0.00666667	0.03	0.02	0.06	0.666667	2
67760	67760	Slc38a2	89.95	85.95	83.57	86.05	86.93	88.62	178.88	171.54	164.91	171.96	175.04	178.25	7185	6866	6680	6582	6762	6865	86.49	87.2	171.777	175.083	6910.33	6736.33
227731	227731	Slc25a25	8.22	7.52	9.3	12.63	12.47	10.85	16.35	15	18.36	25.23	25.1	21.83	450.23	416.58	517.4	663.26	661.09	577.42	8.34667	11.9833	16.57	24.0533	461.403	633.923
70110	70110	Ifi35	9.62	11.26	10.22	8.32	10.01	11.77	19.13	22.46	20.17	16.62	20.16	23.67	191	223	204	159	195	227	10.3667	10.0333	20.5867	20.15	206	193.667
435845	435845	Tmprss11c	0.04	0	0	0	0	0	0.08	0	0	0	0	0	1	0	0	0	0	0	0.0133333	0	0.0266667	0	0.333333	0
21754	21754	Tesk1	17.12	15.57	16.86	12.08	12.68	11.93	34.04	31.08	33.27	24.13	25.53	24	1044.63	950.8	1030.24	706.75	754.87	706.87	16.5167	12.23	32.7967	24.5533	1008.56	722.83
14194	14194	Fh1	43.45	41.61	45.43	44.97	44.61	48.22	86.41	83.05	89.66	89.87	89.83	96.99	1078	1031	1132	1073	1084	1162	43.4967	45.9333	86.3733	92.23	1080.33	1106.33
66658	66658	Ccdc51	3.15	2.56	2.96	2.1	2.56	1.99	6.26	5.1	5.84	4.19	5.16	4.01	122	99	115	78	97	75	2.89	2.21667	5.73333	4.45333	112	83.3333
56077	56077	Dgke	2.36	2.23	2.32	3.75	4.03	3.68	4.7	4.45	4.57	7.48	8.11	7.39	317	299	310	480	525	477	2.30333	3.82	4.57333	7.66	308.667	494
56538	56538	Klk11	0	0	0	0	0.05	0	0	0	0	0	0.11	0	0	0	0	0	1	0	0	0.0166667	0	0.0366667	0	0.333333
320940	320940	Atp11c	4.19	3.28	3.9	4.87	4.7	4.99	8.33	6.56	7.69	9.74	9.47	10.04	403	348	412	473	483	515	3.79	4.85333	7.52667	9.75	387.667	490.333
14622	14622	Gjb5	0.57	0.54	0.38	0.76	0.66	0.43	1.14	1.07	0.75	1.51	1.34	0.87	15	14	10	19	17	11	0.496667	0.616667	0.986667	1.24	13	15.6667
21899	21899	Tlr6	0.54	0.75	0.73	0.28	0.31	0.25	1.07	1.5	1.44	0.56	0.62	0.51	22	34.8	32	12	14.86	12	0.673333	0.28	1.33667	0.563333	29.6	12.9533
17760	17760	Map6	76.35	65.83	64.85	62.6	62.08	62.02	151.83	131.4	127.97	125.09	124.99	124.75	3369	2930	2935	2623	2664	2687	69.01	62.2333	137.067	124.943	3078	2658
70579	70579	Zc3h11a	56.43	58.72	59.36	57.94	57.19	59.16	112.21	117.2	117.13	115.79	115.15	119	4384	4584	4635	4328	4350	4468	58.17	58.0967	115.513	116.647	4534.33	4382
14397	14397	Gabra4	1.72	1.66	1.35	0.98	0.87	0.84	3.42	3.32	2.67	1.95	1.75	1.68	118	116	95	65	58	57	1.57667	0.896667	3.13667	1.79333	109.667	60
104709	104709	Pik3r6	0.09	0.26	0.41	0	0	0	0.18	0.52	0.81	0	0	0	5	14	22	0	0	0	0.253333	0	0.503333	0	13.6667	0
226830	226830	Smyd2	39.81	35.26	38.74	49.82	47.86	47.59	79.17	70.39	76.44	99.56	96.36	95.71	956	843	932	1143	1129	1121	37.9367	48.4233	75.3333	97.21	910.333	1131
59032	59032	Ppp2r3c	8.29	8.56	8.91	8.4	9.09	9.54	16.48	17.09	17.57	16.79	18.3	19.19	320.78	332.6	345.61	314.4	344.71	361.53	8.58667	9.01	17.0467	18.0933	332.997	340.213
71690	71690	Esm1	2.85	1.35	1.91	0.34	0.55	0.4	5.66	2.69	3.77	0.69	1.11	0.81	95	45	64	11	18	13	2.03667	0.43	4.04	0.87	68	14
15398	15398	Hoxa13	0.21	0.53	0.53	0.82	0.59	0.71	0.42	1.06	1.04	1.64	1.19	1.42	4	10	10	15	11	13	0.423333	0.706667	0.84	1.41667	8	13
408067	408067	Zfp874b	2.19	2.27	2.06	1.4	1.97	1.71	4.35	4.54	4.06	2.81	3.97	3.44	149.99	155	143.98	97	138	114	2.17333	1.69333	4.31667	3.40667	149.657	116.333
24044	24044	Scamp2	23.07	23.09	22.86	20.38	19.87	19.97	45.87	46.08	45.12	40.73	40.02	40.18	871	872	866	739	733	732	23.0067	20.0733	45.69	40.31	869.667	734.667
93691	93691	Klf7	9.18	8.89	8.89	17.84	19.95	18.56	18.26	17.74	17.54	35.65	40.17	37.34	934	925	910	1832	2013	2024	8.98667	18.7833	17.8467	37.72	923	1956.33
69912	69912	Nup43	15.12	15.27	14.5	20.79	21.44	22.6	30.08	30.47	28.62	41.54	43.17	45.46	281	283	271	372	391	408	14.9633	21.61	29.7233	43.39	278.333	390.333
224065	224065	Uts2b	0.87	0.29	1.06	0	0.1	0.1	1.74	0.59	2.09	0	0.2	0.2	9	3	11	0	1	1	0.74	0.0666667	1.47333	0.133333	7.66667	0.666667
235542	235542	Ppp2r3a	3.91	3.95	3.55	5.83	6.2	6.37	7.77	7.89	7	11.64	12.47	12.81	468	478	427	678	735	751	3.80333	6.13333	7.55333	12.3067	457.667	721.333
11674	11674	Aldoa	634.62	681.62	659.81	505.38	496.84	493.55	1262.02	1360.48	1302.04	1009.95	1000.4	992.72	14292	15331	14935	10998	10991	10817	658.683	498.59	1308.18	1001.02	14852.7	10935.3
56410	56410	Cbln3	0.04	0.06	0.02	0.04	0.03	0.03	0.07	0.12	0.05	0.08	0.05	0.05	3.04	5.01	2	3	2	2	0.04	0.0333333	0.08	0.06	3.35	2.33333
68776	68776	Taf11	16.05	14.45	15.09	17.82	16.67	16.57	31.91	28.84	29.78	35.61	33.56	33.33	534.3	486.26	501.28	564.05	539	535.16	15.1967	17.02	30.1767	34.1667	507.28	546.07
228850	228850	Ralgapb	16.08	15.66	14.28	15.63	16.19	15.79	31.98	31.25	28.18	31.23	32.59	31.76	2376	2318	2111	2211	2328	2265	15.34	15.87	30.47	31.86	2268.33	2268
245857	245857	Ssh3	7.75	9.02	8.88	4.8	4.74	4.5	15.42	17.99	17.52	9.59	9.55	9.05	357	415	409	212	213	201	8.55	4.68	16.9767	9.39667	393.667	208.667
22431	22431	Wt1	0.45	0.31	0.45	0.41	0.34	0.28	0.89	0.62	0.88	0.81	0.68	0.56	23	16	23	20	17	14	0.403333	0.343333	0.796667	0.683333	20.6667	17
115487084	115487084	LOC115487084	0.37	0.41	0.33	0.26	0.33	0.38	0.73	0.81	0.64	0.51	0.67	0.77	9.07	10.03	8.09	6.1	8.11	9.15	0.37	0.323333	0.726667	0.65	9.06333	7.78667
58916	58916	Myot	0.06	0	0.03	0	0	0	0.12	0	0.06	0	0	0	2	0	1	0	0	0	0.03	0	0.06	0	1	0
11815	11815	Apod	1.17	1.71	1.72	1.34	0.85	1.51	2.32	3.41	3.4	2.68	1.7	3.04	38	56	56	42	27	48	1.53333	1.23333	3.04333	2.47333	50	39
66177	66177	Ubl5	126.14	137.41	126.9	111.91	115.23	112.04	250.84	274.26	250.42	223.65	232.01	225.36	647.26	708.42	674.84	567.23	591.34	564.41	130.15	113.06	258.507	227.007	676.84	574.327
66775	66775	Hacd4	8.28	9.57	8.95	12.37	11.68	12.03	16.47	19.1	17.66	24.72	23.52	24.2	359.77	422.02	389.91	512.51	497.82	518.43	8.93333	12.0267	17.7433	24.1467	390.567	509.587
13131	13131	Dab1	0	0	0	0	0.12	0.06	0	0	0	0	0.24	0.12	0	0	0	0	2	1	0	0.06	0	0.12	0	1
387285	387285	Hcrtr2	0	0	0.03	0	0	0	0	0	0.06	0	0	0	0	0	2	0	0	0	0.01	0	0.02	0	0.666667	0
242377	242377	Pm20d2	0.3	0.33	0.24	0.15	0.2	0.18	0.6	0.66	0.47	0.3	0.41	0.36	29	32	23	14	19	17	0.29	0.176667	0.576667	0.356667	28	16.6667
67158	67158	Sft2d3	1.86	1.58	1.73	1.42	1.51	1.65	3.7	3.15	3.4	2.84	3.03	3.31	86	73	80	63	68	74	1.72333	1.52667	3.41667	3.06	79.6667	68.3333
51800	51800	Bok	25.9	22.65	25.74	40.42	40.78	39.55	51.5	45.21	50.79	80.78	82.1	79.55	608	531	607	913	938	902	24.7633	40.25	49.1667	80.81	582	917.667
245525	245525	Hsf3	0	0	0.02	0	0.02	0	0	0	0.05	0	0.05	0	0	0	1	0	1	0	0.00666667	0.00666667	0.0166667	0.0166667	0.333333	0.333333
382038	382038	Urb2	8.28	6.84	8.1	9.82	10.62	10.27	16.46	13.66	15.99	19.62	21.39	20.65	854	708	843	976	1070	1032	7.74	10.2367	15.37	20.5533	801.667	1026
100689	100689	Spon2	2.6	2.07	2.44	0.4	0.29	0.37	5.16	4.12	4.81	0.81	0.57	0.75	93	74	84	13	10	11	2.37	0.353333	4.69667	0.71	83.6667	11.3333
73242	73242	Atat1	6.74	7.59	7.5	4.67	5.75	5.37	13.4	15.15	14.79	9.33	11.59	10.8	259	313	306.99	153	167.18	181	7.27667	5.26333	14.4467	10.5733	292.997	167.06
235431	235431	Coro2b	1.38	2.16	1.53	2.45	2.46	2.28	2.75	4.31	3.02	4.89	4.95	4.59	84	124	89	138	139	131	1.69	2.39667	3.36	4.81	99	136
115490161	115490161	LOC115490161	17.09	17.2	16.77	14.45	15.27	14.39	33.99	34.33	33.1	28.89	30.74	28.95	838.39	844.14	824.33	680.3	731.16	685.43	17.02	14.7033	33.8067	29.5267	835.62	698.963
12369	12369	Casp7	3.17	4.94	4.37	6.13	6.24	5.56	6.3	9.85	8.62	12.25	12.56	11.18	120	187	166	223	231	204	4.16	5.97667	8.25667	11.9967	157.667	219.333
353287	353287	Clec18a	0	0	0	0	0.04	0	0	0	0	0	0.07	0	0	0	0	0	1	0	0	0.0133333	0	0.0233333	0	0.333333
114663	114663	Impa2	4.86	4.83	4.1	7.01	8.87	8.21	9.67	9.65	8.09	14	17.86	16.51	130	129	110	180	232	213	4.59667	8.03	9.13667	16.1233	123	208.333
105439	105439	Slain1	0	0	0.11	0.09	0.02	0.07	0	0	0.21	0.18	0.04	0.13	0	0	5	4	1	3	0.0366667	0.06	0.07	0.116667	1.66667	2.66667
56307	56307	Metap2	90.57	82.26	88.55	96.48	97.73	102.63	180.1	164.19	174.75	192.81	196.78	206.42	3893.41	3537	3844	3996	4115.74	4306	87.1267	98.9467	173.013	198.67	3758.14	4139.25
105450	105450	Mmrn2	0.01	0	0.03	0.02	0.02	0	0.03	0	0.06	0.03	0.03	0	1	0	2	1	1	0	0.0133333	0.0133333	0.03	0.02	1	0.666667
211488	211488	Ado	10.94	11.25	10.64	11.88	13.23	12.42	21.76	22.44	20.99	23.74	26.63	24.99	832	856	810	866	981	917	10.9433	12.51	21.73	25.12	832.667	921.333
75146	75146	Mfsd13a	1.39	1.34	1.74	1.05	0.89	0.76	2.77	2.67	3.44	2.1	1.8	1.53	51	49	64	37	32	27	1.49	0.9	2.96	1.81	54.6667	32
72308	72308	Brf1	13.39	14.25	13.51	15.6	15.22	14.94	26.62	28.44	26.67	31.18	30.64	30.05	863	900	846	937	907	920	13.7167	15.2533	27.2433	30.6233	869.667	921.333
215951	215951	Afg1l	2.24	2.7	2.37	1.92	2.09	1.88	4.45	5.39	4.68	3.85	4.21	3.77	91	110	96	75	83	74	2.43667	1.96333	4.84	3.94333	99	77.3333
433022	433022	Plcxd2	5.95	4.4	6.48	3.62	3.26	3.34	11.83	8.78	12.79	7.23	6.57	6.71	766	567	835	446	409	417	5.61	3.40667	11.1333	6.83667	722.667	424
100529082	100529082	Gm11127	0.29	0.27	0.29	0.33	0.34	0.75	0.58	0.54	0.57	0.66	0.69	1.51	5.71	5.27	5.64	6.18	6.62	14.22	0.283333	0.473333	0.563333	0.953333	5.54	9.00667
64383	64383	Sirt2	52.13	57.56	56.68	48.62	51.15	48.66	103.66	114.89	111.85	97.17	102.98	97.87	1475	1629	1612	1324	1416	1341	55.4567	49.4767	110.133	99.34	1572	1360.33
72522	72522	Atxn7l2	1.91	1.55	1.87	1.69	1.92	1.9	3.8	3.09	3.69	3.37	3.87	3.82	76	62	75	65	75	73	1.77667	1.83667	3.52667	3.68667	71	71
56398	56398	Chp1	79.37	76.23	80.15	64.03	63.14	62.82	157.85	152.15	158.17	127.96	127.13	126.35	3363	3230	3403.99	2604	2613	2584	78.5833	63.33	156.057	127.147	3332.33	2600.33
218121	218121	Mboat1	1.47	1.98	1.8	2.74	2.94	3.85	2.93	3.94	3.56	5.47	5.93	7.74	70	94	86	125	123	163	1.75	3.17667	3.47667	6.38	83.3333	137
67590	67590	Tctn3	2.5	3.02	2.6	2.53	2.9	2.85	4.98	6.02	5.13	5.06	5.83	5.74	103	132	117	109	127	101	2.70667	2.76	5.37667	5.54333	117.333	112.333
330064	330064	Slc5a6	2.86	2.43	2.79	3.03	3.18	3.37	5.69	4.85	5.5	6.06	6.4	6.79	154	131	148	154	164	175	2.69333	3.19333	5.34667	6.41667	144.333	164.333
115490385	115490385	LOC115490385	0.03	0.03	0.01	0.04	0.05	0.03	0.07	0.05	0.02	0.09	0.1	0.07	4	3	1	5	6	4	0.0233333	0.04	0.0466667	0.0866667	2.66667	5
100855	100855	Tbc1d14	9.13	10.59	10.2	8.98	8.7	9.22	18.16	21.13	20.12	17.94	17.52	18.55	645	749	725	602	597	629	9.97333	8.96667	19.8033	18.0033	706.333	609.333
67763	67763	Prpsap1	34.68	32.65	35.82	33.31	34.5	33.14	68.96	65.16	70.69	66.57	69.47	66.67	1023	955	1052	942	991	944	34.3833	33.65	68.27	67.57	1010	959
72147	72147	Zbtb46	0.93	1.06	0.96	0.85	0.57	0.76	1.86	2.12	1.9	1.71	1.16	1.53	59	64	65	40	34	44	0.983333	0.726667	1.96	1.46667	62.6667	39.3333
72301	72301	Shisal1	0.01	0.01	0.01	0.01	0.01	0.01	0.02	0.02	0.02	0.02	0.02	0.02	1	1	1	1	1	1	0.01	0.01	0.02	0.02	1	1
245020	245020	Slc35g2	1.94	1.71	1.59	1.74	1.51	1.76	3.85	3.42	3.13	3.48	3.05	3.54	51.68	50.78	42.18	45.76	46.18	41	1.74667	1.67	3.46667	3.35667	48.2133	44.3133
268301	268301	Sowahc	2.9	2.88	3.1	3.95	3.64	4.13	5.76	5.75	6.12	7.9	7.32	8.31	224	223	240	293	274	310	2.96	3.90667	5.87667	7.84333	229	292.333
15116	15116	Has1	3.41	2.89	3.1	2.57	2.26	2.4	6.79	5.77	6.12	5.13	4.56	4.84	673.37	591.44	620.71	493.27	446.01	474.53	3.13333	2.41	6.22667	4.84333	628.507	471.27
241303	241303	Fam78a	0.34	0.44	0.35	0.03	0.02	0	0.68	0.88	0.69	0.06	0.03	0	14	27	24	2	1	0	0.376667	0.0166667	0.75	0.03	21.6667	1
230099	230099	Car9	0.72	0.93	1	0.3	0.47	0.58	1.44	1.86	1.98	0.61	0.94	1.17	22	28	31	9	14	17	0.883333	0.45	1.76	0.906667	27	13.3333
268880	268880	Xxylt1	20.48	21.83	18.22	20.75	20.98	20.49	40.73	43.57	35.95	41.48	42.24	41.22	1009	1069	906	991	1018	990	20.1767	20.74	40.0833	41.6467	994.667	999.667
118446	118446	Gjc3	0.14	0.12	0.19	0.17	0.23	0.26	0.28	0.24	0.37	0.34	0.47	0.52	8.47	7.31	11.23	9.88	13.84	15.29	0.15	0.22	0.296667	0.443333	9.00333	13.0033
14957	14957	H1f3	0.76	0.98	0.43	1.01	0.55	0.33	1.51	1.96	0.85	2.01	1.1	0.67	7	9	4	9	5	3	0.723333	0.63	1.44	1.26	6.66667	5.66667
71059	71059	Hexim2	0.72	1.37	0.81	0.64	0.51	0.78	1.43	2.73	1.61	1.27	1.03	1.56	42	71	45	19	22	23	0.966667	0.643333	1.92333	1.28667	52.6667	21.3333
18286	18286	Odf2	27.93	29.97	29.22	29.22	28.62	31.02	55.55	59.82	57.66	58.39	57.63	62.4	1643	1773	1728	1631	1639	1752	29.04	29.62	57.6767	59.4733	1714.67	1674
66194	66194	Pycrl	12.27	12.52	13.29	15.72	12.27	14.3	24.4	24.99	26.23	31.41	24.7	28.77	241	246	263	297	237	274	12.6933	14.0967	25.2067	28.2933	250	269.333
320581	320581	Idi2	0.03	0.03	0	0	0	0	0.06	0.06	0	0	0	0	1	1	0	0	0	0	0.02	0	0.04	0	0.666667	0
332427	332427	Lyg2	0.05	0	0.02	0	0	0	0.1	0	0.05	0	0	0	2	0	1	0	0	0	0.0233333	0	0.05	0	1	0
105171	105171	Arrdc3	3.27	4.04	4.47	2.86	3.09	3.03	6.5	8.07	8.81	5.72	6.21	6.09	227	283	313	189	210	206	3.92667	2.99333	7.79333	6.00667	274.333	201.667
21372	21372	Tbl1x	41.37	44.75	39.96	43.61	45.07	48.08	82.27	89.33	78.86	87.15	90.75	96.7	3381	3557	3212	3354	3529	3752	42.0267	45.5867	83.4867	91.5333	3383.33	3545
13445	13445	Cdk2ap1	96.13	80.99	99.89	113.26	108.3	99.9	191.17	161.65	197.12	226.33	218.06	200.94	1716	1442	1794	1948	1898	1733	92.3367	107.153	183.313	215.11	1650.67	1859.67
54124	54124	Cks1b	116.91	89.59	129.03	125.75	125.3	121.84	232.49	178.81	254.63	251.3	252.29	245.08	1037	789	1159	1082	1101	1052	111.843	124.297	221.977	249.557	995	1078.33
109685	109685	Hyal3	0.18	0.04	0.07	0.04	0	0.07	0.35	0.07	0.14	0.07	0	0.15	5	1	2	1	0	2	0.0966667	0.0366667	0.186667	0.0733333	2.66667	1
27222	27222	Atp1a4	0	0.02	0	0	0	0	0	0.05	0	0	0	0	0	1	0	0	0	0	0.00666667	0	0.0166667	0	0.333333	0
69183	69183	C1qtnf2	6.48	7.9	5.86	10.29	8.85	8.88	12.88	15.76	11.55	20.56	17.82	17.87	111	135	101	170	149	148	6.74667	9.34	13.3967	18.75	115.667	155.667
18654	18654	Pgf	3.6	2.05	4.76	3.9	2.71	3.79	7.17	4.09	9.39	7.79	5.45	7.62	88	48	117	89	64	86	3.47	3.46667	6.88333	6.95333	84.3333	79.6667
20068	20068	Rps17	1319.82	1383.52	1345.28	1436.48	1412.17	1400.58	2624.65	2761.45	2654.71	2870.66	2843.41	2817.12	4935	5074	5179	5304	5350	5123	1349.54	1416.41	2680.27	2843.73	5062.67	5259
18155	18155	Pnoc	0.12	0.06	0.25	0	0	0	0.25	0.13	0.49	0	0	0	3	1	4	0	0	0	0.143333	0	0.29	0	2.66667	0
67050	67050	Nkap	6.79	6.83	6.79	7.26	7.35	7.3	13.51	13.63	13.39	14.5	14.79	14.68	494	497	494	506	521	515	6.80333	7.30333	13.51	14.6567	495	514
76293	76293	Mfap4	26.96	38.11	31.68	39.57	40.27	38.38	53.61	76.07	62.52	79.09	81.09	77.19	618	874	731	875	908	857	32.25	39.4067	64.0667	79.1233	741	880
381485	381485	Trim55	0.04	0	0	0	0	0	0.08	0	0	0	0	0	1	0	0	0	0	0	0.0133333	0	0.0266667	0	0.333333	0
67849	67849	Cdca5	8.36	6.75	7.29	10.65	10.6	10.99	16.62	13.47	14.39	21.28	21.34	22.1	249	201	218	305	309	318	7.46667	10.7467	14.8267	21.5733	222.667	310.667
319955	319955	Ercc6	3.35	3.53	3.62	4.86	5.12	4.93	6.66	7.05	7.15	9.72	10.32	9.92	493	527	542	693	736	701	3.5	4.97	6.95333	9.98667	520.667	710
56176	56176	Pigp	23.75	26.79	25.74	21.75	19.86	24.94	47.22	53.46	50.79	43.46	39.99	50.16	222.04	251	246.17	202.08	186.11	228	25.4267	22.1833	50.49	44.5367	239.737	205.397
51944	51944	Knstrn	15.04	11.27	15.86	15.11	13.51	15.79	29.9	22.5	31.29	30.2	27.2	31.77	548	465	596	503	478	557	14.0567	14.8033	27.8967	29.7233	536.333	512.667
26754	26754	Cops5	61.68	60.7	64.47	64.35	66.75	70.2	122.66	121.15	127.22	128.6	134.41	141.19	1631	1600	1713	1635	1721	1801	62.2833	67.1	123.677	134.733	1648	1719
279028	279028	Adamts13	0.04	0	0.02	0.03	0	0.02	0.07	0	0.04	0.07	0	0.04	2.07	0	1.29	1.89	0	1.1	0.02	0.0166667	0.0366667	0.0366667	1.12	0.996667
13491	13491	Drd4	0	0	0.04	0.49	0.48	0.96	0	0	0.08	0.98	0.96	1.93	0	0	2	12	11	19	0.0133333	0.643333	0.0266667	1.29	0.666667	14
235469	235469	Zfp280d	6.02	6.14	5.83	6.44	7.11	7.06	11.98	12.26	11.51	12.88	14.32	14.2	437	447	420	449	496	500	5.99667	6.87	11.9167	13.8	434.667	481.667
100039953	100039953	Gfy	0	0	0	0	0.03	0	0	0	0	0	0.07	0	0	0	0	0	1	0	0	0.01	0	0.0233333	0	0.333333
109349	109349	Fam163b	0	0	0	0	0	0.02	0	0	0	0	0	0.05	0	0	0	0	0	1	0	0.00666667	0	0.0166667	0	0.333333
98376	98376	Gorab	12.1	10.6	11.9	11.35	11	10.75	24.05	21.15	23.48	22.67	22.15	21.61	501	439	494	451	445	432	11.5333	11.0333	22.8933	22.1433	478	442.667
20274	20274	Scn9a	0	0	0.01	0.01	0.01	0	0	0	0.02	0.01	0.01	0	0	0	2	1	1	0	0.00333333	0.00666667	0.00666667	0.00666667	0.666667	0.666667
76707	76707	Clasp1	17.83	17.96	17.74	17.63	17.8	17.61	35.45	35.85	35	35.23	35.83	35.42	2411	2434	2402	2287	2347	2312	17.8433	17.68	35.4333	35.4933	2415.67	2315.33
224044	224044	Cyp2ab1	0	0	0.04	0	0.02	0.02	0	0	0.07	0	0.05	0.05	0	0	1	0	1	1	0.0133333	0.0133333	0.0233333	0.0333333	0.333333	0.666667
216613	216613	Ccdc85a	2.1	1.84	2.42	0.35	0.51	0.44	4.17	3.68	4.77	0.71	1.02	0.89	214	178	238	37	51	45	2.12	0.433333	4.20667	0.873333	210	44.3333
353344	353344	Opn5	0.11	0	0	0.07	0.11	0.07	0.21	0	0	0.15	0.22	0.15	3	0	0	2	3	2	0.0366667	0.0833333	0.07	0.173333	1	2.33333
16467	16467	Atcay	0.06	0.02	0.08	0.02	0.03	0.02	0.13	0.03	0.16	0.03	0.07	0.03	4	1	5	1	2	1	0.0533333	0.0233333	0.106667	0.0433333	3.33333	1.33333
75329	75329	Atf7ip2	0.43	0.3	0.43	0.73	0.65	0.64	0.85	0.59	0.84	1.45	1.32	1.28	12	13	18	27	18	27	0.386667	0.673333	0.76	1.35	14.3333	24
16210	16210	Impact	64.63	64.59	64.33	49.08	46.38	48.27	128.52	128.92	126.94	98.08	93.39	97.09	4108	4128	4095	3036	2967	3046	64.5167	47.91	128.127	96.1867	4110.33	3016.33
22724	22724	Zbtb7b	21.97	21.52	19.89	10.52	10.52	9.78	43.69	42.95	39.26	21.01	21.18	19.67	1420	1389	1290	653	662	608	21.1267	10.2733	41.9667	20.62	1366.33	641
68291	68291	Mto1	7.31	7.42	7.24	6.69	6.14	5.7	14.55	14.81	14.29	13.37	12.37	11.46	279	283	277	245	229	211	7.32333	6.17667	14.55	12.4	279.667	228.333
14729	14729	Gp5	0	0	0.03	0.06	0.17	0	0	0	0.06	0.12	0.35	0	0	0	1	2	6	0	0.01	0.0766667	0.02	0.156667	0.333333	2.66667
23801	23801	Aloxe3	0.45	0.12	0.22	0.69	0.77	0.77	0.89	0.24	0.43	1.37	1.55	1.55	21	7	13	34	40	44	0.263333	0.743333	0.52	1.49	13.6667	39.3333
209224	209224	Enox2	1.82	2.12	1.87	3.05	3.44	2.65	3.61	4.23	3.7	6.09	6.93	5.33	99	118	111	176	184	145	1.93667	3.04667	3.84667	6.11667	109.333	168.333
66129	66129	Prxl2c	9.88	10.69	9.08	9.61	10.49	10.92	19.64	21.33	17.92	19.2	21.12	21.96	493	533.57	454	460	511	529	9.88333	10.34	19.63	20.76	493.523	500
26569	26569	Slc27a4	14.35	13.16	14.05	11.26	11.48	10.69	28.53	26.27	27.73	22.5	23.12	21.5	989	908	970	744	772	715	13.8533	11.1433	27.51	22.3733	955.667	743.667
268902	268902	Robo2	0.91	1.63	1.15	0.32	0.33	0.27	1.81	3.25	2.26	0.65	0.66	0.55	142	255	178	48	50.18	40	1.23	0.306667	2.44	0.62	191.667	46.06
66869	66869	Zfp869	8.76	8.81	8.18	9.37	9.94	10.59	17.42	17.58	16.15	18.72	20.01	21.31	477	485	455	486	525	563	8.58333	9.96667	17.05	20.0133	472.333	524.667
69623	69623	Zfp33b	3.6	4.19	3.29	4.05	4.1	3.53	7.16	8.37	6.5	8.09	8.25	7.09	161	190	152	178	182	156	3.69333	3.89333	7.34333	7.81	167.667	172
207704	207704	Gtpbp10	7.86	8.38	8.62	13.32	13.59	13.36	15.63	16.72	17.02	26.62	27.36	26.86	388	414	427	631	655	639	8.28667	13.4233	16.4567	26.9467	409.667	641.667
70661	70661	Sik3	12.94	12.86	14.31	12.25	12.53	12.67	25.73	25.66	28.23	24.49	25.24	25.48	1418	1411	1569	1287	1337	1346	13.37	12.4833	26.54	25.07	1466	1323.33
65103	65103	Arl6ip6	10.22	9.19	11.44	12.28	12.09	12.66	20.32	18.33	22.58	24.53	24.34	25.46	425	382	477	490	491	511	10.2833	12.3433	20.41	24.7767	428	497.333
319710	319710	Frmd6	49.48	58.72	46.4	88.8	92.93	89.94	98.39	117.2	91.56	177.46	187.11	180.9	3988	4736	3739	6845	7292	7028	51.5333	90.5567	102.383	181.823	4154.33	7055
53607	53607	Snrpa	44.68	45.21	44.78	52.28	53.98	53.93	88.85	90.24	88.37	104.47	108.69	108.47	881	891	886	993	1043	1030	44.89	53.3967	89.1533	107.21	886	1022
12638	12638	Cftr	0.04	0.06	0.03	0.06	0.09	0.05	0.07	0.13	0.05	0.11	0.19	0.09	4	7	3	6	10	5	0.0433333	0.0666667	0.0833333	0.13	4.66667	7
15214	15214	Hey2	0.27	0.1	0.44	0.38	0.37	0.4	0.53	0.19	0.86	0.76	0.75	0.8	11	4	18	15	15	16	0.27	0.383333	0.526667	0.77	11	15.3333
383766	383766	Tldc2	0.23	0.25	0.24	0.17	0.24	0.23	0.45	0.5	0.46	0.34	0.49	0.46	25	26	24	14	24	23	0.24	0.213333	0.47	0.43	25	20.3333
13839	13839	Epha5	0.05	0.12	0.08	0.09	0.13	0.1	0.09	0.25	0.17	0.18	0.26	0.19	7	14	8	11	13.94	7	0.0833333	0.106667	0.17	0.21	9.66667	10.6467
67157	67157	2610301B20Rik	7.88	8.39	8.08	6.41	6.31	6.25	15.66	16.75	15.94	12.8	12.71	12.57	266	283	273	208	209	205	8.11667	6.32333	16.1167	12.6933	274	207.333
14595	14595	B4galt1	63.57	69.12	61.15	63.83	66.19	66.24	126.42	137.96	120.67	127.57	133.27	133.24	4939	5375	4756	4754	5014	4995	64.6133	65.42	128.35	131.36	5023.33	4921
244879	244879	Npat	9.29	8.92	8.59	10.06	10.12	10.67	18.47	17.79	16.95	20.1	20.38	21.46	948	918	890	980	1021	1057	8.93333	10.2833	17.7367	20.6467	918.667	1019.33
74158	74158	Josd1	18.08	18.25	19.37	19.24	19.54	18.92	35.96	36.42	38.22	38.44	39.34	38.05	1029	1039	1104	1050	1085	1045	18.5667	19.2333	36.8667	38.61	1057.33	1060
93695	93695	Gpnmb	290.84	302.99	392.76	89.75	86.92	86.94	578.38	604.76	775.06	179.36	175.01	174.86	18691	19486	25277	5531	5449	5423	328.863	87.87	652.733	176.41	21151.3	5467.67
79264	79264	Krit1	7.72	8.08	7.82	7.38	7.72	7.85	15.35	16.13	15.42	14.74	15.55	15.78	807	847	817	740	793	799	7.87333	7.65	15.6333	15.3567	823.667	777.333
381651	381651	Odaph	0.45	0.45	0.33	0	0.34	0.58	0.89	0.9	0.66	0	0.68	1.16	4	4	3	0	3	5	0.41	0.306667	0.816667	0.613333	3.66667	2.66667
66615	66615	Atg4b	18.05	19.65	17.89	17.32	17.31	17.09	35.9	39.22	35.3	34.61	34.86	34.38	953	1038	946	877	891	876	18.53	17.24	36.8067	34.6167	979	881.333
20630	20630	Snrpc	78.62	71.7	84.51	94	92.74	94.79	156.35	143.11	166.76	187.86	186.73	190.66	705	638	767	817	822	827	78.2767	93.8433	155.407	188.417	703.333	822
94213	94213	Ddx50	28.85	32.54	28.22	28.9	28.65	27.67	57.38	64.94	55.68	57.75	57.69	55.65	1303	1474	1273	1261	1267	1216	29.87	28.4067	59.3333	57.03	1350	1248
207958	207958	Alg11	7.4	7.05	6.5	7.45	7.21	7.75	14.71	14.08	12.82	14.89	14.51	15.59	631	602	554	609	599	641	6.98333	7.47	13.87	14.9967	595.667	616.333
225994	225994	Nmrk1	2.91	3.97	3.02	2.99	3.84	3.43	5.79	7.92	5.96	5.97	7.74	6.9	75.53	108	78.04	73	98	88.02	3.3	3.42	6.55667	6.87	87.19	86.34
245128	245128	AU018091	0.02	0	0.03	0.02	0.02	0	0.03	0	0.07	0.04	0.04	0	1	0	2	1	1	0	0.0166667	0.0133333	0.0333333	0.0266667	1	0.666667
104110	104110	Adcy4	1.17	1.48	1.79	2.3	2.24	2.24	2.33	2.95	3.54	4.59	4.51	4.51	68	86	97	126	121	112	1.48	2.26	2.94	4.53667	83.6667	119.667
269400	269400	Rtel1	7.67	7.4	7.7	11.16	10.89	11.88	15.26	14.78	15.19	22.31	21.92	23.9	575	556	577	799	797	858	7.59	11.31	15.0767	22.71	569.333	818
53375	53375	Mtx2	40.18	45.07	38.61	51.96	52.58	51.29	79.89	89.95	76.19	103.84	105.87	103.17	723	809	699	901	929	897	41.2867	51.9433	82.01	104.293	743.667	909
242700	242700	Ifnlr1	0.13	0.22	0.15	0.06	0	0.05	0.26	0.44	0.29	0.12	0	0.09	9	15	10	4	0	3	0.166667	0.0366667	0.33	0.07	11.3333	2.33333
58186	58186	Rad18	9.39	8.13	10.89	15.03	16.41	16.96	18.67	16.23	21.49	30.03	33.04	34.12	396	339	458	607	673	693	9.47	16.1333	18.7967	32.3967	397.667	657.667
20730	20730	Spink1	0	0	0	0.35	0	0	0	0	0	0.71	0	0	0	0	0	1	0	0	0	0.116667	0	0.236667	0	0.333333
108657	108657	Rnpepl1	11.04	11.35	10.76	9.98	11.15	10.61	21.95	22.66	21.23	19.94	22.44	21.34	567	589	553	489	558	527	11.05	10.58	21.9467	21.24	569.667	524.667
14859	14859	Gsta3	1.78	3.51	4.78	0.66	0.54	0.36	3.53	7	9.43	1.32	1.09	0.72	36	71	98	13	11	7	3.35667	0.52	6.65333	1.04333	68.3333	10.3333
320100	320100	Relt	4.2	3.33	3.96	5.23	5.05	5.12	8.36	6.66	7.82	10.45	10.17	10.3	209	169	198	252	243	243	3.83	5.13333	7.61333	10.3067	192	246
666532	666532	Zfp991	24.51	24.28	18.9	24.09	24.29	24.32	48.75	48.46	37.29	48.14	48.9	48.91	1110.92	1100.55	858.22	1047.76	1074.8	1069.94	22.5633	24.2333	44.8333	48.65	1023.23	1064.17
381270	381270	2024-03-04	0.01	0.01	0.03	0	0	0.01	0.03	0.03	0.06	0	0	0.03	1	1	2	0	0	1	0.0166667	0.00333333	0.04	0.01	1.33333	0.333333
67091	67091	Trappc6a	15.32	15.4	13.2	14.1	14.69	11.7	30.47	30.74	26.04	28.18	29.58	23.53	154	154	135	135	145	113	14.64	13.4967	29.0833	27.0967	147.667	131
14007	14007	Celf2	7.29	6.64	7.86	7	6.71	6.44	14.49	13.25	15.52	13.98	13.52	12.95	1001	909	1081	916	893	861	7.26333	6.71667	14.42	13.4833	997	890
77053	77053	Sun1	21.34	21.31	19.75	22.58	22.96	22.35	42.44	42.54	38.97	45.12	46.23	44.96	1485	1484	1374	1514	1563	1516	20.8	22.63	41.3167	45.4367	1447.67	1531
18585	18585	Pde9a	0.04	0	0.12	0.1	0.04	0.08	0.08	0	0.24	0.19	0.08	0.16	1	0	4	3	1	2	0.0533333	0.0733333	0.106667	0.143333	1.66667	2
22365	22365	Vps45	6.01	6.84	6.7	6.74	6.05	6.43	11.95	13.65	13.23	13.47	12.18	12.93	262	296	290	281	256	272	6.51667	6.40667	12.9433	12.86	282.667	269.667
13000	13000	Csnk2a2	34.81	32.51	34.76	36.37	38.59	38.79	69.22	64.89	68.59	72.69	77.7	78.03	946	875	941	946	1041	1028	34.0267	37.9167	67.5667	76.14	920.667	1005
99439	99439	Duox1	0.07	0.09	0.07	0.09	0.08	0.09	0.13	0.18	0.13	0.18	0.16	0.18	6	8	6	8	7	8	0.0766667	0.0866667	0.146667	0.173333	6.66667	7.66667
100039210	100039210	Gm2102	0	0	0.06	0	0.02	0.02	0	0	0.11	0	0.04	0.04	0	0	3	0	1	1	0.02	0.0133333	0.0366667	0.0266667	1	0.666667
12919	12919	Crhbp	0.43	0.31	0.46	0.32	0.24	0.2	0.85	0.62	0.92	0.65	0.48	0.4	11	8	12	8	6	5	0.4	0.253333	0.796667	0.51	10.3333	6.33333
71566	71566	Clmp	16.52	19.51	19.49	26.05	25.8	25.42	32.86	38.94	38.46	52.06	51.94	51.13	1166	1378	1378	1762	1775	1742	18.5067	25.7567	36.7533	51.71	1307.33	1759.67
16785	16785	Rpsa	707.89	681.21	689.76	824.27	806.3	792.96	1407.74	1359.66	1361.14	1647.21	1623.5	1594.94	20515	19726	20062	22958	22864	22318	692.953	807.843	1376.18	1621.88	20101	22713.3
80385	80385	Tusc2	8.41	10.23	9.2	5.62	5.8	6.05	16.72	20.43	18.15	11.24	11.69	12.18	213	259	234	137	144	149	9.28	5.82333	18.4333	11.7033	235.333	143.333
16403	16403	Itga6	14.53	10.02	14.87	21.47	20.98	22.65	28.9	20.01	29.34	42.91	42.25	45.56	1514	1046	1551	2132	2125	2285	13.14	21.7	26.0833	43.5733	1370.33	2180.67
17685	17685	Msh2	9.3	7.93	9.42	16	16.57	15.55	18.49	15.82	18.58	31.98	33.36	31.28	476	406	483	786	828	773	8.88333	16.04	17.63	32.2067	455	795.667
380840	380840	Lyrm4	5.47	5.87	5.27	6.74	7.24	7.04	10.87	11.72	10.39	13.46	14.59	14.15	124	133	120	147	161	155	5.53667	7.00667	10.9933	14.0667	125.667	154.333
67378	67378	Bbs2	1.8	2.15	1.77	2	2.39	2.47	3.58	4.29	3.5	3.99	4.81	4.98	78	93	77	83	101	104	1.90667	2.28667	3.79	4.59333	82.6667	96
12262	12262	C1qc	20.26	43.2	37.41	0.07	0.07	0	40.29	86.22	73.83	0.14	0.14	0	290	617	540	1	1	0	33.6233	0.0466667	66.78	0.0933333	482.333	0.666667
59024	59024	Med12	8.68	9.18	9.1	10.09	9.46	9.22	17.26	18.32	17.96	20.15	19.05	18.54	1293	1369	1356	1439	1373	1332	8.98667	9.59	17.8467	19.2467	1339.33	1381.33
17524	17524	Mpp1	54	46.72	55.93	32.03	30.65	32.57	107.38	93.25	110.37	64.01	61.72	65.52	2218	1919	2303	1263	1230	1299	52.2167	31.75	103.667	63.75	2146.67	1264
83796	83796	Smarcd2	18.37	21.16	20.42	19.47	20.71	20.7	36.54	42.23	40.3	38.91	41.69	41.63	834	914	905	831	893	887	19.9833	20.2933	39.69	40.7433	884.333	870.333
21943	21943	Tnfsf11	7.01	7.91	9	2.76	2.86	3.22	13.95	15.79	17.76	5.52	5.76	6.48	251	283	323	95	100	112	7.97333	2.94667	15.8333	5.92	285.667	102.333
69956	69956	Ptcd3	24.98	23.13	25.38	31.47	32.27	32.48	49.67	46.17	50.07	62.89	64.97	65.33	1044	966	1064	1259	1312	1316	24.4967	32.0733	48.6367	64.3967	1024.67	1295.67
225131	225131	Wac	18.67	18.31	18.04	18.1	18.87	18.79	37.12	36.54	35.6	36.17	38	37.8	1653	1616	1603	1536	1632	1615	18.34	18.5867	36.42	37.3233	1624	1594.33
71030	71030	4933403O08Rik	0.09	0.14	0.12	0.01	0.01	0.01	0.17	0.27	0.23	0.01	0.03	0.01	10	20	17	1	2	1	0.116667	0.01	0.223333	0.0166667	15.6667	1.33333
26395	26395	Map2k1	72.87	74.66	68.19	62.29	59.42	58.58	144.92	149.02	134.57	124.47	119.65	117.83	2851	2916	2670	2333	2268	2221	71.9067	60.0967	142.837	120.65	2812.33	2274
19896	19896	Rpl10a	611.99	651.34	602.63	725.82	702	713.96	1217.03	1300.06	1189.21	1450.48	1413.48	1436.05	6334	6705	6295	7315	7241	7225	621.987	713.927	1235.43	1433.34	6444.67	7260.33
54562	54562	Lrrc6	0	0	0.03	0	0	0	0	0	0.06	0	0	0	0	0	1	0	0	0	0.01	0	0.02	0	0.333333	0
11829	11829	Aqp4	0.03	0.11	0.94	0.01	0	0	0.07	0.23	1.86	0.02	0	0	3	10	84	1	0	0	0.36	0.00333333	0.72	0.00666667	32.3333	0.333333
115487832	115487832	LOC115487832	2.9	3.25	2.87	2.95	2.91	2.69	5.77	6.49	5.67	5.89	5.86	5.41	190.01	212.88	188.35	185.18	185.94	171.02	3.00667	2.85	5.97667	5.72	197.08	180.713
240843	240843	Brinp2	0	0.06	0.03	0.02	0.02	0.02	0	0.11	0.06	0.03	0.03	0.03	0	4	2	1	1	1	0.03	0.02	0.0566667	0.03	2	1
110959	110959	Nudt19	14.72	14.53	14.9	15.04	15.9	16.29	29.28	29.01	29.41	30.06	32.01	32.76	443	437	450	435	468	476	14.7167	15.7433	29.2333	31.61	443.333	459.667
19054	19054	Ppp2r3d	2.43	2.09	2.4	2.75	2.56	2.31	4.83	4.16	4.73	5.5	5.16	4.64	167.51	143.92	165.42	181.91	172.74	155.46	2.30667	2.54	4.57333	5.1	158.95	170.037
244198	244198	Olfml1	0.13	0.36	0.29	0.03	0.13	0.03	0.26	0.71	0.57	0.07	0.27	0.07	4	11	9	1	4	1	0.26	0.0633333	0.513333	0.136667	8	2
51786	51786	Cpsf2	21.48	21.85	20.97	23.4	23.07	23.77	42.72	43.61	41.38	46.75	46.46	47.82	1956	1990	1916	2047	2053	2105	21.4333	23.4133	42.57	47.01	1954	2068.33
77809	77809	Lrrc42	33.36	34.8	33.97	30.51	28.53	28.53	66.34	69.46	67.03	60.98	57.45	57.38	903	941	923	794	756	750	34.0433	29.19	67.61	58.6033	922.333	766.667
66514	66514	Asrgl1	3.53	3.23	2.84	2.91	2.58	2.17	7.03	6.45	5.61	5.82	5.19	4.37	129	118	104	102	92	77	3.2	2.55333	6.36333	5.12667	117	90.3333
67988	67988	Tmx3	30.74	30.61	29.38	25.95	28.59	27.68	61.14	61.1	57.98	51.86	57.56	55.67	2431	2423	2326	1967	2204	2124	30.2433	27.4067	60.0733	55.03	2393.33	2098.33
241062	241062	Pgap1	1.54	1.63	1.87	1.17	1.12	1.14	3.06	3.25	3.69	2.34	2.26	2.3	289	306	351	211	205	208	1.68	1.14333	3.33333	2.3	315.333	208
330171	330171	Kctd10	136.47	122.69	141.35	145.22	147.19	151.17	271.39	244.88	278.94	290.21	296.37	304.06	7024.21	6317.68	7289.28	7170.77	7395.28	7553.14	133.503	147.86	265.07	296.88	6877.06	7373.06
234889	234889	Gucy1a2	2.49	1.78	2.2	1	0.83	1.34	4.95	3.55	4.35	1.99	1.66	2.7	610	407	540	194	197	221	2.15667	1.05667	4.28333	2.11667	519	204
15248	15248	Hic1	9.83	9.37	9.53	9.95	9.53	9.8	19.54	18.7	18.81	19.88	19.18	19.7	671.34	631.38	646.18	643.51	640.73	654.1	9.57667	9.76	19.0167	19.5867	649.633	646.113
72129	72129	Pex13	7.49	8.68	7.86	7.08	6.98	6.33	14.89	17.32	15.51	14.15	14.06	12.72	413	481	434	375	381	346.59	8.01	6.79667	15.9067	13.6433	442.667	367.53
101809	101809	Spred3	14.07	14.01	13.22	8.48	7.85	7.8	27.99	27.97	26.08	16.94	15.81	15.69	911	886	854	534	502	504	13.7667	8.04333	27.3467	16.1467	883.667	513.333
57377	57377	Mogs	18.7	18.52	17.89	16.34	16.03	15.83	37.19	36.97	35.3	32.66	32.27	31.84	842	838	815	705	695	681	18.37	16.0667	36.4867	32.2567	831.667	693.667
114664	114664	Hsd17b11	17.75	18.54	17.37	14.14	14.44	13.29	35.3	37	34.28	28.27	29.07	26.73	462	482	454	354	368	336	17.8867	13.9567	35.5267	28.0233	466	352.667
381530	381530	Mup20	0.11	0	0	0	0	0	0.21	0	0	0	0	0	1	0	0	0	0	0	0.0366667	0	0.07	0	0.333333	0
319804	319804	Glt1d1	0.09	0.02	0	0	0.04	0	0.17	0.04	0	0	0.09	0	2	1	0	0	1	0	0.0366667	0.0133333	0.07	0.03	1	0.333333
103140	103140	Gstt3	4.04	5.41	5.08	2.63	3.22	2.08	8.04	10.8	10.03	5.26	6.48	4.18	118	158	149	74	92	59	4.84333	2.64333	9.62333	5.30667	141.667	75
60367	60367	Il1rapl2	0.01	0	0	0	0	0	0.02	0	0	0	0	0	1	0	0	0	0	0	0.00333333	0	0.00666667	0	0.333333	0
100986	100986	Akap9	6.77	7.27	6.18	6.53	6.1	6.11	13.45	14.51	12.19	13.04	12.27	12.29	1503	1623	1383	1382	1323	1324	6.74	6.24667	13.3833	12.5333	1503	1343
242509	242509	Bnc2	2.36	3.11	2.39	4	4.02	3.87	4.69	6.21	4.72	8	8.1	7.79	531	703	532	862	883	844	2.62	3.96333	5.20667	7.96333	588.667	863
15213	15213	Hey1	0.34	0.4	0.51	0.12	0.14	0.21	0.68	0.79	1	0.24	0.27	0.41	12	14	18	4	4	6	0.416667	0.156667	0.823333	0.306667	14.6667	4.66667
73699	73699	Ppp2r1b	24.55	21.76	24.43	22.64	23.85	25.18	48.81	43.43	48.21	45.24	48.02	50.65	1417.71	1301.34	1447.7	1256	1322.66	1368.13	23.58	23.89	46.8167	47.97	1388.92	1315.6
238693	238693	Zfp58	1.71	2.23	2.15	2.05	1.96	2.57	3.4	4.46	4.24	4.1	3.95	5.17	65	85	82	75	73	95	2.03	2.19333	4.03333	4.40667	77.3333	81
27878	27878	Tada1	9.14	8.82	10.57	11.28	12.58	11.43	18.17	17.6	20.86	22.54	25.33	22.99	312	301	362	370	420	379	9.51	11.7633	18.8767	23.62	325	389.667
20674	20674	Sox2	0.42	0.27	0.55	0.39	0.38	0.33	0.84	0.55	1.08	0.78	0.77	0.67	17	11	22	15	15	13	0.413333	0.366667	0.823333	0.74	16.6667	14.3333
328573	328573	4930407I10Rik	0	0	0	0	0.01	0	0	0	0	0	0.03	0	0	0	0	0	1	0	0	0.00333333	0	0.01	0	0.333333
21379	21379	Tbrg4	17.79	14.68	17.37	23.48	24.62	22.55	35.37	29.29	34.28	46.93	49.57	45.36	856	714	836	1102	1158	1050	16.6133	23.55	32.98	47.2867	802	1103.33
263764	263764	Creg2	0.28	0.52	0.53	0	0.01	0.02	0.55	1.03	1.05	0	0.02	0.04	28	53	54	0	1	2	0.443333	0.01	0.876667	0.02	45	1
544791	544791	Myh13	0	0	0	0	0.01	0	0	0	0	0	0.02	0	0	0	0	0	1	0	0	0.00333333	0	0.00666667	0	0.333333
68176	68176	Inka1	12.48	14.26	8.39	8.83	8.95	9.77	24.81	28.47	16.56	17.66	18.02	19.65	180	205	122	123	127	137	11.71	9.18333	23.28	18.4433	169	129
20778	20778	Scarb1	28.74	25.94	27.41	32.01	32.45	31.52	57.15	51.78	54.09	63.98	65.34	63.39	1161	1052	1119	1246	1288	1241	27.3633	31.9933	54.34	64.2367	1110.67	1258.33
214469	214469	Fam168b	56.11	54.12	55.31	61.28	63.59	62.94	111.58	108.01	109.15	122.46	128.03	126.59	4861	4694	4797	5089	5372	5292	55.18	62.6033	109.58	125.693	4784	5251
20256	20256	Clec11a	0.65	1.04	1.01	0.91	0.47	0.87	1.3	2.08	1.99	1.83	0.94	1.75	20	32	31	27	14	26	0.9	0.75	1.79	1.50667	27.6667	22.3333
53621	53621	Cnot4	9.29	8.77	9.11	6.74	6.79	6.53	18.48	17.5	17.97	13.48	13.67	13.14	555	533	549	385	394	374	9.05667	6.68667	17.9833	13.43	545.667	384.333
100041722	100041722	1700049E17Rik2	0.06	0.03	0	0	0	0	0.11	0.07	0	0	0	0	1	1	0	0	0	0	0.03	0	0.06	0	0.666667	0
66464	66464	Taf12	17.49	17.72	18.61	19.22	18.7	16.34	34.78	35.37	36.72	38.41	37.65	32.86	349	351	371	369	363	315	17.94	18.0867	35.6233	36.3067	357	349
68468	68468	Ly6g6c	0	0	0	0	0.08	0	0	0	0	0	0.16	0	0	0	0	0	1	0	0	0.0266667	0	0.0533333	0	0.333333
319765	319765	Igf2bp2	47.53	48.17	47.78	50.33	51.8	50.51	94.52	96.15	94.29	100.57	104.29	101.6	3142	3187	3163	3190	3340	3241	47.8267	50.88	94.9867	102.153	3164	3257
11647	11647	Alpl	0.15	0.15	0.23	0.05	0.05	0.16	0.31	0.29	0.46	0.11	0.1	0.32	6	6	9	2	2	6	0.176667	0.0866667	0.353333	0.176667	7	3.33333
67488	67488	Calcoco1	14.27	16.29	13.45	10.51	11.12	10.89	28.38	32.51	26.54	20.99	22.38	21.91	664	758	627	469	505	492	14.67	10.84	29.1433	21.76	683	488.667
78625	78625	Acsbg3	0.05	0.05	0.02	0	0.02	0.09	0.09	0.09	0.04	0	0.05	0.19	2	2	1	0	1	4	0.04	0.0366667	0.0733333	0.08	1.66667	1.66667
30941	30941	Usp21	7.28	7.71	6.57	6.93	6.45	6.88	14.48	15.4	12.97	13.84	12.99	13.84	254	269	230	232	220	233	7.18667	6.75333	14.2833	13.5567	251	228.333
627352	627352	Morf4l1b	10.55	9.02	10.58	10.55	11.12	11.65	20.98	18.01	20.88	21.09	22.39	23.42	276.71	236.46	278.72	266.19	285.6	296.68	10.05	11.1067	19.9567	22.3	263.963	282.823
67338	67338	Rffl	4.83	4.77	5.67	2.93	2.81	2.56	9.6	9.53	11.19	5.85	5.66	5.15	281.88	278.82	332.87	163.64	160.44	144.46	5.09	2.76667	10.1067	5.55333	297.857	156.18
97848	97848	Serpinb6c	0	0.15	0.1	0	0.05	0.05	0	0.29	0.2	0	0.11	0.11	0	3	2	0	1	1	0.0833333	0.0333333	0.163333	0.0733333	1.66667	0.666667
226610	226610	Fam78b	0.33	0.44	0.45	0.25	0.26	0.31	0.66	0.89	0.89	0.5	0.53	0.62	38	43	45	24	27	31	0.406667	0.273333	0.813333	0.55	42	27.3333
109181	109181	Trip11	11.79	12.46	10.47	10.33	10.45	10.82	23.44	24.88	20.66	20.65	21.05	21.77	1814	1975	1612	1589	1622	1670	11.5733	10.5333	22.9933	21.1567	1800.33	1627
666105	666105	Gm7932	0.03	0	0	0	0	0	0.06	0	0	0	0	0	1	0	0	0	0	0	0.01	0	0.02	0	0.333333	0
29807	29807	Tpk1	1.31	1.9	1.32	1.86	2.09	1.56	2.6	3.79	2.6	3.72	4.22	3.13	61	85	61	82	93	68	1.51	1.83667	2.99667	3.69	69	81
102060	102060	Gadd45gip1	13.53	11.78	13.08	13.15	12.63	13.23	26.91	23.52	25.81	26.27	25.43	26.61	360.89	313.85	350.21	337.05	329.67	342.63	12.7967	13.0033	25.4133	26.1033	341.65	336.45
83382	83382	Siglece	0.04	0.15	0.21	0	0.05	0.04	0.08	0.3	0.41	0	0.1	0.07	1	6	6	0	2	1	0.133333	0.03	0.263333	0.0566667	4.33333	1
12934	12934	Dpysl2	5.51	5.35	5.76	7.61	7.2	7.18	10.96	10.68	11.36	15.21	14.5	14.43	418	406	437	553	533	528	5.54	7.33	11	14.7133	420.333	538
208967	208967	Thnsl1	1.21	1.41	1.53	1.07	0.92	1.26	2.41	2.81	3.02	2.13	1.86	2.54	82	100	104	73	64	88	1.38333	1.08333	2.74667	2.17667	95.3333	75
12013	12013	Bach1	10.99	12.85	10.81	16.57	16.17	16.75	21.85	25.65	21.33	33.12	32.56	33.69	1116	1312	1100	1614	1597	1651	11.55	16.4967	22.9433	33.1233	1176	1620.67
233271	233271	Luzp2	0.05	0.09	0.09	0.12	0.1	0.05	0.09	0.17	0.19	0.24	0.19	0.1	4	8	8	10	8	4	0.0766667	0.09	0.15	0.176667	6.66667	7.33333
241263	241263	Gpr158	0.02	0.01	0	0	0	0	0.05	0.02	0	0	0	0	3	1	0	0	0	0	0.01	0	0.0233333	0	1.33333	0
12167	12167	Bmpr1b	5.52	5.46	5.45	7.72	8	8.22	10.97	10.89	10.76	15.43	16.11	16.54	517	512	504	700	720	746	5.47667	7.98	10.8733	16.0267	511	722
105005	105005	Lratd1	0.42	0.25	0.53	0.44	0.52	0.6	0.84	0.49	1.04	0.88	1.06	1.21	24	14	30	24	29	33	0.4	0.52	0.79	1.05	22.6667	28.6667
66865	66865	Pmpca	49.69	45.57	50.46	50.41	50.41	51.06	98.81	90.96	99.58	100.73	101.51	102.71	2536.61	2340.19	2599.3	2480.77	2519.73	2507.7	48.5733	50.6267	96.45	101.65	2492.03	2502.73
70461	70461	Crtc3	6.8	7.16	6.76	7.16	7.55	7.47	13.53	14.3	13.33	14.31	15.2	15.03	600	634	597	606	652	642	6.90667	7.39333	13.72	14.8467	610.333	633.333
67464	67464	Entpd4	1.05	1.05	0	0	0	0	2.09	2.1	0	0	0	0	53.92	53.76	0	0	0	0	0.7	0	1.39667	0	35.8933	0
75553	75553	Zc3h14	36.39	37.95	36.26	38.71	37.41	39.32	72.37	75.74	71.56	77.36	75.32	79.09	2146.67	2214.18	2116.74	2167.66	2135.49	2230.36	36.8667	38.48	73.2233	77.2567	2159.2	2177.84
19246	19246	Ptpn1	17.09	15.32	17.23	16.02	15.71	15.02	34	30.58	33.99	32.01	31.63	30.21	1235	1109	1253	1114	1108	1058	16.5467	15.5833	32.8567	31.2833	1199	1093.33
74616	74616	Scrn3	6.93	7.83	7.52	6.28	6.79	5.97	13.77	15.63	14.84	12.55	13.67	12.02	272	311	310	238	247	220	7.42667	6.34667	14.7467	12.7467	297.667	235
66855	66855	Tcf25	114.84	117.56	114.54	108.64	110.06	109.45	228.38	234.65	226.03	217.1	221.6	220.15	4823	4926	4816	4485	4639	4600	115.647	109.383	229.687	219.617	4855	4574.67
67317	67317	1700022I11Rik	0	0.02	0.02	0.02	0	0.03	0	0.03	0.03	0.03	0	0.07	0	1	1	1	0	2	0.0133333	0.0166667	0.02	0.0333333	0.666667	1
228536	228536	Bahd1	10.57	10.1	10.54	7.3	7.02	7	21.03	20.17	20.8	14.58	14.14	14.09	809	777	806	535	528	522	10.4033	7.10667	20.6667	14.27	797.333	528.333
56749	56749	Dhodh	6.17	5.01	5.51	10.16	8.64	8.28	12.26	10.01	10.87	20.31	17.4	16.66	230	187	206	364	315	300	5.56333	9.02667	11.0467	18.1233	207.667	326.333
98732	98732	Rab3gap2	19.76	19.02	20.51	20.15	19.98	19.88	39.29	37.96	40.47	40.27	40.24	40	2421	2333	2514	2365	2386	2365	19.7633	20.0033	39.24	40.17	2422.67	2372
170731	170731	Mfn2	36.05	32.75	36.24	33.01	32.34	34.05	71.69	65.36	71.52	65.96	65.11	68.49	2679	2421	2742	2404	2417	2491	35.0133	33.1333	69.5233	66.52	2614	2437.33
68058	68058	Chd1l	5.11	5.52	5.36	7.01	7.64	7.34	10.15	11.02	10.59	14.02	15.38	14.76	249	266	258	326	353	351	5.33	7.33	10.5867	14.72	257.667	343.333
70237	70237	Bhlhb9	9.34	10.26	9.23	10.47	10.2	10.26	18.57	20.49	18.21	20.92	20.54	20.63	433	476	430	466	463	462	9.61	10.31	19.09	20.6967	446.333	463.667
20014	20014	Rpn2	148.36	153.84	143.69	130.33	131.67	130.84	295.04	307.07	283.56	260.45	265.11	263.18	6051	6285	5938	5157	5259.96	5235.82	148.63	130.947	295.223	262.913	6091.33	5217.59
108011	108011	Ap4e1	4.46	4.99	4.26	4.76	5.02	4.69	8.86	9.95	8.42	9.52	10.11	9.43	485	540	446	452	512	492	4.57	4.82333	9.07667	9.68667	490.333	485.333
217331	217331	Unk	4.04	4.49	4.15	5.33	4.76	4.81	8.03	8.95	8.18	10.64	9.58	9.68	255	286	267	326	294	300	4.22667	4.96667	8.38667	9.96667	269.333	306.667
209186	209186	Acnat2	0.03	0.07	0.17	0.03	0	0.1	0.07	0.13	0.33	0.07	0	0.2	1	2	4.99	0.99	0	2.88	0.09	0.0433333	0.176667	0.09	2.66333	1.29
234797	234797	6430548M08Rik	1.47	1.95	1.42	0.89	1.07	1.02	2.93	3.89	2.8	1.78	2.15	2.06	134	181	136	82	100	83	1.61333	0.993333	3.20667	1.99667	150.333	88.3333
238055	238055	Apob	0.14	0.1	0.11	0.02	0.02	0.06	0.27	0.19	0.22	0.04	0.04	0.12	34	24	27	5	5	14	0.116667	0.0333333	0.226667	0.0666667	28.3333	8
15983	15983	Ifrd2	14.58	11.85	14.33	20.11	21.37	21.09	28.99	23.65	28.29	40.19	43.02	42.42	454	368.89	448	601.89	651	638	13.5867	20.8567	26.9767	41.8767	423.63	630.297
115487367	115487367	LOC115487367	18.84	17.25	17.86	19.26	16.68	18.52	37.47	34.43	35.24	38.49	33.58	37.26	610.98	559.05	580.92	599.95	528.75	583.27	17.9833	18.1533	35.7133	36.4433	583.65	570.657
328108	328108	Togaram1	9.87	9.79	9.35	7.23	6.67	7.49	19.63	19.55	18.45	14.45	13.43	15.06	1109	1110	1061	795	740	833	9.67	7.13	19.21	14.3133	1093.33	789.333
13380	13380	Dkk1	0	0.06	0	0.09	0	0	0	0.11	0	0.17	0	0	0	2	0	3	0	0	0.02	0.03	0.0366667	0.0566667	0.666667	1
104174	104174	Gldc	0.16	0.17	0.23	0.18	0.16	0.31	0.31	0.34	0.46	0.36	0.32	0.61	10	11	15	11	10	19	0.186667	0.216667	0.37	0.43	12	13.3333
19245	19245	Ptp4a3	37.95	39.97	36.94	18.59	18.37	17.04	75.47	79.78	72.9	37.14	36.99	34.28	1035	1100	1062	498	497	465	38.2867	18	76.05	36.1367	1065.67	486.667
11957	11957	Atp5j	225.22	233.5	233.06	224.76	218.1	214.68	447.89	466.06	459.9	449.17	439.15	431.8	1717	1681	1771	1642	1619	1546	230.593	219.18	457.95	440.04	1723	1602.33
100151772	100151772	Srsx	0	0	0.04	0	0	0	0	0	0.09	0	0	0	0	0	1	0	0	0	0.0133333	0	0.03	0	0.333333	0
14299	14299	Ncs1	41.02	32.35	40.95	45.15	44.25	45.31	81.57	64.57	80.81	90.24	89.1	91.14	2814	2221	2813	2970	2961	3017	38.1067	44.9033	75.65	90.16	2616	2982.67
19941	19941	Rpl26	1142.12	1249.26	1181.27	1284.22	1268.53	1273.6	2271.26	2493.47	2331.06	2566.38	2554.2	2561.7	5684	6129	6012	6264	6339	6186	1190.88	1275.45	2365.26	2560.76	5941.67	6263
70561	70561	Txndc16	9.07	10.9	8.19	8.49	8.68	8.51	18.03	21.76	16.16	16.96	17.48	17.13	613	743	560	558	567	562	9.38667	8.56	18.65	17.19	638.667	562.333
223473	223473	Nipal2	0.39	0.49	0.44	0.46	0.46	0.28	0.78	0.99	0.87	0.92	0.92	0.56	45.09	54.5	45.73	47.95	49.43	28.8	0.44	0.4	0.88	0.8	48.44	42.06
17449	17449	Mdh1	50.77	51.97	51.63	49.05	46.91	50.6	100.96	103.73	101.89	98.01	94.46	101.78	1561	1597	1593	1449	1411	1511	51.4567	48.8533	102.193	98.0833	1583.67	1457
76373	76373	Zfp773	0.06	0.1	0.16	0.06	0	0.08	0.12	0.2	0.31	0.13	0	0.17	3	5	8	3.03	0	4	0.106667	0.0466667	0.21	0.1	5.33333	2.34333
72042	72042	Cotl1	24.34	28.11	32.66	21.56	20.43	17.75	48.41	56.1	64.46	43.08	41.14	35.71	607	700	818	517	499	430	28.37	19.9133	56.3233	39.9767	708.333	482
99899	99899	Ifi44	0.34	0.49	0.19	0.35	0.45	0.7	0.67	0.97	0.38	0.71	0.9	1.41	16	23	9	16	20	32	0.34	0.5	0.673333	1.00667	16	22.6667
68617	68617	Mtcl1	3.19	2.92	3.1	2.2	2.19	2.41	6.33	5.83	6.12	4.39	4.41	4.85	404	372	395	267	272	298	3.07	2.26667	6.09333	4.55	390.333	279
237890	237890	Slfn14	0	0	0	0	0.02	0	0	0	0	0	0.03	0	0	0	0	0	1	0	0	0.00666667	0	0.01	0	0.333333
207495	207495	Baiap2l2	0.24	0.05	0.19	0.1	0.15	0	0.47	0.1	0.37	0.2	0.29	0	5	2	4	2	3	0	0.16	0.0833333	0.313333	0.163333	3.66667	1.66667
245695	245695	Tceanc	0.61	0.98	0.71	0.82	0.97	0.77	1.21	1.95	1.4	1.64	1.96	1.55	57	77	57	66	70	66	0.766667	0.853333	1.52	1.71667	63.6667	67.3333
269823	269823	Pon3	12.46	18.36	14.14	10.05	11.24	11.18	24.78	36.64	27.9	20.08	22.64	22.49	974	1307	995	642	706	735	14.9867	10.8233	29.7733	21.7367	1092	694.333
75471	75471	1700009N14Rik	3.37	3.1	3.57	4.01	4.5	4.15	6.7	6.19	7.04	8.02	9.06	8.35	61	56	65	70	80	73	3.34667	4.22	6.64333	8.47667	60.6667	74.3333
66409	66409	Rsl1d1	97.59	90.98	97.54	129.31	128.37	132.04	194.06	181.59	192.49	258.41	258.47	265.59	2789	2598	2798	3552	3590	3665	95.37	129.907	189.38	260.823	2728.33	3602.33
17954	17954	Nap1l2	1.6	1.17	1.15	1.86	2.14	2.03	3.18	2.35	2.27	3.72	4.31	4.09	68	50	49	76	89	84	1.30667	2.01	2.6	4.04	55.6667	83
67604	67604	Get4	35.6	34.07	39.23	40.94	43.43	40.56	70.8	68	77.42	81.81	87.45	81.58	1188	1138	1316	1315	1420	1317	36.3	41.6433	72.0733	83.6133	1214	1350.67
18002	18002	Nedd8	213.36	213.69	237.99	221.74	208.46	216.42	424.3	426.51	469.64	443.12	419.74	435.31	1205	1192	1371	1224	1178	1192	221.68	215.54	440.15	432.723	1256	1198
320571	320571	Atp8b5	0.03	0.07	0.04	0.07	0.07	0.03	0.05	0.14	0.09	0.14	0.13	0.06	2	5	3	5	5	2	0.0466667	0.0566667	0.0933333	0.11	3.33333	4
66588	66588	Cmpk1	56.91	58.8	59.77	57.12	56.84	56.63	113.18	117.36	117.94	114.16	114.45	113.91	1669	1723	1759	1610	1631	1613	58.4933	56.8633	116.16	114.173	1717	1618
216169	216169	Abhd17a	40.2	33.42	38.85	42.36	44.07	39.07	79.95	66.7	76.66	84.64	88.73	78.59	946	792	908	972	1024	913	37.49	41.8333	74.4367	83.9867	882	969.667
16855	16855	Lgals4	0.03	0.66	0.58	0.64	0.42	0.15	0.06	1.32	1.14	1.28	0.84	0.29	1	16	14	14	10	3	0.423333	0.403333	0.84	0.803333	10.3333	9
637515	637515	Nlrp1b	0.04	0.31	0.27	0.01	0.01	0.01	0.08	0.62	0.53	0.03	0.03	0.02	4	28.69	24.4	1	1	1	0.206667	0.01	0.41	0.0266667	19.03	1
23960	23960	Oas1g	0.14	0.33	0.25	0.08	0.07	0.14	0.27	0.65	0.5	0.15	0.15	0.28	4.33	10.29	7.98	2.33	2.25	4.23	0.24	0.0966667	0.473333	0.193333	7.53333	2.93667
13401	13401	Dmwd	20.62	18.61	20.98	20.5	22.45	21.07	41.01	37.14	41.4	40.96	45.2	42.37	849	766	866	810	903	842	20.07	21.34	39.85	42.8433	827	851.667
329003	329003	Zfp516	7.41	9.01	7.47	5.79	5.8	5.45	14.73	17.98	14.75	11.58	11.69	10.96	1008	1226	1025	760	770	722	7.96333	5.68	15.82	11.41	1086.33	750.667
18139	18139	Zfp638	15.68	16.13	14.67	11.78	12.03	11.19	31.19	32.19	28.95	23.55	24.22	22.51	1620	1668	1528	1138	1191	1115	15.4933	11.6667	30.7767	23.4267	1605.33	1148
100034251	100034251	Wfdc17	6.03	8.94	10.37	0	0.27	0	11.98	17.85	20.46	0	0.54	0	22	32	39	0	1	0	8.44667	0.09	16.7633	0.18	31	0.333333
69714	69714	Tfpt	17.88	14.45	15.87	17.82	17.1	16.18	35.55	28.84	31.31	35.62	34.43	32.55	288	232	256	277	270	253	16.0667	17.0333	31.9	34.2	258.667	266.667
68920	68920	1110065P20Rik	27.83	28.31	22.84	23.05	20.75	21.49	55.34	56.51	45.07	46.07	41.77	43.22	245.52	246.46	205.04	199.04	183.12	186.92	26.3267	21.7633	52.3067	43.6867	232.34	189.693
19181	19181	Psmc2	114.44	109.9	109.35	125.61	121.66	127.92	227.58	219.36	215.78	251.02	244.97	257.31	2478	2369	2372	2612	2583	2689	111.23	125.063	220.907	251.1	2406.33	2628
69994	69994	Rsc1a1	1.1	0.9	0.62	0.77	1.82	0.27	2.19	1.79	1.22	1.54	3.67	0.54	37.75	30.84	21.24	25.33	61.09	8.9	0.873333	0.953333	1.73333	1.91667	29.9433	31.7733
268949	268949	Mucl3	0.13	0.22	0.09	0.03	0.03	0.1	0.25	0.43	0.19	0.07	0.07	0.2	4	8	3	1	1	3	0.146667	0.0533333	0.29	0.113333	5	1.66667
11853	11853	Rhoc	364.86	360.55	368.38	342.63	329.16	327.27	725.58	719.65	726.94	684.72	662.77	658.28	5227	5147	5318	4737	4641	4558	364.597	333.02	724.057	668.59	5230.67	4645.33
231380	231380	Uba6	35.9	38.07	29.79	39.37	40.32	40.3	71.4	75.99	58.79	78.68	81.18	81.06	3157	3351	2622	3318	3456	3439	34.5867	39.9967	68.7267	80.3067	3043.33	3404.33
381104	381104	Prickle4	0.97	0.9	1.36	1.34	0.9	0.68	1.94	1.79	2.69	2.68	1.81	1.37	21	19	30	27	18	14	1.07667	0.973333	2.14	1.95333	23.3333	19.6667
100043772	100043772	Zfp850	1.75	1.49	1.4	1.94	2.03	2.51	3.48	2.98	2.76	3.87	4.08	5.06	132	106	108	131	140	176	1.54667	2.16	3.07333	4.33667	115.333	149
67681	67681	Mrpl18	58.27	50.71	58.58	66.17	63.53	63.6	115.87	101.22	115.6	132.24	127.93	127.93	692.59	627.27	722.46	799.1	796.62	770.68	55.8533	64.4333	110.897	129.367	680.773	788.8
66128	66128	Mrps36	33.65	35.78	38.01	34.98	38.99	36.33	66.92	71.42	75.01	69.91	78.5	73.07	273	288	312.71	275.81	314	287	35.8133	36.7667	71.1167	73.8267	291.237	292.27
70238	70238	Rnf168	7.06	7.09	7.12	8.88	8.74	8.68	14.04	14.16	14.05	17.75	17.59	17.45	540	543	545	651	651.45	644	7.09	8.76667	14.0833	17.5967	542.667	648.817
72667	72667	Zfp444	6.3	6.74	5.69	5.8	6.65	6.21	12.52	13.45	11.22	11.58	13.39	12.49	186	210	161	180	211	180	6.24333	6.22	12.3967	12.4867	185.667	190.333
100041579	100041579	Gm20878	0	0.68	0.31	0.24	0	0	0	1.35	0.6	0.47	0	0	0	1.37	0.67	0.5	0	0	0.33	0.08	0.65	0.156667	0.68	0.166667
15467	15467	Eif2ak1	20	19.76	20.25	19.73	18.42	18.72	39.77	39.44	39.96	39.44	37.1	37.65	909	897	923	855	813	822	20.0033	18.9567	39.7233	38.0633	909.667	830
109323	109323	C1qtnf7	1.59	2.3	2.51	0.23	0.38	0.19	3.16	4.59	4.96	0.45	0.76	0.39	43	75	74	4	10	6	2.13333	0.266667	4.23667	0.533333	64	6.66667
194738	194738	Rhox11	0	0.1	0	0	0	0	0	0.21	0	0	0	0	0	1	0	0	0	0	0.0333333	0	0.07	0	0.333333	0
328092	328092	Dtd2	6.85	7.11	6.07	6.58	8.09	8.77	13.62	14.2	11.98	13.15	16.29	17.64	197	208	167	197	239	232	6.67667	7.81333	13.2667	15.6933	190.667	222.667
20719	20719	Serpinb6a	362.66	338.41	326.23	282.95	273.92	272.7	721.2	675.45	643.76	565.44	551.54	548.51	7740.03	7202.01	6999.09	5820.14	5731.31	5657.1	342.433	276.523	680.137	555.163	7313.71	5736.18
14950	14950	H13	95.67	85.08	90.65	74.87	76.24	73.59	190.26	169.82	178.88	149.63	153.5	148.02	3497	3184	3329	2685	2752	2612	90.4667	74.9	179.653	150.383	3336.67	2683
52635	52635	Esyt2	74.92	68.6	68.8	78.16	80.02	82.24	148.99	136.93	135.77	156.19	161.13	165.42	7378	6809	6821	7656	8009	8191	70.7733	80.14	140.563	160.913	7002.67	7952
12497	12497	Entpd6	6.49	8.29	7.23	9.36	9.3	9.49	12.91	16.54	14.26	18.71	18.72	19.09	274	352	305	373	378	383	7.33667	9.38333	14.57	18.84	310.333	378
217371	217371	Rab40b	0.72	0.65	0.51	0.43	0.6	0.57	1.44	1.31	1.02	0.86	1.2	1.14	21	19	15	12	17	16	0.626667	0.533333	1.25667	1.06667	18.3333	15
226562	226562	Prrc2c	39.12	39.47	39.84	45.66	46.93	46.31	77.79	78.79	78.62	91.24	94.49	93.16	6994	7053	7118	7823	8185	8035	39.4767	46.3	78.4	92.9633	7055	8014.33
194237	194237	Rimkla	0.03	0.01	0.04	0.02	0.03	0.03	0.06	0.03	0.09	0.03	0.06	0.06	2	1	3	1	2	2	0.0266667	0.0266667	0.06	0.05	2	1.66667
67465	67465	Sf3a1	27.35	26.05	27.81	31.55	31.01	32.74	54.4	52	54.88	63.04	62.45	65.85	2315	2207	2356	2559	2559	2689	27.07	31.7667	53.76	63.78	2292.67	2602.33
17357	17357	Marcksl1	59.64	48.86	67.84	75.22	78.53	72.44	118.61	97.52	133.88	150.31	158.13	145.71	1446	1183	1652	1754	1865	1706	58.78	75.3967	116.67	151.383	1427	1775
73458	73458	Aldh3b3	0	0	0	0	0	0.05	0	0	0	0	0	0.11	0	0	0	0	0	1	0	0.0166667	0	0.0366667	0	0.333333
209176	209176	Ido2	0.16	0.23	0.3	0.24	0.17	0.15	0.31	0.45	0.59	0.49	0.34	0.31	9	13	12	14	8	8	0.23	0.186667	0.45	0.38	11.3333	10
12988	12988	Csk	39.66	38.16	39.52	44.3	42.54	42.11	78.87	76.17	77.99	88.54	85.65	84.7	1510	1444	1479	1612	1561	1554	39.1133	42.9833	77.6767	86.2967	1477.67	1575.67
74241	74241	Chpf	38.16	39.89	38.53	30.57	29.99	27.67	75.89	79.62	76.04	61.1	60.39	55.66	1962	2054	1987	1510	1506	1383	38.86	29.41	77.1833	59.05	2001	1466.33
109637	109637	Upk1a	0.32	0.64	0.37	0.44	0.16	0.54	0.63	1.27	0.73	0.88	0.33	1.09	6	12	7	8	3	10	0.443333	0.38	0.876667	0.766667	8.33333	7
19017	19017	Ppargc1a	0.09	0.07	0.12	0.04	0.02	0.02	0.18	0.14	0.23	0.07	0.04	0.04	8	8	13	4	2	2	0.0933333	0.0266667	0.183333	0.05	9.66667	2.66667
19309	19309	Pygm	0.15	0.04	0.11	0.18	0.13	0.11	0.29	0.08	0.21	0.35	0.26	0.22	7	2	5	8	6	5	0.1	0.14	0.193333	0.276667	4.66667	6.33333
109731	109731	Maob	8.94	9	7.59	1.71	1.7	1.64	17.79	17.96	14.98	3.41	3.43	3.29	349	351	297	64	65	62	8.51	1.68333	16.91	3.37667	332.333	63.6667
93960	93960	Nkd1	0.56	0.92	0.71	0.78	0.91	0.84	1.12	1.84	1.41	1.56	1.83	1.69	36	57	48	44	55	49	0.73	0.843333	1.45667	1.69333	47	49.3333
11611	11611	Agxt	0.04	0	0	0	0	0	0.09	0	0	0	0	0	1	0	0	0	0	0	0.0133333	0	0.03	0	0.333333	0
66257	66257	Nicn1	11.04	11.7	12.37	10.73	10.32	11.56	21.96	23.36	24.42	21.43	20.79	23.25	372	394	418	347	340	378	11.7033	10.87	23.2467	21.8233	394.667	355
15551	15551	Htr1b	31.92	26.8	26.74	39.53	41.98	41.5	63.48	53.49	52.76	78.99	84.52	83.46	2591	2175	2172	3070	3315	3262	28.4867	41.0033	56.5767	82.3233	2312.67	3215.67
56436	56436	Adrm1	89.1	78.77	86.53	96.01	96.33	94.44	177.18	157.23	170.74	191.86	193.97	189.95	1894	1676	1852	1968	2006	1950	84.8	95.5933	168.383	191.927	1807.33	1974.67
235283	235283	Gramd1b	3.81	4.95	5.15	2.2	2.02	1.75	7.58	9.88	10.16	4.39	4.07	3.53	457.38	640.47	641.88	247.85	243.69	227.75	4.63667	1.99	9.20667	3.99667	579.91	239.763
232201	232201	Arhgap25	1	1.58	1.89	0	0.04	0.02	2	3.15	3.73	0	0.07	0.04	58	94	113	0	2	1	1.49	0.02	2.96	0.0366667	88.3333	1
216622	216622	4931440F15Rik	0	0.02	0	0.04	0.04	0	0	0.04	0	0.08	0.08	0	0	1	0	2	2	0	0.00666667	0.0266667	0.0133333	0.0533333	0.333333	1.33333
14297	14297	Fxn	2.51	1.62	1.9	3.3	3.27	3.04	4.99	3.24	3.75	6.6	6.58	6.11	125	81	95	158	159.12	147.01	2.01	3.20333	3.99333	6.43	100.333	154.71
73121	73121	Rflna	0	0.04	0.19	0.12	0.16	0.04	0	0.08	0.38	0.24	0.32	0.08	0	1	5	3	4	1	0.0766667	0.106667	0.153333	0.213333	2	2.66667
216795	216795	Wnt9a	2.99	3.34	2.7	2	1.97	2.02	5.95	6.66	5.32	4	3.98	4.06	167	186	150	107	107	109	3.01	1.99667	5.97667	4.01333	167.667	107.667
224805	224805	Aars2	3.98	4.21	4.09	4.26	4.94	4.8	7.92	8.4	8.08	8.5	9.95	9.65	223	238	233	230	270	262	4.09333	4.66667	8.13333	9.36667	231.333	254
235132	235132	Zbtb44	2.97	2.85	2.78	1.99	2.27	2.45	5.91	5.69	5.49	3.98	4.57	4.92	473	456	447.95	310	357	380	2.86667	2.23667	5.69667	4.49	458.983	349
668166	668166	Zxdb	3.4	3.04	3.33	2.92	3.03	3.17	6.77	6.07	6.57	5.84	6.1	6.38	332	297	325	273	288	300	3.25667	3.04	6.47	6.10667	318	287
625662	625662	Ankrd31	0	0	0	0.01	0	0	0	0	0	0.02	0	0	0	0	0	1	0	0	0	0.00333333	0	0.00666667	0	0.333333
18807	18807	Pld3	82.39	92.41	89.9	49.18	49.56	51.31	163.83	184.45	177.41	98.28	99.78	103.2	3053	3415	3336	1761	1811	1847	88.2333	50.0167	175.23	100.42	3268	1806.33
108169105	108169105	LOC108169105	0.19	0.09	0.18	0.32	0.25	0.19	0.37	0.17	0.37	0.65	0.51	0.39	3	2	4	5	5	3	0.153333	0.253333	0.303333	0.516667	3	4.33333
208968	208968	Zfp280c	7.76	7.23	7.34	7.37	7.64	7.46	15.43	14.43	14.49	14.73	15.39	15	577	530	541	525	548	547	7.44333	7.49	14.7833	15.04	549.333	540
353242	353242	Mrpl21	38.68	35	36.22	39.39	45.85	44.86	76.93	69.86	71.47	78.73	92.32	90.23	389	350	368	383	455	439	36.6333	43.3667	72.7533	87.0933	369	425.667
12984	12984	Csf2rb2	1.01	1.6	3.05	0.12	0.04	0.04	2.01	3.2	6.02	0.24	0.08	0.08	80.76	127	248.46	9.41	3	3	1.88667	0.0666667	3.74333	0.133333	152.073	5.13667
100972	100972	Rab28	26.19	31.07	26.16	27.3	30.24	28.42	52.09	62.02	51.62	54.55	60.89	57.16	549	611	533	550	571	552	27.8067	28.6533	55.2433	57.5333	564.333	557.667
105242433	105242433	Gm38702	0.23	0.28	0.21	0.6	0.4	0.21	0.45	0.57	0.42	1.2	0.8	0.43	8.38	10.53	7.94	21.44	14.32	7.6	0.24	0.403333	0.48	0.81	8.95	14.4533
107723	107723	Slc12a6	7.91	8.39	7.68	6.28	6.17	6.26	15.73	16.74	15.15	12.55	12.43	12.59	903	946	870	672	673	685	7.99333	6.23667	15.8733	12.5233	906.333	676.667
381582	381582	Tmem240	0.25	0.2	0.15	0.21	0	0.15	0.49	0.4	0.29	0.41	0	0.31	5	4	3	4	0	3	0.2	0.12	0.393333	0.24	4	2.33333
17828	17828	Bloc1s5	5.66	7.42	5.28	5.92	6.39	5.98	11.25	14.8	10.41	11.83	12.86	12.02	154	204	146	155	171	159	6.12	6.09667	12.1533	12.2367	168	161.667
12260	12260	C1qb	15.47	32.23	35.95	0	0	0	30.76	64.33	70.93	0	0	0	235	488	550	0	0	0	27.8833	0	55.34	0	424.333	0
68750	68750	Rreb1	5.82	6.31	5.84	4.52	4.4	4.28	11.58	12.59	11.52	9.04	8.85	8.6	888	953	880	651	646	627	5.99	4.4	11.8967	8.83	907	641.333
16880	16880	Lifr	1.87	2.49	2.06	2.42	2.2	2.15	3.72	4.97	4.07	4.84	4.44	4.33	293	415	312	309	316	300	2.14	2.25667	4.25333	4.53667	340	308.333
26440	26440	Psma1	88.45	82.47	95.34	104.59	103.38	103.12	175.9	164.61	188.15	209.01	208.16	207.42	1587	1476	1721	1808	1821	1798	88.7533	103.697	176.22	208.197	1594.67	1809
17698	17698	Msn	482.55	438.5	457.86	439.5	439.35	440.3	959.61	875.23	903.53	878.3	884.64	885.61	31380	28537	29817	27406	27871	27792	459.637	439.717	912.79	882.85	29911.3	27689.7
97820	97820	4833439L19Rik	35.23	35.4	32.27	33.88	32.51	34.1	70.06	70.66	63.67	67.71	65.46	68.59	1488	1514	1360	1380	1355	1407	34.3	33.4967	68.13	67.2533	1454	1380.67
240121	240121	Fsd1	2.6	3.09	2.26	3.44	2.96	3.71	5.17	6.16	4.45	6.87	5.96	7.46	70	83	61	89	78	97	2.65	3.37	5.26	6.76333	71.3333	88
68845	68845	Pih1d1	23.78	23.95	22.3	26.94	25.07	25.76	47.3	47.81	44.01	53.83	50.47	51.8	375	374	352	410	389	391	23.3433	25.9233	46.3733	52.0333	367	396.667
105246049	105246049	Gm41408	0.17	0.11	0.26	0.04	0.11	0.11	0.33	0.22	0.51	0.08	0.23	0.23	9.2	6.04	14.22	2.04	6.07	6.1	0.18	0.0866667	0.353333	0.18	9.82	4.73667
330963	330963	Ankdd1a	0.04	0.03	0.03	0.05	0.05	0.01	0.08	0.06	0.06	0.1	0.09	0.02	4	3	3	4	4	1	0.0333333	0.0366667	0.0666667	0.07	3.33333	3
106039	106039	Gga1	17.76	19.67	18.42	20.13	18.79	18.19	35.31	39.26	36.34	40.23	37.84	36.58	894	991	929	973	924	889	18.6167	19.0367	36.97	38.2167	938	928.667
17105	17105	Lyz2	1009.5	1416.9	1744.2	11.71	14.11	13.06	2007.53	2828.07	3441.92	23.4	28.41	26.27	14471	20237	25195	162	199	182	1390.2	12.96	2759.17	26.0267	19967.7	181
22030	22030	Traf2	8.08	8.79	8.29	6.69	6.26	6.31	16.08	17.55	16.36	13.37	12.59	12.69	415	447	426	327	311	314	8.38667	6.42	16.6633	12.8833	429.333	317.333
321000	321000	Lrif1	8.64	8.87	7.85	7.13	7.8	6.78	17.19	17.71	15.49	14.25	15.7	13.64	341	363	319	317	347	292	8.45333	7.23667	16.7967	14.53	341	318.667
170952	170952	Prima1	0	0.02	0.02	0.1	0	0.05	0	0.03	0.03	0.19	0	0.11	0	1	1	3	0	3	0.0133333	0.05	0.02	0.1	0.666667	2
213469	213469	Lgi3	0.21	0.21	0.19	0.24	0.27	0.43	0.41	0.41	0.37	0.47	0.54	0.86	11	11	10	12	14	22	0.203333	0.313333	0.396667	0.623333	10.6667	16
20723	20723	Serpinb9	4.22	4.65	4.18	6.1	5.33	5.59	8.38	9.27	8.24	12.18	10.74	11.25	167	193	167	231	214	237	4.35	5.67333	8.63	11.39	175.667	227.333
234875	234875	Ttc13	30.04	30.67	29.27	27.71	26.83	27.45	59.74	61.22	57.77	55.37	54.02	55.22	1588	1627	1569	1394	1370	1404	29.9933	27.33	59.5767	54.87	1594.67	1389.33
215113	215113	Slc43a2	3.28	4.85	6.19	0.73	0.78	0.82	6.53	9.69	12.22	1.47	1.57	1.65	325	465	623	58	66	63	4.77333	0.776667	9.48	1.56333	471	62.3333
231413	231413	Grsf1	34.14	32.59	33.31	31.68	32.68	33.51	67.9	65.04	65.73	63.31	65.81	67.4	1455	1385	1408	1303	1354	1393	33.3467	32.6233	66.2233	65.5067	1416	1350
67199	67199	Pfdn1	58.98	53.87	60.98	55.49	58.09	55.29	117.3	107.51	120.33	110.89	116.97	111.2	867	789	903	787	840	790	57.9433	56.29	115.047	113.02	853	805.667
380967	380967	Tmem106c	16.28	18.36	15.22	16.64	15.1	16.4	32.37	36.65	30.04	33.26	30.4	32.98	371	418	346	365	333	363	16.62	16.0467	33.02	32.2133	378.333	353.667
17134	17134	Mafg	28.52	26.24	29.24	34.4	33.56	34.18	56.71	52.36	57.7	68.75	67.57	68.75	2465	2381	2436	2750	2665	2755	28	34.0467	55.59	68.3567	2427.33	2723.33
66673	66673	Sorcs3	0	0	0	0	0	0.01	0	0	0	0	0	0.02	0	0	0	0	0	1	0	0.00333333	0	0.00666667	0	0.333333
18430	18430	Oxtr	0.01	0.01	0.03	0.03	0.03	0.01	0.03	0.03	0.07	0.05	0.05	0.03	1	1	3	2	2	1	0.0166667	0.0233333	0.0433333	0.0433333	1.66667	1.66667
98053	98053	Gtf2f1	65.67	61.31	68.79	65.63	61.83	64.18	130.59	122.37	135.75	131.15	124.5	129.1	1763	1638	1856	1698	1622	1672	65.2567	63.88	129.57	128.25	1752.33	1664
77596	77596	Adgrf1	0	0	0	0.02	0	0	0	0	0	0.04	0	0	0	0	0	1	0	0	0	0.00666667	0	0.0133333	0	0.333333
11733	11733	Ank1	0.48	0.67	0.56	0.71	0.81	0.87	0.95	1.33	1.11	1.43	1.64	1.75	71	97	84	89	116	121	0.57	0.796667	1.13	1.60667	84	108.667
17940	17940	Naip1	0.04	0.01	0.03	0	0.02	0	0.09	0.02	0.06	0	0.04	0	4	1	3	0	2	0	0.0266667	0.00666667	0.0566667	0.0133333	2.66667	0.666667
13845	13845	Ephb3	7	10.05	5.9	4.33	3.99	4.23	13.91	20.05	11.64	8.65	8.04	8.51	494	710	417	293	275	290	7.65	4.18333	15.2	8.4	540.333	286
211948	211948	Pde12	10.51	10.39	10.56	10.42	11.17	10.13	20.9	20.73	20.84	20.81	22.49	20.38	624	617	628	593	647	584	10.4867	10.5733	20.8233	21.2267	623	608
72040	72040	Cdhr5	0	0	0.03	0	0	0	0	0	0.06	0	0	0	0	0	1	0	0	0	0.01	0	0.02	0	0.333333	0
67902	67902	Sumf2	13.24	12.84	13.54	13.15	13.81	13.63	26.33	25.62	26.73	26.28	27.8	27.42	455.98	441.99	467.9	434.99	465	455.99	13.2067	13.53	26.2267	27.1667	455.29	451.993
74493	74493	Tnks2	35.43	34.65	33.63	32.36	33.31	33.29	70.46	69.17	66.37	64.66	67.07	66.96	3982	3904	3774	3479	3645	3634	34.57	32.9867	68.6667	66.23	3886.67	3586
234839	234839	Piezo1	116.88	105.67	114.07	145.16	142.92	141.75	232.44	210.92	225.11	290.08	287.78	285.11	14628	13060.3	14137.6	17531.8	17387.7	17280.1	112.207	143.277	222.823	287.657	13942	17399.8
66634	66634	Mcm8	2.65	2.38	2.65	3.62	4.33	4.83	5.27	4.74	5.22	7.23	8.71	9.71	155	139	155	203	247	274	2.56	4.26	5.07667	8.55	149.667	241.333
192678	192678	Rassf3	11.71	12.17	12.83	4.05	4.27	4.28	23.28	24.3	25.33	8.08	8.6	8.62	667	690	739	223	237	239	12.2367	4.2	24.3033	8.43333	698.667	233
232035	232035	Ccser1	0.21	0.39	0.22	0.1	0.23	0.09	0.43	0.77	0.42	0.2	0.46	0.17	14	27	14	8	16	5	0.273333	0.14	0.54	0.276667	18.3333	9.66667
433938	433938	Mn1	5.89	5.61	5.54	3.41	3.39	3.54	11.71	11.2	10.94	6.81	6.82	7.11	705	673	664	391	395	411	5.68	3.44667	11.2833	6.91333	680.667	399
63872	63872	Zfp296	0.96	0.87	0.87	0.76	0.4	0.54	1.91	1.74	1.71	1.52	0.81	1.08	22	20	20	16	9	12	0.9	0.566667	1.78667	1.13667	20.6667	12.3333
381760	381760	Ssbp1	23.96	22.07	24.48	25.8	24.4	24.05	47.64	44.05	48.3	51.55	49.14	48.38	469	454	515	508	487	487	23.5033	24.75	46.6633	49.69	479.333	494
18994	18994	Pou3f4	0.64	0.53	0.69	0.26	0.43	0.25	1.27	1.06	1.36	0.51	0.86	0.51	52	43	56	20	34	20	0.62	0.313333	1.23	0.626667	50.3333	24.6667
320817	320817	Atad2b	4.2	4.66	4.13	3.96	3.72	3.71	8.35	9.3	8.16	7.91	7.48	7.46	578	640	579	521	487	495	4.33	3.79667	8.60333	7.61667	599	501
13419	13419	Dnase1	0.05	0	0.05	0.2	0.1	0.05	0.11	0	0.1	0.4	0.2	0.1	1	0	1	4	2	1	0.0333333	0.116667	0.07	0.233333	0.666667	2.33333
18263	18263	Odc1	96.9	88.89	103.51	166.94	160.2	161.96	192.71	177.41	204.27	333.62	322.56	325.76	4024	3692	4309	6653	6497	6530	96.4333	163.033	191.463	327.313	4008.33	6560
22608	22608	Ybx1	475.42	441.04	475.29	450.11	454.09	447.89	945.44	880.3	937.92	899.5	914.31	900.88	16775	15552	16793	15250	15628	15347	463.917	450.697	921.22	904.897	16373.3	15408.3
13486	13486	Dr1	21.2	21.6	20.67	17.68	19.63	19.88	42.15	43.11	40.79	35.32	39.53	39.99	1085	1106	1060	868	981	988	21.1567	19.0633	42.0167	38.28	1083.67	945.667
76485	76485	Glt8d1	15.86	19.03	14.85	15.81	16.38	15.54	31.54	37.98	29.31	31.59	32.99	31.25	444.22	528.14	418.23	421.21	445.16	406.22	16.58	15.91	32.9433	31.9433	463.53	424.197
72674	72674	Adipor1	63.92	58.95	62.55	52.6	51.74	51.21	127.12	117.66	123.43	105.12	104.18	103.01	3377	3111	3307	2661	2660	2615	61.8067	51.85	122.737	104.103	3265	2645.33
16184	16184	Il2ra	0.03	0.01	0	0	0	0	0.05	0.03	0	0	0	0	2	1	0	0	0	0	0.0133333	0	0.0266667	0	1	0
626832	626832	Gm6710	3.21	2.83	3.2	2.37	2.83	2.4	6.39	5.64	6.31	4.73	5.7	4.82	242.7	226.5	242.12	183.2	211.53	183.53	3.08	2.53333	6.11333	5.08333	237.107	192.753
66664	66664	Tmem41a	7.56	6.62	7.62	6.96	8.48	6.85	15.04	13.21	15.04	13.92	17.07	13.78	150	131	152	133	165	132	7.26667	7.43	14.43	14.9233	144.333	143.333
27354	27354	Nbn	14.98	12.94	14.12	15.38	15.01	14.36	29.8	25.83	27.86	30.73	30.22	28.88	616	537	581	610	609	584	14.0133	14.9167	27.83	29.9433	578	601
12387	12387	Ctnnb1	204.48	206.09	217.28	195.91	192.57	194.18	406.63	411.35	428.78	391.5	387.74	390.57	12485	12505	13199	11475	11450	11496	209.283	194.22	415.587	389.937	12729.7	11473.7
72119	72119	Tpx2	44.75	39.61	47.39	49.45	49.47	55.25	88.99	79.05	93.53	98.83	99.6	111.13	2526	2233	2715	2661	2751	3039	43.9167	51.39	87.19	103.187	2491.33	2817
69514	69514	Lce3e	0	0	0	0	0	0.17	0	0	0	0	0	0.34	0	0	0	0	0	1	0	0.0566667	0	0.113333	0	0.333333
19015	19015	Ppard	14.92	14.5	16.15	13.03	11.81	12.7	29.66	28.94	31.88	26.03	23.78	25.54	801	779	869	671	619	662	15.19	12.5133	30.16	25.1167	816.333	650.667
12581	12581	Cdkn2d	10.17	13.98	11.47	7.57	7.42	7.02	20.22	27.91	22.63	15.13	14.93	14.13	185	254	210	133	132	124	11.8733	7.33667	23.5867	14.73	216.333	129.667
76055	76055	Oga	32.87	31.84	31.2	47.53	47.76	48.84	65.36	63.55	61.56	94.98	96.17	98.23	2842	2759	2700	3928	4013	4096	31.97	48.0433	63.49	96.46	2767	4012.33
22648	22648	Zfp11	1.19	1.53	1.14	1.26	1.53	1.15	2.37	3.06	2.24	2.51	3.08	2.31	79	102	75.61	80	99	74.18	1.28667	1.31333	2.55667	2.63333	85.5367	84.3933
18227	18227	Nr4a2	4.35	5.31	4.6	3.35	4.26	3.83	8.66	10.59	9.07	6.69	8.57	7.71	235	285	250	176	225	202	4.75333	3.81333	9.44	7.65667	256.667	201
66768	66768	Pacrgl	5.84	5.85	5.44	6.26	6.66	6.34	11.61	11.68	10.74	12.51	13.41	12.76	127	127	119	131	142	134	5.71	6.42	11.3433	12.8933	124.333	135.667
237940	237940	Aoc2	1.56	2.04	1.63	2.6	2.59	2.6	3.11	4.08	3.22	5.2	5.21	5.22	77	106	86	134	135	141	1.74333	2.59667	3.47	5.21	89.6667	136.667
226646	226646	Ndufs2	125.71	123.04	122	120.78	119.39	120.5	250	245.58	240.75	241.37	240.39	242.38	3119.64	3050.54	3043.61	2877.68	2895.07	2901.41	123.583	120.223	245.443	241.38	3071.26	2891.39
15416	15416	Hoxb8	5.23	5.18	4.99	2.65	2.45	2.07	10.39	10.34	9.85	5.3	4.94	4.15	200	203	189	101	93	79	5.13333	2.39	10.1933	4.79667	197.333	91
382090	382090	Cep162	4.67	6.19	4.72	5.55	5.92	5.56	9.29	12.35	9.32	11.09	11.92	11.19	437	578	442	466	540	511	5.19333	5.67667	10.32	11.4	485.667	505.667
13853	13853	Epm2a	0.88	0.68	0.81	0.14	0.41	0.42	1.75	1.36	1.6	0.28	0.83	0.84	13	10	12	2	6	6	0.79	0.323333	1.57	0.65	11.6667	4.66667
237859	237859	Nsrp1	8.74	9.25	9.28	7.78	8.02	7.37	17.38	18.47	18.31	15.55	16.15	14.83	453	480	482	387	406	371	9.09	7.72333	18.0533	15.51	471.667	388
620695	620695	Gm13889	0.43	0.11	0.16	0.28	0.16	0.33	0.86	0.22	0.32	0.56	0.33	0.67	8	2	3	5	3	6	0.233333	0.256667	0.466667	0.52	4.33333	4.66667
240476	240476	Zfp407	3.77	3.93	3.82	4	4.27	3.95	7.5	7.85	7.55	8	8.6	7.94	529	555	539	541	589	542	3.84	4.07333	7.63333	8.18	541	557.333
20324	20324	Cavin2	99.68	62.19	110.88	63.65	64.34	65.53	198.24	124.12	218.82	127.2	129.54	131.8	5057	3156	5636	3098	3186	3227	90.9167	64.5067	180.393	129.513	4616.33	3170.33
320080	320080	Zbtb39	2.89	2.86	3.21	2.98	3.17	3.71	5.75	5.7	6.33	5.95	6.39	7.47	300	297	333	296	321	374	2.98667	3.28667	5.92667	6.60333	310	330.333
50778	50778	Rgs1	0.62	1.19	1.29	0.05	0.05	0.05	1.24	2.38	2.54	0.11	0.11	0.11	12	23	25	1	1	1	1.03333	0.05	2.05333	0.11	20	1
67017	67017	Fam210b	4.83	5.12	4.32	3.91	3.59	3.67	9.6	10.21	8.53	7.81	7.24	7.37	276	311	263	199	213	205	4.75667	3.72333	9.44667	7.47333	283.333	205.667
235631	235631	Prss50	0.19	0.32	0.37	0	0.1	0	0.37	0.65	0.73	0	0.19	0	4	7	8	0	2	0	0.293333	0.0333333	0.583333	0.0633333	6.33333	0.666667
14792	14792	Lpcat3	17.58	19.94	19.75	18.22	17.06	15.71	34.96	39.79	38.98	36.41	34.36	31.6	714.66	810.56	805	710.99	677.75	620.15	19.09	16.9967	37.91	34.1233	776.74	669.63
93890	93890	Pcdhb19	0.59	0.64	0.64	0.57	0.84	0.73	1.18	1.28	1.27	1.13	1.68	1.46	48	52	52	44	66	57	0.623333	0.713333	1.24333	1.42333	50.6667	55.6667
74237	74237	Tubgcp2	10.71	11.78	11.68	19.76	19.91	19.91	21.29	23.52	23.05	39.49	40.08	40.05	553.78	603	603.12	969.74	999.12	990.02	11.39	19.86	22.62	39.8733	586.633	986.293
70737	70737	Cgn	0.36	0.48	0.59	0.17	0.25	0.22	0.71	0.95	1.17	0.34	0.51	0.44	29	41	51	14	21	18	0.476667	0.213333	0.943333	0.43	40.3333	17.6667
66912	66912	Bzw2	39.86	40.19	40.82	54.09	53.8	51.59	79.28	80.22	80.56	108.09	108.33	103.77	1272.72	1299.93	1314	1640.85	1668.02	1592.37	40.29	53.16	80.02	106.73	1295.55	1633.75
98365	98365	Slamf9	1	1.51	0.69	0.46	0.57	0.47	2	3.01	1.35	0.91	1.16	0.94	16	24	11	7	9	7	1.06667	0.5	2.12	1.00333	17	7.66667
27414	27414	Sergef	4.6	4.25	4.55	6.37	8.17	6.43	9.15	8.49	8.97	12.73	16.45	12.94	132	136	125	160.34	203	168	4.46667	6.99	8.87	14.04	131	177.113
73490	73490	Mipol1	3.43	4.66	3.18	6.79	6.4	5.44	6.82	9.3	6.28	13.58	12.89	10.94	74	100.27	69	141	135.31	114	3.75667	6.21	7.46667	12.47	81.09	130.103
50780	50780	Rgs3	9.96	13.88	8.57	5.77	5.4	5.52	19.8	27.71	16.91	11.53	10.88	11.1	389	540	345	240	226	234	10.8033	5.56333	21.4733	11.17	424.667	233.333
103724	103724	Tbc1d10a	14.28	13.07	13.57	12.78	12.22	11.34	28.4	26.1	26.78	25.55	24.61	22.81	452	406	434	379	371	354	13.64	12.1133	27.0933	24.3233	430.667	368
70843	70843	Krt28	0.05	0	0	0	0	0	0.09	0	0	0	0	0	1	0	0	0	0	0	0.0166667	0	0.03	0	0.333333	0
67678	67678	Lsm3	49.27	42.72	50.98	67.26	66.68	68.2	97.99	85.27	100.61	134.41	134.26	137.18	324	278	341	431	437	437	47.6567	67.38	94.6233	135.283	314.333	435
72535	72535	Aldh1b1	1.16	1.49	1.21	1.77	1.19	1.67	2.31	2.97	2.39	3.54	2.39	3.36	43	55	45	63	43	60	1.28667	1.54333	2.55667	3.09667	47.6667	55.3333
327959	327959	Xaf1	0.5	1.41	0.93	1.3	0.92	2.02	0.99	2.81	1.84	2.59	1.86	4.07	24	54.01	35	41	41	68	0.946667	1.41333	1.88	2.84	37.67	50
115486489	115486489	LOC115486489	0.03	0.03	0	0	0.03	0	0.05	0.05	0	0	0.06	0	1	1	0	0	1	0	0.02	0.01	0.0333333	0.02	0.666667	0.333333
68520	68520	Zfyve21	15.39	15.69	15.17	14.38	13.03	11.85	30.6	31.31	29.94	28.74	26.23	23.84	294	298	291	265	245	220	15.4167	13.0867	30.6167	26.27	294.333	243.333
72287	72287	Plekhf1	19.98	19.11	20.27	26.12	25.17	25.96	39.72	38.14	39.99	52.2	50.68	52.21	469	448	478	590	579	592	19.7867	25.75	39.2833	51.6967	465	587
105246572	105246572	Gm41844	4.45	3.77	2.94	3.7	3.5	2.59	8.84	7.52	5.81	7.4	7.05	5.21	109.37	92.49	72.66	87.58	84.28	61.83	3.72	3.26333	7.39	6.55333	91.5067	77.8967
109218	109218	Tmem139	0	0.25	0	0	0.06	0	0	0.5	0	0	0.13	0	0	4	0	0	1	0	0.0833333	0.02	0.166667	0.0433333	1.33333	0.333333
13559	13559	E2f5	6.85	6.52	6.85	7.09	8.48	7.62	13.61	13.02	13.52	14.18	17.07	15.33	186	176	186	185	225	201	6.74	7.73	13.3833	15.5267	182.667	203.667
22286	22286	Utf1	0	0	0	0	0.06	0	0	0	0	0	0.13	0	0	0	0	0	1	0	0	0.02	0	0.0433333	0	0.333333
224893	224893	Zfp959	2.55	2.11	2.31	2.97	2.33	2.62	5.08	4.21	4.55	5.94	4.69	5.27	88.46	79	89	106	84	89	2.32333	2.64	4.61333	5.3	85.4867	93
70078	70078	Nol7	22.3	21.36	22.48	22.79	24.97	24.28	44.35	42.63	44.37	45.55	50.28	48.84	626	599	633.48	615	686	662	22.0467	24.0133	43.7833	48.2233	619.493	654.333
74286	74286	Tbc1d21	0	0	0.16	0.09	0	0.09	0	0	0.32	0.17	0	0.17	0	0	2	1	0	1	0.0533333	0.06	0.106667	0.113333	0.666667	0.666667
434437	434437	Amt	1.63	1.66	1.74	0.93	1.43	0.74	3.24	3.32	3.43	1.86	2.88	1.49	48	53	55	28	38	23	1.67667	1.03333	3.33	2.07667	52	29.6667
100041774	100041774	Gm10413	0	0.21	0	0	0	0.08	0	0.42	0	0	0	0.16	0	2.79	0	0	0	1	0.07	0.0266667	0.14	0.0533333	0.93	0.333333
100039794	100039794	Gm2427	0	0.02	0	0	0	0.02	0	0.05	0	0	0	0.05	0	1.01	0	0	0	1.01	0.00666667	0.00666667	0.0166667	0.0166667	0.336667	0.336667
78830	78830	Slc25a12	12.94	13.82	12.76	14.25	14.74	15.1	25.73	27.59	25.17	28.48	29.68	30.37	679	726	671	718	756	770	13.1733	14.6967	26.1633	29.51	692	748
74559	74559	Elovl7	0.18	0.2	0.2	0.21	0.31	0.32	0.36	0.4	0.4	0.42	0.61	0.64	17	19	19	19	28	29	0.193333	0.28	0.386667	0.556667	18.3333	25.3333
77125	77125	Il33	0.41	0.73	0.57	1.13	1.04	1.24	0.81	1.45	1.13	2.26	2.09	2.5	17	30	24	45	42	50	0.57	1.13667	1.13	2.28333	23.6667	45.6667
328370	328370	Rft1	8.79	10.84	9	10.89	10.49	10.32	17.49	21.63	17.77	21.75	21.13	20.75	345	422	353	408	403	393	9.54333	10.5667	18.9633	21.21	373.333	401.333
81879	81879	Tfcp2l1	0.07	0.09	0.04	0.04	0.02	0.04	0.15	0.19	0.07	0.08	0.04	0.08	12	15	6	6	3	6	0.0666667	0.0333333	0.136667	0.0666667	11	5
20502	20502	Slc16a2	8.27	16.33	8.11	4.88	4.89	4.8	16.44	32.59	16	9.74	9.85	9.65	586	1158	575	331	338	330	10.9033	4.85667	21.6767	9.74667	773	333
56453	56453	Mbtps1	47.8	55.36	47.69	50.17	49.63	50.3	95.05	110.49	94.11	100.27	99.93	101.16	3450	3997	3449	3471	3499	3521	50.2833	50.0333	99.8833	100.453	3632	3497
20873	20873	Plk4	10.59	9.6	11.19	18.98	18.67	19.44	21.07	19.16	22.09	37.93	37.6	39.11	632	572	668	1084	1085	1124	10.46	19.03	20.7733	38.2133	624	1097.67
216797	216797	Prss38	0	0	0.03	0	0	0	0	0	0.06	0	0	0	0	0	1	0	0	0	0.01	0	0.02	0	0.333333	0
14825	14825	Cxcl1	5.13	5.88	9.14	10.87	12.12	10.3	10.2	11.73	18.03	21.71	24.4	20.72	64	73	115	131	149	125	6.71667	11.0967	13.32	22.2767	84	135
546849	546849	AAdacl4fm3	0	0.05	0	0	0	0	0	0.11	0	0	0	0	0	1	0	0	0	0	0.0166667	0	0.0366667	0	0.333333	0
326619	326619	H4c1	1.17	0.61	0.28	0	1.96	0.69	2.34	1.22	0.56	0	3.95	1.39	4	2.03	1	0	6.79	2.31	0.686667	0.883333	1.37333	1.78	2.34333	3.03333
118445	118445	Klf16	14.38	13.09	13.82	21.04	21.31	21.03	28.6	26.13	27.27	42.04	42.9	42.3	624	568	601	876	903	886	13.7633	21.1267	27.3333	42.4133	597.667	888.333
23996	23996	Psmc4	100.19	100.28	104.28	123.22	119.53	113.84	199.25	200.16	205.78	246.25	240.68	228.98	2128	2126	2226	2519	2489	2349	101.583	118.863	201.73	238.637	2160	2452.33
20534	20534	Slc4a1ap	14.13	14.28	14.16	12.52	12.48	13.1	28.09	28.5	27.93	25.01	25.12	26.36	631	617	625	529	555	570	14.19	12.7	28.1733	25.4967	624.333	551.333
14089	14089	Fap	2.37	3.16	2.07	1.57	2.1	2.02	4.71	6.3	4.09	3.14	4.23	4.07	105	140	92	64	90	80	2.53333	1.89667	5.03333	3.81333	112.333	78
13609	13609	S1pr1	12.02	10.36	12.01	11.63	11.68	12.89	23.9	20.68	23.71	23.25	23.52	25.93	604	521	605	561	573	629	11.4633	12.0667	22.7633	24.2333	576.667	587.667
239250	239250	Slitrk6	1.79	1.95	2.22	0.23	0.31	0.4	3.55	3.9	4.38	0.46	0.63	0.8	133	143	164	17	23	29	1.98667	0.313333	3.94333	0.63	146.667	23
94219	94219	Cnnm2	2.6	3.17	2.54	1.78	1.87	1.67	5.16	6.32	5.01	3.56	3.77	3.37	147.14	179.41	142.94	95.99	104.89	94.04	2.77	1.77333	5.49667	3.56667	156.497	98.3067
73826	73826	Poldip3	28.45	28.81	29.17	31.53	33.45	32.79	56.58	57.5	57.57	63.01	67.34	65.95	1562	1584	1602	1661	1793	1747	28.81	32.59	57.2167	65.4333	1582.67	1733.67
12643	12643	Chad	0.27	0.16	0.23	0.08	0.04	0.04	0.54	0.31	0.46	0.16	0.08	0.08	7	4	6	2	1	1	0.22	0.0533333	0.436667	0.106667	5.66667	1.33333
15959	15959	Ifit3	3.75	3.95	3.17	2.12	1.55	1.77	7.46	7.87	6.26	4.25	3.12	3.57	114.87	121.91	98.63	63.92	47.64	53.86	3.62333	1.81333	7.19667	3.64667	111.803	55.14
53602	53602	Hpcal1	18.28	19.72	18.63	15.32	14.78	16.1	36.35	39.36	36.76	30.61	29.76	32.38	416	467.34	451	357.51	348	372	18.8767	15.4	37.49	30.9167	444.78	359.17
16782	16782	Lamc2	3.07	2.86	2.7	4.35	4.17	4.37	6.11	5.71	5.33	8.69	8.39	8.79	261	245	234	357	347	362	2.87667	4.29667	5.71667	8.62333	246.667	355.333
20683	20683	Sp1	11.94	12.94	11.76	15.73	15.76	16.41	23.75	25.83	23.21	31.44	31.73	33.01	1642	1782	1618	2072	2111	2190	12.2133	15.9667	24.2633	32.06	1680.67	2124.33
68135	68135	Eif3h	179.31	179.73	182.13	193.21	183.59	186.64	356.59	358.74	359.41	386.1	369.66	375.4	3129	3128	3198	3249	3146	3165	180.39	187.813	358.247	377.053	3151.67	3186.67
17993	17993	Ndufs4	30.23	28.49	28.92	29.93	26.82	29.55	60.12	56.87	57.07	59.81	54	59.44	696	655	669	663	605	661	29.2133	28.7667	58.02	57.75	673.333	643
330323	330323	Mindy4	1.58	1.62	1.16	1.1	1.14	1.41	3.14	3.23	2.3	2.2	2.3	2.83	69	95	52	61	51	63	1.45333	1.21667	2.89	2.44333	72	58.3333
73390	73390	Msl3l2	2.23	2.35	2.52	2.2	2.31	2.03	4.44	4.69	4.97	4.4	4.66	4.07	76	80	86	72	77	67	2.36667	2.18	4.7	4.37667	80.6667	72
23853	23853	Def6	5.86	6.84	6.8	4.79	3.86	3.32	11.66	13.65	13.42	9.56	7.78	6.69	215	251	250	168	138	118	6.5	3.99	12.91	8.01	238.667	141.333
94179	94179	Krt23	0.04	0.04	0	0	0	0	0.09	0.09	0	0	0	0	1	1	0	0	0	0	0.0266667	0	0.06	0	0.666667	0
78914	78914	Nadsyn1	1.44	1.78	1.83	1.43	1.32	1.17	2.86	3.55	3.62	2.86	2.66	2.35	55	67	70	49	50	49	1.68333	1.30667	3.34333	2.62333	64	49.3333
69596	69596	Ap5s1	5.83	6.25	5.58	3.31	2.97	3.24	11.59	12.46	11.02	6.62	5.97	6.51	140	150	136	76	70	75	5.88667	3.17333	11.69	6.36667	142	73.6667
26356	26356	Ing1	20.86	20.88	22.81	16.75	16.37	18.42	41.49	41.68	45.02	33.47	32.97	37.05	699	688	768	536	541	591	21.5167	17.18	42.73	34.4967	718.333	556
50935	50935	St6galnac6	15.68	16.75	14.85	10.32	11.39	11.09	31.18	33.43	29.31	20.63	22.93	22.3	613	651	581	388	437	418	15.76	10.9333	31.3067	21.9533	615	414.333
72881	72881	Zdhhc4	11.55	14.34	15.97	12.09	11.74	12.51	22.98	28.62	31.51	24.17	23.64	25.16	249	298	337	247	245	261	13.9533	12.1133	27.7033	24.3233	294.667	251
72657	72657	Selenoh	60.37	47.45	64.72	56.41	60.47	59.57	120.06	94.71	127.72	112.73	121.75	119.82	451	351	489	411	449	434	57.5133	58.8167	114.163	118.1	430.333	431.333
66411	66411	Tbcb	53.46	53.71	51.99	55.31	53.58	53.63	106.3	107.2	102.6	110.53	107.88	107.88	921	893	938	920	849	831	53.0533	54.1733	105.367	108.763	917.333	866.667
56404	56404	Trip4	8.53	10.5	8.44	8.01	8.02	8.52	16.96	20.95	16.66	16.02	16.14	17.14	775.11	856	766.99	612.9	698	694.98	9.15667	8.18333	18.19	16.4333	799.367	668.627
66468	66468	Ska1	1.9	1.62	2.08	3.31	3.17	3.36	3.79	3.23	4.1	6.61	6.39	6.76	81	69	89	135	132	139	1.86667	3.28	3.70667	6.58667	79.6667	135.333
109229	109229	Fam118b	11.38	11.33	11.89	10.59	9.71	10.56	22.63	22.61	23.47	21.16	19.55	21.25	315	312	315	268	255	249	11.5333	10.2867	22.9033	20.6533	314	257.333
231296	231296	Lrrc66	0.06	0.02	0.02	0	0	0	0.12	0.04	0.04	0	0	0	3	1	1	0	0	0	0.0333333	0	0.0666667	0	1.66667	0
621364	621364	Frg2f4	0	0	0	0	0	0.07	0	0	0	0	0	0.15	0	0	0	0	0	1	0	0.0233333	0	0.05	0	0.333333
170788	170788	Crb1	0.03	0	0	0	0.03	0	0.05	0	0	0	0.05	0	2	0	0	0	2	0	0.01	0.01	0.0166667	0.0166667	0.666667	0.666667
408068	408068	Zfp738	2.69	3.26	2.36	2.21	2.15	2.36	5.36	6.5	4.65	4.41	4.33	4.74	207.77	251.56	181.89	163.22	161.56	176.34	2.77	2.24	5.50333	4.49333	213.74	167.04
217708	217708	Lin52	3.63	4.57	3.83	2.78	3.36	3.35	7.22	9.12	7.55	5.55	6.76	6.74	124	156	131	91	112	111	4.01	3.16333	7.96333	6.35	137	104.667
233651	233651	Dchs1	3.33	5.74	3.6	5.69	5.19	5.16	6.63	11.46	7.11	11.38	10.44	10.37	632	1093	682	1040	958	950	4.22333	5.34667	8.4	10.73	802.333	982.667
28088	28088	Rtcb	96.53	98.23	95.54	99.16	96.26	100.03	191.97	196.06	188.53	198.17	193.82	201.2	3005	3056	2984	2966	2931	3024	96.7667	98.4833	192.187	197.73	3015	2973.67
338370	338370	Nalcn	0.03	0	0.04	0.02	0.02	0.02	0.06	0	0.09	0.03	0.05	0.05	4	0	3	1	3	3	0.0233333	0.02	0.05	0.0433333	2.33333	2.33333
30951	30951	Cbx8	4.22	4.58	5.5	2.31	3.36	2.26	8.4	9.15	10.85	4.62	6.77	4.55	109	114	134	55	81	51	4.76667	2.64333	9.46667	5.31333	119	62.3333
24084	24084	Tekt2	1.34	1.25	1.08	0.63	1.23	1.03	2.66	2.49	2.13	1.25	2.48	2.08	32	31	27	15	30	25	1.22333	0.963333	2.42667	1.93667	30	23.3333
635702	635702	Naaladl2	1.07	1.19	0.88	0.78	0.89	0.89	2.13	2.37	1.73	1.55	1.79	1.79	177	196	145	123	143	141	1.04667	0.853333	2.07667	1.71	172.667	135.667
654470	654470	Tctn1	3.24	4.17	2.77	2.7	2.97	2.6	6.44	8.33	5.46	5.4	5.98	5.23	224.21	288.99	191.94	179.48	200.55	174.58	3.39333	2.75667	6.74333	5.53667	235.047	184.87
66086	66086	Fopnl	31.09	26.56	31.88	27.46	27.74	26.92	61.84	53.02	62.9	54.88	55.85	54.15	650	557	671	553	569	546	29.8433	27.3733	59.2533	54.96	626	556
208643	208643	Eif4g1	217.54	189.92	220.25	216.09	212.31	214.46	432.62	379.08	434.62	431.83	427.48	431.36	20363	17816	20653	19433	19430	19516	209.237	214.287	415.44	430.223	19610.7	19459.7
66480	66480	Rpl15	337.36	319.28	339.92	360.23	362.77	342.3	670.9	637.27	670.78	719.88	730.43	688.51	9773	9230	9886	10037	10282	9638	332.187	355.1	659.65	712.94	9629.67	9985.67
77057	77057	Ston1	69.28	62.6	66.08	64.96	66.18	68.64	137.77	124.94	130.39	129.82	133.25	138.05	5146	4663	4840	4563	4695	4872	65.9867	66.5933	131.033	133.707	4883	4710
66816	66816	Thap2	2.53	3.23	2.81	1.41	1.34	1.37	5.03	6.44	5.54	2.82	2.7	2.76	217	277	241	116	112	114	2.85667	1.37333	5.67	2.76	245	114
71242	71242	Spata24	8.18	9.63	8.44	7.28	7.1	6.34	16.26	19.23	16.66	14.56	14.29	12.75	65	76	68	56	56	49	8.75	6.90667	17.3833	13.8667	69.6667	53.6667
668158	668158	Ccdc85c	1.36	1.01	1.25	1.46	1.27	1.28	2.7	2.01	2.46	2.92	2.55	2.57	100	78	92	104	91	94	1.20667	1.33667	2.39	2.68	90	96.3333
14786	14786	Grb7	0	0	0.03	0	0	0	0	0	0.06	0	0	0	0	0	1	0	0	0	0.01	0	0.02	0	0.333333	0
19360	19360	Rad50	12.61	12.48	12.55	12.68	13.05	13.3	25.09	24.9	24.76	25.34	26.29	26.75	1122	1111	1117	1081	1132	1148	12.5467	13.01	24.9167	26.1267	1116.67	1120.33
217721	217721	Flvcr2	1.89	2	1.65	2.03	1.83	1.98	3.76	4	3.25	4.06	3.69	3.99	109	110	95	111	103	108	1.84667	1.94667	3.67	3.91333	104.667	107.333
54141	54141	Spag5	9.84	9.14	10.83	14.81	13.66	15.75	19.56	18.23	21.37	29.59	27.51	31.68	622	592	686	912	863	990	9.93667	14.74	19.72	29.5933	633.333	921.667
218503	218503	Fcho2	9.44	9.64	9.75	7.54	7.93	8.25	18.78	19.23	19.24	15.06	15.98	16.59	831	852	855	638	681	707	9.61	7.90667	19.0833	15.8767	846	675.333
11687	11687	Alox15	0.1	0.08	0.09	0.08	0.06	0.08	0.19	0.17	0.19	0.16	0.11	0.17	30	26	29	23	17	25	0.09	0.0733333	0.183333	0.146667	28.3333	21.6667
74463	74463	Exoc3l2	0.01	0	0.03	0.02	0.02	0.02	0.03	0	0.06	0.03	0.03	0.03	1	0	2	1	1	1	0.0133333	0.02	0.03	0.03	1	1
16400	16400	Itga3	5.66	3.55	6.55	2.23	2.35	2.47	11.26	7.09	12.92	4.46	4.73	4.96	475	297	549	180	192	200	5.25333	2.35	10.4233	4.71667	440.333	190.667
320664	320664	Cass4	0.64	1.09	0.39	1.05	0.99	1.14	1.28	2.18	0.78	2.11	1.99	2.29	40	68	25	62	60	68	0.706667	1.06	1.41333	2.13	44.3333	63.3333
76448	76448	Ppp1r18	61.09	55.35	59.53	72.18	70.73	71.88	121.49	110.48	117.48	144.25	142.42	144.59	2919	2638	2850	3356	3285	3356	58.6567	71.5967	116.483	143.753	2802.33	3332.33
26447	26447	Poli	1.32	1.64	1.2	1.34	1.18	1.51	2.63	3.28	2.36	2.68	2.37	3.04	63	84	60	59	53	69	1.38667	1.34333	2.75667	2.69667	69	60.3333
109212	109212	Pimreg	26.14	18.26	25.97	32.75	34.37	32.91	51.97	36.44	51.25	65.45	69.19	66.2	545	375	537	652	698	657	23.4567	33.3433	46.5533	66.9467	485.667	669
11542	11542	Adora3	0.1	0.13	0	0	0	0	0.2	0.26	0	0	0	0	3.76	5	0	0	0	0	0.0766667	0	0.153333	0	2.92	0
213449	213449	Tent5d	0.02	0.04	0.02	0	0	0	0.04	0.08	0.04	0	0	0	1	2	1	0	0	0	0.0266667	0	0.0533333	0	1.33333	0
56708	56708	Clcf1	14.08	10.27	14.58	15.68	17.04	14.39	28	20.5	28.77	31.33	34.31	28.95	408	297	424	436	483	405	12.9767	15.7033	25.7567	31.53	376.333	441.333
74414	74414	Polr3c	26.33	25.8	23.79	29.88	27.95	30.59	52.35	51.49	46.95	59.71	56.28	61.53	727	733	655	790	811	837	25.3067	29.4733	50.2633	59.1733	705	812.667
93707	93707	Pcdhgc4	0.71	0.87	0.82	0.47	0.69	0.65	1.42	1.74	1.63	0.95	1.38	1.32	61.73	75.38	71.46	39.31	57.98	55	0.8	0.603333	1.59667	1.21667	69.5233	50.7633
74166	74166	Tmem38a	9.8	8.49	9.01	5.45	5.1	4.61	19.5	16.95	17.79	10.89	10.27	9.28	382	338	358	206	195	175	9.1	5.05333	18.08	10.1467	359.333	192
243653	243653	Clec1a	0.29	0.39	0.38	0.13	0.08	0.06	0.59	0.78	0.76	0.27	0.15	0.11	16	21	21	7	4	3	0.353333	0.09	0.71	0.176667	19.3333	4.66667
68585	68585	Rtn4	324.2	277.19	321.76	331.52	333.17	328.58	644.73	553.26	634.94	662.51	670.84	660.9	21851	18704	21681	21479	21944	21602	307.717	331.09	610.977	664.75	20745.3	21675
20184	20184	Uimc1	15.06	15.49	14.36	18.06	16.83	17.11	29.94	30.92	28.34	36.1	33.89	34.42	627	620	578	688	677	685	14.97	17.3333	29.7333	34.8033	608.333	683.333
623131	623131	Prr19	0.05	0.11	0	0	0.05	0	0.11	0.21	0	0	0.11	0	1	2	0	0	1	0	0.0533333	0.0166667	0.106667	0.0366667	1	0.333333
329002	329002	Zfp236	5.44	5.14	5.25	5.77	5.18	5.2	10.82	10.26	10.37	11.53	10.44	10.46	954	866	916	918	896	889	5.27667	5.38333	10.4833	10.81	912	901
19225	19225	Ptgs2	88.05	48.3	106.53	170.16	176.83	173.82	175.09	96.41	210.22	340.05	356.05	349.61	6720	3690	8140	12450	13161	12876	80.96	173.603	160.573	348.57	6183.33	12829
330460	330460	Tmem150b	0.19	0.11	0.05	0.02	0.05	0.09	0.38	0.22	0.09	0.05	0.09	0.19	4.08	5.12	2.1	1.05	2.05	4.24	0.116667	0.0533333	0.23	0.11	3.76667	2.44667
13929	13929	Amz2	9.35	10.75	8.37	9.49	9.36	9.66	18.59	21.46	16.51	18.96	18.85	19.42	452	512	403	433	431	447	9.49	9.50333	18.8533	19.0767	455.667	437
338363	338363	Tmem241	2.21	2.34	2.21	2.78	2.1	1.93	4.39	4.68	4.36	5.56	4.23	3.88	104	124	112.95	119.99	104	90.14	2.25333	2.27	4.47667	4.55667	113.65	104.71
140492	140492	Kcnn2	0.09	0.09	0.14	0.05	0.08	0.13	0.17	0.19	0.28	0.11	0.16	0.26	5	4	5	3	3	5	0.106667	0.0866667	0.213333	0.176667	4.66667	3.66667
80986	80986	Ckap2	21.54	18.33	25.16	19.3	20.11	19.34	42.84	36.58	49.65	38.56	40.48	38.91	919	781	1078	793	840	803	21.6767	19.5833	43.0233	39.3167	926	812
13641	13641	Efnb1	8.43	8.21	7.54	10.4	10.66	10.4	16.76	16.38	14.88	20.78	21.46	20.92	474	462	425	561	585	568	8.06	10.4867	16.0067	21.0533	453.667	571.333
449000	449000	Zfp960	2.47	1.85	2.28	1.78	1.5	1.94	4.9	3.7	4.49	3.56	3.01	3.91	108.24	81.38	100.14	74.96	64.14	82.78	2.2	1.74	4.36333	3.49333	96.5867	73.96
258469	258469	Olfr90	0	0	0.07	0	0.07	0	0	0	0.14	0	0.14	0	0	0	1	0	1	0	0.0233333	0.0233333	0.0466667	0.0466667	0.333333	0.333333
17463	17463	Psmd7	145.17	132.72	140.02	152.05	154.82	148.56	288.7	264.91	276.3	303.85	311.74	298.81	3517	3211	3407	3543	3674	3496	139.303	151.81	276.637	304.8	3378.33	3571
76491	76491	Abhd14b	10.14	9.63	10.39	8.17	7.52	7.32	20.17	19.23	20.5	16.32	15.14	14.72	228	216	235	177	165	162	10.0533	7.67	19.9667	15.3933	226.333	168
68205	68205	Urm1	18.99	17.53	20.1	17.49	17.27	17.87	37.77	35	39.67	34.94	34.77	35.94	648	598	688	573	576	592	18.8733	17.5433	37.48	35.2167	644.667	580.333
228410	228410	Cstf3	16.41	15.13	14.62	19.01	19.02	18.06	32.63	30.2	28.85	37.98	38.3	36.33	661	619	607	710	709	678	15.3867	18.6967	30.56	37.5367	629	699
14680	14680	Gnal	0.22	0.26	0.34	0.21	0.15	0.12	0.43	0.52	0.67	0.42	0.31	0.24	21.15	25.36	32.1	18.9	14.56	11.09	0.273333	0.16	0.54	0.323333	26.2033	14.85
195018	195018	Zzef1	15.3	13.33	16.87	19.67	19.7	19.74	30.43	26.6	33.3	39.31	39.67	39.7	2693	2445	2909	3278	3432	3360	15.1667	19.7033	30.11	39.56	2682.33	3356.67
317677	317677	C1s2	0	0.04	0.02	0.1	0.1	0.05	0	0.08	0.05	0.19	0.19	0.1	0	1.73	1.01	4.01	4.04	2.02	0.02	0.0833333	0.0433333	0.16	0.913333	3.35667
71326	71326	Treml1	0.11	0	0.06	0	0	0.06	0.23	0	0.11	0	0	0.12	2	0	1	0	0	1	0.0566667	0.02	0.113333	0.04	1	0.333333
56390	56390	Znrd2	27.13	22.86	21.1	32.77	31.05	28.65	53.96	45.64	41.63	65.49	62.51	57.62	213	178	168	250	242	219	23.6967	30.8233	47.0767	61.8733	186.333	237
14107	14107	Fat1	87.59	81.5	87.94	74.22	74.96	78.26	174.18	162.66	173.53	148.33	150.94	157.41	23577	21977	23638	19195	19691	20505	85.6767	75.8133	170.123	152.227	23064	19797
30791	30791	Slc39a1	100.99	107.46	98.9	71.86	77.79	75.85	200.83	214.48	195.16	143.6	156.64	152.57	3817	4061	3748	2607	2873	2783	102.45	75.1667	203.49	150.937	3875.33	2754.33
52615	52615	Suz12	24.44	21.39	23.87	25.12	24.55	26.09	48.61	42.69	47.1	50.21	49.43	52.47	1824	1597	1783	1798	1785	1890	23.2333	25.2533	46.1333	50.7033	1734.67	1824.33
21858	21858	Timp2	471.91	467.32	474.65	240.56	237.95	237.58	938.45	932.75	936.66	480.73	479.11	477.87	28814	28553	29026	14086	14175	14081	471.293	238.697	935.953	479.237	28797.7	14114
11652	11652	Akt2	38.78	37.61	38.64	38.69	41.48	39.5	77.12	75.06	76.25	77.33	83.52	79.44	2109	2030	2114	2036	2164	2094	38.3433	39.89	76.1433	80.0967	2084.33	2098
245886	245886	Ankrd27	21.91	23.47	22.21	21.01	18.52	20.01	43.56	46.84	43.83	41.99	37.3	40.25	1382	1439	1392	1294	1193	1241	22.53	19.8467	44.7433	39.8467	1404.33	1242.67
66968	66968	Plin5	0.04	0	0.08	0.04	0	0	0.08	0	0.16	0.09	0	0	1	0	2	1	0	0	0.04	0.0133333	0.08	0.03	1	0.333333
14997	14997	H2-M9	0.62	0.57	0.36	0.29	0.59	0.21	1.23	1.13	0.71	0.58	1.18	0.42	9	8	5	4	8	3	0.516667	0.363333	1.02333	0.726667	7.33333	5
214627	214627	Tent4b	13.98	13.6	13.76	12.13	12.54	13.61	27.8	27.14	27.15	24.24	25.24	27.37	1043	1041	1036	873	922	997	13.78	12.76	27.3633	25.6167	1040	930.667
269682	269682	Golga3	13.6	15.26	13.16	10.82	11.19	11.7	27.05	30.45	25.96	21.62	22.53	23.54	1931	2166	1865	1471	1545	1609	14.0067	11.2367	27.82	22.5633	1987.33	1541.67
73720	73720	Cst6	0.31	0.19	0.24	0.65	0.72	0.69	0.62	0.39	0.47	1.31	1.45	1.39	21	13	16	42	47	45	0.246667	0.686667	0.493333	1.38333	16.6667	44.6667
16427	16427	Itih4	0	0.04	0.04	0.02	0.04	0.04	0	0.08	0.08	0.04	0.08	0.08	0	2	2	1	2	2	0.0266667	0.0333333	0.0533333	0.0666667	1.33333	1.66667
72938	72938	Hspb11	19.39	21.14	20.87	18.2	21.05	16.91	38.56	42.2	41.18	36.37	42.38	34.02	137	139.63	143.99	121	139.33	111	20.4667	18.72	40.6467	37.59	140.207	123.777
140571	140571	Plxnb3	0.02	0.12	0.1	0.04	0.09	0.08	0.04	0.24	0.19	0.07	0.19	0.16	2	12	10	3	9	8	0.08	0.07	0.156667	0.14	8	6.66667
27528	27528	Nrep	12.91	24.17	17.04	13.92	13.92	15.09	25.67	48.24	33.62	27.82	28.03	30.35	440	811	576	451	462	494	18.04	14.31	35.8433	28.7333	609	469
70335	70335	Reep6	1.52	0.76	1.06	1.3	1.5	1.39	3.02	1.51	2.09	2.61	3.02	2.8	46	23	33	38	41	41	1.11333	1.39667	2.20667	2.81	34	40
211978	211978	Zfyve26	5.28	6.08	5.28	4.1	4.24	4.44	10.5	12.13	10.42	8.19	8.54	8.94	844	987	876	638	668	685	5.54667	4.26	11.0167	8.55667	902.333	663.667
66784	66784	Fam187a	0.04	0	0	0	0	0	0.08	0	0	0	0	0	1	0	0	0	0	0	0.0133333	0	0.0266667	0	0.333333	0
252903	252903	Ap1s3	0.76	0.56	0.66	0.55	0.49	0.62	1.51	1.11	1.31	1.1	0.99	1.24	36.05	26.38	31.61	25.16	22.86	28.47	0.66	0.553333	1.31	1.11	31.3467	25.4967
67556	67556	Pigm	5.54	5.57	5.46	6.96	6.7	6.75	11.01	11.12	10.77	13.92	13.49	13.58	736	742	726	887	868	871	5.52333	6.80333	10.9667	13.6633	734.667	875.333
22278	22278	Usf1	14	15.45	15.07	14.77	14.37	14.25	27.85	30.84	29.75	29.52	28.93	28.67	387	425	418	391	386	383	14.84	14.4633	29.48	29.04	410	386.667
80903	80903	Fgf16	0.1	0.16	0.14	0	0.02	0.02	0.2	0.32	0.27	0	0.04	0.04	5	8	7	0	1	1	0.133333	0.0133333	0.263333	0.0266667	6.66667	0.666667
70544	70544	Tmem242	44.56	45.23	45.11	39.97	41.73	42.2	88.62	90.28	89.02	79.87	84.03	84.89	569	575	581	493	525	524	44.9667	41.3	89.3067	82.93	575	514
258441	258441	Olfr1310	0	0.08	0	0	0	0	0	0.16	0	0	0	0	0	1	0	0	0	0	0.0266667	0	0.0533333	0	0.333333	0
70358	70358	Steap1	32.56	30.84	27.39	55.28	55.66	56.49	64.74	61.56	54.06	110.47	112.08	113.63	561	530	475	918	942	946	30.2633	55.81	60.12	112.06	522	935.333
12825	12825	Col3a1	110.42	292.2	156.38	175.87	180.19	180.97	219.58	583.22	308.59	351.46	362.81	364	10648	28211	15093	16253	16937	16937	186.333	179.01	370.463	359.423	17984	16709
11769	11769	Ap1s1	137.24	118.62	135.14	134.71	130.27	134.74	272.92	236.75	266.69	269.21	262.3	271.01	2648	2283	2628	2502	2461	2530	130.333	133.24	258.787	267.507	2519.67	2497.67
216177	216177	AU041133	1.3	1.37	0.95	1.36	1.26	1.66	2.59	2.73	1.88	2.72	2.53	3.34	56	59	38	52	53	57	1.20667	1.42667	2.4	2.86333	51	54
58240	58240	Hs1bp3	17.86	18.01	17.57	14.34	13.49	12.8	35.52	35.95	34.67	28.65	27.15	25.74	875	883	863	674	645	609	17.8133	13.5433	35.38	27.18	873.667	642.667
67553	67553	Gstcd	6.19	6.17	7.18	10.21	10.59	11.54	12.32	12.32	14.18	20.4	21.33	23.21	365	364	424	577	609	660	6.51333	10.78	12.94	21.6467	384.333	615.333
108013	108013	Celf4	2.51	1.94	2.59	2.66	2.37	2.6	4.99	3.88	5.11	5.32	4.77	5.24	178	136	181	179	157	175	2.34667	2.54333	4.66	5.11	165	170.333
72097	72097	2010300C02Rik	0.05	0.09	0.01	0.03	0.1	0.04	0.1	0.19	0.03	0.06	0.19	0.08	4	7	1	2	7	3	0.05	0.0566667	0.106667	0.11	4	4
217119	217119	Xylt2	9.61	10.32	11.61	7.31	7.72	7.17	19.11	20.59	22.91	14.62	15.55	14.43	552	593	668	403	433	400	10.5133	7.4	20.87	14.8667	604.333	412
66350	66350	Pla2g12a	13.91	15.5	13.02	14.56	14.52	13.61	27.66	30.94	25.7	29.09	29.24	27.37	328	365	309	330	336	312	14.1433	14.23	28.1	28.5667	334	326
59014	59014	Rrs1	41.81	37.38	42.66	60.04	60.15	60.35	83.14	74.61	84.18	119.98	121.11	121.39	1354	1210	1386	1868	1905	1898	40.6167	60.18	80.6433	120.827	1316.67	1890.33
15461	15461	Hras	67.19	60.04	74.24	61.52	56.61	59.92	133.63	119.83	146.5	122.94	113.99	120.51	1141	1017	1266	990	938	986	67.1567	59.35	133.32	119.147	1141.33	971.333
20532	20532	Slc3a1	0.15	0.06	0.06	0.06	0.03	0.06	0.3	0.12	0.12	0.12	0.06	0.12	5.59	2.26	2.17	2.22	1.12	2.21	0.09	0.05	0.18	0.1	3.34	1.85
56535	56535	Pex3	8.27	10.95	9.4	10.82	10.24	10.53	16.45	21.85	18.55	21.63	20.61	21.19	262.57	318.89	279.93	306.86	314.09	320.53	9.54	10.53	18.95	21.1433	287.13	313.827
17702	17702	Msx2	3.28	2.09	3.62	1.84	1.34	1.23	6.52	4.17	7.14	3.68	2.69	2.46	113	72	125	61	45	41	2.99667	1.47	5.94333	2.94333	103.333	49
209294	209294	Csta1	0	0	0	0	0.02	0	0	0	0	0	0.05	0	0	0	0	0	1	0	0	0.00666667	0	0.0166667	0	0.333333
14065	14065	F2rl3	0.03	0	0.03	0.07	0.07	0.07	0.06	0	0.06	0.13	0.13	0.13	1	0	1	2	2	2	0.02	0.07	0.04	0.13	0.666667	2
13195	13195	Ddc	0.32	0.58	0.51	1.08	1.08	0.66	0.64	1.15	1.01	2.16	2.18	1.33	10	18	16	32	33	20	0.47	0.94	0.933333	1.89	14.6667	28.3333
319165	319165	H2ac7	1.63	1.96	0.95	0.33	0.37	0.89	3.25	3.92	1.88	0.66	0.74	1.8	7.89	9.35	4.7	1.57	1.79	4.21	1.51333	0.53	3.01667	1.06667	7.31333	2.52333
209462	209462	Hace1	4.38	5.04	4.2	5.75	5.08	5.72	8.7	10.06	8.29	11.5	10.23	11.51	271	317	266	348	312	349	4.54	5.51667	9.01667	11.08	284.667	336.333
108168771	108168771	LOC108168771	0.07	0	0	0	0	0	0.14	0	0	0	0	0	1	0	0	0	0	0	0.0233333	0	0.0466667	0	0.333333	0
117229	117229	Stk33	0.15	0.13	0.17	0.12	0.15	0.14	0.3	0.27	0.34	0.23	0.31	0.28	4	5	5	4	4	4	0.15	0.136667	0.303333	0.273333	4.66667	4
320655	320655	Pgap3	1.53	1.54	1.51	2.06	2.09	1.92	3.04	3.07	2.98	4.11	4.2	3.85	60	61	60	78	80	73	1.52667	2.02333	3.03	4.05333	60.3333	77
115489542	115489542	LOC115489542	0.64	0.53	0.56	0.43	0.47	0.11	1.28	1.06	1.11	0.85	0.94	0.22	7.11	5.84	6.27	4.58	5.11	1.16	0.576667	0.336667	1.15	0.67	6.40667	3.61667
17392	17392	Mmp3	110.37	208.67	169.94	100.98	101.34	101.42	219.49	416.49	335.34	201.8	204.06	204	3078	5814	4757	2707	2766	2747	162.993	101.247	323.773	203.287	4549.67	2740
66712	66712	Spesp1	0	0.02	0	0	0	0	0	0.04	0	0	0	0	0	1	0	0	0	0	0.00666667	0	0.0133333	0	0.333333	0
319888	319888	Oacyl	0.44	0.3	0.47	0.16	0.12	0.23	0.88	0.59	0.92	0.33	0.25	0.47	27	17	28	9	7	13	0.403333	0.17	0.796667	0.35	24	9.66667
73086	73086	Rps6ka5	0.9	1.06	0.95	1.78	1.87	1.86	1.8	2.11	1.87	3.56	3.76	3.75	80	87	81	157	162	168	0.97	1.83667	1.92667	3.69	82.6667	162.333
236539	236539	Phgdh	354.29	294.17	311.51	357.3	365.36	368.16	704.55	587.14	614.71	714.02	735.65	740.51	10332	8572	9117	10014	10425	10427	319.99	363.607	635.467	730.06	9340.33	10288.7
102634941	102634941	Gm29376	0	0	0.05	0	0	0	0	0	0.1	0	0	0	0	0	1	0	0	0	0.0166667	0	0.0333333	0	0.333333	0
66245	66245	Hspbp1	16.88	13.66	15.93	20.18	18.28	21.19	33.57	27.27	31.44	40.33	36.8	42.62	383	312	367	441	409	468	15.49	19.8833	30.76	39.9167	354	439.333
79459	79459	Aldoart2	0	0	0	0	0.04	0	0	0	0	0	0.08	0	0	0	0	0	1	0	0	0.0133333	0	0.0266667	0	0.333333
12368	12368	Casp6	8.98	9.9	9.75	11.17	10.5	12.01	17.85	19.77	19.24	22.33	21.15	24.15	197	217	215	236	226	256	9.54333	11.2267	18.9533	22.5433	209.667	239.333
19271	19271	Ptprj	3.93	4.87	4.98	1.99	2.06	2.08	7.82	9.72	9.83	3.98	4.14	4.19	511	639	656	252	264	269	4.59333	2.04333	9.12333	4.10333	602	261.667
330149	330149	Hfm1	0	0	0	0.04	0.01	0.05	0	0	0	0.08	0.03	0.1	0	0	0	3	1	1	0	0.0333333	0	0.07	0	1.66667
64659	64659	Mrps14	17.12	16.28	17.51	17.66	17.1	17.26	34.04	32.48	34.55	35.29	34.44	34.71	545	518	559	540	532	533	16.97	17.34	33.69	34.8133	540.667	535
442801	442801	Arhgef15	0.04	0.06	0.06	0.09	0.12	0.02	0.08	0.11	0.11	0.18	0.23	0.05	2	4	4	5	8	1	0.0533333	0.0766667	0.1	0.153333	3.33333	4.66667
28018	28018	Ubfd1	16.75	16.41	18.13	15.44	14.81	16.37	33.31	32.75	35.78	30.85	29.82	32.93	1224	1285	1231	935	1032	979	17.0967	15.54	33.9467	31.2	1246.67	982
67054	67054	Paics	93.1	87.81	100.82	115.61	117.72	120.35	185.15	175.26	198.95	231.03	237.04	242.07	3227.55	3043.73	3499.62	3860.5	3989.41	4035.99	93.91	117.893	186.453	236.713	3256.97	3961.97
11567	11567	Avil	0.18	0.46	0.28	0.29	0.23	0.23	0.36	0.91	0.55	0.58	0.47	0.46	9	23	14	14	12	11	0.306667	0.25	0.606667	0.503333	15.3333	12.3333
14048	14048	Eya1	2.46	2.12	2.54	1.28	1.35	1.19	4.89	4.22	5.02	2.57	2.72	2.39	181	156	188	93	97	85	2.37333	1.27333	4.71	2.56	175	91.6667
216001	216001	Micu1	30.89	32.4	30.18	36.72	36.08	34.28	61.43	64.66	59.55	73.38	72.64	68.95	1175	1232	1151	1341	1341	1266	31.1567	35.6933	61.88	71.6567	1186	1316
70103	70103	Znhit1	26.71	25.16	27.32	28.24	32.22	28.25	53.11	50.23	53.9	56.43	64.87	56.82	343.19	314.8	353.25	333.37	389.51	345.2	26.3967	29.57	52.4133	59.3733	337.08	356.027
233987	233987	Zfp958	2.55	2.69	2.65	2.03	2.03	2.02	5.07	5.36	5.23	4.05	4.09	4.06	206	217	214	157	160	158	2.63	2.02667	5.22	4.06667	212.333	158.333
78938	78938	Fbxo34	9.4	10.35	9.93	9.32	9.14	8.54	18.7	20.67	19.59	18.62	18.41	17.18	478	523	507	456	458	428	9.89333	9	19.6533	18.07	502.667	447.333
56771	56771	Med20	15.38	17.32	15.42	13.65	11.83	13.3	30.59	34.57	30.43	27.28	23.81	26.74	620	722.92	648	575.53	515	575	16.04	12.9267	31.8633	25.9433	663.64	555.177
78394	78394	Ddx52	15.45	14.72	14.32	17.55	17.65	17.95	30.72	29.39	28.27	35.07	35.55	36.1	815	777	757	888	909	919	14.83	17.7167	29.46	35.5733	783	905.333
216705	216705	Clint1	62.46	65.23	60.47	56.77	58.43	58.75	124.22	130.2	119.33	113.45	117.64	118.17	3553	3712	3441	3096	3241	3245	62.72	57.9833	124.583	116.42	3568.67	3194
66991	66991	Khdc3	0	0.01	0	0	0	0	0	0.03	0	0	0	0	0	1	0	0	0	0	0.00333333	0	0.01	0	0.333333	0
16559	16559	Kif17	0.06	0.07	0.02	0.06	0.06	0	0.12	0.14	0.04	0.12	0.12	0	3	4	1	3	3	0	0.05	0.04	0.1	0.08	2.66667	2
22213	22213	Ube2g2	60.83	58.81	56.92	47.29	47.97	46.26	120.97	117.39	112.33	94.51	96.58	93.05	1897	1833	1781	1417	1463	1401	58.8533	47.1733	116.897	94.7133	1837	1427
208366	208366	Rpp40	4	5.62	3.29	7.95	8.18	7.28	7.95	11.22	6.49	15.89	16.47	14.65	83	104	78	153	165	149	4.30333	7.80333	8.55333	15.67	88.3333	155.667
545260	545260	Arsi	1.45	1.74	1.29	1.35	1.41	1.34	2.89	3.47	2.55	2.69	2.83	2.69	68	84	65	60	64	63	1.49333	1.36667	2.97	2.73667	72.3333	62.3333
108167440	108167440	LOC108167440	4.19	5.04	4.46	6.78	6.99	7.13	8.34	10.06	8.79	13.55	14.07	14.35	853	1048.92	912	1323	1402	1438	4.56333	6.96667	9.06333	13.99	937.973	1387.67
66676	66676	Tmed7	72.12	71.69	71.9	58.03	62.22	62.33	143.41	143.1	141.87	115.97	125.28	125.37	4180	4158	4174	3226	3519	3507	71.9033	60.86	142.793	122.207	4170.67	3417.33
100233208	100233208	Gm10778	0.38	0.66	0.6	0.27	0.3	0.3	0.76	1.31	1.19	0.55	0.61	0.6	31.21	53.37	49.08	21.28	23.96	23.46	0.546667	0.29	1.08667	0.586667	44.5533	22.9
209018	209018	Vps8	9.84	11.26	9.24	10.64	10.4	11.04	19.56	22.47	18.23	21.25	20.95	22.2	852	976	801	883	878	928	10.1133	10.6933	20.0867	21.4667	876.333	896.333
22354	22354	Vipr1	0.05	0.08	0.08	0.05	0.06	0.05	0.09	0.17	0.16	0.1	0.12	0.1	4	7	7	4	5	4	0.07	0.0533333	0.14	0.106667	6	4.33333
70417	70417	Megf10	3.55	2.76	3.34	6.07	6.02	6.04	7.07	5.51	6.59	12.13	12.12	12.14	469	365	441	767	774	773	3.21667	6.04333	6.39	12.13	425	771.333
75480	75480	1700003F12Rik	1.06	1.19	1.51	0.24	0.5	0.37	2.11	2.37	2.99	0.49	1.01	0.75	9	10	13	2	4	3	1.25333	0.37	2.49	0.75	10.6667	3
66707	66707	Nkapl	0.28	0.46	0.28	0.14	0.09	0.24	0.55	0.93	0.55	0.29	0.19	0.48	6	10	6	3	2	5	0.34	0.156667	0.676667	0.32	7.33333	3.33333
407831	407831	Tmem204	0.44	0.58	0.22	0.49	0.48	0.37	0.87	1.16	0.43	0.98	0.97	0.75	12	16	6	13	13	10	0.413333	0.446667	0.82	0.9	11.3333	12
100169864	100169864	Gm44504	10.99	11.38	11.3	11.67	9.04	10.71	21.85	22.71	22.31	23.33	18.21	21.55	176.33	182	182.64	180.64	142.62	167.1	11.2233	10.4733	22.29	21.03	180.323	163.453
319899	319899	Dock6	3.7	4.49	3.76	4.41	4.83	4.2	7.36	8.96	7.41	8.8	9.73	8.44	407	505	411	470	524	462	3.98333	4.48	7.91	8.99	441	485.333
102637366	102637366	Gm10037	0.23	0.13	0.36	0	0	0.2	0.46	0.27	0.7	0	0	0.41	8	6	6	0	0	1	0.24	0.0666667	0.476667	0.136667	6.66667	0.333333
19891	19891	Rpa2	10.42	9.19	13.13	15.83	15.62	16.67	20.72	18.35	25.91	31.63	31.45	33.54	287	253	363	419	421	446	10.9133	16.04	21.66	32.2067	301	428.667
73647	73647	Capn9	0.03	0.03	0	0	0	0	0.05	0.06	0	0	0	0	1	1	0	0	0	0	0.02	0	0.0366667	0	0.666667	0
72139	72139	2610044O15Rik8	5.18	5.07	5.59	3.53	3.5	4.01	10.29	10.12	11.04	7.05	7.05	8.08	142.01	139.01	154.03	93	94	106.97	5.28	3.68	10.4833	7.39333	145.017	97.99
18813	18813	Pa2g4	119.45	104.17	117.22	136.4	138.18	139.89	237.54	207.91	231.31	272.58	278.23	281.38	4704	4102	4628	5157	5317	5349	113.613	138.157	225.587	277.397	4478	5274.33
72958	72958	Zfp493	0.82	0.75	0.6	0.3	0.47	0.4	1.64	1.49	1.19	0.61	0.94	0.8	45	41	33	16	25	21	0.723333	0.39	1.44	0.783333	39.6667	20.6667
56089	56089	Ramp3	16.05	9.93	21.82	35.96	35.72	33.96	31.91	19.82	43.07	71.87	71.91	68.31	282	174	382	604	614	578	15.9333	35.2133	31.6	70.6967	279.333	598.667
108147	108147	Atic	75.25	67.41	78.21	94.82	94.69	94.59	149.65	134.56	154.34	189.49	190.66	190.25	3209	2875	3343	3881	3944	3916	73.6233	94.7	146.183	190.133	3142.33	3913.67
75563	75563	Dnali1	0	0	0	0.06	0.12	0.06	0	0	0	0.13	0.25	0.13	0	0	0	2	4	2	0	0.08	0	0.17	0	2.66667
76793	76793	Snip1	11.78	12.06	11.43	11.95	12.5	11.62	23.43	24.08	22.55	23.89	25.17	23.38	446	457	434	434	462	427	11.7567	12.0233	23.3533	24.1467	445.667	441
114642	114642	Brdt	0.25	0.34	0.24	0.24	0.2	0.43	0.5	0.69	0.48	0.49	0.4	0.86	21	28	20	19	16	34	0.276667	0.29	0.556667	0.583333	23	23
68203	68203	Diras2	0.19	0.34	0.15	0.24	0.36	0.28	0.38	0.67	0.29	0.49	0.72	0.56	14	25	11	17	26	20	0.226667	0.293333	0.446667	0.59	16.6667	21
15926	15926	Idh1	47.28	53.42	47.81	54.44	52.7	52.33	94.03	106.62	94.34	108.79	106.11	105.25	1718	1940	1742	1899	1871	1846	49.5033	53.1567	98.33	106.717	1800	1872
242409	242409	Tmem8b	1.17	1.19	0.93	1.01	0.99	1.03	2.32	2.37	1.83	2.01	2	2.08	99	98	75	81	77	83	1.09667	1.01	2.17333	2.03	90.6667	80.3333
12317	12317	Calr	749.36	757.89	739.67	535.85	528.34	538.27	1490.2	1512.72	1459.63	1070.85	1063.83	1082.68	22836	23081	22618	15691	15750	15930	748.973	534.153	1487.52	1072.45	22845	15790.3
99412	99412	Golga2	29.66	31.65	30.32	26.42	26.85	25.82	58.99	63.18	59.83	52.79	54.07	51.93	2121	2275	2171	1819	1893	1797	30.5433	26.3633	60.6667	52.93	2189	1836.33
229474	229474	Fhdc1	7.33	5.42	7.37	4.9	4.7	5.37	14.58	10.82	14.54	9.8	9.47	10.79	759	563	763	486	475	540	6.70667	4.99	13.3133	10.02	695	500.333
68953	68953	Chmp2a	61.46	70.38	70	64.83	63.75	65.42	122.22	140.47	138.13	129.55	128.35	131.59	740	845	853	757	754	769	67.28	64.6667	133.607	129.83	812.667	760
338371	338371	Endov	3.04	3.74	2.95	3.68	3.81	3.75	6.04	7.46	5.81	7.36	7.68	7.53	237	310.02	254	276	266	282	3.24333	3.74667	6.43667	7.52333	267.007	274.667
11492	11492	Adam19	39.43	34.54	42.83	51.95	52.85	54.3	78.4	68.94	84.52	103.82	106.41	109.22	4391	3844	4781	5544	5734	5869	38.9333	53.0333	77.2867	106.483	4338.67	5715.67
56447	56447	Copz1	61.52	65.98	66.74	61.48	63.35	61.72	122.34	131.69	131.7	122.87	127.56	124.15	1599	1714	1742	1535	1613	1557	64.7467	62.1833	128.577	124.86	1685	1568.33
69225	69225	Naxd	23.43	27.74	23.14	22.08	22.81	21.72	46.59	55.36	45.67	44.12	45.92	43.69	448	534	448	408	427	405	24.77	22.2033	49.2067	44.5767	476.667	413.333
67025	67025	Rpl11	447.33	437.14	469.18	480.5	482.23	461.26	889.59	872.51	925.87	960.24	970.98	927.78	6325	6125	6731	6594	6697	6359	451.217	474.663	895.99	953	6393.67	6550
18993	18993	Pou3f3	0.45	0.49	0.78	0.69	0.61	0.56	0.89	0.97	1.53	1.37	1.22	1.12	34	37	59	50	45	41	0.573333	0.62	1.13	1.23667	43.3333	45.3333
22173	22173	Tyr	0.04	0.07	0.03	0.01	0.02	0.03	0.08	0.13	0.07	0.02	0.04	0.06	3.96	7	3.39	1	2.22	3	0.0466667	0.02	0.0933333	0.04	4.78333	2.07333
225898	225898	Eml3	13.59	13.03	12.54	13.56	13.46	12.73	27.02	26.01	24.75	27.1	27.11	25.61	722	695	662	693	702	658	13.0533	13.25	25.9267	26.6067	693	684.333
67967	67967	Pold3	7.06	6.17	7.3	9.42	9.03	9.03	14.05	12.31	14.41	18.83	18.18	18.17	367	316	373	464	450	447	6.84333	9.16	13.59	18.3933	352	453.667
80287	80287	Apobec3	3.28	3.94	3.05	2.37	2.34	2.35	6.53	7.85	6.03	4.73	4.71	4.73	136	157	128	89	91	94	3.42333	2.35333	6.80333	4.72333	140.333	91.3333
235439	235439	Herc1	8.05	8.72	8.42	8.28	8.42	8.22	16.02	17.41	16.61	16.55	16.96	16.54	2076.94	2256.87	2156.92	2059.95	2097.97	2100.84	8.39667	8.30667	16.68	16.6833	2163.58	2086.25
18826	18826	Lcp1	19	29.06	31.79	0.58	1.01	0.86	37.78	58.01	62.73	1.16	2.04	1.72	1159	1782	1956	33	60	49	26.6167	0.816667	52.84	1.64	1632.33	47.3333
12839	12839	Col9a1	0.1	0.08	0.16	0.02	0.02	0.02	0.19	0.15	0.31	0.04	0.04	0.04	5	4	8	1	1	1	0.113333	0.02	0.216667	0.04	5.66667	1
105244804	105244804	Gm40349	0	0.03	0	0	0	0	0	0.06	0	0	0	0	0	1	0	0	0	0	0.01	0	0.02	0	0.333333	0
12161	12161	Bmp6	0.58	0.24	0.5	0.92	0.78	0.83	1.16	0.48	0.99	1.85	1.58	1.67	29	12	25	44	38	40	0.44	0.843333	0.876667	1.7	22	40.6667
103967	103967	Dnm3	0.73	0.87	0.75	1.41	1.12	1.48	1.44	1.73	1.47	2.82	2.25	2.97	75	90	75	116	107	123	0.783333	1.33667	1.54667	2.68	80	115.333
116871	116871	Mta3	18.71	19.97	18.99	18.4	18.7	19.79	37.21	39.87	37.47	36.78	37.64	39.8	573	618	579	514	538	567	19.2233	18.9633	38.1833	38.0733	590	539.667
66425	66425	Pcp4l1	5.64	5.56	6.24	2.14	2.1	1.95	11.21	11.1	12.31	4.28	4.24	3.92	134	132	149	49	49	45	5.81333	2.06333	11.54	4.14667	138.333	47.6667
223978	223978	Cpped1	17.65	18.51	18.51	17.38	17.69	16.58	35.1	36.94	36.53	34.74	35.62	33.35	752	783	795	717	749	699	18.2233	17.2167	36.19	34.57	776.667	721.667
13032	13032	Ctsc	9.44	15.31	14.48	7.53	5.99	7.24	18.77	30.56	28.58	15.04	12.07	14.57	1076	1538	1292	537	514	526	13.0767	6.92	25.97	13.8933	1302	525.667
407243	407243	Tmem189	37.24	36.51	41.06	23.52	22.04	22.69	74.06	72.88	81.04	47	44.37	45.63	970	950	1074	589	562	574	38.27	22.75	75.9933	45.6667	998	575
14707	14707	Gng5	241.1	223.05	240.86	267.56	252.05	255.47	479.46	445.2	475.31	534.68	507.51	513.84	1165	1062	1191	1268	1224	1205	235.003	258.36	466.657	518.677	1139.33	1232.33
64704	64704	Htra2	33.58	34.97	35.19	40.67	40.04	40.79	66.78	69.79	69.44	81.28	80.61	82.04	890.02	925.77	936.34	1036.36	1038.77	1049.95	34.58	40.5	68.67	81.31	917.377	1041.69
78088	78088	Sowahb	0.02	0	0	0	0	0	0.03	0	0	0	0	0	1	0	0	0	0	0	0.00666667	0	0.01	0	0.333333	0
67196	67196	Ube2t	6.73	7.39	5.9	9.51	11.05	10.32	13.38	14.76	11.64	19	22.26	20.76	105	116	92	140	163	156	6.67333	10.2933	13.26	20.6733	104.333	153
229541	229541	Dennd4b	1.67	2.33	2.64	1.79	1.94	1.88	3.31	4.64	5.21	3.59	3.91	3.77	163	225	254	167	187	175	2.21333	1.87	4.38667	3.75667	214	176.333
27207	27207	Rps11	1072.15	1096.19	1120.02	1045.6	1104.59	1088.25	2132.12	2187.96	2210.19	2089.53	2224.1	2188.9	6484	6554	6900	6172	6672	6416	1096.12	1079.48	2176.76	2167.51	6646	6420
68092	68092	Ncbp2	40.7	38.58	40.04	38.48	37.49	37.78	80.94	77	79.02	76.91	75.48	76	1310	1241	1293	1190	1180	1181	39.7733	37.9167	78.9867	76.13	1281.33	1183.67
64656	64656	Mrps23	41.93	39.98	39.64	38.01	37.31	35.93	83.38	79.8	78.22	75.96	75.12	72.28	813	774	777	709	711	679	40.5167	37.0833	80.4667	74.4533	788	699.667
80288	80288	Bcl9l	17.37	20.09	16.55	10.14	9.83	10.88	34.54	40.11	32.65	20.26	19.8	21.88	2040	2347	1924	1123	1109	1226	18.0033	10.2833	35.7667	20.6467	2103.67	1152.67
108937	108937	Rnf169	9.39	9.41	8.91	5.76	5.87	6.1	18.68	18.79	17.59	11.52	11.82	12.28	1317	1303	1212	773	793	822	9.23667	5.91	18.3533	11.8733	1277.33	796
14067	14067	F5	0.67	0.81	0.81	0.05	0.04	0.05	1.34	1.62	1.6	0.1	0.08	0.1	88	106	106	6	5	6	0.763333	0.0466667	1.52	0.0933333	100	5.66667
210105	210105	Zfp719	3.4	3.88	3.89	3.82	3.96	4.12	6.77	7.75	7.68	7.63	7.98	8.29	293	335	335	315	330	344	3.72333	3.96667	7.4	7.96667	321	329.667
108150	108150	Galnt7	7.66	7.03	7.77	5.36	5.82	6	15.24	14.04	15.34	10.71	11.72	12.08	568	522	577	381	421	432	7.48667	5.72667	14.8733	11.5033	555.667	411.333
67493	67493	Mettl16	13.21	14.2	13.94	13.66	13.69	14.16	26.27	28.35	27.51	27.3	27.57	28.47	709	736	752	690	697	719	13.7833	13.8367	27.3767	27.78	732.333	702
78655	78655	Eif3j1	58.15	51.89	58.93	64.05	69.93	66.62	115.64	103.58	116.29	128	140.8	134	2269.93	2025.55	2306.34	2400.45	2667.07	2524.95	56.3233	66.8667	111.837	134.267	2200.61	2530.82
67235	67235	Zkscan14	2.02	2.28	1.79	1.14	1.13	1.26	4.02	4.55	3.53	2.27	2.27	2.53	63	71	56	34	33	38	2.03	1.17667	4.03333	2.35667	63.3333	35
214111	214111	Slc24a1	0.03	0.01	0	0	0.03	0.01	0.05	0.02	0	0	0.05	0.03	2	1	0	0	2	1	0.0133333	0.0133333	0.0233333	0.0266667	1	1
110265	110265	Msra	5.33	4.76	6.12	5.44	5.72	5.22	10.6	9.49	12.08	10.88	11.51	10.49	116	103	133	113	119	110	5.40333	5.46	10.7233	10.96	117.333	114
75659	75659	Wdr54	2.66	3.78	2.77	3.71	3.41	3.4	5.28	7.55	5.47	7.41	6.87	6.83	47	66	48	61	59	57	3.07	3.50667	6.1	7.03667	53.6667	59
70598	70598	Filip1	0.03	0.13	0.05	0.07	0.04	0.03	0.06	0.25	0.1	0.13	0.09	0.07	2	8	4	4	3	2	0.07	0.0466667	0.136667	0.0966667	4.66667	3
72654	72654	Ccdc12	32.88	30.67	32.02	36.93	34.67	33.69	65.38	61.22	63.19	73.81	69.81	67.76	335	309	328	360	346	332	31.8567	35.0967	63.2633	70.46	324	346
102633740	102633740	Gm31493	2.2	3.05	2.46	2.39	3.09	2.98	4.37	6.09	4.85	4.78	6.23	6	57.56	79.94	64.67	60.25	79.41	75.96	2.57	2.82	5.10333	5.67	67.39	71.8733
57373	57373	Akip1	12.7	14.97	13.16	15.79	14.44	14.51	25.26	29.88	25.97	31.54	29.08	29.19	180	210	189	215	200	200	13.61	14.9133	27.0367	29.9367	193	205
66578	66578	Mis18a	9.7	9.72	12.45	15.44	14.66	13.82	19.29	19.41	24.58	30.85	29.53	27.8	182	182	235	279	270	252	10.6233	14.64	21.0933	29.3933	199.667	267
17874	17874	Myd88	19.1	22.38	20.35	15.59	15.96	15.53	37.99	44.66	40.15	31.16	32.13	31.24	580	679	620	455	474	458	20.61	15.6933	40.9333	31.51	626.333	462.333
381356	381356	Cacfd1	18.69	18.78	18.25	13.5	13.37	11.69	37.18	37.49	36.02	26.99	26.93	23.52	657	684	655	462	456	414	18.5733	12.8533	36.8967	25.8133	665.333	444
26371	26371	Ciao1	10.78	10.86	10.63	9.77	9.08	8.75	21.45	21.67	20.97	19.53	18.29	17.6	551	555	544	479	453	434	10.7567	9.2	21.3633	18.4733	550	455.333
17967	17967	Ncam1	28.44	33.69	25.09	35.19	36.97	37.56	56.56	67.25	49.51	70.33	74.43	75.56	3146	3763	2772	3776	4053	4106	29.0733	36.5733	57.7733	73.44	3227	3978.33
98845	98845	Eps8l2	4.34	3.18	4.67	2.37	2.37	2.02	8.63	6.35	9.21	4.75	4.78	4.07	221	162	238	116	118	100	4.06333	2.25333	8.06333	4.53333	207	111.333
100101807	100101807	1700047I17Rik2	11.11	9.09	11.16	8.77	8.46	7.9	22.1	18.14	22.03	17.52	17.03	15.9	727.27	595.39	731.63	542.57	536.07	502.13	10.4533	8.37667	20.7567	16.8167	684.763	526.923
21413	21413	Tcf4	12.16	15.48	12.66	14.13	14.46	14.67	24.18	30.9	24.98	28.24	29.12	29.51	1590	2008	1613	1754	1816	1840	13.4333	14.42	26.6867	28.9567	1737	1803.33
235441	235441	Usp3	8.59	8.76	9.75	8.99	8.25	8.62	17.07	17.49	19.23	17.97	16.62	17.33	504	544	569	513	487	504	9.03333	8.62	17.93	17.3067	539	501.333
13990	13990	Smarcad1	15.67	13.26	14.03	14.26	13.73	12.98	31.16	26.47	27.68	28.5	27.64	26.1	919	923	894	754	779	772	14.32	13.6567	28.4367	27.4133	912	768.333
71831	71831	Iqcm	0	0	0	0	0	0.03	0	0	0	0	0	0.06	0	0	0	0	0	1	0	0.01	0	0.02	0	0.333333
69257	69257	Elf2	14.59	16.53	14.2	15.67	15.98	16.13	29.02	32.99	28.01	31.31	32.18	32.44	905	1049	900	924	951	964	15.1067	15.9267	30.0067	31.9767	951.333	946.333
11947	11947	Atp5b	712.66	662.33	697.65	657.7	640.16	650.66	1417.23	1321.98	1376.7	1314.34	1288.97	1308.73	20887	19397	20520	18525	18357	18520	690.88	649.507	1371.97	1304.01	20268	18467.3
100101806	100101806	Srp54c	45.84	48.69	42.29	40.47	41.82	43.48	91.17	97.18	83.46	80.88	84.2	87.45	1938.53	2067.08	1804.12	1675.45	1731.74	1812	45.6067	41.9233	90.6033	84.1767	1936.58	1739.73
115488023	115488023	LOC115488023	1.49	1.29	1.33	1.59	1.35	1.31	2.96	2.57	2.62	3.17	2.73	2.64	62.01	53.52	55.31	63.44	55.08	52.99	1.37	1.41667	2.71667	2.84667	56.9467	57.17
22417	22417	Wnt4	4.4	2.42	3.6	4.09	4.42	3.54	8.76	4.84	7.11	8.18	8.9	7.12	285	157	233.48	254	279	222.44	3.47333	4.01667	6.90333	8.06667	225.16	251.813
240025	240025	Dact2	0.39	0.24	0.42	0.81	0.75	0.49	0.77	0.47	0.82	1.62	1.52	0.99	18	11	19	36	34	22	0.35	0.683333	0.686667	1.37667	16	30.6667
216820	216820	Dhrs7b	15.4	13.7	13.36	15.48	15.03	15.84	30.63	27.35	26.36	30.93	30.26	31.86	351	302	316	350	347	361	14.1533	15.45	28.1133	31.0167	323	352.667
74126	74126	Syvn1	17.1	16.08	16.5	11.24	11.33	11.22	34	32.1	32.56	22.47	22.82	22.57	987	926	958	626	632	634	16.56	11.2633	32.8867	22.62	957	630.667
237052	237052	Tceal1	5.56	6.1	5.29	4.66	4.4	3.04	11.06	12.18	10.44	9.32	8.85	6.12	94	103	90	76	73	50	5.65	4.03333	11.2267	8.09667	95.6667	66.3333
211147	211147	2024-03-11	0.1	0	0	0.09	0.05	0	0.19	0	0	0.17	0.1	0	2	0	0	2	1	0	0.0333333	0.0466667	0.0633333	0.09	0.666667	1
12304	12304	Pdia4	102.61	114.62	108.39	92.54	91.69	94.19	204.05	228.77	213.9	184.93	184.62	189.46	4134	4618	4378	3579	3608	3684	108.54	92.8067	215.573	186.337	4376.67	3623.67
407800	407800	Ecm2	0.05	0.07	0.05	0.05	0.05	0.05	0.1	0.13	0.1	0.1	0.1	0.1	3	4	3	3	3	3	0.0566667	0.05	0.11	0.1	3.33333	3
15384	15384	Hnrnpab	264.67	233.74	275.62	326.38	327.1	327.83	526.34	466.54	543.9	652.25	658.62	659.4	10526.9	9307.78	11012.8	12482.9	12740.8	12680	258.01	327.103	512.26	656.757	10282.5	12634.6
14247	14247	Fli1	1.81	2.38	2.55	1.36	0.85	0.93	3.61	4.75	5.03	2.72	1.71	1.88	96	126	135	69	44	48	2.24667	1.04667	4.46333	2.10333	119	53.6667
75423	75423	Arl5a	56.64	50.56	55.27	58.57	60.53	63.31	112.63	100.92	109.06	117.04	121.88	127.33	5099	4557	4980	5053	5312	5531	54.1567	60.8033	107.537	122.083	4878.67	5298.67
19263	19263	Ptprb	1.58	1.29	1.57	0.39	0.38	0.47	3.15	2.57	3.11	0.78	0.77	0.94	336	273	334	79	79	96	1.48	0.413333	2.94333	0.83	314.333	84.6667
17968	17968	Ncam2	0.12	0.15	0.2	0	0.01	0.03	0.24	0.3	0.39	0	0.02	0.07	10	11	13	0	1	2	0.156667	0.0133333	0.31	0.03	11.3333	1
27660	27660	1700088E04Rik	1.04	1.27	1.06	1.37	1.25	0.84	2.08	2.53	2.09	2.74	2.51	1.69	16.3	21.27	17.43	20.73	19.03	12.41	1.12333	1.15333	2.23333	2.31333	18.3333	17.39
68107	68107	Cntd1	0.18	0.3	0.36	0.25	0.37	0.33	0.35	0.59	0.71	0.49	0.74	0.67	6.32	10.54	12.81	8.47	12.75	11.56	0.28	0.316667	0.55	0.633333	9.89	10.9267
67020	67020	Tmem88	3.01	2.72	3.57	2.43	2.26	1.85	5.98	5.42	7.05	4.86	4.55	3.72	72	65	86	56.07	53	43	3.1	2.18	6.15	4.37667	74.3333	50.69
232187	232187	Smyd5	24.75	21.02	23.16	28.27	28.72	28.79	49.21	41.95	45.7	56.5	57.82	57.91	1002	851	940	1099	1136	1132	22.9767	28.5933	45.62	57.41	931	1122.33
17749	17749	Polr2k	64.96	56.51	53.1	62	63.7	68.44	129.19	112.8	104.79	123.9	128.25	137.66	294.94	254.87	242.96	269.98	284.98	295.97	58.19	64.7133	115.593	129.937	264.257	283.643
70458	70458	2610318N02Rik	1.77	1.91	2.42	2.72	2.75	2.36	3.53	3.81	4.77	5.45	5.54	4.74	31	33	43	46	48	41	2.03333	2.61	4.03667	5.24333	35.6667	45
17535	17535	Mre11a	7.59	7.39	7.85	10.84	9.74	10.1	15.08	14.76	15.48	21.67	19.6	20.31	759	741	785	1040	948	979	7.61	10.2267	15.1067	20.5267	761.667	989
381629	381629	Atraid	42.2	49.74	40.49	42.08	38.78	40.76	83.91	99.29	79.9	84.08	78.07	81.99	538	631	520	517	487	504	44.1433	40.54	87.7	81.38	563	502.667
329977	329977	Fhad1	0.01	0	0	0.03	0.01	0	0.03	0	0	0.05	0.03	0	1	0	0	2	1	0	0.00333333	0.0133333	0.01	0.0266667	0.333333	1
102635496	102635496	Malrd1	0.13	0.06	0.04	0.01	0.04	0.01	0.25	0.12	0.08	0.02	0.09	0.02	15	7	5	1	5	1	0.0766667	0.02	0.15	0.0433333	9	2.33333
103711	103711	Pnpo	6.93	7.4	6.1	5.37	7.25	6.34	13.79	14.77	12.05	10.73	14.59	12.75	223	238	197	166	228	198	6.81	6.32	13.5367	12.69	219.333	197.333
70640	70640	Dcp2	5.7	6.07	6.56	5.39	6.68	6.49	11.33	12.11	12.95	10.78	13.46	13.06	869	927	1001	788	993	961	6.11	6.18667	12.13	12.4333	932.333	914
226525	226525	Rasal2	4.71	4.16	4.6	3.4	3.96	3.7	9.36	8.31	9.09	6.79	7.97	7.43	828	739.83	815	572	682	631.99	4.49	3.68667	8.92	7.39667	794.277	628.663
387512	387512	Tas2r135	0.08	0	0	0	0	0	0.16	0	0	0	0	0	1	0	0	0	0	0	0.0266667	0	0.0533333	0	0.333333	0
68310	68310	Zmym1	5.61	5.24	4.85	5.37	5.24	5.7	11.16	10.45	9.58	10.73	10.56	11.46	349	317	297	309	307	338	5.23333	5.43667	10.3967	10.9167	321	318
52592	52592	Brms1l	16.73	18.45	16.55	16.46	15.68	16.37	33.27	36.82	32.65	32.89	31.58	32.93	700	772	694	661	641	665	17.2433	16.17	34.2467	32.4667	722	655.667
381204	381204	Naaladl1	0.11	0.2	0.16	0.28	0.35	0.35	0.23	0.41	0.31	0.57	0.7	0.71	5	9	7	12	15	15	0.156667	0.326667	0.316667	0.66	7	14
223696	223696	Tomm22	104.41	91.45	97.37	106.34	96.01	100.13	207.64	182.52	192.15	212.51	193.31	201.4	1434	1251	1348	1410	1298	1337	97.7433	100.827	194.103	202.407	1344.33	1348.33
14761	14761	Gpr27	0.02	0.07	0.16	0.21	0.21	0.32	0.04	0.14	0.31	0.42	0.43	0.65	1	3	7	9	9.18	13.92	0.0833333	0.246667	0.163333	0.5	3.66667	10.7
319504	319504	Nrcam	2.04	1.5	2.22	0.4	0.46	0.45	4.06	2.99	4.37	0.8	0.93	0.91	328	239	347	62	73	71	1.92	0.436667	3.80667	0.88	304.667	68.6667
105193	105193	Nhlrc1	0.76	0.92	0.6	0.31	0.5	0.2	1.51	1.84	1.17	0.62	1.01	0.39	28	34	22	11	18	7	0.76	0.336667	1.50667	0.673333	28	12
213208	213208	Il20rb	1.19	1.17	1.22	1.63	1.55	1.38	2.37	2.33	2.4	3.26	3.13	2.78	48	47	49	63	61	54	1.19333	1.52	2.36667	3.05667	48	59.3333
329877	329877	Dennd4c	11.15	12	11.77	8.5	8.91	8.9	22.17	23.95	23.22	16.99	17.94	17.89	1540	1596	1503	1093	1079	1148	11.64	8.77	23.1133	17.6067	1546.33	1106.67
12287	12287	Cacna1b	0.21	0.27	0.22	0.51	0.48	0.42	0.42	0.53	0.44	1.02	0.97	0.85	34	44	35	80	78	66	0.233333	0.47	0.463333	0.946667	37.6667	74.6667
228413	228413	Prrg4	6.42	4.79	6.69	4.35	4.38	5.51	12.77	9.57	13.21	8.69	8.82	11.09	277	217	304	189	198	237	5.96667	4.74667	11.85	9.53333	266	208
76179	76179	Usp31	8.61	6.56	7.38	7.27	7.37	7.26	17.13	13.1	14.57	14.53	14.83	14.6	1565	1199	1361	1250	1299	1284	7.51667	7.3	14.9333	14.6533	1375	1277.67
76453	76453	Prss23	430.57	288.45	421.88	417.08	418.64	426.25	856.24	575.73	832.51	833.5	842.94	857.35	13849	9322	13613	13036	13162	13343	380.3	420.657	754.827	844.597	12261.3	13180.3
59053	59053	Hgh1	8.13	7.97	8.2	8.71	8.41	8.79	16.17	15.91	16.17	17.41	16.93	17.68	254	251	257	263	259	269	8.1	8.63667	16.0833	17.34	254	263.667
76400	76400	Pbp2	3.34	2.46	2.66	4.85	4.71	5.33	6.64	4.9	5.24	9.7	9.48	10.72	60	44	48	84	83	93	2.82	4.96333	5.59333	9.96667	50.6667	86.6667
76763	76763	Mospd2	25.4	24.23	22.47	18.34	17.62	19.01	50.51	48.36	44.34	36.66	35.48	38.23	1511	1427	1366	1112	1124	1162	24.0333	18.3233	47.7367	36.79	1434.67	1132.67
12217	12217	Bsn	0.05	0.1	0.07	0.06	0.06	0.08	0.09	0.2	0.13	0.11	0.12	0.16	13	32	21	16	17	24.33	0.0733333	0.0666667	0.14	0.13	22	19.11
67099	67099	Mettl21a	6.53	7.6	7.56	6.93	6.39	6.72	12.98	15.17	14.91	13.86	12.87	13.52	278	319	322	281	266	277	7.23	6.68	14.3533	13.4167	306.333	274.667
65111	65111	Dap3	44.47	47.39	43.31	46.64	47.19	46.28	88.43	94.59	85.47	93.2	95.02	93.09	1029	1076	1012	1051	1046	1061	45.0567	46.7033	89.4967	93.77	1039	1052.67
216976	216976	Rskr	0.02	0.04	0	0	0.02	0	0.04	0.08	0	0	0.05	0	1	2	0	0	1	0	0.02	0.00666667	0.04	0.0166667	1	0.333333
229488	229488	Fam160a1	2.09	2.59	1.93	1.75	1.59	1.59	4.15	5.16	3.82	3.49	3.19	3.21	155	193	145	125	116	115	2.20333	1.64333	4.37667	3.29667	164.333	118.667
67591	67591	Ubl4b	0.15	0.05	0.05	0	0.05	0.05	0.3	0.1	0.1	0	0.1	0.1	3	1	1	0	1	1	0.0833333	0.0333333	0.166667	0.0666667	1.66667	0.666667
20822	20822	Ro60	12.3	12.19	10.91	9.47	10.85	10.1	24.46	24.34	21.54	18.92	21.85	20.31	1765	1670	1598	1280	1488	1410	11.8	10.14	23.4467	20.36	1677.67	1392.67
93723	93723	Pcdhga11	2.78	3.09	2.66	3.12	2.59	2.58	5.53	6.16	5.25	6.23	5.21	5.18	225.23	250.1	215.67	241.83	204.14	202.39	2.84333	2.76333	5.64667	5.54	230.333	216.12
58239	58239	Dexi	7.2	6.12	6.19	6.16	5.25	4.85	14.32	12.21	12.21	12.31	10.57	9.75	146.75	124.47	126.79	120.85	104.94	96	6.50333	5.42	12.9133	10.8767	132.67	107.263
17341	17341	Bhlha15	0.02	0	0.02	0.02	0.02	0	0.03	0	0.03	0.04	0.04	0	1	0	1	1	1	0	0.0133333	0.0133333	0.02	0.0266667	0.666667	0.666667
112419	112419	Ifit1bl2	0.06	0.09	0.11	0.12	0.02	0.06	0.11	0.19	0.22	0.23	0.04	0.12	3	5	5.99	6	1	3	0.0866667	0.0666667	0.173333	0.13	4.66333	3.33333
74716	74716	Wbp2nl	0	0.05	0	0	0	0.05	0	0.1	0	0	0	0.11	0	1	0	0	0	1	0.0166667	0.0166667	0.0333333	0.0366667	0.333333	0.333333
116870	116870	Mta1	51.64	48.69	52.89	52.48	51.51	54.31	102.69	97.19	104.37	104.88	103.72	109.24	2029	1904	2057	1941	2001	2049	51.0733	52.7667	101.417	105.947	1996.67	1997
245631	245631	Pwwp3b	4.6	3.35	4.42	5.8	5.09	5.3	9.15	6.69	8.72	11.59	10.24	10.65	351	258	346	416	377	388	4.12333	5.39667	8.18667	10.8267	318.333	393.667
170761	170761	Pdzd3	0	0	0.06	0	0	0	0	0	0.11	0	0	0	0	0	2	0	0	0	0.02	0	0.0366667	0	0.666667	0
16834	16834	Cog1	13.22	14.46	13.58	14.83	14.95	15.66	26.29	28.86	26.79	29.65	30.1	31.49	676.1	737.82	696.59	737.84	745.29	777.42	13.7533	15.1467	27.3133	30.4133	703.503	753.517
319582	319582	Trmt9b	0.07	0.04	0.18	0.11	0.05	0	0.14	0.07	0.35	0.22	0.11	0	4	2	8	3	4	0	0.0966667	0.0533333	0.186667	0.11	4.66667	2.33333
211401	211401	Mtss1	1.96	2.83	3	1.19	1.43	1.48	3.9	5.64	5.91	2.38	2.87	2.98	172	238	263	105	119	120	2.59667	1.36667	5.15	2.74333	224.333	114.667
56306	56306	Sinhcaf	12.07	10.53	11.43	18.88	19.61	19.19	23.99	21.02	22.55	37.73	39.49	38.61	533	469	503	808	851	828	11.3433	19.2267	22.52	38.61	501.667	829
18387	18387	Oprk1	0.03	0.03	0	0.01	0	0	0.05	0.05	0	0.03	0	0	2	2	0	1	0	0	0.02	0.00333333	0.0333333	0.01	1.33333	0.333333
14151	14151	Fech	21.48	20.92	20.76	21.85	22.63	23.09	42.71	41.76	40.97	43.66	45.57	46.45	1042	1016	1009	1017	1073	1088	21.0533	22.5233	41.8133	45.2267	1022.33	1059.33
50753	50753	Fbxo8	3.64	3.63	3.58	2.56	3.09	3.33	7.25	7.24	7.06	5.12	6.22	6.7	214	214	210	145	178	190	3.61667	2.99333	7.18333	6.01333	212.667	171
330369	330369	Fbxo41	0.07	0.06	0.03	0.03	0.02	0.02	0.14	0.12	0.05	0.06	0.04	0.04	8	7	3	3	2	2	0.0533333	0.0233333	0.103333	0.0466667	6	2.33333
71709	71709	Syde1	40.74	37.25	39.26	45.61	44.73	41.74	81.02	74.35	77.48	91.14	90.06	83.95	2221	2049	2157	2395	2391	2210	39.0833	44.0267	77.6167	88.3833	2142.33	2332
17922	17922	Myo7b	0.03	0	0.01	0.03	0.04	0.01	0.07	0	0.02	0.05	0.07	0.02	4	0	1	3	4	1	0.0133333	0.0266667	0.03	0.0466667	1.66667	2.66667
258421	258421	Olfr223	0	0	0	0	0.08	0	0	0	0	0	0.16	0	0	0	0	0	1	0	0	0.0266667	0	0.0533333	0	0.333333
15208	15208	Hes5	0	0	0	0	0	0.04	0	0	0	0	0	0.08	0	0	0	0	0	1	0	0.0133333	0	0.0266667	0	0.333333
18749	18749	Prkacb	27.72	30.25	27.37	29.36	29.77	28.71	55.12	60.38	54.02	58.68	59.95	57.76	2044	2234	2023	2078	2140	2057	28.4467	29.28	56.5067	58.7967	2100.33	2091.67
19300	19300	Abcd4	6.24	7.63	6.67	5.32	5.83	5.48	12.42	15.24	13.16	10.64	11.74	11.03	263	322	282	215	243	226	6.84667	5.54333	13.6067	11.1367	289	228
74375	74375	Gcc1	7.56	8.85	8.01	6.13	5.85	5.89	15.04	17.66	15.8	12.25	11.78	11.85	533	624	565	414	402	403	8.14	5.95667	16.1667	11.96	574	406.333
11416	11416	Slc33a1	14.21	14.69	14.39	8.38	7.96	9.33	28.26	29.32	28.39	16.75	16.03	18.77	737.72	762.74	745.18	416.9	403.25	470.55	14.43	8.55667	28.6567	17.1833	748.547	430.233
245638	245638	Tbc1d8b	11.31	11.64	10.71	8.98	9.06	9.67	22.5	23.23	21.14	17.95	18.25	19.45	1157	1193	1099	881	904	960	11.22	9.23667	22.29	18.55	1149.67	915
66624	66624	Spcs2	58.66	57.13	60.73	53.78	56.11	52.49	116.65	114.03	119.83	107.48	112.98	105.57	2118	2044	2211	1902	1991	1923	58.84	54.1267	116.837	108.677	2124.33	1938.67
13666	13666	Eif2ak3	8.66	9.88	9.01	5.27	5.44	5.52	17.22	19.73	17.79	10.53	10.96	11.11	662	764	697	390	410	407	9.18333	5.41	18.2467	10.8667	707.667	402.333
232078	232078	Thnsl2	2.03	2.32	1.8	2.09	2.34	1.8	4.05	4.62	3.55	4.18	4.72	3.62	65	74	58	64	73	56	2.05	2.07667	4.07333	4.17333	65.6667	64.3333
246196	246196	Zfp277	7.08	7.46	7.14	8.66	9.25	8.91	14.09	14.89	14.09	17.3	18.63	17.91	237.07	248.07	241.06	275.89	302.48	286.91	7.22667	8.94	14.3567	17.9467	242.067	288.427
228361	228361	Ambra1	7.97	9.25	8.77	8.66	9.29	9.01	15.85	18.46	17.31	17.31	18.71	18.13	696	811	769	728	789	762	8.66333	8.98667	17.2067	18.05	758.667	759.667
52882	52882	Rgs7bp	0.91	1.32	1	0.46	0.54	0.38	1.82	2.64	1.98	0.92	1.09	0.77	98	141	108	47	57	39	1.07667	0.46	2.14667	0.926667	115.667	47.6667
14166	14166	Fgf11	0.36	0.52	0.28	0.12	0.07	0.07	0.71	1.04	0.54	0.24	0.13	0.14	22	31	19	7	4	4	0.386667	0.0866667	0.763333	0.17	24	5
110893	110893	Slc8a3	0.37	0.28	0.36	0.2	0.27	0.15	0.73	0.56	0.71	0.4	0.53	0.29	28	19	27	17	22	11	0.336667	0.206667	0.666667	0.406667	24.6667	16.6667
56635	56635	Prl2a1	0	0	0	0	0	0.09	0	0	0	0	0	0.19	0	0	0	0	0	1	0	0.03	0	0.0633333	0	0.333333
29810	29810	Bag3	42.12	37.42	41.34	33.06	30.36	31.42	83.77	74.69	81.58	66.07	61.13	63.2	1784	1585	1755	1344	1256	1292	40.2933	31.6133	80.0133	63.4667	1708	1297.33
330192	330192	Vps37b	11.92	10.11	11.8	11.48	11.68	10.54	23.71	20.18	23.28	22.94	23.52	21.2	487	413	483	450	466	418	11.2767	11.2333	22.39	22.5533	461	444.667
106393	106393	Srl	0.8	0.64	0.82	1.19	1.33	1.24	1.6	1.28	1.62	2.37	2.68	2.5	76	70	84	104	117	121	0.753333	1.25333	1.5	2.51667	76.6667	114
52202	52202	Rbm34	8.56	8.64	9.44	11.34	12.2	11.47	17.03	17.25	18.63	22.66	24.57	23.08	489	494	540	621	680	636	8.88	11.67	17.6367	23.4367	507.667	645.667
66356	66356	Knop1	17.46	15.87	18.64	19.09	18.11	18.9	34.73	31.67	36.77	38.15	36.47	38.01	1609	1464	1723	1687	1631.97	1691.96	17.3233	18.7	34.39	37.5433	1598.67	1670.31
399548	399548	Scn4b	0.01	0.01	0.01	0	0.01	0	0.02	0.02	0.02	0	0.03	0	1	1	1	0	1	0	0.01	0.00333333	0.02	0.01	1	0.333333
15239	15239	Hgs	35.48	34.77	34.65	39.44	41.65	39.91	70.56	69.39	68.38	78.82	83.85	80.28	1704	1671	1669	1819	1956	1862	34.9667	40.3333	69.4433	80.9833	1681.33	1879
50909	50909	C1ra	6.83	11.89	7.74	6.75	6.16	6.81	13.58	23.74	15.27	13.49	12.4	13.69	310	540	352	294	273	300	8.82	6.57333	17.53	13.1933	400.667	289
545647	545647	Gm13289	0.03	0.18	0.1	0	0.14	0.05	0.05	0.35	0.2	0	0.28	0.09	0.32	2.22	1.28	0	1.77	0.58	0.103333	0.0633333	0.2	0.123333	1.27333	0.783333
54219	54219	Cd320	6.29	6.49	5.96	6.16	6.17	6.27	12.5	12.94	11.75	12.31	12.42	12.61	222	229	211	209	213	215	6.24667	6.2	12.3967	12.4467	220.667	212.333
240518	240518	Peli3	0.61	0.93	0.68	0.34	0.27	0.26	1.21	1.86	1.35	0.69	0.54	0.52	42	62	45	18	18	17	0.74	0.29	1.47333	0.583333	49.6667	17.6667
19700	19700	Rem1	0.95	0.62	0.78	0.6	0.38	0.55	1.88	1.23	1.54	1.2	0.76	1.11	23	15	19	14	9	13	0.783333	0.51	1.55	1.02333	19	12
239318	239318	Plcxd3	0	0	0	0	0	0.03	0	0	0	0	0	0.07	0	0	0	0	0	1	0	0.01	0	0.0233333	0	0.333333
72190	72190	2510009E07Rik	5.08	7.36	6.87	2.6	3.27	3.01	10.11	14.69	13.56	5.19	6.58	6.04	453	657	613	222	284	260	6.43667	2.96	12.7867	5.93667	574.333	255.333
20650	20650	Sntb2	9.47	9.38	9.55	6.91	7.32	7.4	18.83	18.73	18.85	13.8	14.73	14.89	725	719	732	507	546	550	9.46667	7.21	18.8033	14.4733	725.333	534.333
73176	73176	3110040M04Rik	0.08	0.04	0	0	0.04	0	0.15	0.08	0	0	0.08	0	2	1	0	0	1	0	0.04	0.0133333	0.0766667	0.0266667	1	0.333333
15408	15408	Hoxb13	0.05	0.1	0	0.26	0.2	0.15	0.1	0.2	0	0.52	0.41	0.31	1	2	0	5	4	3	0.05	0.203333	0.1	0.413333	1	4
11474	11474	Actn3	0.48	0.52	0.31	0.39	0.43	0.41	0.96	1.05	0.62	0.79	0.87	0.83	23	25	15	18	20	19	0.436667	0.41	0.876667	0.83	21	19
242425	242425	Gabbr2	0	0	0.01	0.04	0.02	0.01	0	0	0.02	0.09	0.04	0.02	0	0	1	4	2	1	0.00333333	0.0233333	0.00666667	0.05	0.333333	2.33333
232236	232236	Ccdc174	9.7	8.83	9.3	8.43	7.77	9.24	19.29	17.62	18.35	16.84	15.64	18.59	265	242	254	221	206	245	9.27667	8.48	18.42	17.0233	253.667	224
101056017	101056017	Gm28802	0.05	0	0.05	0.05	0	0	0.1	0	0.1	0.11	0	0	2	0	2	2	0	0	0.0333333	0.0166667	0.0666667	0.0366667	1.33333	0.666667
14584	14584	Gfpt2	9.26	11.32	8.84	9.78	9.44	10.06	18.41	22.58	17.44	19.53	19.01	20.23	458	560	438	464	456	483	9.80667	9.76	19.4767	19.59	485.333	467.667
70799	70799	Cep192	7.64	7.72	7.8	9.19	8.97	9.33	15.2	15.4	15.4	18.37	18.06	18.77	1087	1098	1117	1258	1247	1293	7.72	9.16333	15.3333	18.4	1100.67	1266
211986	211986	Tmem18	10.62	11.8	10.76	9.69	8.93	8.96	21.12	23.55	21.24	19.35	17.99	18.03	520	578	528	455	427	426	11.06	9.19333	21.97	18.4567	542	436
433180	433180	Spink6	0	0	0.44	0.69	0.67	1.15	0	0	0.87	1.38	1.35	2.32	0	0	2	3	3	5	0.146667	0.836667	0.29	1.68333	0.666667	3.66667
104662	104662	Tsr1	40.32	35.08	38.56	41.44	40.85	40.9	80.18	70.01	76.09	82.82	82.26	82.27	2287.78	1991.36	2191.45	2255.38	2262.18	2252.82	37.9867	41.0633	75.4267	82.45	2156.86	2256.79
12499	12499	Entpd5	5.67	6.56	5.78	5.2	4.9	4.93	11.27	13.1	11.41	10.39	9.87	9.93	484	558	494	423	408	407	6.00333	5.01	11.9267	10.0633	512	412.667
210135	210135	Zfp180	7.83	7.23	8.36	6.68	7.09	7.16	15.58	14.43	16.49	13.35	14.27	14.4	520	482	557	428	461	463	7.80667	6.97667	15.5	14.0067	519.667	450.667
115485680	115485680	LOC115485680	0.07	0.07	0.08	0.09	0.09	0.08	0.14	0.14	0.16	0.18	0.18	0.16	103.82	106.48	116.2	128.72	130.66	116.76	0.0733333	0.0866667	0.146667	0.173333	108.833	125.38
329831	329831	Fam166b	0.05	0.05	0.05	0.07	0.11	0.1	0.1	0.11	0.1	0.14	0.22	0.21	3	3	3	3.87	3	3.79	0.05	0.0933333	0.103333	0.19	3	3.55333
634882	634882	Itih5l-ps	0	0	0.01	0	0	0	0	0	0.03	0	0	0	0	0	1	0	0	0	0.00333333	0	0.01	0	0.333333	0
13511	13511	Dsg2	0.01	0.05	0.07	0.02	0.03	0.02	0.02	0.1	0.14	0.04	0.06	0.04	1	5	7	2	3	2	0.0433333	0.0233333	0.0866667	0.0466667	4.33333	2.33333
219105	219105	Zmym5	12.97	13.71	12.57	10.64	10.49	10	25.78	27.37	24.81	21.26	21.12	20.11	735	782	690.09	565	549.49	568	13.0833	10.3767	25.9867	20.83	735.697	560.83
102566	102566	Ano10	26.24	30.21	26.15	23.58	24.1	24.51	52.18	60.29	51.59	47.11	48.53	49.29	1139	1305	1135	980	1019	1030	27.5333	24.0633	54.6867	48.31	1193	1009.67
27224	27224	Eloa	22.95	22.66	24.23	20.46	20.19	21.27	45.64	45.24	47.82	40.89	40.66	42.78	1807	1786	1910	1544	1550	1625	23.28	20.64	46.2333	41.4433	1834.33	1573
170772	170772	Glcci1	1.84	1.76	2.17	1.12	1.13	1.43	3.66	3.5	4.28	2.24	2.27	2.88	180	176	214	107	109	139	1.92333	1.22667	3.81333	2.46333	190	118.333
12857	12857	Cox4i1	540.51	539.2	535.45	461.17	444.22	446.12	1074.87	1076.23	1056.63	921.59	894.45	897.32	4659	4611	4673	3860	3793	3743	538.387	450.503	1069.24	904.453	4647.67	3798.67
12424	12424	Cck	134.11	87.3	114.22	84.37	85.08	90.67	266.71	174.25	225.41	168.61	171.31	182.37	1031	670	891	632	652	681	111.877	86.7067	222.123	174.097	864	655
71453	71453	Krtap2-4	0	0.1	0	0	0	0	0	0.2	0	0	0	0	0	1	0	0	0	0	0.0333333	0	0.0666667	0	0.333333	0
65115	65115	Bean1	0.65	0.95	0.81	0.45	0.48	0.32	1.3	1.9	1.6	0.9	0.96	0.64	33	40	33	19	22	15	0.803333	0.416667	1.6	0.833333	35.3333	18.6667
14870	14870	Gstp1	220.27	217.82	242.19	322.44	307.71	308.1	438.04	434.76	477.92	644.36	619.58	619.7	1901.66	1866.66	2118.06	2701.29	2632.97	2589.31	226.76	312.75	450.24	627.88	1962.13	2641.19
233575	233575	Pgap2	11.14	11.13	11.95	10.42	11.19	11.11	22.15	22.22	23.57	20.82	22.54	22.35	379	385	403	345	365	365	11.4067	10.9067	22.6467	21.9033	389	358.333
244183	244183	Trim30b	0	0	0.04	0	0	0	0	0	0.07	0	0	0	0	0	1.6	0	0	0	0.0133333	0	0.0233333	0	0.533333	0
66687	66687	Tbc1d15	25.87	26.26	23.87	22	23.58	25.53	51.45	52.41	47.11	43.96	47.47	51.35	1521	1549	1394	1256	1373	1456	25.3333	23.7033	50.3233	47.5933	1488	1361.67
72844	72844	Kctd17	39.85	39.08	40.89	33.54	35.46	32.61	79.24	78	80.69	67.03	71.41	65.58	1467	1402	1435	1202	1219	1133	39.94	33.87	79.31	68.0067	1434.67	1184.67
193116	193116	Slu7	15.81	16.47	13.81	14.47	14.31	14.45	31.44	32.87	27.25	28.92	28.81	29.06	981	1022	857	862	865	874	15.3633	14.41	30.52	28.93	953.333	867
74249	74249	Lrrc2	0.05	0.06	0.13	0.03	0.03	0	0.1	0.13	0.26	0.07	0.07	0	3	4	9	2	2	0	0.08	0.02	0.163333	0.0466667	5.33333	1.33333
14433	14433	Gapdh	2173.81	2187.47	2261.98	2021.87	1906.99	1971.7	4322.93	4366.09	4463.68	4040.5	3839.75	3965.85	45633.7	45853	47731.5	40871.9	39255.5	40230.9	2207.75	1966.85	4384.23	3948.7	46406.1	40119.4
381246	381246	Xkr9	0	0	0	0	0.04	0	0	0	0	0	0.07	0	0	0	0	0	1	0	0	0.0133333	0	0.0233333	0	0.333333
16211	16211	Kpnb1	183.61	156.35	180.64	186.55	191.29	195.88	365.13	312.06	356.46	372.8	385.16	394	18860	16079	18569	18362	19150	19527	173.533	191.24	344.55	383.987	17836	19013
20853	20853	Stau1	32.55	33.89	31.8	29.09	31.8	29.64	64.72	67.64	62.76	58.14	64.03	59.62	1973	2055	1930	1691	1880	1738	32.7467	30.1767	65.04	60.5967	1986	1769.67
69325	69325	1700012B09Rik	0.79	0.4	1.42	0.41	1.85	0.94	1.57	0.79	2.81	0.81	3.73	1.9	6	3	11	3	14	7	0.87	1.06667	1.72333	2.14667	6.66667	8
170938	170938	Zfp617	9.08	8.18	7.88	7.2	7.24	7.01	18.06	16.32	15.54	14.39	14.59	14.1	443	399	385	337	345	332	8.38	7.15	16.64	14.36	409	338
268933	268933	Wdr24	5.18	5.9	5	6.11	5.05	4.74	10.3	11.77	9.86	12.21	10.17	9.53	267	304	258	302	254	237	5.36	5.3	10.6433	10.6367	276.333	264.333
53312	53312	Nub1	22.31	27.06	23.64	18.13	18.92	17.93	44.36	54.02	46.66	36.22	38.1	36.07	1220	1481	1295	951	1010	952	24.3367	18.3267	48.3467	36.7967	1332	971
98970	98970	Fibcd1	0.1	0.1	0.33	0.22	0.27	0.28	0.19	0.2	0.65	0.43	0.55	0.56	8	9	27	17	23	22	0.176667	0.256667	0.346667	0.513333	14.6667	20.6667
619547	619547	Rpl34-ps1	0.39	0.42	1.23	0	0	0.99	0.78	0.83	2.43	0	0	1.98	1.05	1.09	3.43	0	0	2.6	0.68	0.33	1.34667	0.66	1.85667	0.866667
66355	66355	Gmpr	5.88	5.84	5.39	4.68	4.59	4.8	11.7	11.66	10.64	9.36	9.25	9.65	143	140	132	110	110	114	5.70333	4.69	11.3333	9.42	138.333	111.333
225791	225791	Zadh2	28.42	27.39	27.3	25.47	24.26	25.42	56.52	54.67	53.87	50.9	48.86	51.13	1617	1548	1556	1393	1342	1402	27.7033	25.05	55.02	50.2967	1573.67	1379
59013	59013	Hnrnph1	143.69	139.77	168	153.85	153.44	161.4	285.75	278.97	331.52	307.46	308.96	324.64	4869	4733	5661	5084	5144	5343	150.487	156.23	298.747	313.687	5087.67	5190.33
71313	71313	Fsip1	0.28	0.52	0.4	0.64	0.48	0.45	0.57	1.04	0.79	1.27	0.96	0.91	10	17	12	19	13	15	0.4	0.523333	0.8	1.04667	13	15.6667
215446	215446	Entpd3	0	0.05	0.03	0	0.02	0	0	0.1	0.07	0	0.04	0	0	3	2	0	1	0	0.0266667	0.00666667	0.0566667	0.0133333	1.66667	0.333333
22200	22200	Uba3	73.65	78.13	81.44	86.62	87.68	95.21	146.46	155.94	160.7	173.11	176.55	191.51	2455	2418	2440	2523	2674	2826	77.74	89.8367	154.367	180.39	2437.67	2674.33
114873	114873	Dscaml1	0	0	0	0	0	0.01	0	0	0	0	0	0.02	0	0	0	0	0	1	0	0.00333333	0	0.00666667	0	0.333333
70945	70945	Mmrn1	0.01	0	0	0	0	0	0.03	0	0	0	0	0	1	0	0	0	0	0	0.00333333	0	0.01	0	0.333333	0
68197	68197	Ndufc2	126.51	124.67	131.08	121.16	133.33	128.79	251.57	248.83	258.67	242.13	268.47	259.05	947	925	996	882	992	939	127.42	127.76	253.023	256.55	956	937.667
216154	216154	Med16	10.89	9.98	11.22	9.95	9.85	9.14	21.65	19.92	22.14	19.89	19.83	18.39	584	534.01	602.56	510.25	515.09	475	10.6967	9.64667	21.2367	19.37	573.523	500.113
235415	235415	Cplx3	0.06	0.02	0	0.02	0	0	0.13	0.04	0	0.04	0	0	3	1	0	1	0	0	0.0266667	0.00666667	0.0566667	0.0133333	1.33333	0.333333
227288	227288	Cxcr1	0.08	0.06	0.03	0	0	0	0.16	0.13	0.05	0	0	0	1	1	1	0	0	0	0.0566667	0	0.113333	0	1	0
243780	243780	E330009J07Rik	0.94	1.24	0.97	0.91	1.02	0.94	1.87	2.47	1.91	1.82	2.05	1.9	111	146	114	103	117	108	1.05	0.956667	2.08333	1.92333	123.667	109.333
11768	11768	Ap1m2	0	0	0	0.04	0	0	0	0	0	0.08	0	0	0	0	0	1	0	0	0	0.0133333	0	0.0266667	0	0.333333
67169	67169	Nradd	41.08	37.39	37.94	43.82	44.93	43.72	81.7	74.62	74.87	87.57	90.47	87.94	669	607	622	688	719	692	38.8033	44.1567	77.0633	88.66	632.667	699.667
24109	24109	Ubl3	21.4	20.09	20.79	13.88	13.8	15.21	42.56	40.09	41.03	27.75	27.78	30.6	861	789	853	560	554	622	20.76	14.2967	41.2267	28.71	834.333	578.667
234549	234549	Heatr3	27.22	25.17	27	30.07	30.49	32.41	54.13	50.23	53.28	60.08	61.39	65.18	1426	1319	1417	1511	1559	1648	26.4633	30.99	52.5467	62.2167	1387.33	1572.67
73254	73254	Ccdc18	0.64	0.73	0.77	1.09	0.98	1.17	1.27	1.45	1.51	2.18	1.98	2.36	54	60	61	91	75	94	0.713333	1.08	1.41	2.17333	58.3333	86.6667
14985	14985	H2-M10.1	0	0	0	0.06	0	0	0	0	0	0.12	0	0	0	0	0	1	0	0	0	0.02	0	0.04	0	0.333333
20509	20509	Slc19a1	11.24	10.89	11.59	19.59	19.33	17.35	22.35	21.74	22.86	39.15	38.91	34.9	422	415	442	714	717	641	11.24	18.7567	22.3167	37.6533	426.333	690.667
11534	11534	Adk	67.17	62.54	62.35	52.98	56	58.82	133.58	124.83	123.04	105.88	112.75	118.31	1772	1695	1728	1393	1522	1548	64.02	55.9333	127.15	112.313	1731.67	1487.67
319586	319586	Celf5	0.24	0.36	0.27	0.22	0.13	0.16	0.48	0.71	0.53	0.44	0.27	0.33	18	27	20	16	10	12	0.29	0.17	0.573333	0.346667	21.6667	12.6667
236915	236915	Arhgef9	0.99	1.28	1.32	1.55	1.52	1.63	1.97	2.56	2.6	3.1	3.07	3.28	94	124	127	144	143	153	1.19667	1.56667	2.37667	3.15	115	146.667
225289	225289	AW554918	1.74	1.51	1.88	2.75	2.49	2.71	3.46	3.02	3.7	5.49	5.02	5.44	162	135	175	232	225	237	1.71	2.65	3.39333	5.31667	157.333	231.333
19223	19223	Ptgis	15.96	17.25	13.68	10.72	10.78	9.77	31.75	34.44	27	21.42	21.7	19.65	451	487	388	291	298	268	15.63	10.4233	31.0633	20.9233	442	285.667
19264	19264	Ptprc	3.39	4.28	5.45	0.02	0.13	0.1	6.74	8.55	10.76	0.05	0.27	0.2	298	375	479	2	11	8	4.37333	0.0833333	8.68333	0.173333	384	7
68675	68675	Fam172a	10.72	10.04	9.52	12.85	11.92	13	21.32	20.03	18.78	25.68	24.01	26.16	625	643	617.01	743.01	709	779.01	10.0933	12.59	20.0433	25.2833	628.337	743.673
19046	19046	Ppp1cb	70.96	69.54	66.46	62.11	65.43	64.38	141.11	138.8	131.16	124.11	131.75	129.49	4852	4759	4551	4072	4364	4273	68.9867	63.9733	137.023	128.45	4720.67	4236.33
56380	56380	Arid3b	1.63	1.33	1.41	1.36	1.32	1.1	3.24	2.65	2.79	2.73	2.66	2.21	96	71	74	82	72	61	1.45667	1.26	2.89333	2.53333	80.3333	71.6667
102643076	102643076	Gm38655	0	0	0	0.02	0	0	0	0	0	0.05	0	0	0	0	0	1	0	0	0	0.00666667	0	0.0166667	0	0.333333
213988	213988	Tnrc6b	3.43	3.7	3.43	2.65	2.61	2.59	6.82	7.39	6.76	5.29	5.25	5.2	1055	1141	1055	779	780	771	3.52	2.61667	6.99	5.24667	1083.67	776.667
27280	27280	Phlda3	113.24	102.22	101.59	80.59	78.89	74.69	225.19	204.03	200.48	161.05	158.84	150.22	2469	2225	2226	1691	1686	1582	105.683	78.0567	209.9	156.703	2306.67	1653
235184	235184	Msantd2	7.65	8.58	7.94	11	11	11.14	15.22	17.12	15.68	21.97	22.15	22.41	543.07	634.95	586.59	764.02	828.82	828.04	8.05667	11.0467	16.0067	22.1767	588.203	806.96
72338	72338	Wdr89	2.45	2.42	2.79	3.15	2.92	3.17	4.87	4.84	5.51	6.3	5.88	6.39	120.92	119.75	138.18	149.36	140.71	152.18	2.55333	3.08	5.07333	6.19	126.283	147.417
13200	13200	Ddost	114.02	119.52	116.83	103.86	102.83	103.76	226.75	238.56	230.55	207.55	207.05	208.69	3807	3989	3913	3331	3357	3364	116.79	103.483	231.953	207.763	3903	3350.67
67871	67871	Mrrf	10.67	9.85	10.08	10.2	10.49	11.36	21.21	19.67	19.89	20.38	21.11	22.85	393.28	369.26	369.55	361.51	380.82	405.28	10.2	10.6833	20.2567	21.4467	377.363	382.537
382252	382252	Bclaf3	4.27	4.27	4.34	4.51	5.26	5.54	8.5	8.53	8.57	9.02	10.59	11.13	240	240	245	244	290	302	4.29333	5.10333	8.53333	10.2467	241.667	278.667
399566	399566	Btbd6	5.35	4.99	4.83	4.67	4.6	3.77	10.63	9.96	9.52	9.33	9.26	7.58	185	179	171	159	160	131	5.05667	4.34667	10.0367	8.72333	178.333	150
14058	14058	F10	0	0.02	0	0	0	0	0	0.05	0	0	0	0	0	1	0	0	0	0	0.00666667	0	0.0166667	0	0.333333	0
243374	243374	Gimap8	0.11	0.13	0.08	0.1	0.02	0.02	0.23	0.27	0.15	0.2	0.04	0.04	6	7	4	5	1	1	0.106667	0.0466667	0.216667	0.0933333	5.66667	2.33333
21419	21419	Tfap2b	0.1	0.2	0.21	0.07	0.2	0.11	0.2	0.41	0.41	0.14	0.41	0.22	10	18	15	6	17	10	0.17	0.126667	0.34	0.256667	14.3333	11
27204	27204	Syn3	0.09	0.17	0.1	0.2	0.23	0.28	0.17	0.34	0.2	0.4	0.46	0.56	19.37	31.12	21.61	21.74	43.49	34.38	0.12	0.236667	0.236667	0.473333	24.0333	33.2033
16768	16768	Lag3	0.25	0.41	0.38	0.33	0.16	0.07	0.5	0.82	0.75	0.66	0.33	0.13	8	13	12	10	5	2	0.346667	0.186667	0.69	0.373333	11	5.66667
67573	67573	Loxl4	17.01	15.3	15.02	10.55	9.92	10.24	33.82	30.54	29.63	21.08	19.98	20.6	1600	1441	1414	951	910	935	15.7767	10.2367	31.33	20.5533	1485	932
666190	666190	Gm7972	0.15	0.13	0.1	0.16	0.12	0.16	0.29	0.25	0.21	0.31	0.24	0.32	12	9	7	9	7	10	0.126667	0.146667	0.25	0.29	9.33333	8.66667
67830	67830	Rer1	114.5	108.48	109.77	104.53	100.88	103.45	227.71	216.52	216.61	208.88	203.11	208.07	2858.81	2689	2748.63	2518	2479	2522.5	110.917	102.953	220.28	206.687	2765.48	2506.5
68734	68734	Ppp4r3a	17.61	16.4	17.72	16.55	17.77	17.85	35.01	32.73	34.96	33.08	35.77	35.9	1378	1285	1388	1245	1358	1354	17.2433	17.39	34.2333	34.9167	1350.33	1319
76890	76890	Memo1	66.12	62.39	69.81	74.55	70.71	74.15	131.48	124.52	137.75	148.98	142.38	149.14	1703.05	1600	1816	1835.37	1803.67	1835	66.1067	73.1367	131.25	146.833	1706.35	1824.68
76459	76459	Car12	1.25	1.38	1.67	1.02	1.29	1.18	2.49	2.76	3.29	2.04	2.59	2.36	78	86	104	61	79	71	1.43333	1.16333	2.84667	2.33	89.3333	70.3333
240084	240084	Cchcr1	10.74	10.35	10.96	13.84	13.61	13.69	21.35	20.67	21.62	27.66	27.39	27.54	497	474	503	625	636	619	10.6833	13.7133	21.2133	27.53	491.333	626.667
640543	640543	Tgm7	0	0	0	0	0	0.04	0	0	0	0	0	0.09	0	0	0	0	0	1	0	0.0133333	0	0.03	0	0.333333
69697	69697	Camsap3	0.04	0.01	0	0	0	0.01	0.08	0.03	0	0	0	0.03	2	1	0	0	0	1	0.0166667	0.00333333	0.0366667	0.01	1	0.333333
14106	14106	Foxh1	0	0.07	0.05	0	0	0.05	0	0.14	0.1	0	0	0.1	0	4	1	0	0	1	0.04	0.0166667	0.08	0.0333333	1.66667	0.333333
22169	22169	Cmpk2	0.19	0.21	0.32	0.24	0.25	0.27	0.37	0.41	0.63	0.47	0.5	0.55	10	11	17	12	13	14	0.24	0.253333	0.47	0.506667	12.6667	13
217517	217517	Stxbp6	0.28	0.31	0.42	0.49	0.4	0.47	0.57	0.61	0.83	0.98	0.81	0.94	21	23	31	35	29	34	0.336667	0.453333	0.67	0.91	25	32.6667
212516	212516	Efcab12	0.22	0.36	0.02	0.13	0.07	0.22	0.43	0.72	0.05	0.25	0.15	0.45	6	15	1	5	3	9	0.2	0.14	0.4	0.283333	7.33333	5.66667
17777	17777	Mttp	1.09	1.12	1.22	1.25	1	1.09	2.17	2.24	2.42	2.5	2.01	2.19	72	72	83	79	68	71	1.14333	1.11333	2.27667	2.23333	75.6667	72.6667
55950	55950	Bri3	42.38	37.86	41.7	43.49	42.72	42.93	84.29	75.56	82.29	86.91	86.02	86.36	535	473	531	529	530	527	40.6467	43.0467	80.7133	86.43	513	528.667
19683	19683	Rdh16	0	0	0	0.03	0	0	0	0	0	0.06	0	0	0	0	0	1	0	0	0	0.01	0	0.02	0	0.333333
56541	56541	Habp4	16.01	14.29	15.14	13.87	14.61	13.56	31.84	28.52	29.88	27.72	29.41	27.28	670	598	635	557	597	551	15.1467	14.0133	30.08	28.1367	634.333	568.333
54609	54609	Ubqln2	20.14	18.66	19.48	22.38	22.44	21.49	40.05	37.24	38.44	44.73	45.18	43.22	1123	1041	1088	1197	1221	1163	19.4267	22.1033	38.5767	44.3767	1084	1193.67
239985	239985	Arid1b	7.36	7.8	7.3	7.89	8.15	7.74	14.64	15.58	14.41	15.76	16.41	15.58	997	1063	999	1019	1070	1025	7.48667	7.92667	14.8767	15.9167	1019.67	1038
230895	230895	Vps13d	5.51	6.49	5.46	4.47	4.54	4.49	10.97	12.96	10.78	8.93	9.14	9.02	1548	1831	1540	1200	1215	1219	5.82	4.5	11.57	9.03	1639.67	1211.33
12428	12428	Ccna2	24.21	21.3	26.66	37.52	37.33	39.97	48.14	42.52	52.6	74.99	75.16	80.39	1369.47	1205.83	1510.68	2036.28	2060.99	2195.09	24.0567	38.2733	47.7533	76.8467	1361.99	2097.45
18169	18169	Npy6r	0.02	0.05	0	0	0	0	0.05	0.09	0	0	0	0	1	2	0	0	0	0	0.0233333	0	0.0466667	0	1	0
50493	50493	Txnrd1	161.52	117.93	169.68	208	212.52	211.28	321.2	235.38	334.84	415.66	427.9	424.96	9236	6752	9731	11418	11871	11729	149.71	210.6	297.14	422.84	8573	11672.7
241158	241158	Ankmy1	0.07	0.04	0.1	0.19	0.07	0.07	0.14	0.07	0.2	0.39	0.15	0.15	5.23	2	7.34	13.55	5.29	5.21	0.07	0.11	0.136667	0.23	4.85667	8.01667
16564	16564	Kif21a	1.45	1.64	1.64	1.64	1.82	1.6	2.88	3.27	3.24	3.28	3.66	3.21	159	186	184	176	198	175	1.57667	1.68667	3.13	3.38333	176.333	183
19166	19166	Psma2	187.69	171.58	189.64	199	202.52	203.02	373.25	342.47	374.22	397.68	407.77	408.35	2311	2103	2356	2368	2458	2431	182.97	201.513	363.313	404.6	2256.67	2419
107686	107686	Snrpd2	218.13	189.11	223.51	221.79	222.25	217.82	433.79	377.46	441.06	443.22	447.5	438.11	922	799	994	937	958	902	210.25	220.62	417.437	442.943	905	932.333
11889	11889	Asgr1	0.03	0.38	0.25	0.26	0.13	0.19	0.07	0.76	0.49	0.52	0.25	0.38	3	8	8	6	4	4	0.22	0.193333	0.44	0.383333	6.33333	4.66667
321007	321007	Serac1	2.71	2.49	2.7	2.54	2.53	2.31	5.39	4.97	5.33	5.08	5.1	4.64	252.93	242	249.83	227.68	213.19	205.66	2.63333	2.46	5.23	4.94	248.253	215.51
18295	18295	Ogn	10.43	16.06	8.8	2.83	2.61	2.75	20.74	32.06	17.37	5.65	5.25	5.52	442	681	374	115	108	113	11.7633	2.73	23.39	5.47333	499	112
20111	20111	Rps6ka1	3.57	4.12	4.61	3.26	3.04	3.32	7.11	8.21	9.11	6.51	6.13	6.67	184	213	239	163	155	168	4.1	3.20667	8.14333	6.43667	212	162
170749	170749	Mtmr4	12.43	11.36	13.2	11.4	10.67	11.44	24.72	22.68	26.04	22.78	21.48	23	1274	1163	1354	1117	1068	1148	12.33	11.17	24.48	22.42	1263.67	1111
12321	12321	Calu	536.14	586.52	489.82	445.67	447.82	452.48	1066.19	1170.67	966.58	890.63	901.69	910.12	28898	31629	26448	23043	23558	23675	537.493	448.657	1067.81	900.813	28991.7	23425.3
74485	74485	Lrrc71	0.03	0.04	0.14	0.07	0.11	0.06	0.06	0.08	0.27	0.14	0.21	0.11	2.07	2.04	6.04	3.08	5.05	3.06	0.07	0.08	0.136667	0.153333	3.38333	3.73
12983	12983	Csf2rb	1.65	2.16	3.63	0.17	0.25	0.15	3.28	4.31	7.16	0.35	0.5	0.3	135.24	177	297.54	13.59	20	12	2.48	0.19	4.91667	0.383333	203.26	15.1967
101206	101206	Tada3	13.42	13.1	13.65	13.6	15.26	14.07	26.68	26.15	26.93	27.18	30.74	28.3	426	415	431	412	476	436	13.39	14.31	26.5867	28.74	424	441.333
381196	381196	Gm960	0	0.06	0	0.03	0.06	0.03	0	0.11	0	0.06	0.13	0.06	0	2	0	1	2	1	0.02	0.04	0.0366667	0.0833333	0.666667	1.33333
23827	23827	Bpnt1	30.55	24.01	29.81	24.58	26.35	26.21	60.74	47.93	58.83	49.12	53.05	52.72	1068.86	843	1055.64	830	901	898.01	28.1233	25.7133	55.8333	51.63	989.167	876.337
103768	103768	Tubg2	2.53	2.73	1.6	2.35	2.22	1.9	5.03	5.46	3.15	4.7	4.48	3.82	69.08	74.99	44	62.06	59	49	2.28667	2.15667	4.54667	4.33333	62.69	56.6867
338362	338362	Ust	3.41	4.29	2.98	4.62	5.12	4.86	6.77	8.56	5.88	9.24	10.31	9.78	249	314	218	324	365	345	3.56	4.86667	7.07	9.77667	260.333	344.667
24010	24010	Ik	62.21	69.95	65.66	61.81	60.07	58.92	123.72	139.62	129.56	123.52	120.94	118.52	1956	2198	2071	1867	1847	1799	65.94	60.2667	130.967	120.993	2075	1837.67
21968	21968	Tom1	23.28	23.31	23.68	25.8	24.99	23.85	46.3	46.53	46.73	51.55	50.32	47.98	854	855	869	908	897	850	23.4233	24.88	46.52	49.95	859.333	885
78929	78929	Polr3h	8.52	7.68	8.89	13.15	10.34	10.75	16.95	15.33	17.54	26.29	20.82	21.63	327	314	315	412	379	369	8.36333	11.4133	16.6067	22.9133	318.667	386.667
217664	217664	Mgat2	48.84	46.4	53.02	49.79	50.22	50.06	97.12	92.61	104.63	99.49	101.11	100.69	2087	1983	2271	2042	2096	2077	49.42	50.0233	98.12	100.43	2113.67	2071.67
106407	106407	Slc51a	0	0.04	0.04	0	0	0	0	0.09	0.08	0	0	0	0	1	1	0	0	0	0.0266667	0	0.0566667	0	0.666667	0
15039	15039	H2-T22	42.52	51.95	43.26	33.22	35.5	35.57	84.56	103.69	85.37	66.39	71.47	71.55	1147	1397.99	1166.98	867	934	931	45.91	34.7633	91.2067	69.8033	1237.32	910.667
71952	71952	Riox1	5.05	4.81	5.33	7.13	6.55	6.13	10.04	9.61	10.51	14.25	13.19	12.33	191	182	202	258.9	242	225	5.06333	6.60333	10.0533	13.2567	191.667	241.967
11522	11522	Adh1	2.33	3.02	1.59	2.37	1.78	2.95	4.63	6.02	3.14	4.74	3.59	5.93	48	62	33	47	36	59	2.31333	2.36667	4.59667	4.75333	47.6667	47.3333
170656	170656	Krtap21-1	0.11	0	0.34	0.12	0	0.24	0.23	0	0.67	0.24	0	0.47	1	0	3	1	0	2	0.15	0.12	0.3	0.236667	1.33333	1
217353	217353	Tmc6	7.77	8.09	7.52	6.55	6.83	6.5	15.45	16.15	14.83	13.1	13.75	13.07	374	395	371	310	328	306	7.79333	6.62667	15.4767	13.3067	380	314.667
11431	11431	Acp1	25.87	24.41	27.74	30.36	28.75	29.66	51.45	48.72	54.73	60.67	57.88	59.66	1337	1262	1436	1505	1450	1488	26.0067	29.59	51.6333	59.4033	1345	1481
14389	14389	Gab2	6.63	7.28	7.14	7.85	7.53	7.1	13.19	14.54	14.09	15.68	15.16	14.28	693	762	747	786	767	720	7.01667	7.49333	13.94	15.04	734	757.667
21384	21384	Tbx15	24.3	28.29	23.81	22.56	22.25	21.39	48.32	56.47	46.98	45.08	44.8	43.03	1440	1685	1424	1282	1296	1245	25.4667	22.0667	50.59	44.3033	1516.33	1274.33
319740	319740	Zfyve27	4.43	4.87	4.85	4.68	4.49	4.31	8.82	9.73	9.57	9.35	9.04	8.67	424	466	464	429	418	399	4.71667	4.49333	9.37333	9.02	451.333	415.333
105246975	105246975	Gm42163	0	0	0	0	0.01	0	0	0	0	0	0.01	0	0	0	0	0	0.06	0	0	0.00333333	0	0.00333333	0	0.02
67869	67869	Paip2	57.14	62.94	57.82	41.81	41.74	41.27	113.64	125.62	114.09	83.56	84.04	83.01	1275	1397	1290	895	905	892	59.3	41.6067	117.783	83.5367	1320.67	897.333
212919	212919	Kctd7	1.99	2.06	2.12	0.57	0.83	0.98	3.96	4.11	4.19	1.14	1.68	1.96	128	135	134	40	55	61	2.05667	0.793333	4.08667	1.59333	132.333	52
226016	226016	Abhd17b	13.57	12.14	12.77	11.3	12.17	12.07	26.99	24.24	25.2	22.57	24.51	24.27	546	490	516	440	479	474	12.8267	11.8467	25.4767	23.7833	517.333	464.333
71950	71950	Nanog	0.07	0.16	0.1	0.07	0.07	0.16	0.15	0.32	0.19	0.13	0.13	0.33	2.65	5	3.01	2	2	5	0.11	0.1	0.22	0.196667	3.55333	3
628456	628456	Gm6880	0	0	0	0	0.09	0	0	0	0	0	0.18	0	0	0	0	0	1	0	0	0.03	0	0.06	0	0.333333
53376	53376	Usp2	2.21	2.32	2.16	1.92	2.3	2.3	4.39	4.64	4.27	3.83	4.64	4.63	138	152	133	116	141	139	2.23	2.17333	4.43333	4.36667	141	132
232853	232853	Zfp954	4.1	3.67	3.5	4.53	3.69	3.33	8.16	7.32	6.91	9.05	7.42	6.69	132	118	113	140	116	104	3.75667	3.85	7.46333	7.72	121	120
230909	230909	Gm572	0.05	0.1	0.15	0	0	0	0.1	0.2	0.3	0	0	0	2	4	6	0	0	0	0.1	0	0.2	0	4	0
320873	320873	Cdh10	3.05	3.41	2.48	4.37	5.49	5.02	6.07	6.8	4.89	8.74	11.05	10.09	168	188	134	232	290	264	2.98	4.96	5.92	9.96	163.333	262
320302	320302	Glt28d2	0.49	0.8	0.33	0.39	0.52	0.6	0.97	1.6	0.66	0.79	1.06	1.2	22	36	15	17	23	26	0.54	0.503333	1.07667	1.01667	24.3333	22
75717	75717	Cul5	19.71	19.52	17.69	17.49	19.55	19.66	39.2	38.96	34.9	34.94	39.36	39.54	1842	1845	1708	1633	1832	1766	18.9733	18.9	37.6867	37.9467	1798.33	1743.67
57745	57745	Zfp112	0.8	1.03	0.91	0.69	1.03	0.65	1.59	2.06	1.8	1.38	2.06	1.3	47	61	54	39	59	37	0.913333	0.79	1.81667	1.58	54	45
230789	230789	Fam76a	17.49	17.8	16.55	16.5	16.66	16.03	34.79	35.53	32.66	32.98	33.55	32.25	881	898	835	798	821	785	17.28	16.3967	34.3267	32.9267	871.333	801.333
240725	240725	Sulf1	84.12	94.08	91.75	31.02	32.6	31.47	167.28	187.77	181.06	61.99	65.65	63.29	6901	7729	7555	2444	2603	2473	89.9833	31.6967	178.703	63.6433	7395	2506.67
242297	242297	Fam110b	2.09	2	2.2	3.56	3.32	2.59	4.16	3.99	4.34	7.12	6.69	5.2	113	110	117	179	169	129	2.09667	3.15667	4.16333	6.33667	113.333	159
56195	56195	Ptbp2	10.76	9.43	10.52	16.98	18.78	17.58	21.4	18.82	20.75	33.93	37.81	35.37	635	550	616	934	1063	982	10.2367	17.78	20.3233	35.7033	600.333	993
16164	16164	Il13ra1	10.88	15.02	12.74	9.23	9	9.2	21.63	29.99	25.14	18.45	18.11	18.51	683	944	801	556	551	561	12.88	9.14333	25.5867	18.3567	809.333	556
245688	245688	Rbbp7	149.63	132.03	149.04	152.81	154.25	159.79	297.57	263.52	294.1	305.38	310.58	321.41	5452	4811	5449	5350	5494	5657	143.567	155.617	285.063	312.457	5237.33	5500.33
72124	72124	Seh1l	29.73	27.09	28.64	31.7	30.85	33.25	59.11	54.07	56.52	63.34	62.13	66.88	1577	1436	1538	1622	1587	1683	28.4867	31.9333	56.5667	64.1167	1517	1630.67
70392	70392	Asb12	0	0	0	0	0.06	0.06	0	0	0	0	0.11	0.11	0	0	0	0	1	1	0	0.04	0	0.0733333	0	0.666667
272589	272589	Tbcel	11.43	12.1	11.42	9.84	9.72	9.59	22.74	24.15	22.54	19.66	19.57	19.29	982	1042	981	810	815	800	11.65	9.71667	23.1433	19.5067	1001.67	808.333
319875	319875	Tmprss11b	0.03	0.03	0	0.06	0.09	0.03	0.06	0.06	0	0.12	0.17	0.06	1	1	0	2	3	1	0.02	0.06	0.04	0.116667	0.666667	2
223864	223864	Rapgef3	3.29	3.25	2.81	0.89	0.9	1	6.53	6.49	5.54	1.79	1.8	2.01	208	205	173	55	55	61	3.11667	0.93	6.18667	1.86667	195.333	57
239027	239027	Arhgap22	7.5	5.78	8.83	9.14	7.46	7.09	14.92	11.53	17.43	18.26	15.02	14.25	337	256	400	401	343	318	7.37	7.89667	14.6267	15.8433	331	354
219189	219189	Vwa8	9.47	10	10.25	9.63	9.64	10.2	18.83	19.96	20.22	19.25	19.41	20.51	981	1027	957	927	970	1004	9.90667	9.82333	19.67	19.7233	988.333	967
98932	98932	Myl9	658.15	594.01	596.99	377.07	396.11	376.11	1308.83	1185.61	1178.07	753.53	797.57	756.5	9791	8811	8958	5416	5801	5444	616.383	383.097	1224.17	769.2	9186.67	5553.67
381112	381112	Arhgef33	0.16	0.15	0.15	0.15	0.15	0.14	0.32	0.29	0.29	0.3	0.31	0.28	18	16	17	17	19	16	0.153333	0.146667	0.3	0.296667	17	17.3333
15375	15375	Foxa1	0.23	0.19	0.58	0	0.04	0.06	0.45	0.38	1.15	0	0.08	0.12	12	10	31	0	2	3	0.333333	0.0333333	0.66	0.0666667	17.6667	1.66667
320234	320234	Ccdc66	5.63	6.38	5.74	7.41	6.82	6.8	11.2	12.74	11.32	14.82	13.74	13.68	301.82	352.69	313.49	359.61	334.67	340	5.91667	7.01	11.7533	14.08	322.667	344.76
109095	109095	Rbm15b	16.39	14.49	16.48	17.9	20.23	16.99	32.6	28.92	32.52	35.77	40.74	34.17	820	725	826	859	988	825	15.7867	18.3733	31.3467	36.8933	790.333	890.667
15903	15903	Id3	125.48	76.87	167.15	126.11	128.56	129.28	249.53	153.43	329.84	252.01	258.86	260.03	1561	952	2097.92	1516	1576.32	1564	123.167	127.983	244.267	256.967	1536.97	1552.11
237926	237926	Rsad1	2.24	2.29	2.4	2.95	2.5	1.98	4.44	4.58	4.74	5.89	5.04	3.98	157	162	170	198	172	137	2.31	2.47667	4.58667	4.97	163	169
72053	72053	Tmub2	16.47	17.72	15.72	11.41	12.71	11.18	32.75	35.37	31.02	22.8	25.59	22.49	540	612	532	389	428	382	16.6367	11.7667	33.0467	23.6267	561.333	399.667
20526	20526	Slc2a2	0	0	0.02	0	0	0	0	0	0.05	0	0	0	0	0	1	0	0	0	0.00666667	0	0.0166667	0	0.333333	0
83770	83770	Tas1r2	0	0.04	0.06	0	0.02	0.02	0	0.08	0.12	0	0.04	0.04	0	2	3	0	1	1	0.0333333	0.0133333	0.0666667	0.0266667	1.66667	0.666667
74330	74330	Dnajc14	30.63	31.16	29.41	26.24	26.32	26.88	60.91	62.19	58.03	52.44	52.99	54.07	2255.51	2300.99	2214.22	1880.66	1947.24	1989.82	30.4	26.48	60.3767	53.1667	2256.91	1939.24
20491	20491	Sla	0.61	0.71	0.6	0.28	0.26	0.28	1.22	1.41	1.19	0.56	0.52	0.57	32	38	35	15	13	15	0.64	0.273333	1.27333	0.55	35	14.3333
210126	210126	Lpp	60.08	56.16	58.03	53.22	53.53	55.11	119.49	112.1	114.51	106.35	107.79	110.84	16425	15416	15873	14044	14311	14688	58.09	53.9533	115.367	108.327	15904.7	14347.7
53620	53620	Vamp5	5.08	4.87	4.45	3.56	2.79	3.67	10.11	9.73	8.79	7.12	5.62	7.38	127	122	111	86	68	89	4.8	3.34	9.54333	6.70667	120	81
67203	67203	Nde1	35.47	29.81	34.7	35.25	30.3	30.18	70.54	59.51	68.48	70.44	61.02	60.7	1277	1063	1254	1192	1061	1051	33.3267	31.91	66.1767	64.0533	1198	1101.33
12859	12859	Cox5b	217.15	230.75	225.14	217.5	216.45	227.7	431.82	460.57	444.29	434.65	435.82	457.99	1183	1241	1252	1159	1181	1210	224.347	220.55	445.56	442.82	1225.33	1183.33
19739	19739	Rgs9	0.17	0.12	0.06	0.05	0.09	0.15	0.34	0.24	0.12	0.1	0.18	0.31	10	16	8	6	12	15	0.116667	0.0966667	0.233333	0.196667	11.3333	11
69104	69104	2024-03-05	56.48	63.65	58.69	57.46	57.12	57.81	112.32	127.05	115.81	114.83	115.01	116.29	1478	1635	1561	1477	1466	1515.99	59.6067	57.4633	118.393	115.377	1558	1486.33
14714	14714	Gnrh1	0.48	0.84	0.89	0.87	1.04	1.23	0.95	1.68	1.76	1.74	2.09	2.48	8	14	15	14	17	20	0.736667	1.04667	1.46333	2.10333	12.3333	17
218832	218832	Polr3a	9.44	8.71	9	10.46	10.13	10.59	18.77	17.38	17.76	20.91	20.4	21.3	756	689	715	800	794	822	9.05	10.3933	17.97	20.87	720	805.333
15377	15377	Foxa3	0	0	0.03	0	0	0	0	0	0.06	0	0	0	0	0	1	0	0	0	0.01	0	0.02	0	0.333333	0
170765	170765	Ripply3	0.31	0.22	0.04	0.18	0.13	0.13	0.61	0.44	0.09	0.36	0.27	0.27	7	5	1	4	3	3	0.19	0.146667	0.38	0.3	4.33333	3.33333
56409	56409	Nudt3	44.49	43.66	42.59	43.2	44.66	43.41	88.47	87.14	84.04	86.32	89.91	87.32	1541	1512	1480	1437	1512	1460	43.58	43.7567	86.55	87.85	1511	1469.67
56219	56219	Extl1	0.11	0.26	0.1	0.27	0.2	0.21	0.23	0.51	0.2	0.54	0.41	0.41	8	18	7	18	14	14	0.156667	0.226667	0.313333	0.453333	11	15.3333
239652	239652	Zfp641	0.55	0.53	0.38	0.18	0.16	0.13	1.09	1.05	0.76	0.37	0.33	0.26	39	46	29	12	15	12	0.486667	0.156667	0.966667	0.32	38	13
226442	226442	Zfp281	11.02	11.72	12.62	13.21	13.48	13.92	21.91	23.39	24.91	26.41	27.14	28	1004	1069	1151	1154	1197	1231	11.7867	13.5367	23.4033	27.1833	1074.67	1194
71916	71916	Dus4l	4.23	3.86	2.48	4.22	4.85	4.98	8.41	7.7	4.9	8.44	9.76	10.02	97	89	68	109	129	127	3.52333	4.68333	7.00333	9.40667	84.6667	121.667
13437	13437	Dnpep	38.66	37.59	38.3	33.25	32.02	34	76.87	75.03	75.59	66.45	64.47	68.39	998	972	990	822	806	858	38.1833	33.09	75.83	66.4367	986.667	828.667
18742	18742	Pitx3	0.03	0	0.1	0.05	0	0	0.07	0	0.19	0.1	0	0	1	0	2	1	0	0	0.0433333	0.0166667	0.0866667	0.0333333	1	0.333333
329650	329650	Med12l	0.08	0.14	0.09	0.11	0.11	0.1	0.16	0.28	0.18	0.22	0.22	0.2	14.42	25.51	16.77	19.16	18.55	15.14	0.103333	0.106667	0.206667	0.213333	18.9	17.6167
26386	26386	Hsf4	0.87	0.54	0.82	0.54	0.5	0.35	1.74	1.07	1.62	1.09	1	0.7	24	14	21	14	13	9	0.743333	0.463333	1.47667	0.93	19.6667	12
64654	64654	Fgf23	0.02	0.02	0	0	0	0.05	0.04	0.05	0	0	0	0.09	1	1	0	0	0	2	0.0133333	0.0166667	0.03	0.03	0.666667	0.666667
52468	52468	Ctdsp2	63.77	72.83	59.24	55.55	56.18	57.65	126.82	145.37	116.91	111	113.12	115.95	5098	5849	4780	4318	4418	4514	65.28	56.46	129.7	113.357	5242.33	4416.67
23948	23948	Mmp17	1.53	1.54	2.15	1.66	2.03	1.67	3.04	3.07	4.24	3.32	4.1	3.35	117	118	165	122	152	124	1.74	1.78667	3.45	3.59	133.333	132.667
338366	338366	Mia3	25.74	28.27	23.36	25.3	25.01	25.72	51.18	56.42	46.09	50.55	50.36	51.74	3004	3304	2728	2829	2845	2914	25.79	25.3433	51.23	50.8833	3012	2862.67
57320	57320	Park7	128.8	129.36	130.15	130.76	129.67	123.68	256.13	258.2	256.82	261.32	261.09	248.77	1485	1484	1515	1458	1475	1387	129.437	128.037	257.05	257.06	1494.67	1440
71584	71584	Gdpd2	0.15	0.26	0.15	0.08	0.08	0.05	0.3	0.52	0.3	0.16	0.16	0.11	6	11	6	3	3	2	0.186667	0.07	0.373333	0.143333	7.66667	2.66667
71145	71145	Scara5	0.03	0.2	0.23	0.32	0.22	0.18	0.06	0.4	0.46	0.65	0.45	0.36	2	13	15	20	14	11	0.153333	0.24	0.306667	0.486667	10	15
242594	242594	Fyb2	0.57	0.52	0.62	2.31	2.25	1.85	1.14	1.04	1.23	4.61	4.53	3.71	28	26	31	110	109	89	0.57	2.13667	1.13667	4.28333	28.3333	102.667
56496	56496	Tspan6	18.42	18	18.72	23.22	22.39	24.72	36.64	35.92	36.94	46.4	45.08	49.73	501	489	511	607	596	653	18.38	23.4433	36.5	47.07	500.333	618.667
12325	12325	Camk2g	29.26	28.78	32.66	20.66	20.41	20.96	58.19	57.44	64.44	41.29	41.1	42.16	1818	1785	2025	1235	1237	1264	30.2333	20.6767	60.0233	41.5167	1876	1245.33
101565	101565	Ccp110	4.08	4.08	4.25	5.98	5.87	6	8.12	8.14	8.38	11.95	11.81	12.07	343	349	368	485	495	504	4.13667	5.95	8.21333	11.9433	353.333	494.667
230657	230657	Tmem69	6.5	6.45	6.51	7.02	6.81	5.79	12.93	12.87	12.84	14.02	13.7	11.65	187	173.52	187.01	185.47	200	177.48	6.48667	6.54	12.88	13.1233	182.51	187.65
59308	59308	Emcn	0.61	0.23	0.5	0.1	0.15	0.05	1.22	0.46	1	0.19	0.31	0.1	13	5	11	2	3	1	0.446667	0.1	0.893333	0.2	9.66667	2
12812	12812	Coil	5.45	5	5.51	5.7	5.51	5.64	10.84	9.99	10.87	11.4	11.09	11.34	232	213	235	233	229	233	5.32	5.61667	10.5667	11.2767	226.667	231.667
23989	23989	Med24	10.18	9.5	10.64	11.2	11.34	10.96	20.24	18.96	21	22.39	22.84	22.05	582	544	610	615	633	609	10.1067	11.1667	20.0667	22.4267	578.667	619
100044627	100044627	LOC100044627	280.71	288.66	296.4	288.36	322.83	290.79	558.22	576.15	584.9	576.27	650.01	584.9	1044.63	1053.53	1135.79	1059.86	1217.44	1058.67	288.59	300.66	573.09	603.727	1077.98	1111.99
73072	73072	Prr36	0.04	0.12	0.13	0.03	0.05	0.07	0.08	0.24	0.26	0.06	0.11	0.14	3	9	10	2	4	5	0.0966667	0.05	0.193333	0.103333	7.33333	3.66667
223739	223739	5031439G07Rik	21.91	18.22	21.2	22.04	22.01	21.61	43.56	36.36	41.84	44.05	44.31	43.46	2612	2175	2530	2518	2557	2500	20.4433	21.8867	40.5867	43.94	2439	2525
23879	23879	Fxr2	45.95	39.92	43.81	39.9	38.9	38.85	91.38	79.68	86.45	79.74	78.34	78.15	2260	1964	2159	1883	1868	1855	43.2267	39.2167	85.8367	78.7433	2127.67	1868.67
76905	76905	Lrg1	0	0	0.1	0	0	0	0	0	0.2	0	0	0	0	0	2	0	0	0	0.0333333	0	0.0666667	0	0.666667	0
109880	109880	Braf	6.2	6.83	5.77	5.4	5.62	5.25	12.33	13.63	11.39	10.79	11.31	10.57	1082	1192	1007	903	949	889	6.26667	5.42333	12.45	10.89	1093.67	913.667
66259	66259	Camk2n1	1.2	2.03	1.28	1.32	1.2	1.35	2.38	4.06	2.52	2.63	2.41	2.72	73	124	78	77	71	80	1.50333	1.29	2.98667	2.58667	91.6667	76
107528	107528	Magee1	11.26	10.66	11.64	8.46	7.52	8.57	22.4	21.28	22.98	16.91	15.14	17.23	680	644	704	490	443	502	11.1867	8.18333	22.22	16.4267	676	478.333
116905	116905	Dph1	7.34	8.1	6.85	8.28	8.05	9.17	14.6	16.17	13.52	16.56	16.21	18.45	245.21	270.38	229.43	265.7	262.75	297.41	7.43	8.5	14.7633	17.0733	248.34	275.287
69553	69553	Ripor3	0.96	1.73	0.94	1.01	0.86	1	1.9	3.45	1.86	2.01	1.74	2.01	58	122	60	60	54	61	1.21	0.956667	2.40333	1.92	80	58.3333
70979	70979	Fancd2os	0	0	0	0.06	0	0	0	0	0	0.12	0	0	0	0	0	1.06	0	0	0	0.02	0	0.04	0	0.353333
433182	433182	Eno1b	0	0	0.12	0.14	0	0.23	0	0	0.25	0.28	0	0.47	0	0	3.38	3.69	0	6.09	0.04	0.123333	0.0833333	0.25	1.12667	3.26
58521	58521	Eid1	38.89	45.22	40.03	33.65	35.34	33.82	77.34	90.25	78.99	67.25	71.16	68.02	1611	1873	1662	1338	1430	1360	41.38	34.27	82.1933	68.81	1715.33	1376
27226	27226	Pla2g7	37.35	46.51	55.58	23.55	23.26	25.35	74.28	92.82	109.67	47.07	46.83	51	1126	1396	1678	674	677	736	46.48	24.0533	92.2567	48.3	1400	695.667
234373	234373	Sugp2	7.04	7.1	7.69	7.47	7.77	6.8	14	14.17	15.18	14.92	15.65	13.67	492.4	501.19	542.9	500.43	534.02	464.9	7.27667	7.34667	14.45	14.7467	512.163	499.783
94178	94178	Mcoln1	22.49	23.65	22.86	22.65	22.74	21.53	44.73	47.2	45.11	45.27	45.78	43.31	710	746	724	687	702	660	23	22.3067	45.68	44.7867	726.667	683
319480	319480	Itga11	29.7	38.25	29.2	10.74	9.57	10.39	59.07	76.34	57.63	21.46	19.26	20.89	2525	3255	2485	875	793	857	32.3833	10.2333	64.3467	20.5367	2755	841.667
241589	241589	D430041D05Rik	0	0	0.01	0	0	0.01	0	0	0.02	0	0	0.02	0	0	1	0	0	1	0.00333333	0.00333333	0.00666667	0.00666667	0.333333	0.333333
18996	18996	Pou4f1	0.02	0.01	0.02	0.01	0.01	0	0.03	0.02	0.03	0.02	0.02	0	1	1	1	1	1	0	0.0166667	0.00666667	0.0266667	0.0133333	1	0.666667
102638882	102638882	Gm35339	0.09	0.18	0.17	0.03	0.03	0.05	0.18	0.35	0.34	0.05	0.05	0.11	7	15	13	2	2	5	0.146667	0.0366667	0.29	0.07	11.6667	3
106581	106581	Fam234a	26.56	28.74	27.43	18.49	19.28	18.99	52.81	57.37	54.13	36.95	38.81	38.2	1232	1331	1271	820	871	853	27.5767	18.92	54.77	37.9867	1278	848
53951	53951	Gpatch11	4.58	4.58	4.98	4.04	4.02	3.77	9.1	9.14	9.82	8.07	8.1	7.59	330	332	359	279	282	263	4.71333	3.94333	9.35333	7.92	340.333	274.667
27366	27366	Txnl4a	128.41	125.44	130.22	140.88	147.23	131.29	255.37	250.37	256.97	281.53	296.45	264.08	3012	2847.74	3027	3085.11	3203	2949.03	128.023	139.8	254.237	280.687	2962.25	3079.05
19659	19659	Rbp1	5.45	6.43	6.2	13.22	12.28	12.81	10.83	12.82	12.24	26.42	24.72	25.76	234	276	267	545	515	534	6.02667	12.77	11.9633	25.6333	259	531.333
234728	234728	Cmtr2	4.18	3.82	3.94	5.12	4.54	4.29	8.32	7.62	7.78	10.24	9.15	8.63	253	230	238	297	267	252	3.98	4.65	7.90667	9.34	240.333	272
231086	231086	Hadhb	37.03	36.77	40.11	35.47	32.85	35.47	73.63	73.39	79.15	70.88	66.14	71.35	1191	1181	1293	1097	1035	1108	37.97	34.5967	75.39	69.4567	1221.67	1080
442829	442829	Ccin	0.16	0.09	0.12	0.06	0.13	0.03	0.31	0.19	0.25	0.13	0.26	0.06	5	3	4	2	4	1	0.123333	0.0733333	0.25	0.15	4	2.33333
68558	68558	Ankra2	10.09	10.37	9.18	7.96	8.22	8.27	20.06	20.69	18.12	15.91	16.56	16.63	339	349	311	255	270	259	9.88	8.15	19.6233	16.3667	333	261.333
67072	67072	Cdc37l1	12.49	13.19	12.3	10.71	10.85	10.69	24.84	26.33	24.26	21.41	21.85	21.51	999.86	1067.95	1001.82	828.82	858.82	839.82	12.66	10.75	25.1433	21.59	1023.21	842.487
73430	73430	Zfp974	1.17	1.42	1.48	0.55	0.79	0.62	2.32	2.83	2.92	1.1	1.6	1.25	135.83	160	164.59	69.57	84.41	69.09	1.35667	0.653333	2.69	1.31667	153.473	74.3567
213539	213539	Bag2	62.58	54.03	61.63	61.03	64.24	64.29	124.44	107.84	121.62	121.97	129.34	129.3	1761	1519	1741	1651	1769	1757	59.4133	63.1867	117.967	126.87	1673.67	1725.67
330361	330361	Gcfc2	4.73	4.96	5.36	4.98	4.93	4.71	9.4	9.89	10.57	9.95	9.94	9.47	223.6	235.24	254.98	209.41	230.61	207.56	5.01667	4.87333	9.95333	9.78667	237.94	215.86
18671	18671	Abcb1a	1.51	1.03	1.67	0.33	0.35	0.35	3.01	2.07	3.29	0.66	0.7	0.71	134.56	92.58	149.2	28.21	30.32	30.5	1.40333	0.343333	2.79	0.69	125.447	29.6767
12532	12532	Cdc25c	4.34	4.56	5.36	5.52	5.94	5.84	8.63	9.11	10.58	11.03	11.96	11.74	131	132	155	148	170	172	4.75333	5.76667	9.44	11.5767	139.333	163.333
140858	140858	Wdr5	25.16	22.79	24.52	30.7	30.08	30.51	50.03	45.48	48.38	61.34	60.57	61.37	1207	1092	1177	1411	1407	1419	24.1567	30.43	47.9633	61.0933	1158.67	1412.33
26450	26450	Rbbp9	11.91	12.52	10.74	8.83	9.6	9.21	23.68	25	21.2	17.65	19.32	18.53	410	431	371	292	323	308	11.7233	9.21333	23.2933	18.5	404	307.667
140629	140629	Ubox5	3.24	3.62	2.83	3.17	3.64	3.15	6.45	7.23	5.59	6.33	7.32	6.34	209.21	233.23	182.17	194.48	228.84	195.31	3.23	3.32	6.42333	6.66333	208.203	206.21
80888	80888	Hspb8	35.37	35.54	32.97	25.71	23.84	23.18	70.33	70.94	65.07	51.38	48	46.63	996	1000	932	696	657	634	34.6267	24.2433	68.78	48.67	976	662.333
69674	69674	Mif4gd	9.04	10.76	8.77	8.56	9.09	9.23	17.97	21.48	17.31	17.11	18.3	18.56	188	221	186	173	185	187	9.52333	8.96	18.92	17.99	198.333	181.667
257926	257926	Olfr544	0	0	0.06	0.13	0.07	0	0	0	0.12	0.25	0.15	0	0	0	1	2	1.2	0	0.02	0.0666667	0.04	0.133333	0.333333	1.06667
13041	13041	Ctsw	0.28	0.38	0.33	1.01	1.25	1.41	0.56	0.75	0.65	2.03	2.51	2.84	6	8	7	16	26	23	0.33	1.22333	0.653333	2.46	7	21.6667
72508	72508	Rps6kb1	33.93	33.82	34.66	34.01	31.13	32.84	67.47	67.5	68.39	67.96	62.67	66.06	1539	1575	1488	1375	1387	1491	34.1367	32.66	67.7867	65.5633	1534	1417.67
331532	331532	Tceal5	0.79	1.02	1.04	0.56	0.51	0.4	1.58	2.03	2.06	1.13	1.03	0.81	11.29	14.45	14.99	7.76	7.18	5.55	0.95	0.49	1.89	0.99	13.5767	6.83
16332	16332	Inppl1	41.27	36.52	39.11	33.49	32.79	33.53	82.07	72.89	77.18	66.94	66.02	67.44	3348	2970	3170	2597	2586	2633	38.9667	33.27	77.38	66.8	3162.67	2605.33
114741	114741	Supt16	35.41	32.96	35.64	46.24	45.85	47.05	70.42	65.8	70.34	92.41	92.32	94.64	2722.77	2537.01	2743.72	3408.54	3437.7	3511.23	34.67	46.38	68.8533	93.1233	2667.83	3452.49
12488	12488	Cd2ap	16.94	17.07	16.02	13.63	13.85	14.61	33.7	34.06	31.62	27.24	27.89	29.38	1579	1499	1484	1219	1258	1321	16.6767	14.03	33.1267	28.17	1520.67	1266
319211	319211	Nol4	0.38	0.28	0.25	0.31	0.17	0.22	0.75	0.56	0.49	0.63	0.35	0.44	32	24	22	27	15	18	0.303333	0.233333	0.6	0.473333	26	20
170720	170720	Card14	0.03	0.07	0.03	0.02	0	0	0.07	0.14	0.06	0.05	0	0	2.51	4.92	2.42	1.27	0	0	0.0433333	0.00666667	0.09	0.0166667	3.28333	0.423333
67511	67511	Tmed9	155.56	164.25	156.22	138.37	134.14	132.4	309.36	327.83	308.28	276.51	270.09	266.3	3355	3536	3386	2872	2836	2774	158.677	134.97	315.157	270.967	3425.67	2827.33
192166	192166	Sardh	3	4.39	3.32	2.53	2.68	2.17	5.97	8.76	6.56	5.06	5.39	4.37	231	333	260	186	204	164	3.57	2.46	7.09667	4.94	274.667	184.667
68810	68810	Nexn	36.67	38.87	33.38	34.36	32.92	37.39	72.93	77.58	65.88	68.67	66.29	75.2	1644	1749	1517	1481	1457	1633	36.3067	34.89	72.13	70.0533	1636.67	1523.67
16656	16656	Hivep3	0.85	0.71	0.88	1.85	1.62	1.84	1.68	1.41	1.74	3.69	3.25	3.7	165	140	183	363	327	370	0.813333	1.77	1.61	3.54667	162.667	353.333
19325	19325	Rab10	55.9	54.37	53.59	56.64	56.92	58.7	111.16	108.53	105.76	113.19	114.61	118.07	3302	3214	3171	3209	3281	3366	54.62	57.42	108.483	115.29	3229	3285.33
56361	56361	Pus1	24.64	22.26	23.42	29.36	28.41	28.67	49.01	44.42	46.22	58.68	57.21	57.67	629	564	596	719	685	685	23.44	28.8133	46.55	57.8533	596.333	696.333
229285	229285	Spg20	20.54	22.23	21.3	20.87	21.09	22.31	40.85	44.36	42.04	41.72	42.46	44.87	1305	1411	1354	1270	1304	1372	21.3567	21.4233	42.4167	43.0167	1356.67	1315.33
76261	76261	0610040J01Rik	0.03	0.03	0.03	0.07	0	0.07	0.07	0.07	0.07	0.14	0	0.14	1	1	1	3	0	2	0.03	0.0466667	0.07	0.0933333	1	1.66667
18432	18432	Mybbp1a	92	78.94	90.6	114.36	114.3	111.8	182.95	157.56	178.78	228.54	230.14	224.88	6901	5927	6804	8224	8361	8140	87.18	113.487	173.097	227.853	6544	8241.67
14763	14763	Gpr37	0.02	0.04	0.02	0	0	0	0.04	0.07	0.04	0	0	0	1	2	1	0	0	0	0.0266667	0	0.05	0	1.33333	0
102633458	102633458	Gm11100	0	0.07	0	0	0.1	0.03	0	0.13	0	0	0.2	0.07	0	2.04	0	0	3.06	1.02	0.0233333	0.0433333	0.0433333	0.09	0.68	1.36
21844	21844	Tiam1	3.25	3.41	3.54	4.3	4.05	4.38	6.45	6.8	6.98	8.6	8.15	8.81	414	428	450	530	501	545	3.4	4.24333	6.74333	8.52	430.667	525.333
78038	78038	Mccc2	7.17	7.38	6.94	9.74	9.18	8.2	14.25	14.72	13.69	19.47	18.48	16.5	242	249	235	316	303	269	7.16333	9.04	14.22	18.15	242	296
67847	67847	Sncaip	0.22	0.47	0.35	0.16	0.19	0.12	0.44	0.93	0.69	0.31	0.38	0.25	14	28	22	9	11	7	0.346667	0.156667	0.686667	0.313333	21.3333	9
238247	238247	Arid4a	5.36	5.25	5.18	3.42	3.6	4.03	10.66	10.47	10.21	6.83	7.25	8.1	522	510	507	321	337	381	5.26333	3.68333	10.4467	7.39333	513	346.333
100155	100155	Shoc1	0.03	0.02	0.03	0.01	0.01	0.01	0.05	0.04	0.05	0.02	0.02	0.02	3	2	3	1	1	1	0.0266667	0.01	0.0466667	0.02	2.66667	1
66367	66367	2310022A10Rik	7.48	7.54	8.02	6.93	6.48	7.02	14.87	15.04	15.82	13.84	13.04	14.11	325	312	334	289	264	287	7.68	6.81	15.2433	13.6633	323.667	280
103080	103080	2024-09-10	19.75	16.37	21.03	23.62	21.98	23.58	39.28	32.68	41.5	47.21	44.26	47.43	671	562	670	708	723	756	19.05	23.06	37.82	46.3	634.333	729
16492	16492	Kcna4	0.11	0.19	0.19	0.05	0.06	0.09	0.22	0.38	0.38	0.1	0.12	0.17	12	16	18	6	7	7	0.163333	0.0666667	0.326667	0.13	15.3333	6.66667
67996	67996	Srsf6	53.21	48.74	55.46	81.31	84.42	81.53	105.81	97.27	109.45	162.49	169.99	163.99	3176	2911	3316	4655	4917	4724	52.47	82.42	104.177	165.49	3134.33	4765.33
18744	18744	Pja1	27.43	27.65	27.16	25.25	25.3	26.79	54.56	55.19	53.6	50.45	50.94	53.89	1183	1176	1173	1041	1052	1102	27.4133	25.78	54.45	51.76	1177.33	1065
11839	11839	Areg	0.64	0.58	1.1	3.26	3.02	2.21	1.27	1.16	2.16	6.5	6.07	4.45	11	10	19	54	51	37	0.773333	2.83	1.53	5.67333	13.3333	47.3333
18950	18950	Pnp	26.75	26.46	29.29	25.93	25.57	24.15	53.19	52.82	57.8	51.82	51.49	48.58	1301.43	1288	1428.05	1210.58	1214.68	1140.74	27.5	25.2167	54.6033	50.63	1339.16	1188.67
66126	66126	Elof1	57.47	48.83	56.6	58.08	57.03	57.39	114.29	97.47	111.69	116.06	114.82	115.43	704	608	699	692	695	692	54.3	57.5	107.817	115.437	670.333	693
107272	107272	Psat1	222.23	221.36	195.35	300.44	294.29	302.29	441.93	441.82	385.49	600.4	592.57	608.03	7701	7671	6791	10000	9972	10173	212.98	299.007	423.08	600.333	7387.67	10048.3
21854	21854	Timm17a	134.44	114.56	138.6	144.47	141.61	145.25	267.35	228.66	273.5	288.72	285.13	292.16	1586	1344	1650	1647	1648	1667	129.2	143.777	256.503	288.67	1526.67	1654
239122	239122	Setdb2	3.15	3.25	3.43	5.07	4.09	4.35	6.26	6.49	6.76	10.14	8.24	8.74	156.03	161.14	170.24	241	198.12	209.08	3.27667	4.50333	6.50333	9.04	162.47	216.067
100502841	100502841	Epg5	6.04	7.37	5.09	5.77	5.81	6.03	12.02	14.72	10.05	11.53	11.69	12.13	1058	1294	924	1049	1012	1081	6.16667	5.87	12.2633	11.7833	1092	1047.33
50918	50918	Myadm	262.64	241.4	251.98	274.46	267.04	269.42	522.29	481.82	497.24	548.47	537.68	541.91	12463	11481	11975	12473	12378	12386	252.007	270.307	500.45	542.687	11973	12412.3
76108	76108	Rap2a	18.08	17.49	21.36	15.03	15.07	14.97	35.96	34.91	42.15	30.04	30.34	30.1	1286	1245	1521	1025	1045	1033	18.9767	15.0233	37.6733	30.16	1350.67	1034.33
56443	56443	Arpc1a	56.69	56.02	58.68	62.27	66.89	62.13	112.74	111.81	115.79	124.44	134.68	124.98	1361	1343	1415	1438	1573	1449	57.13	63.7633	113.447	128.033	1373	1486.67
235459	235459	Gtf2a2	34.29	29.95	36.69	40.77	38.14	37.2	68.19	59.77	72.4	81.48	76.79	74.83	454	399	484	529	507	492	33.6433	38.7033	66.7867	77.7	445.667	509.333
94212	94212	Pag1	1.07	1.12	1.28	1.46	1.27	1.36	2.14	2.24	2.52	2.92	2.55	2.74	159.87	164.82	195.96	211.2	184.84	205.83	1.15667	1.36333	2.3	2.73667	173.55	200.623
231717	231717	Pheta1	5.4	5.16	4.99	4.36	4.21	4.32	10.74	10.31	9.85	8.7	8.48	8.68	206	195	190	159	157	160	5.18333	4.29667	10.3	8.62	197	158.667
12055	12055	Bcl7c	30.9	27.24	31.01	37.57	37.63	31.77	61.44	54.36	61.2	75.08	75.76	63.9	541	496	550	588	594	538	29.7167	35.6567	59	71.58	529	573.333
192976	192976	Lrrc75a	7.44	7.75	5.73	7.37	7.89	7.74	14.79	15.47	11.31	14.72	15.9	15.57	228.8	232.51	165.94	221.01	241.07	222.6	6.97333	7.66667	13.8567	15.3967	209.083	228.227
54561	54561	Nap1l3	0.56	0.37	0.45	0.31	0.09	0.27	1.11	0.73	0.89	0.63	0.18	0.53	26	17	21	14	4	12	0.46	0.223333	0.91	0.446667	21.3333	10
94232	94232	Ubqln4	25.27	23.16	24.41	21.82	22.31	21.83	50.26	46.22	48.17	43.61	44.93	43.91	1427	1309	1379	1183	1227	1196	24.28	21.9867	48.2167	44.15	1371.67	1202
224727	224727	Bag6	70.53	67.42	69.76	76.35	72.59	72.93	140.27	134.56	137.66	152.57	146.15	146.69	4519	4332	4486	4704	4544	4561	69.2367	73.9567	137.497	148.47	4445.67	4603
71583	71583	9130008F23Rik	3.84	3.31	4.09	5.36	5.68	5.33	7.63	6.62	8.06	10.7	11.43	10.72	132	114	141	177	191	178	3.74667	5.45667	7.43667	10.95	129	182
330577	330577	Saxo2	0.07	0.18	0.05	0.1	0.14	0.07	0.13	0.37	0.11	0.2	0.28	0.14	4	8	2	3	7	4	0.1	0.103333	0.203333	0.206667	4.66667	4.66667
102636256	102636256	Gm33373	0.34	0.49	0.45	0.39	0.38	0.38	0.67	0.97	0.88	0.77	0.76	0.77	34.45	49.61	45.46	37.54	37.48	37.9	0.426667	0.383333	0.84	0.766667	43.1733	37.64
269878	269878	Megf8	14.88	17.24	15.3	10.42	10.33	10.45	29.6	34.41	30.2	20.82	20.8	21.02	2649	3073	2724	1776	1791	1805	15.8067	10.4	31.4033	20.88	2815.33	1790.67
52679	52679	E2f7	3.21	2.4	3.91	7.88	7.7	8.27	6.39	4.79	7.72	15.75	15.51	16.63	307	229	373	720	716	765	3.17333	7.95	6.3	15.9633	303	733.667
102639653	102639653	Gm2007	0.4	0.06	0	1.02	0.21	0.33	0.81	0.13	0	2.03	0.42	0.67	37.08	5.73	0	88.59	18.61	30.2	0.153333	0.52	0.313333	1.04	14.27	45.8
24070	24070	Mpdu1	16.97	16.87	17.19	22.21	22.66	21.57	33.75	33.66	33.91	44.39	45.63	43.38	327	324	334	412	428	404	17.01	22.1467	33.7733	44.4667	328.333	414.667
115485924	115485924	LOC115485924	0	0	0	0.09	0.13	0.09	0	0	0	0.18	0.27	0.18	0	0	0	2	3	2	0	0.103333	0	0.21	0	2.33333
233058	233058	Zfp420	1.77	1.77	1.62	1.32	1.31	1.01	3.51	3.53	3.2	2.63	2.63	2.04	99	99	90	70	69	56	1.72	1.21333	3.41333	2.43333	96	65
69564	69564	Nmrk2	0	0	0.03	0	0	0	0	0	0.07	0	0	0	0	0	1	0	0	0	0.01	0	0.0233333	0	0.333333	0
56787	56787	Ascl3	0.13	0.13	0	0.13	0	0	0.25	0.25	0	0.26	0	0	1	1	0	1	0	0	0.0866667	0.0433333	0.166667	0.0866667	0.666667	0.333333
329504	329504	Lcmt2	2.3	3.08	2.62	2.45	2.51	2.02	4.57	6.15	5.17	4.9	5.06	4.06	131.45	176.17	149.82	134.31	140.22	112.1	2.66667	2.32667	5.29667	4.67333	152.48	128.877
20684	20684	Sp100	0.9	1.33	1.18	0.35	0.52	0.38	1.79	2.66	2.33	0.69	1.05	0.76	33	43	43	14	21	15	1.13667	0.416667	2.26	0.833333	39.6667	16.6667
432763	432763	Prr7	1.65	2.67	2.58	4.04	3.17	3.09	3.29	5.33	5.08	8.07	6.38	6.21	64	76	68	157	122	120	2.3	3.43333	4.56667	6.88667	69.3333	133
72658	72658	2700097O09Rik	2.3	3.25	2.26	2.52	2.29	2.66	4.58	6.49	4.46	5.04	4.6	5.35	35	48	34	36	33	38	2.60333	2.49	5.17667	4.99667	39	35.6667
15166	15166	Hcn2	0.86	0.56	0.58	0.9	0.75	0.66	1.72	1.12	1.15	1.8	1.51	1.32	46	30	31	46	39	34	0.666667	0.77	1.33	1.54333	35.6667	39.6667
209630	209630	Frmd4a	29.19	26.4	28.83	31.01	30.41	30.3	58.05	52.7	56.9	61.98	61.22	60.95	3176	2895.95	3138	3226.04	3234.05	3197.08	28.14	30.5733	55.8833	61.3833	3069.98	3219.06
243634	243634	Ano2	0.02	0	0	0	0	0	0.03	0	0	0	0	0	1	0	0	0	0	0	0.00666667	0	0.01	0	0.333333	0
19899	19899	Rpl18	954.55	934.8	971.6	1095.62	1102.14	1093.97	1898.26	1865.82	1917.3	2189.49	2219.18	2200.41	7144	6939	7383	7977	8209	7984	953.65	1097.24	1893.79	2203.03	7155.33	8056.67
73181	73181	Nfatc4	22.99	28.67	21.18	15.27	14.64	15.18	45.73	57.22	41.8	30.52	29.48	30.52	1463	1857	1351	927	911	945	24.28	15.03	48.25	30.1733	1557	927.667
22701	22701	Zfp41	1.62	1.95	1.58	1.08	1.26	1.43	3.22	3.9	3.11	2.15	2.53	2.88	111	136	113	65	83	94	1.71667	1.25667	3.41	2.52	120	80.6667
625249	625249	Gpx4	350.28	329.87	350.64	279.1	293.8	287.82	696.58	658.4	691.93	557.74	591.58	578.93	3387	3175	3431	2634	2830	2711	343.597	286.907	682.303	576.083	3331	2725
12367	12367	Casp3	16.17	16.97	17.18	16.34	16.88	16.56	32.16	33.88	33.91	32.66	33.98	33.31	685	720	733	666	700	681	16.7733	16.5933	33.3167	33.3167	712.667	682.333
27375	27375	Tjp3	0.08	0	0.16	0	0	0	0.16	0	0.32	0	0	0	4	0	8	0	0	0	0.08	0	0.16	0	4	0
53313	53313	Atp2a3	0.47	0.83	0.66	0.05	0.13	0.07	0.92	1.67	1.3	0.11	0.27	0.13	36	65	52	4	10	5	0.653333	0.0833333	1.29667	0.17	51	6.33333
385658	385658	Nxpe3	1.25	1.28	1.08	0.76	0.66	0.78	2.49	2.55	2.13	1.51	1.33	1.56	95	82	81	55	43	51	1.20333	0.733333	2.39	1.46667	86	49.6667
18383	18383	Tnfrsf11b	19.61	30.87	20.42	9.18	8.83	8.94	38.99	61.61	40.31	18.35	17.77	17.99	910	1433	950	409	400	403	23.6333	8.98333	46.97	18.0367	1097.67	404
233246	233246	Ano5	0.02	0.12	0.06	0	0	0	0.04	0.24	0.12	0	0	0	3	16	8	0	0	0	0.0666667	0	0.133333	0	9	0
13435	13435	Dnmt3a	5.19	5.64	5.2	2.55	2.59	2.57	10.31	11.26	10.27	5.09	5.22	5.18	900	992	906.01	429.95	453	445	5.34333	2.57	10.6133	5.16333	932.67	442.65
70248	70248	Dazap1	40.84	36.86	42.22	56.82	56.66	58.98	81.22	73.57	83.32	113.54	114.09	118.62	1336	1206	1388	1790	1817	1881	39.9733	57.4867	79.37	115.417	1310	1829.33
100182	100182	Akna	3.48	5.25	2.81	4.72	4.77	4.06	6.92	10.48	5.55	9.43	9.61	8.16	343	512	277	438	452	387	3.84667	4.51667	7.65	9.06667	377.333	425.667
53886	53886	Cdkl2	2.54	2.71	2.76	1.16	1.48	1.3	5.06	5.41	5.45	2.32	2.98	2.61	176	176	187	74	92	86	2.67	1.31333	5.30667	2.63667	179.667	84
70044	70044	Tut1	12.02	11.93	11.84	10.58	11.82	10.96	23.91	23.81	23.37	21.15	23.79	22.04	547	543	540	462	525	484	11.93	11.12	23.6967	22.3267	543.333	490.333
330914	330914	Arhgap32	1.64	1.86	1.88	2.64	2.54	2.62	3.27	3.71	3.7	5.27	5.11	5.27	286	332	340	448	443	453	1.79333	2.6	3.56	5.21667	319.333	448
66046	66046	Ndufb5	40.28	42.55	44.59	43.74	44.07	40.48	80.1	84.92	88	87.42	88.73	81.41	529	549	586	558	569	518	42.4733	42.7633	84.34	85.8533	554.667	548.333
234542	234542	Rtbdn	0.2	0.31	0.46	0.37	0.31	0.16	0.4	0.61	0.9	0.74	0.63	0.32	4	6	9	7	6	3	0.323333	0.28	0.636667	0.563333	6.33333	5.33333
21898	21898	Tlr4	4.45	4.69	5.27	2.65	2.53	2.81	8.85	9.36	10.4	5.29	5.09	5.66	618	652	732	352	342	379	4.80333	2.66333	9.53667	5.34667	667.333	357.667
13642	13642	Efnb2	22.07	20.29	21.17	28.14	27.27	29.22	43.89	40.51	41.77	56.23	54.91	58.77	1822	1681	1753	2228	2199	2350	21.1767	28.21	42.0567	56.6367	1752	2259
69534	69534	Avpi1	30.72	24.76	31.84	28.66	31.57	27.11	61.08	49.42	62.84	57.27	63.57	54.53	395	317	413	356	400	339	29.1067	29.1133	57.78	58.4567	375	365
54353	54353	Skap2	30.04	34.81	34.34	17.18	16.75	17.63	59.73	69.48	67.77	34.33	33.72	35.46	749	867	860	412	409	427	33.0633	17.1867	65.66	34.5033	825.333	416
66196	66196	Myo19	8.64	9.75	9.85	10.88	10.14	9.57	17.18	19.47	19.44	21.75	20.43	19.26	541.09	498	558.13	630.26	635.51	589.51	9.41333	10.1967	18.6967	20.48	532.407	618.427
56737	56737	Alg2	14.8	14.9	13.89	11.47	11.09	11.25	29.44	29.73	27.41	22.93	22.32	22.63	751	755	706	558	549	554	14.53	11.27	28.86	22.6267	737.333	553.667
381157	381157	Greb1l	0.44	0.34	0.48	0.41	0.42	0.43	0.88	0.67	0.95	0.82	0.85	0.86	67	52	72	59	62	62	0.42	0.42	0.833333	0.843333	63.6667	61
75608	75608	Chmp4b	135.65	135.29	135.83	130.86	128.88	129.7	269.75	270.04	268.04	261.51	259.5	260.88	3301	3288	3320	3063	3072	3066	135.59	129.813	269.277	260.63	3303	3067
235086	235086	Igsf9b	1.98	2.07	1.88	0.7	0.75	0.73	3.94	4.13	3.71	1.39	1.51	1.47	547	577	500	191	205	190	1.97667	0.726667	3.92667	1.45667	541.333	195.333
170762	170762	Nup155	11.79	10.86	11.99	17.94	17.74	17.45	23.44	21.68	23.67	35.86	35.73	35.1	1317	1215	1341	1921	1932	1892	11.5467	17.71	22.93	35.5633	1291	1915
20384	20384	Srsf5	144.54	166.06	166.58	332.65	332.94	337.07	287.44	331.44	328.72	664.77	670.39	677.98	3371	3879	3900	7429	7583	7606	159.06	334.22	315.867	671.047	3716.67	7539.33
272347	272347	Zfp398	2.01	2.02	1.77	1.69	2.26	2.17	3.99	4.03	3.5	3.38	4.55	4.37	232	242.27	222	228	252	272	1.93333	2.04	3.84	4.1	232.09	250.667
66203	66203	Lce1m	0	0	0.09	0	0.09	0	0	0	0.18	0	0.19	0	0	0	1	0	1	0	0.03	0.03	0.06	0.0633333	0.333333	0.333333
242557	242557	Atg4c	4.88	5.47	4.51	4.56	4.82	4.45	9.71	10.92	8.9	9.12	9.71	8.94	246	283	226	222	237	215	4.95333	4.61	9.84333	9.25667	251.667	224.667
227700	227700	Sh3glb2	17.62	16.62	17.88	16.84	15.2	15.79	35.04	33.16	35.29	33.66	30.61	31.75	510	485	521	464	426	439	17.3733	15.9433	34.4967	32.0067	505.333	443
69186	69186	Tmem256	95.03	88.44	93.36	79.4	79.95	82.91	188.98	176.51	184.23	158.67	160.98	166.77	284	258	289	236	244	243	92.2767	80.7533	183.24	162.14	277	241
353282	353282	Sfmbt2	1.27	1.41	1.32	1.34	1.3	1.18	2.53	2.82	2.6	2.67	2.62	2.37	166	177	168	162	149	141	1.33333	1.27333	2.65	2.55333	170.333	150.667
67109	67109	Zfp787	5.76	6.89	6.87	7.03	5.98	6.38	11.46	13.74	13.55	14.04	12.04	12.83	177	213	212	207	181	193	6.50667	6.46333	12.9167	12.97	200.667	193.667
67656	67656	4930548H24Rik	0.09	0	0.09	0.05	0.15	0.1	0.19	0	0.19	0.1	0.29	0.2	2	0	2	1	3	2	0.06	0.1	0.126667	0.196667	1.33333	2
227333	227333	Dgkd	9.36	11.63	10.31	11.83	11.98	11.72	18.61	23.2	20.35	23.64	24.12	23.57	915	1140	1018	1124	1154	1116	10.4333	11.8433	20.72	23.7767	1024.33	1131.33
235610	235610	Atrip	5.72	5.37	6.64	5.32	5.71	4.81	11.38	10.71	13.1	10.63	11.5	9.68	240	225	279	214	234	196	5.91	5.28	11.73	10.6033	248	214.667
14275	14275	Folr1	1.94	1.49	2.1	0.26	0.39	0.69	3.87	2.98	4.14	0.52	0.79	1.39	26	23	26	5	7	9	1.84333	0.446667	3.66333	0.9	25	7
338365	338365	Slc41a2	9.67	9.91	9.38	7.52	8.4	8.07	19.23	19.78	18.5	15.04	16.91	16.23	775	802	742	583	667	626	9.65333	7.99667	19.17	16.06	773	625.333
68942	68942	Chmp2b	56.14	51.75	54.47	45.22	45.59	46.29	111.63	103.29	107.49	90.37	91.8	93.1	1674.88	1542.89	1630.96	1296.65	1330.88	1341.21	54.12	45.7	107.47	91.7567	1616.24	1322.91
108978	108978	4930555G01Rik	0.03	0	0.03	0.1	0.1	0.09	0.06	0	0.05	0.19	0.19	0.18	1	0	0.91	3	3.1	2.79	0.02	0.0966667	0.0366667	0.186667	0.636667	2.96333
276950	276950	Slfn8	0.43	0.57	0.69	0.27	0.38	0.5	0.86	1.14	1.37	0.53	0.77	1.01	29	39	46	17	25	28	0.563333	0.383333	1.12333	0.77	38	23.3333
50755	50755	Fbh1	21.56	25.29	21.08	20.09	19.71	18.48	42.88	50.48	41.61	40.15	39.68	37.18	1321.89	1525.68	1306.97	1178.28	1172.25	1099.55	22.6433	19.4267	44.99	39.0033	1384.85	1150.03
17309	17309	Mgat3	3.71	4.28	3.16	4.43	4.03	3.8	7.38	8.53	6.24	8.86	8.12	7.64	302	344	253	339	318	299	3.71667	4.08667	7.38333	8.20667	299.667	318.667
66734	66734	Map1lc3a	45.48	49.42	42.67	37.14	37.14	31.04	90.44	98.64	84.2	74.21	74.79	62.44	642	695	607	506	516	426	45.8567	35.1067	91.0933	70.48	648	482.667
27047	27047	Omd	0.21	0.37	0.13	0.18	0.21	0.18	0.41	0.74	0.25	0.36	0.43	0.36	6	11	4.06	5	6	5	0.236667	0.19	0.466667	0.383333	7.02	5.33333
209361	209361	Taf3	3.51	3.68	3.45	4.21	4.85	4.53	6.98	7.34	6.8	8.4	9.77	9.11	290	304	285	333	391	363	3.54667	4.53	7.04	9.09333	293	362.333
547097	547097	B020011L13Rik	0.09	0	0	0.09	0.23	0.12	0.18	0	0	0.19	0.46	0.23	4	0	0	4	10	5	0.03	0.146667	0.06	0.293333	1.33333	6.33333
258837	258837	Olfr545	0	0	0.08	0.33	0.31	0.25	0	0	0.16	0.67	0.63	0.5	0	0	1	4	3.8	3	0.0266667	0.296667	0.0533333	0.6	0.333333	3.6
70223	70223	Nars	384.98	387.76	329.76	449.22	443.25	452.05	765.59	773.95	650.74	897.72	892.49	909.24	16683	16805	14323	18683	18760	19018	367.5	448.173	730.093	899.817	15937	18820.3
244431	244431	Sgcz	0	0.04	0	0	0	0	0	0.09	0	0	0	0	0	1	0	0	0	0	0.0133333	0	0.03	0	0.333333	0
16002	16002	Igf2	141.3	181.13	153.99	239.93	240.25	237.52	281	361.52	303.88	479.47	483.75	477.74	8959	11490	9771	14648	14641	14643	158.807	239.233	315.467	480.32	10073.3	14644
76260	76260	Ttc8	7.03	8.01	7.26	8.78	9.24	8.59	13.98	15.99	14.33	17.54	18.6	17.28	257	293	266	308	330	305	7.43333	8.87	14.7667	17.8067	272	314.333
103963	103963	Rpn1	70.4	72.68	71.15	72.2	73.12	74.69	139.99	145.06	140.41	144.29	147.23	150.23	4324	4467	4377	4253	4382	4453	71.41	73.3367	141.82	147.25	4389.33	4362.67
319266	319266	A130010J15Rik	2.05	2.36	2.35	2.14	2.42	2.1	4.08	4.71	4.64	4.27	4.87	4.23	131.83	153.58	154.72	135	156	132	2.25333	2.22	4.47667	4.45667	146.71	141
240442	240442	Adnp2	9.11	8.82	8.34	8.6	9.21	9.19	18.11	17.6	16.46	17.19	18.55	18.49	746	764	709	689	752	768	8.75667	9	17.39	18.0767	739.667	736.333
56085	56085	Ubqln1	49.31	46.35	51.37	50.54	51.18	48.93	98.06	92.51	101.38	101	103.05	98.42	3041	2860	3173	2998	3085	2936	49.01	50.2167	97.3167	100.823	3024.67	3006.33
27426	27426	Nagpa	8.8	9.19	9.79	8.84	8.76	9.04	17.49	18.35	19.31	17.66	17.63	18.19	302	315	337	291	294	301	9.26	8.88	18.3833	17.8267	318	295.333
108168936	108168936	LOC108168936	0.01	0	0.01	0.03	0.01	0.01	0.02	0.01	0.02	0.06	0.03	0.02	3	1	2	7	3	2	0.00666667	0.0166667	0.0166667	0.0366667	2	4
231861	231861	Tnrc18	21.45	21.5	22.05	25.38	25.31	25.47	42.67	42.91	43.51	50.71	50.97	51.23	4031	4054	4137	4493	4564	4514	21.6667	25.3867	43.03	50.97	4074	4523.67
66404	66404	Rtf2	36.57	39.11	36.2	37.8	35.91	33.07	72.72	78.05	71.43	75.54	72.3	66.52	1247	1333	1238	1238	1197	1095	37.2933	35.5933	74.0667	71.4533	1272.67	1176.67
26422	26422	Nbea	7.46	8.75	8.04	7.2	7.34	7.22	14.83	17.47	15.86	14.39	14.77	14.51	1415	1574	1436	1235	1288	1303	8.08333	7.25333	16.0533	14.5567	1475	1275.33
271639	271639	Adcy10	0.01	0	0	0	0	0	0.02	0	0	0	0	0	1	0	0	0	0	0	0.00333333	0	0.00666667	0	0.333333	0
70676	70676	Gulp1	12.02	11.2	11.48	11.04	11.14	11.23	23.9	22.34	22.66	22.07	22.44	22.6	598	556	572	529	539	541	11.5667	11.1367	22.9667	22.37	575.333	536.333
16816	16816	Lcat	1.51	1.21	0.8	1.72	1.08	0.88	3	2.41	1.58	3.44	2.17	1.77	30	24	16	33	21	17	1.17333	1.22667	2.33	2.46	23.3333	23.6667
78456	78456	C030002A05Rik	0.92	0.98	0.9	1	0.99	1.02	1.84	1.95	1.78	2	1.98	2.05	2331.71	2466.86	2271.58	2420.21	2419.98	2489.9	0.933333	1.00333	1.85667	2.01	2356.72	2443.36
66395	66395	Ahnak	124.37	108.15	114.38	146.38	149.45	151.24	247.33	215.87	225.71	292.53	300.92	304.21	36629	31676	32972	41473	43063	43874	115.633	149.023	229.637	299.22	33759	42803.3
22673	22673	Zfp185	0.13	0.12	0.15	0.2	0.17	0.13	0.27	0.23	0.29	0.4	0.34	0.25	8	7	6	11	10	5	0.133333	0.166667	0.263333	0.33	7	8.66667
27756	27756	Lsm2	22.64	20.37	27.41	38.62	34.51	34.64	45.02	40.65	54.08	77.19	69.48	69.68	246	220	301	406	370	366	23.4733	35.9233	46.5833	72.1167	255.667	380.667
66271	66271	Tmem126a	85.57	93.31	80.77	84.65	92.05	92.97	170.18	186.24	159.38	169.17	185.35	187	784	849	749	752	835	829	86.55	89.89	171.933	180.507	794	805.333
68347	68347	Mettl26	7.71	5.51	8.63	4.92	5.95	3.96	15.34	11.01	17.03	9.84	11.98	7.97	76	54	86	47	58	38	7.28333	4.94333	14.46	9.93	72	47.6667
21429	21429	Ubtf	37.31	36.28	39.05	44.3	42.81	45.59	74.19	72.42	77.06	88.52	86.2	91.7	2054	2017	2113	2159	2169	2281	37.5467	44.2333	74.5567	88.8067	2061.33	2203
28080	28080	Atp5o	218.74	217.6	218.47	208.55	208.77	201.14	434.99	434.33	431.11	416.77	420.36	404.58	2000	1976	2022	1849	1890	1790	218.27	206.153	433.477	413.903	1999.33	1843
279766	279766	Rhbdd3	3.56	4.63	4.28	5.69	4.84	4.25	7.08	9.25	8.44	11.36	9.75	8.55	115	144	134	175	146	127	4.15667	4.92667	8.25667	9.88667	131	149.333
215814	215814	Ccdc28a	2.76	2.92	2.43	2.03	1.46	2.5	5.49	5.82	4.8	4.06	2.93	5.02	60	68	53	43	29	52	2.70333	1.99667	5.37	4.00333	60.3333	41.3333
13643	13643	Efnb3	0.22	0.19	0.34	0.26	0.19	0.16	0.44	0.37	0.67	0.53	0.39	0.32	12	10	19	14	11	9	0.25	0.203333	0.493333	0.413333	13.6667	11.3333
53317	53317	Plrg1	29.74	32.84	32.32	35.04	36.06	35.78	59.13	65.55	63.77	70.03	72.61	71.96	813	897	887	921	965	950	31.6333	35.6267	62.8167	71.5333	865.667	945.333
75985	75985	Rab30	7.25	5.91	7.27	6.23	5.63	5.32	14.41	11.8	14.35	12.44	11.34	10.7	424	418	449	347	379	367	6.81	5.72667	13.52	11.4933	430.333	364.333
56717	56717	Mtor	9.74	10.18	10.49	9.26	9.24	9.15	19.37	20.31	20.7	18.51	18.61	18.39	1383	1427	1490	1275	1303	1287	10.1367	9.21667	20.1267	18.5033	1433.33	1288.33
233824	233824	Cog7	7.04	9.22	8.31	8.47	8.54	8.34	14.01	18.4	16.39	16.93	17.2	16.78	334	438	396	386	396	385	8.19	8.45	16.2667	16.97	389.333	389
266614	266614	Ly6g5b	0.42	0.3	0.56	0.65	0.53	0.67	0.84	0.6	1.1	1.29	1.07	1.34	31.1	22.11	30.55	45.68	38.18	47.74	0.426667	0.616667	0.846667	1.23333	27.92	43.8667
66058	66058	Tmem176a	37.76	51.25	37.74	21.35	20.73	21.62	75.1	102.29	74.48	42.67	41.75	43.49	545	738	550	298	295	304	42.25	21.2333	83.9567	42.6367	611	299
329436	329436	Gm14461	0.36	0.4	0.69	0	0	0	0.72	0.8	1.36	0	0	0	10	11	19	0	0	0	0.483333	0	0.96	0	13.3333	0
19653	19653	Rbm4	9.75	11.03	9.93	7.25	7.4	7.13	19.39	22.02	19.6	14.49	14.9	14.35	392.05	441.95	402.46	276.07	283.38	278.97	10.2367	7.26	20.3367	14.58	412.153	279.473
68188	68188	Sympk	33.23	32.5	31.53	34.48	33.95	32.81	66.08	64.87	62.22	68.9	68.35	65.99	2335	2286	2221	2323	2326	2237	32.42	33.7467	64.39	67.7467	2280.67	2295.33
209268	209268	Igsf1	0.15	0.13	0.17	0	0.03	0	0.31	0.27	0.33	0	0.05	0	7	4	6	0	1	0	0.15	0.01	0.303333	0.0166667	5.66667	0.333333
22411	22411	Wnt11	1.02	0.95	0.86	0.46	0.59	0.6	2.03	1.9	1.69	0.92	1.19	1.2	47	41	40	21	23	22	0.943333	0.55	1.87333	1.10333	42.6667	22
27357	27357	Gyg	43.45	55.49	42.11	30.64	30.17	30.53	86.4	110.76	83.1	61.24	60.76	61.4	1149	1466	1118	779	781	784	47.0167	30.4467	93.42	61.1333	1244.33	781.333
13508	13508	Dscam	0.03	0.07	0.13	0.05	0.02	0.02	0.06	0.13	0.25	0.11	0.05	0.04	4	7	4	5	3	2	0.0766667	0.03	0.146667	0.0666667	5	3.33333
68995	68995	Mcts1	28.54	33.71	28.31	34.07	30.1	32.97	56.75	67.29	55.86	68.09	60.6	66.31	393	456	392	455	404	431	30.1867	32.38	59.9667	65	413.667	430
99349	99349	Dnajc24	6.51	8.42	7.17	8.22	8.61	8.34	12.94	16.81	14.15	16.44	17.34	16.77	110	142	122	134	143	137	7.36667	8.39	14.6333	16.85	124.667	138
171504	171504	Apobr	8.86	12.71	8.2	12.23	12.1	11.53	17.63	25.37	16.18	24.45	24.37	23.18	528.64	762.89	490.36	709	709.29	673.46	9.92333	11.9533	19.7267	24	593.963	697.25
258463	258463	Olfr1393	0.11	0.17	0.1	0.14	0.17	0.18	0.22	0.34	0.19	0.29	0.35	0.36	5.04	6.58	4.02	5.2	8.01	8	0.126667	0.163333	0.25	0.333333	5.21333	7.07
626848	626848	Zfp971	13.85	13.85	12.37	7.86	10.26	9.1	27.53	27.65	24.41	15.72	20.66	18.29	319.09	342.16	314.65	184.7	219.63	197.5	13.3567	9.07333	26.53	18.2233	325.3	200.61
11722	11722	Amy1	0.12	0.24	0.04	0	0.04	0	0.24	0.47	0.08	0	0.08	0	3	6	1	0	1	0	0.133333	0.0133333	0.263333	0.0266667	3.33333	0.333333
72199	72199	Mms19	10.74	10.38	10.16	12.1	11.88	11.68	21.35	20.72	20.05	24.17	23.92	23.5	681.71	662.63	625.42	739.6	735.01	729.37	10.4267	11.8867	20.7067	23.8633	656.587	734.66
107934	107934	Celsr3	0.18	0.2	0.25	0.12	0.1	0.09	0.35	0.41	0.5	0.25	0.2	0.18	37	43	53	25	20	18	0.21	0.103333	0.42	0.21	44.3333	21
14687	14687	Gnaz	0.11	0.15	0.13	0.09	0.17	0.1	0.21	0.3	0.25	0.19	0.35	0.21	6	9	7	5	10	6	0.13	0.12	0.253333	0.25	7.33333	7
72269	72269	Cda	1.22	0.72	0.7	0.32	0.21	0.52	2.43	1.43	1.39	0.63	0.41	1.05	12	7	7	3	2	5	0.88	0.35	1.75	0.696667	8.66667	3.33333
78618	78618	Acap2	18.45	20.41	19.08	16.23	16.51	17.03	36.68	40.74	37.65	32.44	33.24	34.26	2092	2318	2167	1764	1826	1876	19.3133	16.59	38.3567	33.3133	2192.33	1822
319169	319169	H2ac15	0	0	0.2	0.21	0.21	0	0	0	0.4	0.42	0.41	0	0	0	1	1	1	0	0.0666667	0.14	0.133333	0.276667	0.333333	0.666667
320500	320500	Tmem215	0.03	0	0	0.03	0	0.06	0.05	0	0	0.06	0	0.11	1	0	0	1	0	2	0.01	0.03	0.0166667	0.0566667	0.333333	1
74204	74204	Xpo6	28.4	27.6	29.3	32.52	32.88	32.75	56.47	55.1	57.82	64.98	66.21	65.88	2155	2065	2191	2373	2357	2370	28.4333	32.7167	56.4633	65.69	2137	2366.67
382034	382034	Gse1	5.39	5.15	5.34	5.68	5.61	5.56	10.73	10.27	10.53	11.35	11.29	11.18	637	617	649	681	693	672	5.29333	5.61667	10.51	11.2733	634.333	682
67711	67711	Nsmce1	35.25	29.87	34.17	44.18	41.05	44.76	70.11	59.62	67.43	88.29	82.65	90.03	450	380	443	544	515	554	33.0967	43.33	65.72	86.99	424.333	537.667
21834	21834	Thrb	0.21	0.25	0.16	0.2	0.09	0.16	0.42	0.5	0.32	0.4	0.18	0.33	23	27	18	22	9	17	0.206667	0.15	0.413333	0.303333	22.6667	16
108100	108100	Baiap2	7.79	7.8	8.1	7.72	8.51	9.25	15.5	15.56	15.98	15.42	17.14	18.6	373	427	411	376	401	394	7.89667	8.49333	15.68	17.0533	403.667	390.333
67615	67615	Ube2r2	35.5	36.02	37.26	31.91	33.12	30.62	70.59	71.89	73.52	63.77	66.69	61.59	1967	1997	2068	1696	1791	1647	36.26	31.8833	72	64.0167	2010.67	1711.33
12695	12695	Patj	3.51	2.46	3.29	3.55	3.92	3.6	6.98	4.92	6.49	7.1	7.89	7.25	330	274	306	357	378	320	3.08667	3.69	6.13	7.41333	303.333	351.667
227526	227526	Cdnf	0.72	0.78	0.52	0.33	0.55	0.33	1.43	1.56	1.02	0.67	1.11	0.66	36	39	26	16	27	16	0.673333	0.403333	1.33667	0.813333	33.6667	19.6667
93759	93759	Sirt1	7.45	6.43	6.51	10.1	9.97	10.33	14.81	12.83	12.85	20.18	20.08	20.78	491	426	432	637	641	662	6.79667	10.1333	13.4967	20.3467	449.667	646.667
67375	67375	Qprt	0.06	0.12	0.18	0.12	0.12	0.06	0.12	0.24	0.35	0.25	0.24	0.12	1	2	3	2	2	1	0.12	0.1	0.236667	0.203333	2	1.66667
72831	72831	Dhx30	15.02	15.15	15.49	18.38	19.23	18.22	29.87	30.23	30.57	36.73	38.73	36.65	1027	1034	1058	1198	1271	1206	15.22	18.61	30.2233	37.37	1039.67	1225
52477	52477	Angel2	12.32	12.15	12.11	14.49	14.03	14.54	24.49	24.26	23.91	28.96	28.25	29.25	694	689	683	791	773	802	12.1933	14.3533	24.22	28.82	688.667	788.667
67505	67505	Prl7c1	0	0	0	0	0.09	0	0	0	0	0	0.19	0	0	0	0	0	1	0	0	0.03	0	0.0633333	0	0.333333
15376	15376	Foxa2	0	0.03	0.03	0	0.03	0	0	0.06	0.06	0	0.06	0	0	1	1	0	1	0	0.02	0.01	0.04	0.02	0.666667	0.333333
15247	15247	Mfsd14a	22.19	24.01	22.82	22.78	23.65	24.3	44.12	47.92	45.04	45.53	47.62	48.88	1017	1100	1047	1005	1058	1078	23.0067	23.5767	45.6933	47.3433	1054.67	1047
27404	27404	Abca8b	0.31	0.42	0.44	0.68	0.76	0.44	0.62	0.84	0.87	1.36	1.53	0.89	40	50	45	52	58	35	0.39	0.626667	0.776667	1.26	45	48.3333
16992	16992	Lta	0.05	0.05	0.15	0.21	0.1	0.15	0.1	0.1	0.29	0.41	0.2	0.31	1	1	3	4	2	3	0.0833333	0.153333	0.163333	0.306667	1.66667	3
73673	73673	Rec114	0.97	0.58	1.07	0.81	0.64	0.98	1.92	1.17	2.12	1.63	1.29	1.97	34	22	32	19	21	31	0.873333	0.81	1.73667	1.63	29.3333	23.6667
108167918	108167918	Gm46290	0.1	0.34	0	0.22	0.28	0.27	0.21	0.67	0	0.44	0.56	0.55	4.68	15.14	0	9.38	12.12	11.96	0.146667	0.256667	0.293333	0.516667	6.60667	11.1533
12154	12154	Bmp10	0	0	0	0.16	0.11	0.27	0	0	0	0.32	0.21	0.54	0	0	0	3	2	5	0	0.18	0	0.356667	0	3.33333
115489935	115489935	LOC115489935	0.2	0.17	0.1	0.22	0.15	0.06	0.4	0.34	0.2	0.44	0.3	0.12	8.56	7.27	4.42	9.1	6.25	2.44	0.156667	0.143333	0.313333	0.286667	6.75	5.93
13361	13361	Dhfr	4.17	2.98	3.66	8.27	8.71	8.63	8.29	5.95	7.22	16.52	17.54	17.36	381	273	335	724.68	776.71	766	3.60333	8.53667	7.15333	17.14	329.667	755.797
60322	60322	Chst7	2.88	2.2	2.93	1.54	1.34	1.7	5.73	4.38	5.78	3.08	2.7	3.42	101	77	103	52	46	58	2.67	1.52667	5.29667	3.06667	93.6667	52
338349	338349	Cntln	4.3	4.57	4.11	6.91	7.03	7.74	8.55	9.12	8.11	13.8	14.15	15.56	361	393	342	536	587	639	4.32667	7.22667	8.59333	14.5033	365.333	587.333
67307	67307	Pbld2	0.34	0.23	0.26	0.35	0.34	0.35	0.67	0.46	0.51	0.7	0.68	0.7	12	9	10	12	12	11	0.276667	0.346667	0.546667	0.693333	10.3333	11.6667
59044	59044	Rnf130	27.81	28.22	28.85	20.2	20.08	20.83	55.3	56.33	56.94	40.36	40.44	41.89	687	684	712	483	495	502	28.2933	20.37	56.19	40.8967	694.333	493.333
208618	208618	Etl4	1.64	2.13	1.38	2.86	2.92	2.79	3.25	4.25	2.73	5.72	5.89	5.61	202	268	172	337	357	335	1.71667	2.85667	3.41	5.74	214	343
18701	18701	Pigf	14.77	10.27	11.1	10.84	12.23	12.33	29.37	20.5	21.91	21.65	24.63	24.79	190.97	132.23	144.79	135.37	155.82	155.01	12.0467	11.8	23.9267	23.69	155.997	148.733
115486930	115486930	LOC115486930	0	0.04	0	0	0	0	0	0.07	0	0	0	0	0	2	0	0	0	0	0.0133333	0	0.0233333	0	0.666667	0
74320	74320	Wdr33	19.24	19.19	19.42	19.89	19.06	21.3	38.27	38.31	38.32	39.75	38.38	42.84	1139	1237	1177	1191	1181	1221	19.2833	20.0833	38.3	40.3233	1184.33	1197.67
103737	103737	Pex12	3.66	4.47	3.7	3.2	3.91	3.61	7.28	8.93	7.3	6.39	7.86	7.26	139.34	171.86	143.87	118.7	143.81	134.39	3.94333	3.57333	7.83667	7.17	151.69	132.3
15216	15216	Hfe	2.31	4.4	2.67	1.33	1.2	1.34	4.6	8.77	5.27	2.66	2.41	2.7	117.02	223	141.83	60.91	57.99	68.05	3.12667	1.29	6.21333	2.59	160.617	62.3167
12971	12971	Crym	0.11	0.28	0.55	0.4	0.34	0.17	0.22	0.55	1.09	0.8	0.68	0.34	2	5	10	7	6	3	0.313333	0.303333	0.62	0.606667	5.66667	5.33333
66983	66983	Zfp830	5.24	5.07	4.28	4.19	4.62	4.85	10.42	10.12	8.45	8.36	9.3	9.76	287	278	235	220	247	258	4.86333	4.55333	9.66333	9.14	266.667	241.667
51801	51801	Ramp1	1.74	1.51	1.01	0.52	0.97	0.62	3.47	3.01	1.99	1.05	1.95	1.25	67	46	42	18	26	25	1.42	0.703333	2.82333	1.41667	51.6667	23
103468	103468	Nup107	21.21	20.6	22.3	28.78	31.61	30.84	42.18	41.11	44.02	57.52	63.64	62.03	1090	1059	1148	1419	1585	1538	21.37	30.41	42.4367	61.0633	1099	1514
18636	18636	Cfp	8.76	12.6	15.33	1	0.74	0.74	17.42	25.14	30.25	2	1.49	1.5	218	313	383	24	18	18	12.23	0.826667	24.27	1.66333	304.667	20
71887	71887	Ppm1j	2.39	2.24	1.55	1.8	1.72	1.64	4.74	4.46	3.06	3.61	3.47	3.3	65	61	42	47	46	43	2.06	1.72	4.08667	3.46	56	45.3333
17448	17448	Mdh2	242.39	228.66	247.98	245.13	253.74	252.62	482.02	456.41	489.34	489.87	510.91	508.11	4468	4205	4598	4353	4591	4525	239.677	250.497	475.923	502.963	4423.67	4489.67
70208	70208	Med23	7.29	7.76	8.3	7.65	7.46	7.6	14.51	15.48	16.37	15.3	15.03	15.29	619	659	705	623	618	626	7.78333	7.57	15.4533	15.2067	661	622.333
226841	226841	Vash2	8.08	8.42	8.4	12.57	12.71	12.68	16.07	16.81	16.57	25.13	25.58	25.5	552	575	574	823	847	840	8.3	12.6533	16.4833	25.4033	567	836.667
67223	67223	Rrp15	33.42	24.87	29.79	39.38	38.53	37.98	66.46	49.64	58.79	78.71	77.58	76.39	574	426	515	652	650	634	29.36	38.63	58.2967	77.56	505	645.333
320961	320961	A630026N12Rik	0.9	1.15	0.8	0.48	0.44	0.52	1.78	2.3	1.57	0.97	0.89	1.05	83	107	74	43	40	47	0.95	0.48	1.88333	0.97	88	43.3333
216190	216190	Appl2	7.66	9.29	8.92	5.97	5.49	5.37	15.24	18.54	17.59	11.92	11.05	10.81	438	537	504	301	286	275	8.62333	5.61	17.1233	11.26	493	287.333
107607	107607	Nod1	4.57	4.85	5.41	2.03	1.88	1.86	9.08	9.68	10.68	4.06	3.78	3.74	337	358	400	141	135	133	4.94333	1.92333	9.81333	3.86	365	136.333
21781	21781	Tfdp1	77.47	67.41	76.24	102.2	99.95	100.65	154.05	134.54	150.45	204.23	201.25	202.44	3243	2821	3200	4112	4081	4086	73.7067	100.933	146.347	202.64	3088	4093
77647	77647	Trat1	0.03	0.06	0.05	0.03	0.01	0.03	0.05	0.12	0.1	0.05	0.03	0.05	2.1	5	4	1.95	1	2	0.0466667	0.0233333	0.09	0.0433333	3.7	1.65
115489141	115489141	LOC115489141	0.1	0.12	0.23	0.14	0.19	0.32	0.2	0.23	0.45	0.28	0.38	0.65	2.62	2.99	5.88	3.46	4.73	8.08	0.15	0.216667	0.293333	0.436667	3.83	5.42333
67586	67586	Ubxn11	0.75	0.98	0.38	0.92	0.64	0.72	1.5	1.95	0.75	1.84	1.29	1.44	18	24	10	24	21	22	0.703333	0.76	1.4	1.52333	17.3333	22.3333
330189	330189	Tmem120b	3.91	4.1	4.01	4.25	3.99	4.47	7.78	8.18	7.92	8.49	8.04	8.99	124	130	126	124	120	133	4.00667	4.23667	7.96	8.50667	126.667	125.667
22344	22344	Vezf1	17.82	18.1	16.39	16.4	16.75	17.65	35.43	36.13	32.34	32.76	33.73	35.51	1256	1266	1155	1106	1132	1219	17.4367	16.9333	34.6333	34	1225.67	1152.33
14625	14625	Gykl1	0	0.03	0	0	0	0	0	0.07	0	0	0	0	0	1	0	0	0	0	0.01	0	0.0233333	0	0.333333	0
97961	97961	Nol12	21.13	21.46	19.65	23.51	24.68	24.72	42.02	42.84	38.78	46.99	49.7	49.73	560	549	529	605	635	625	20.7467	24.3033	41.2133	48.8067	546	621.667
102632353	102632353	Gm30447	0	0	0	0	0	0.02	0	0	0	0	0	0.04	0	0	0	0	0	1	0	0.00666667	0	0.0133333	0	0.333333
329716	329716	BC107364	0.04	0.03	0.01	0.08	0	0.01	0.08	0.06	0.02	0.16	0	0.02	4	3	1	2	0	1	0.0266667	0.03	0.0533333	0.06	2.66667	1
231724	231724	Rad9b	0.59	1.03	0.45	1.01	0.8	0.68	1.18	2.05	0.89	2.02	1.62	1.36	21.6	44.61	18.4	38.6	28.43	22.92	0.69	0.83	1.37333	1.66667	28.2033	29.9833
16815	16815	Lbx2	0	0.3	0.1	0	0.1	0	0	0.6	0.2	0	0.2	0	0	3	1	0	1	0	0.133333	0.0333333	0.266667	0.0666667	1.33333	0.333333
13616	13616	Edn3	0.02	0	0	0	0.02	0	0.04	0	0	0	0.04	0	1	0	0	0	1	0	0.00666667	0.00666667	0.0133333	0.0133333	0.333333	0.333333
72318	72318	Cyth4	4.14	6.46	7.65	0.09	0	0	8.22	12.9	15.09	0.18	0	0	190	297	352	4	0	0	6.08333	0.03	12.07	0.06	279.667	1.33333
80976	80976	Syt13	24.41	21.64	24.09	15.61	14.99	15.68	48.55	43.19	47.55	31.19	30.17	31.54	1548	1373	1530	949	927	965	23.38	15.4267	46.43	30.9667	1483.67	947
226999	226999	Slc9a2	0.12	0.05	0.1	0.04	0.03	0.04	0.24	0.1	0.2	0.07	0.07	0.07	7	3	6	2	2	2	0.09	0.0366667	0.18	0.07	5.33333	2
14394	14394	Gabra1	0.12	0.1	0.07	0.03	0.09	0.07	0.23	0.2	0.14	0.06	0.18	0.15	8	7	5	2	6	5	0.0966667	0.0633333	0.19	0.13	6.66667	4.33333
544678	544678	Cfap74	2.24	1.63	1.7	1.9	1.52	1.62	4.46	3.25	3.36	3.79	3.06	3.27	95	67	72	77	61	67	1.85667	1.68	3.69	3.37333	78	68.3333
104776	104776	Aldh6a1	3.19	4.3	3.79	3.11	3.11	3.06	6.34	8.58	7.48	6.22	6.26	6.15	183	247	218	172	175	171	3.76	3.09333	7.46667	6.21	216	172.667
16001	16001	Igf1r	19.03	18.02	19.88	20.63	21.09	20.98	37.84	35.97	39.24	41.22	42.47	42.2	4055	3834	4214	4211	4380	4332	18.9767	20.9	37.6833	41.9633	4034.33	4307.67
12952	12952	Cry1	6.92	7.07	6.25	6.13	6.4	5.85	13.76	14.12	12.32	12.24	12.89	11.76	346	354	313	294	313	284	6.74667	6.12667	13.4	12.2967	337.667	297
75219	75219	Dusp18	5.31	5.1	4.85	4.91	4.45	4.65	10.56	10.18	9.57	9.81	8.96	9.36	422	406	386	374	345	359	5.08667	4.67	10.1033	9.37667	404.667	359.333
56620	56620	Clec4n	18.83	20.43	39.23	0.79	0.51	0.91	37.45	40.77	77.41	1.58	1.03	1.82	324	348	678	13	8	15	26.1633	0.736667	51.8767	1.47667	450	12
231855	231855	Ap5z1	3.62	4.16	4.43	4.61	4.58	3.95	7.19	8.3	8.74	9.21	9.22	7.94	238	275	290	289	295	252	4.07	4.38	8.07667	8.79	267.667	278.667
26951	26951	Zw10	13.9	11.82	14.78	17.56	16.25	17.32	27.63	23.59	29.17	35.1	32.73	34.84	665	566	709	807	760	805	13.5	17.0433	26.7967	34.2233	646.667	790.667
69149	69149	Kbtbd3	0.64	0.6	1.06	0.75	0.76	0.95	1.28	1.2	2.09	1.51	1.53	1.9	33	31	46	28	31	40	0.766667	0.82	1.52333	1.64667	36.6667	33
12537	12537	Cdk11b	42.32	45.03	40.94	49.8	47.23	49.3	84.15	89.88	80.79	99.52	95.1	99.16	1843	1964	1790	2067	1995	2071	42.7633	48.7767	84.94	97.9267	1865.67	2044.33
105246320	105246320	Gm26637	0.23	0.39	0.17	0.07	0.13	0.11	0.45	0.78	0.33	0.14	0.25	0.21	6	10	4	2	3	3	0.263333	0.103333	0.52	0.2	6.66667	2.66667
52653	52653	Nudcd2	47.64	46.15	47.38	46.24	47.34	49.87	94.73	92.11	93.51	92.41	95.33	100.31	1146	1105	1141	1066	1111	1165	47.0567	47.8167	93.45	96.0167	1130.67	1114
207806	207806	Usf3	3.99	4.46	3.9	3.06	3.26	3.21	7.94	8.89	7.69	6.12	6.57	6.45	897	1003	875	660	713	703	4.11667	3.17667	8.17333	6.38	925	692
56293	56293	Slc35g3	0.09	0.13	0	0	0.05	0.05	0.18	0.27	0	0	0.09	0.09	2	3	0	0	1	1	0.0733333	0.0333333	0.15	0.06	1.66667	0.666667
64293	64293	Stk32b	0.02	0.03	0.02	0	0.02	0	0.03	0.07	0.03	0	0.04	0	1	2	1	0	1	0	0.0233333	0.00666667	0.0433333	0.0133333	1.33333	0.333333
106052	106052	Fbxo4	5.46	5.44	5.71	5.21	4.69	5.95	10.86	10.86	11.27	10.41	9.45	11.96	316	315	331	289	265	334	5.53667	5.28333	10.9967	10.6067	320.667	296
384061	384061	Fndc5	0.04	0.02	0	0.05	0.09	0.07	0.09	0.04	0	0.09	0.18	0.14	2	1	0	2	4	3	0.02	0.07	0.0433333	0.136667	1	3
66720	66720	Klhl10	0.22	0.09	0.16	0.16	0.06	0	0.43	0.19	0.31	0.33	0.11	0	5	3	5	3	2	0	0.156667	0.0733333	0.31	0.146667	4.33333	1.66667
245884	245884	Fam71f2	0.23	0.15	0.16	0.11	0.25	0.08	0.45	0.3	0.32	0.23	0.49	0.15	4	2	3	2	4	1	0.18	0.146667	0.356667	0.29	3	2.33333
19733	19733	Rgn	0	0.08	0	0.04	0	0	0	0.17	0	0.09	0	0	0	2	0	1	0	0	0.0266667	0.0133333	0.0566667	0.03	0.666667	0.333333
211480	211480	Kcnj14	0.19	0.14	0.09	0.14	0.17	0.12	0.37	0.28	0.18	0.29	0.33	0.24	8	6	4	6	7	5	0.14	0.143333	0.276667	0.286667	6	6
23832	23832	Xcr1	0.08	0.13	0.08	0.1	0	0.08	0.16	0.26	0.16	0.19	0	0.16	6	10	6	7	0	6	0.0966667	0.06	0.193333	0.116667	7.33333	4.33333
20495	20495	Slc12a1	0.14	0.08	0.09	0.17	0.13	0.13	0.27	0.15	0.17	0.34	0.26	0.26	11	6	7	13	10	10	0.103333	0.143333	0.196667	0.286667	8	11
50793	50793	Orc3	19.2	19.94	20.22	21.12	21.97	23.14	38.18	39.8	39.91	42.21	44.24	46.55	820	830	806	891	918	894	19.7867	22.0767	39.2967	44.3333	818.667	901
620913	620913	Gm12185	0.06	0.08	0.12	0	0.02	0.01	0.11	0.17	0.23	0	0.05	0.02	5.11	7.69	10.84	0	2	1	0.0866667	0.01	0.17	0.0233333	7.88	1
171382	171382	Trpm8	0	0.03	0	0	0.03	0	0	0.06	0	0	0.06	0	0	1	0	0	1	0	0.01	0.01	0.02	0.02	0.333333	0.333333
213438	213438	P2ry10b	4.68	3.51	5.12	1.97	2.43	2.43	9.3	7	10.1	3.94	4.9	4.88	236	177	259	95	120	119	4.43667	2.27667	8.8	4.57333	224	111.333
71607	71607	Snx20	1.55	1.75	2.67	0.2	0.14	0.05	3.08	3.49	5.28	0.39	0.29	0.1	35	38	58	4	3	1	1.99	0.13	3.95	0.26	43.6667	2.66667
29861	29861	Dpf1	2.36	1.75	2.16	2.11	2.06	2.39	4.7	3.5	4.26	4.22	4.14	4.8	89	67	81	75	74	88	2.09	2.18667	4.15333	4.38667	79	79
72085	72085	Osgepl1	3.04	3.18	3.82	3.52	2.98	3.72	6.05	6.34	7.54	7.04	6.01	7.48	89	92	112	98	85	107	3.34667	3.40667	6.64333	6.84333	97.6667	96.6667
381290	381290	Atp2b4	3.63	5.41	3.55	4.56	4.93	4.44	7.22	10.79	7	9.11	9.94	8.94	514	775	476	630	676	644	4.19667	4.64333	8.33667	9.33	588.333	650
29817	29817	Igfbp7	458.5	448.69	404.21	272.77	280.04	258.64	911.8	895.57	797.66	545.11	563.87	520.22	7104	6928	6307	4078	4268	3894	437.133	270.483	868.343	543.067	6779.67	4080
67498	67498	Kcnv1	0	0	0	0	0	0	0.01	0	0.01	0	0	0	1	0	1	0	0	0	0	0	0.00666667	0	0.666667	0
19679	19679	Pitpnm2	9.2	7.73	8.09	7.6	7.15	7	18.29	15.43	15.96	15.18	14.4	14.07	1146	964	1005	910	868	851	8.34	7.25	16.56	14.55	1038.33	876.333
12041	12041	Bckdk	17.8	18.31	19.4	18.24	17.56	18.08	35.41	36.54	38.28	36.46	35.36	36.36	839	863	916	825	808	827	18.5033	17.96	36.7433	36.06	872.667	820
333670	333670	Gm867	0.23	0.42	0.27	0.26	0.09	0.32	0.47	0.85	0.54	0.52	0.18	0.64	8	12	4	5	2	3	0.306667	0.223333	0.62	0.446667	8	3.33333
217066	217066	Elobl	1.5	3.28	2.1	0.26	0	0.41	2.98	6.54	4.14	0.52	0	0.83	15	31	21	2	0	4	2.29333	0.223333	4.55333	0.45	22.3333	2
258019	258019	Olfr212	0.02	0	0.02	0.02	0.02	0.02	0.05	0	0.04	0.05	0.05	0.05	1	0	1	1	1	1	0.0133333	0.02	0.03	0.05	0.666667	1
215335	215335	Slc36a1	11.29	11.85	11.33	8.77	8.72	8.91	22.45	23.64	22.36	17.52	17.56	17.92	1029	1081	1034	766	775	788	11.49	8.8	22.8167	17.6667	1048	776.333
12411	12411	Cbs	0.2	0.25	0.2	0.24	0.31	0.21	0.4	0.5	0.39	0.47	0.61	0.42	8	10	8	9	12	8	0.216667	0.253333	0.43	0.5	8.66667	9.66667
329274	329274	Fam163a	0.02	0.03	0	0	0.03	0.02	0.03	0.06	0	0	0.06	0.03	1	2	0	0	2	1	0.0166667	0.0166667	0.03	0.03	1	1
433292	433292	Nms	0	0	0	0	0.08	0	0	0	0	0	0.16	0	0	0	0	0	1	0	0	0.0266667	0	0.0533333	0	0.333333
52686	52686	Mettl2	6.35	7.98	6.55	11.59	10.7	11.22	12.62	15.93	12.93	23.16	21.55	22.56	264	334	275	463.98	437	455	6.96	11.17	13.8267	22.4233	291	451.993
78308	78308	Gpr108	21	21.67	21.43	17.69	19.18	18.51	41.77	43.25	42.29	35.35	38.61	37.22	716	738	734	578	638	612	21.3667	18.46	42.4367	37.06	729.333	609.333
73336	73336	Prss44	0	0	0.03	0	0	0	0	0	0.07	0	0	0	0	0	1	0	0	0	0.01	0	0.0233333	0	0.333333	0
263803	263803	Pkn3	2.53	2.51	2.51	5.15	4.42	4.71	5.03	5	4.96	10.3	8.9	9.48	140	139	142	273	236	251	2.51667	4.76	4.99667	9.56	140.333	253.333
18218	18218	Dusp8	2.14	2.89	2.46	2.55	2.4	1.86	4.26	5.76	4.84	5.1	4.84	3.75	177	240	203	197	191	145	2.49667	2.27	4.95333	4.56333	206.667	177.667
69125	69125	Cnot8	25.07	26.21	22.71	21.81	21.98	21.21	49.85	52.32	44.8	43.58	44.27	42.67	891	930	810	741	764	732	24.6633	21.6667	48.99	43.5067	877	745.667
18796	18796	Plcb2	0.36	0.39	0.35	0	0	0.04	0.71	0.78	0.69	0	0	0.08	37	33	41	0	0	2	0.366667	0.0133333	0.726667	0.0266667	37	0.666667
18000	18000	2024-09-02	149.6	152.28	142.96	158.18	163.3	165.63	297.5	303.94	282.12	316.1	328.8	333.15	8057	8209	7715	8167	8584	8661	148.28	162.37	294.52	326.017	7993.67	8470.67
66314	66314	Tpd52l2	39.63	43.17	36.99	42.66	38.8	38.2	78.81	86.16	72.99	85.25	78.13	76.83	1211	1236	1077	1066	1102	1051	39.93	39.8867	79.32	80.07	1174.67	1073
18019	18019	Nfatc2	0.18	0.24	0.34	0.19	0.15	0.15	0.36	0.47	0.67	0.39	0.29	0.29	21	28	36	21	15	14	0.253333	0.163333	0.5	0.323333	28.3333	16.6667
55927	55927	Hes6	10	10.07	9.28	6.85	8.04	8.12	19.89	20.11	18.31	13.69	16.19	16.33	194	195	181	128	153	153	9.78333	7.67	19.4367	15.4033	190	144.667
100042149	100042149	Gm3696	0.62	0.84	0.72	0.75	1.07	0.77	1.24	1.67	1.41	1.5	2.15	1.56	20.97	27.05	22.58	24.53	33.07	25.4	0.726667	0.863333	1.44	1.73667	23.5333	27.6667
106504	106504	Stk38	26.3	29.38	26.32	21.39	20.62	20.72	52.31	58.64	51.94	42.75	41.52	41.67	1476	1650	1480	1152	1129	1128	27.3333	20.91	54.2967	41.98	1535.33	1136.33
75129	75129	4930524J08Rik	1.74	0.88	0.86	1.94	1.9	1.64	3.47	1.76	1.69	3.88	3.82	3.3	12	6	6	13	13	11	1.16	1.82667	2.30667	3.66667	8	12.3333
70357	70357	Kcnip1	0.03	0.16	0.13	0.55	0.55	0.64	0.07	0.32	0.26	1.09	1.11	1.28	1	6	4	16	17	21	0.106667	0.58	0.216667	1.16	3.66667	18
53623	53623	Gria3	10.31	11.46	12.1	10.57	9.41	10.64	20.51	22.87	23.87	21.12	18.94	21.4	706	798	780	685	653	708	11.29	10.2067	22.4167	20.4867	761.333	682
68178	68178	Cgnl1	31.74	25.87	35.27	8.11	7.81	7.38	63.12	51.64	69.6	16.2	15.73	14.85	3764	3072	4185	922	904	848	30.96	7.76667	61.4533	15.5933	3673.67	891.333
19881	19881	Rom1	2.14	2.28	2.04	1.23	1.29	1.35	4.26	4.54	4.04	2.45	2.6	2.72	49	52	47	27	29	30	2.15333	1.29	4.28	2.59	49.3333	28.6667
69091	69091	Vps26b	11.55	13.13	12.24	11.95	11.77	11.92	22.97	26.21	24.14	23.89	23.7	23.97	1389.33	1581.25	1472.56	1377.34	1379.33	1390.8	12.3067	11.88	24.44	23.8533	1481.05	1382.49
12972	12972	Cryz	6.23	7.27	5.55	7.95	8.84	8.81	12.39	14.51	10.95	15.88	17.79	17.73	253.87	287.8	215	302.62	337.53	340.81	6.35	8.53333	12.6167	17.1333	252.223	326.987
57436	57436	Gabarapl1	66.51	69.83	72.63	42.37	40.75	42.57	132.27	139.38	143.32	84.66	82.05	85.63	1821	1910	1996	1115	1092	1132	69.6567	41.8967	138.323	84.1133	1909	1113
16650	16650	Kpna6	30.31	28.03	28.91	25.96	25.62	25.95	60.27	55.94	57.06	51.89	51.59	52.19	3004	2781	2868	2466	2475	2496	29.0833	25.8433	57.7567	51.89	2884.33	2479
11980	11980	Atp8a1	0.59	0.97	0.86	0.55	0.55	0.63	1.17	1.94	1.69	1.11	1.12	1.26	74	127	108	67	69	75	0.806667	0.576667	1.6	1.16333	103	70.3333
57246	57246	Tbx20	0.31	0.36	0.33	0.02	0.05	0.03	0.62	0.72	0.64	0.04	0.1	0.06	35	32	30	2	1	3	0.333333	0.0333333	0.66	0.0666667	32.3333	2
192190	192190	Pkhd1l1	0.2	0.23	0.12	0.02	0.01	0.04	0.4	0.46	0.23	0.04	0.03	0.07	47	54	27	4	3	8	0.183333	0.0233333	0.363333	0.0466667	42.6667	5
237175	237175	Adgrg2	3.34	3.74	3.39	2.4	2.61	2.47	6.64	7.47	6.68	4.79	5.26	4.97	272	306	276	189	210	197	3.49	2.49333	6.93	5.00667	284.667	198.667
11771	11771	Ap2a1	48.41	44.99	50.29	46.04	44.46	44.91	96.27	89.8	99.25	92.01	89.52	90.33	2736.78	2548.48	2849.65	2500.4	2455.51	2467.37	47.8967	45.1367	95.1067	90.62	2711.64	2474.43
80892	80892	Zfhx4	4.29	5.13	4.4	5.33	5.13	5.55	8.53	10.25	8.68	10.66	10.33	11.17	1067	1281	1093	1269	1243	1342	4.60667	5.33667	9.15333	10.72	1147	1284.67
633285	633285	Rbm46	0.29	0.36	0.28	0.27	0.4	0.26	0.58	0.72	0.55	0.55	0.8	0.53	12	18	17	14	16	13	0.31	0.31	0.616667	0.626667	15.6667	14.3333
52004	52004	Cdk2ap2	20.73	21.1	19.69	19.49	19.88	17.02	41.23	42.11	38.86	38.94	40.03	34.23	288	293	275	251	269	213	20.5067	18.7967	40.7333	37.7333	285.333	244.333
20472	20472	Six2	0.84	0.93	1.17	0.53	0.76	0.72	1.66	1.86	2.32	1.06	1.54	1.46	28	30	39	17	25	23	0.98	0.67	1.94667	1.35333	32.3333	21.6667
75691	75691	Anks6	1.34	1.94	1.64	1.95	1.9	1.92	2.67	3.88	3.23	3.89	3.82	3.87	91	124	106	116	122	120	1.64	1.92333	3.26	3.86	107	119.333
243499	243499	Lrrtm4	0.02	0	0.02	0.02	0	0	0.04	0	0.03	0.04	0	0	1	0	1	1	0	0	0.0133333	0.00666667	0.0233333	0.0133333	0.666667	0.333333
17929	17929	Myom1	2.49	2.71	1.86	0.24	0.23	0.3	4.95	5.41	3.67	0.48	0.47	0.61	245	267	183	23	25	29	2.35333	0.256667	4.67667	0.52	231.667	25.6667
13591	13591	Ebf1	5.86	5.83	6.24	12.51	12.79	12.91	11.66	11.64	12.3	25	25.75	25.96	529	527	561	1080	1124	1126	5.97667	12.7367	11.8667	25.57	539	1110
216792	216792	Iba57	1.66	1.15	1.58	1.3	1.65	1.23	3.3	2.3	3.11	2.6	3.32	2.48	108	79	103	80	110	82	1.46333	1.39333	2.90333	2.8	96.6667	90.6667
24015	24015	Abce1	83.04	76.97	77.9	92.07	92.27	95.33	165.13	153.62	153.73	184	185.78	191.75	5359	4971	5035	5698	5809	5972	79.3033	93.2233	157.493	187.177	5121.67	5826.33
15382	15382	Hnrnpa1	433.64	378	465.54	585.43	561.55	570.99	862.35	754.48	918.68	1169.92	1130.69	1148.49	12220	10649	13185	15874	15497	15640	425.727	572.657	845.17	1149.7	12018	15670.3
15425	15425	Hoxc6	13.68	16.53	12.56	7.67	7.3	5.67	27.21	32.99	24.78	15.34	14.7	11.4	917	945	768	328	372	323	14.2567	6.88	28.3267	13.8133	876.667	341
12549	12549	Arhgap31	17.63	16.2	17.36	23.32	22.87	23.56	35.06	32.33	34.26	46.59	46.06	47.38	2393	2202	2358	3032	3025	3103	17.0633	23.25	33.8833	46.6767	2317.67	3053.33
230279	230279	Tmem268	4.18	4.59	4.59	4.84	4.93	4.22	8.31	9.16	9.05	9.67	9.92	8.49	273	300	306	308	314	266	4.45333	4.66333	8.84	9.36	293	296
71375	71375	Foxn3	5.41	5.28	4.81	5.28	5.84	5.56	10.76	10.54	9.5	10.55	11.75	11.18	718.97	731	665.95	702	765	726	5.16667	5.56	10.2667	11.16	705.307	731
52440	52440	Tax1bp1	63.97	67.22	60.27	57.16	56.77	57.52	127.22	134.17	118.93	114.22	114.3	115.69	3508	3691	3307	3004	3039	3060	63.82	57.15	126.773	114.737	3502	3034.33
56198	56198	Heyl	0.04	0.04	0.19	0.07	0.03	0.04	0.08	0.08	0.38	0.13	0.05	0.08	3	3	15	5	2	3	0.09	0.0466667	0.18	0.0866667	7	3.33333
22026	22026	Nr2c2	8.09	8.63	7.43	7.72	7.35	7.97	16.09	17.23	14.66	15.43	14.81	16.03	923.53	1022.88	874.65	817.82	831.69	906.24	8.05	7.68	15.9933	15.4233	940.353	851.917
100009600	100009600	Zglp1	0.59	0.37	0.22	0.38	0.15	0.99	1.18	0.74	0.44	0.77	0.3	2	8	5	3	5	2	13	0.393333	0.506667	0.786667	1.02333	5.33333	6.66667
333564	333564	Fndc3c1	0.25	0.13	0.37	0.07	0.08	0.05	0.5	0.25	0.72	0.13	0.16	0.1	20	10	29	5	6	4	0.25	0.0666667	0.49	0.13	19.6667	5
243270	243270	Hcar1	0.02	0.02	0.05	0.04	0.02	0	0.04	0.04	0.11	0.08	0.04	0	1	1	3	2	1	0	0.03	0.02	0.0633333	0.04	1.66667	1
230379	230379	Acer2	0.89	1.29	0.84	0.5	0.31	0.48	1.76	2.57	1.66	0.99	0.63	0.96	48	53.01	37	20	14	20	1.00667	0.43	1.99667	0.86	46.0033	18
67726	67726	Fam114a2	15.45	18.07	17.34	16.72	17.93	16.12	30.72	36.07	34.22	33.42	36.1	32.43	655	768	739	680	741	664	16.9533	16.9233	33.67	33.9833	720.667	695
19332	19332	Rab20	5.96	5.5	5.46	3.82	3.75	3.4	11.84	10.98	10.78	7.63	7.55	6.84	128	117	118	79	79	71	5.64	3.65667	11.2	7.34	121	76.3333
69902	69902	Mrto4	51.06	43.99	54.83	73.99	70.18	69.8	101.54	87.8	108.19	147.87	141.31	140.39	880	756	951	1229	1188	1169	49.96	71.3233	99.1767	143.19	862.333	1195.33
69190	69190	Dym	20.25	20.03	18.37	20.97	22.05	22.97	40.28	39.97	36.25	41.9	44.39	46.2	814	807	741	811	865	892	19.55	21.9967	38.8333	44.1633	787.333	856
68980	68980	Wdr53	5.71	6.7	6.86	7.22	6.51	7.56	11.36	13.38	13.54	14.43	13.12	15.21	103	122	120	121	113	130	6.42333	7.09667	12.76	14.2533	115	121.333
330485	330485	Tmem145	0	0	0	0.03	0.02	0	0	0	0	0.06	0.04	0	0	0	0	1	1	0	0	0.0166667	0	0.0333333	0	0.666667
216131	216131	Trappc10	11.84	12.2	12.31	13.24	12.84	12.44	23.54	24.34	24.3	26.46	25.85	25.02	1074	1131	1166	1161	1144	1114.47	12.1167	12.84	24.06	25.7767	1123.67	1139.82
209601	209601	Erich3	0.01	0.03	0.03	0.03	0.03	0.03	0.02	0.06	0.06	0.07	0.07	0.07	1	4	1	1	4	2	0.0233333	0.03	0.0466667	0.07	2	2.33333
73830	73830	Eif3k	148.29	151.44	146	144.97	148.7	145.33	294.9	302.27	288.12	289.71	299.41	292.32	1569	1590	1557	1480	1551	1490	148.577	146.333	295.097	293.813	1572	1507
67655	67655	Ctdp1	16.47	13.59	15.79	23.44	24.72	25.45	32.76	27.13	31.16	46.84	49.78	51.18	1069	890	1025	1446	1543	1570	15.2833	24.5367	30.35	49.2667	994.667	1519.67
66526	66526	Tceanc2	12.42	10.79	10.22	8.21	9.13	9.46	24.69	21.54	20.17	16.42	18.38	19.03	441	403	384	256	310	312	11.1433	8.93333	22.1333	17.9433	409.333	292.667
319277	319277	Washc4	23.03	24.26	22.15	21.88	21.43	22.01	45.8	48.42	43.7	43.72	43.14	44.26	2342.18	2472.42	2246.02	2134.82	2123.21	2169.35	23.1467	21.7733	45.9733	43.7067	2353.54	2142.46
329659	329659	E130311K13Rik	3.02	3.65	2.59	3.25	3.64	3.42	6.01	7.28	5.1	6.5	7.33	6.87	75	91	65	78	89	83	3.08667	3.43667	6.13	6.9	77	83.3333
382620	382620	Tmed8	7.59	8.06	7.19	6.27	6.5	6.77	15.09	16.09	14.19	12.53	13.08	13.61	959.86	1020	911.82	759.9	799	832	7.61333	6.51333	15.1233	13.0733	963.893	796.967
257662	257662	Olfr1290	0	0.07	0.07	0	0	0	0	0.15	0.14	0	0	0	0	1	1	0	0	0	0.0466667	0	0.0966667	0	0.666667	0
228543	228543	Rhov	0.04	0.12	0.16	0.08	0.08	0	0.08	0.24	0.31	0.16	0.16	0	1	3	4	2	2	0	0.106667	0.0533333	0.21	0.106667	2.66667	1.33333
93880	93880	Pcdhb9	0.18	0.24	0.22	0.53	0.24	0.45	0.35	0.47	0.43	1.07	0.49	0.9	9	12	11	26	12	22	0.213333	0.406667	0.416667	0.82	10.6667	20
665113	665113	Tnik	2.74	2.62	3.02	1.66	1.78	1.88	5.45	5.24	5.97	3.32	3.58	3.77	346	330	382	207	222	231	2.79333	1.77333	5.55333	3.55667	352.667	220
100017	100017	Ldlrap1	12.23	11.73	14.13	7.32	7.36	7.04	24.32	23.41	27.88	14.64	14.83	14.17	586	570	698	330	349	338	12.6967	7.24	25.2033	14.5467	618	339
69097	69097	Trim15	0.24	0.28	0.22	0.15	0.36	0.26	0.49	0.56	0.43	0.29	0.72	0.53	7	8	6	4	10	7	0.246667	0.256667	0.493333	0.513333	7	7
15490	15490	Hsd17b7	20.03	19.62	22.75	17.89	17.22	17.46	39.82	39.15	44.89	35.75	34.67	35.11	1566	1531	1782	1333	1307	1319	20.8	17.5233	41.2867	35.1767	1626.33	1319.67
19416	19416	Rasd1	0.08	0.08	0.2	0.09	0.04	0.04	0.16	0.16	0.4	0.17	0.08	0.08	2	2	5	2	1	1	0.12	0.0566667	0.24	0.11	3	1.33333
18033	18033	Nfkb1	19.41	21.97	20.62	19.68	18.75	19.89	38.59	43.86	40.69	39.34	37.75	40	1364	1548	1457	1328	1283	1363	20.6667	19.44	41.0467	39.03	1456.33	1324.67
68943	68943	Pink1	12.67	15.08	12.69	8.23	8.09	8.14	25.2	30.1	25.04	16.46	16.29	16.38	484	576	486	302	302	302	13.48	8.15333	26.78	16.3767	515.333	302
100101919	100101919	Dnah7c	0	0.03	0.01	0.01	0	0.01	0	0.07	0.01	0.01	0.01	0.01	0	5	1	1	1	1	0.0133333	0.00666667	0.0266667	0.01	2	1
210104	210104	Zfp658	1.98	2.17	1.62	0.9	0.94	1.16	3.93	4.33	3.2	1.8	1.89	2.34	113	125	92	49	53	64	1.92333	1	3.82	2.01	110	55.3333
270028	270028	Fam155a	0.02	0.04	0.02	0	0	0	0.04	0.08	0.04	0	0	0	1	2	1	0	0	1	0.0266667	0	0.0533333	0	1.33333	0.333333
19112	19112	Prl8a6	0.06	0	0	0.27	0	0.13	0.13	0	0	0.53	0	0.27	1	0	0	4	0	2	0.02	0.133333	0.0433333	0.266667	0.333333	2
68276	68276	Toe1	9.39	10.14	9.59	11.53	12.94	12.85	18.66	20.24	18.93	23.04	26.06	25.85	299	322	306.68	353.33	402.57	397	9.70667	12.44	19.2767	24.9833	309.227	384.3
100037282	100037282	Rsph3b	5.81	7.6	7.02	3.73	5.35	4.77	11.55	15.18	13.85	7.46	10.78	9.6	142.23	185.89	172.57	87.93	128.37	113.54	6.81	4.61667	13.5267	9.28	166.897	109.947
22361	22361	Vnn1	0.72	1.02	0.92	0.16	0.24	0.26	1.43	2.04	1.81	0.32	0.47	0.53	28	40	36	6	9	10	0.886667	0.22	1.76	0.44	34.6667	8.33333
21933	21933	Tnfrsf10b	30.18	26.22	30.25	21.13	21.6	20.98	60.01	52.33	59.7	42.22	43.48	42.19	1598.99	1390	1606.04	1073.98	1116.96	1079	28.8833	21.2367	57.3467	42.63	1531.68	1089.98
14706	14706	Gng4	0.23	0.52	0.45	0.49	0.64	0.52	0.46	1.04	0.89	0.98	1.29	1.05	12	25	24	25	33	27	0.4	0.55	0.796667	1.10667	20.3333	28.3333
226304	226304	Npbwr1	0	0.02	0.03	0.02	0	0	0	0.03	0.06	0.03	0	0	0	1	2	1	0	0	0.0166667	0.00666667	0.03	0.01	1	0.333333
15421	15421	Hoxc12	0.32	0.32	0.24	0.49	0.4	0.57	0.63	0.64	0.47	0.98	0.81	1.15	4	4	3	6	5	7	0.293333	0.486667	0.58	0.98	3.66667	6
26554	26554	Cul3	39.86	36.4	37.52	38.73	42.7	42.92	79.26	72.66	74.05	77.4	85.98	86.33	2785	2536	2691	2657	2926	2947	37.9267	41.45	75.3233	83.2367	2670.67	2843.33
77117	77117	Zfp934	1	1.62	1.52	1.54	1.75	1.8	1.99	3.23	3	3.08	3.52	3.61	36.34	57.21	54.18	52.05	60.24	61.09	1.38	1.69667	2.74	3.40333	49.2433	57.7933
12817	12817	Col13a1	0	0	0	0	0	0.02	0	0	0	0	0	0.04	0	0	0	0	0	1	0	0.00666667	0	0.0133333	0	0.333333
329972	329972	Spata21	0.02	0	0	0.03	0.03	0	0.05	0	0	0.05	0.05	0	1	0	0	1	1	0	0.00666667	0.02	0.0166667	0.0333333	0.333333	0.666667
18577	18577	Pde4a	8.19	6.92	8.21	10.17	10.04	10.05	16.28	13.81	16.21	20.32	20.21	20.22	583	502	617	731	691	699	7.77333	10.0867	15.4333	20.25	567.333	707
16985	16985	Lsp1	22.89	34.38	21.53	24.83	26.34	26.44	45.52	68.62	42.48	49.62	53.04	53.19	720	1064	687	792	821	826	26.2667	25.87	52.2067	51.95	823.667	813
76299	76299	Erp44	16.25	16.97	15.91	14.54	14.2	15.21	32.32	33.86	31.4	29.07	28.59	30.59	1479	1545	1449	1268	1259	1343	16.3767	14.65	32.5267	29.4167	1491	1290
20768	20768	Sephs2	25.31	21.93	26.78	22.94	25.54	23.37	50.33	43.76	52.85	45.85	51.42	47.01	881	763	935	767	869	790	24.6733	23.95	48.98	48.0933	859.667	808.667
69296	69296	Tmigd3	0.01	0.16	0.15	0.08	0.08	0.08	0.02	0.32	0.3	0.17	0.16	0.17	0.24	2	3	1	1	1	0.106667	0.08	0.213333	0.166667	1.74667	1
108797	108797	Mex3b	6.11	7.57	5.49	10.52	10.14	10.16	12.15	15.11	10.83	21.01	20.42	20.43	350	434	315	578	567	565	6.39	10.2733	12.6967	20.62	366.333	570
264134	264134	Ttc26	1.78	2.44	1.79	1.44	1.57	1.68	3.55	4.86	3.53	2.87	3.16	3.38	126	173	127	97	108	116	2.00333	1.56333	3.98	3.13667	142	107
74556	74556	Themis3	0	0.02	0	0.03	0	0	0	0.05	0	0.05	0	0	0	1	0	1	0	0	0.00666667	0.01	0.0166667	0.0166667	0.333333	0.333333
71382	71382	Pex1	2.88	3.25	3.24	3.62	2.78	2.85	5.73	6.48	6.4	7.23	5.59	5.73	210.61	239.19	241.83	251.09	202.18	200.26	3.12333	3.08333	6.20333	6.18333	230.543	217.843
20339	20339	Sele	0.15	0.15	0.37	0.33	0.19	0.19	0.29	0.29	0.74	0.65	0.39	0.39	10	10	20	18	12	13	0.223333	0.236667	0.44	0.476667	13.3333	14.3333
76415	76415	Fam187b	0	0	0.05	0	0	0	0	0	0.09	0	0	0	0	0	1	0	0	0	0.0166667	0	0.03	0	0.333333	0
15193	15193	Hdgfl2	30.5	31.39	31.28	39.57	37.96	39.01	60.65	62.65	61.73	79.07	76.43	78.45	1147	1172	1175	1425	1391	1413	31.0567	38.8467	61.6767	77.9833	1164.67	1409.67
66240	66240	Kcne1l	0	0.05	0.09	0.05	0	0	0	0.09	0.18	0.1	0	0	0	1	2	1	0	0	0.0466667	0.0166667	0.09	0.0333333	1	0.333333
73914	73914	Irak3	2.38	4.01	3.55	3.85	4.11	4.01	4.74	8	7	7.69	8.27	8.06	120	202	179	186	202	196	3.31333	3.99	6.58	8.00667	167	194.667
77116	77116	Mtmr2	30.46	28.84	31.11	32.64	33.13	34.05	60.58	57.56	61.39	65.23	66.7	68.49	1640	1545	1686	1683	1735	1785	30.1367	33.2733	59.8433	66.8067	1623.67	1734.33
65246	65246	Xpo7	14.3	14.18	14.99	17.4	16.96	17.36	28.44	28.31	29.57	34.78	34.14	34.93	1345	1318	1404	1569	1545	1578	14.49	17.24	28.7733	34.6167	1355.67	1564
207686	207686	Cfap69	1.91	1.54	1.66	3.6	3.49	3.69	3.8	3.08	3.28	7.2	7.02	7.41	114	95	101	215	219	222	1.70333	3.59333	3.38667	7.21	103.333	218.667
21425	21425	Tfeb	1.52	1.28	1.46	1.11	0.95	0.8	3.02	2.55	2.88	2.23	1.92	1.6	57	48	55	36	35	29	1.42	0.953333	2.81667	1.91667	53.3333	33.3333
53310	53310	Dlg3	10.84	13.46	12.83	10.46	10.52	10.79	21.55	26.88	25.33	20.91	21.18	21.71	668	809	792	601	612	626	12.3767	10.59	24.5867	21.2667	756.333	613
53761	53761	Prrc2a	71.01	66.13	70.25	77.72	74.89	76.68	141.21	131.99	138.62	155.32	150.79	154.24	8538	7962	8452	8954	8777	8948	69.13	76.43	137.273	153.45	8317.33	8893
218885	218885	Oxnad1	6.65	8.49	7.54	9.22	8.71	8.68	13.22	16.95	14.89	18.42	17.54	17.45	217	277	247	289	278	275	7.56	8.87	15.02	17.8033	247	280.667
19363	19363	Rad51b	0.62	0.84	0.75	1.56	1.79	1.75	1.24	1.67	1.47	3.11	3.6	3.51	16	21	19	39	45	43	0.736667	1.7	1.46	3.40667	18.6667	42.3333
245666	245666	Iqsec2	3.4	3.98	3.14	2.86	2.65	2.42	6.77	7.94	6.2	5.72	5.34	4.88	344	396	320.06	275	265	235.99	3.50667	2.64333	6.97	5.31333	353.353	258.663
20416	20416	Shc1	68.83	66.19	67.65	60.66	60.04	60.7	136.89	132.11	133.5	121.22	120.89	122.09	3871	3715	3808	3179	3198	3216	67.5567	60.4667	134.167	121.4	3798	3197.67
107351	107351	Kank1	10.14	10.22	10.45	8.43	7.85	8.16	20.17	20.4	20.62	16.84	15.8	16.4	903	913	935	677	676	707	10.27	8.14667	20.3967	16.3467	917	686.667
328099	328099	Prps1l3	12.54	11.79	13.05	13.84	13.21	13.63	24.93	23.52	25.74	27.66	26.59	27.41	853.28	802.72	889	903.23	876.74	900	12.46	13.56	24.73	27.22	848.333	893.323
232337	232337	Zfp637	17.56	17.22	18.32	16.12	14.73	16.05	34.92	34.36	36.15	32.22	29.66	32.29	293	287	305	260	241	259	17.7	15.6333	35.1433	31.39	295	253.333
381994	381994	E030018B13Rik	0	0	0	0.15	0	0	0	0	0	0.31	0	0	0	0	0	2	0	0	0	0.05	0	0.103333	0	0.666667
52392	52392	D1Ertd622e	8.41	9.05	10.33	6.62	6.28	7.48	16.73	18.06	20.38	13.23	12.64	15.04	393	428	484	296	283	337	9.26333	6.79333	18.39	13.6367	435	305.333
18970	18970	Polb	16.52	17.11	15.76	22.89	19.11	21.83	32.85	34.15	31.11	45.74	38.48	43.9	349.04	339.66	344.24	454.13	374.39	429.14	16.4633	21.2767	32.7033	42.7067	344.313	419.22
654465	654465	Defb47	0	0	0	0.07	0	0.07	0	0	0	0.14	0	0.14	0	0	0	1	0	1	0	0.0466667	0	0.0933333	0	0.666667
100862072	100862072	Gm21451	31.68	34.7	28.74	21.19	16.69	20.65	63	69.26	56.72	42.34	33.6	41.53	1318.02	1431.92	1177.16	836.54	672.68	824.58	31.7067	19.51	62.9933	39.1567	1309.03	777.933
237178	237178	Ppef1	1.09	1.02	0.79	0.26	0.15	0.31	2.17	2.03	1.56	0.52	0.31	0.62	50	50	35	11	7	13	0.966667	0.24	1.92	0.483333	45	10.3333
29809	29809	Rabgap1l	5.5	5.43	5.6	5.38	5.2	4.94	10.94	10.83	11.05	10.75	10.47	9.93	442.21	475	443	463	473	439	5.51	5.17333	10.94	10.3833	453.403	458.333
12053	12053	Bcl6	5.34	6.15	5.12	4.79	3.84	4.23	10.61	12.27	10.1	9.58	7.73	8.5	334	390	330	285	238	255	5.53667	4.28667	10.9933	8.60333	351.333	259.333
320982	320982	Arl4c	17.83	17.09	19.77	31.89	32.41	31.71	35.47	34.12	39.01	63.72	65.26	63.79	1201	1152	1333	2059	2129	2073	18.23	32.0033	36.2	64.2567	1228.67	2087
217011	217011	Nle1	10.39	9.03	9.63	13.88	14.35	13.51	20.66	18.02	19.01	27.73	28.9	27.17	271	242	252	355	374	352	9.68333	13.9133	19.23	27.9333	255	360.333
320662	320662	Casc1	0.09	0.18	0.25	0.27	0.21	0.37	0.19	0.35	0.49	0.55	0.42	0.75	7	11	13	15	15	22	0.173333	0.283333	0.343333	0.573333	10.3333	17.3333
71779	71779	2024-03-08	16.55	18.13	16.28	13.58	13.02	13.52	32.92	36.19	32.12	27.14	26.21	27.2	1294	1411	1262	1020	990	1013	16.9867	13.3733	33.7433	26.85	1322.33	1007.67
66158	66158	Rtl8a	21.65	22.37	24.2	20.15	18.68	16.46	43.05	44.65	47.75	40.26	37.62	33.11	396.65	408.93	446.06	355.68	336.06	293.07	22.74	18.43	45.15	36.9967	417.213	328.27
69655	69655	Cd164l2	0.08	0	0.08	0	0	0.08	0.15	0	0.15	0	0	0.16	1	0	1	0	0	1	0.0533333	0.0266667	0.1	0.0533333	0.666667	0.333333
23957	23957	Nr0b2	0.05	0.05	0	0	0.06	0	0.11	0.11	0	0	0.11	0	1	1	0	0	1	0	0.0333333	0.02	0.0733333	0.0366667	0.666667	0.333333
26429	26429	Orc5	7.2	7.95	7.57	7.41	7.22	8.08	14.32	15.86	14.94	14.81	14.54	16.24	236	260	249	232	231	256	7.57333	7.57	15.04	15.1967	248.333	239.667
59288	59288	Dctn5	39.93	39.52	38.1	39.92	42.44	38.24	79.42	78.87	75.19	79.79	85.46	76.92	918	907	880	883	956	854	39.1833	40.2	77.8267	80.7233	901.667	897.667
19732	19732	Rgl2	14.83	15.57	15.03	14.8	15.43	12.6	29.49	31.07	29.66	29.58	31.06	25.35	724	761	737	693	737	597	15.1433	14.2767	30.0733	28.6633	740.667	675.667
237339	237339	L3mbtl3	6.82	7.69	6.42	3.33	3.61	3.32	13.57	15.34	12.66	6.66	7.26	6.68	538	605	503	250	274	253	6.97667	3.42	13.8567	6.86667	548.667	259
381853	381853	Gipr	0.01	0.06	0	0.14	0.02	0.06	0.03	0.12	0	0.28	0.04	0.12	1	2	0	7	1	4	0.0233333	0.0733333	0.05	0.146667	1	4
78926	78926	Gas2l1	26.63	24.15	27.21	19.47	19.43	18.81	52.96	48.21	53.7	38.9	39.12	37.84	1200	1093	1222	847	847	815	25.9967	19.2367	51.6233	38.62	1171.67	836.333
102635315	102635315	Gm32687	1.94	2.22	1.9	2.73	3.39	3.6	3.86	4.44	3.75	5.46	6.82	7.23	92.68	102.16	88.33	119.61	145.02	163.71	2.02	3.24	4.01667	6.50333	94.39	142.78
329244	329244	Il19	0.1	0	0	0	0	0	0.19	0	0	0	0	0	1	0	0	0	0	0	0.0333333	0	0.0633333	0	0.333333	0
24061	24061	Smc1a	31.97	31.24	33.15	43.59	45.92	46.19	63.58	62.36	65.41	87.12	92.46	92.91	2123	2092	2216	2807	2988	2983	32.12	45.2333	63.7833	90.83	2143.67	2926
72309	72309	Tmem158	2.14	1.43	1.64	3.08	3.07	2.74	4.25	2.85	3.25	6.16	6.17	5.52	57	38	44	79	80	71	1.73667	2.96333	3.45	5.95	46.3333	76.6667
71753	71753	Tmprss6	0	0	0.02	0	0.04	0	0	0	0.04	0	0.08	0	0	0	1	0	2	0	0.00666667	0.0133333	0.0133333	0.0266667	0.333333	0.666667
381310	381310	Stum	0	0	0.01	0	0	0	0	0	0.02	0	0	0	0	0	1	0	0	0	0.00333333	0	0.00666667	0	0.333333	0
68628	68628	Fbxw9	9.67	12.3	11.34	8.57	8.92	8.12	19.23	24.54	22.37	17.13	17.95	16.34	277	352	326	236	250	226	11.1033	8.53667	22.0467	17.14	318.333	237.333
71361	71361	Aifm2	7.95	7.43	6.6	6.66	7.01	6.95	15.81	14.83	13.02	13.31	14.11	13.99	322.17	308.03	319	234.12	254.14	255.12	7.32667	6.87333	14.5533	13.8033	316.4	247.793
83558	83558	Tex11	0.04	0.02	0.04	0.02	0.04	0.04	0.07	0.05	0.07	0.05	0.08	0.08	2	1	2	1	2	2	0.0333333	0.0333333	0.0633333	0.07	1.66667	1.66667
67619	67619	Nob1	30.66	29.18	29.02	35.94	34.89	34.15	60.97	58.24	57.27	71.83	70.25	68.69	769	731	731	867	857	832	29.62	34.9933	58.8267	70.2567	743.667	852
98388	98388	Chst10	0.81	1.08	0.7	0.8	0.89	0.71	1.61	2.16	1.38	1.59	1.8	1.44	42	56	36	40	46	36	0.863333	0.8	1.71667	1.61	44.6667	40.6667
241230	241230	St8sia6	0.02	0.02	0.02	0	0.04	0.01	0.04	0.04	0.04	0	0.08	0.01	1	2	3	0	2	1	0.02	0.0166667	0.04	0.03	2	1
235044	235044	Plppr2	7.32	7.17	6.6	6.24	5.62	6.45	14.56	14.31	13.02	12.46	11.32	12.98	335	340	308	277	254	296	7.03	6.10333	13.9633	12.2533	327.667	275.667
67873	67873	Mri1	9.8	9.94	9.48	9.89	10.41	9.34	19.49	19.84	18.7	19.77	20.97	18.8	335.43	340.01	325.35	325.2	348.47	310.56	9.74	9.88	19.3433	19.8467	333.597	328.077
67457	67457	Frmd8	38.01	35.16	39.05	24.65	24.56	23.24	75.59	70.19	77.05	49.25	49.45	46.74	1927	1786	1972	1188	1207	1144	37.4067	24.15	74.2767	48.48	1895	1179.67
76507	76507	Aoc1	0.02	0	0	0	0	0	0.05	0	0	0	0	0	1	0	0	0	0	0	0.00666667	0	0.0166667	0	0.333333	0
230753	230753	Thrap3	77.48	79.99	78.89	95.38	96.05	97.04	154.08	159.65	155.68	190.6	193.4	195.18	5799	6003	5910	6857	7031	7065	78.7867	96.1567	156.47	193.06	5904	6984.33
399591	399591	Tmsb15l	2.3	3.14	1.9	1.56	1.25	1.85	4.58	6.26	3.75	3.12	2.53	3.72	23.12	31.29	19.29	15.18	12.45	18.04	2.44667	1.55333	4.86333	3.12333	24.5667	15.2233
218294	218294	Cdc14b	5.82	5.46	6.11	6.41	7.18	6.24	11.57	10.89	12.06	12.82	14.47	12.55	533.99	512	556	560	638	569.95	5.79667	6.61	11.5067	13.28	533.997	589.317
223272	223272	Itgbl1	25.73	33.16	22.26	13.78	14.67	14.1	51.18	66.18	43.92	27.54	29.55	28.36	1134.07	1461.16	961.48	579.29	632.65	601.9	27.05	14.1833	53.76	28.4833	1185.57	604.613
56323	56323	Dnajb5	7.7	8.93	7.91	7.76	6.13	7.35	15.31	17.82	15.61	15.5	12.34	14.79	411	476	421	393	318	377	8.18	7.08	16.2467	14.21	436	362.667
239133	239133	Dleu7	0.05	0.16	0	0	0.05	0	0.1	0.31	0	0	0.11	0	1	3	0	0	1	0	0.07	0.0166667	0.136667	0.0366667	1.33333	0.333333
67455	67455	Klhl13	8.06	8.75	7.45	3.16	3.27	3.97	16.02	17.47	14.7	6.32	6.58	7.98	431	465	396	160	169	201	8.08667	3.46667	16.0633	6.96	430.667	176.667
15932	15932	Idua	6.83	8.3	6.64	5.59	5.44	5.5	13.58	16.56	13.1	11.16	10.96	11.06	382	457	365	285	279	300	7.25667	5.51	14.4133	11.06	401.333	288
76954	76954	St5	14.97	19.12	15.52	15.45	15.29	14.24	29.76	38.17	30.63	30.88	30.78	28.65	1109	1409	1139	1071	1070	1002	16.5367	14.9933	32.8533	30.1033	1219	1047.67
11964	11964	Atp6v1a	87.13	82.76	85.97	55.72	56.33	56.78	173.28	165.19	169.65	111.35	113.43	114.2	6221	5913	6146	3814	3919	3935	85.2867	56.2767	169.373	112.993	6093.33	3889.33
243621	243621	Iqsec3	0	0	0.02	0.01	0.01	0	0	0	0.03	0.02	0.02	0	0	0	2	2	1	0	0.00666667	0.00666667	0.01	0.0133333	0.666667	1
30935	30935	Tor3a	7.97	11.82	7.68	6.7	6.7	7	15.84	23.6	15.15	13.39	13.49	14.08	435	646	420	351	357	371	9.15667	6.8	18.1967	13.6533	500.333	359.667
115489096	115489096	LOC115489096	3.18	3.14	4.56	3.91	3.2	3.73	6.33	6.27	9	7.81	6.45	7.5	88.67	87.43	127.58	104.63	87.3	100.91	3.62667	3.61333	7.2	7.25333	101.227	97.6133
192663	192663	Abcg4	0.11	0.05	0.13	0.03	0.07	0.03	0.22	0.1	0.26	0.05	0.14	0.07	8	3	9	2	4	2	0.0966667	0.0433333	0.193333	0.0866667	6.66667	2.66667
213773	213773	Tbl3	22.55	20.69	23.25	26.14	27.56	25.94	44.84	41.29	45.87	52.23	55.49	52.18	922	846	953	1026	1101	1030	22.1633	26.5467	44	53.3	907	1052.33
17533	17533	Mrc1	9.11	14.38	16.65	0.05	0.04	0.03	18.12	28.71	32.85	0.09	0.09	0.07	838	1324	1532	4	4	3	13.38	0.04	26.56	0.0833333	1231.33	3.66667
77462	77462	Tmem116	0.2	0.29	0.16	0	0.2	0.11	0.39	0.58	0.32	0	0.4	0.23	3	6	3	0	3	2	0.216667	0.103333	0.43	0.21	4	1.66667
21843	21843	Tial1	23.01	21.26	21.95	31.27	29.3	31.94	45.76	42.43	43.32	62.49	59	64.24	1106	1070	1049	1322	1249	1361	22.0733	30.8367	43.8367	61.91	1075	1310.67
102631909	102631909	Gm30124	0.76	0.53	0.86	0.76	0.48	0.67	1.5	1.06	1.69	1.53	0.96	1.35	29.39	20.68	33.41	28.54	18.22	25.45	0.716667	0.636667	1.41667	1.28	27.8267	24.07
68528	68528	Smim6	0	0.08	0.23	0.16	0.16	0.08	0	0.16	0.46	0.32	0.32	0.16	0	1	3	2	2	1	0.103333	0.133333	0.206667	0.266667	1.33333	1.66667
140477	140477	Dmbx1	0	0	0	0.02	0	0.02	0	0	0	0.03	0	0.03	0	0	0	1	0	1	0	0.0133333	0	0.02	0	0.666667
22142	22142	Tuba1a	554.05	540.73	575.31	664.74	662.47	636.76	1101.8	1079.28	1135.28	1328.41	1333.88	1280.78	13331.5	12993.4	13904.5	15385.4	15614.7	14883.4	556.697	654.657	1105.45	1314.36	13409.8	15294.5
21804	21804	Tgfb1i1	83.72	75.95	83.45	105.1	104.25	103.24	166.49	151.58	164.68	210.03	209.91	207.65	2930	2696	2938	3609	3621	3574	81.04	104.197	160.917	209.197	2854.67	3601.33
[truncated: 15,093 more rows]
