# Supplementary figures and images for: Disruption of the novel nested gene Aff3ir mediates disturbed flow-induced atherosclerosis in mice
Source: eLife journal article supplement (doi:10.7554/elife.103413), 2024-12-13

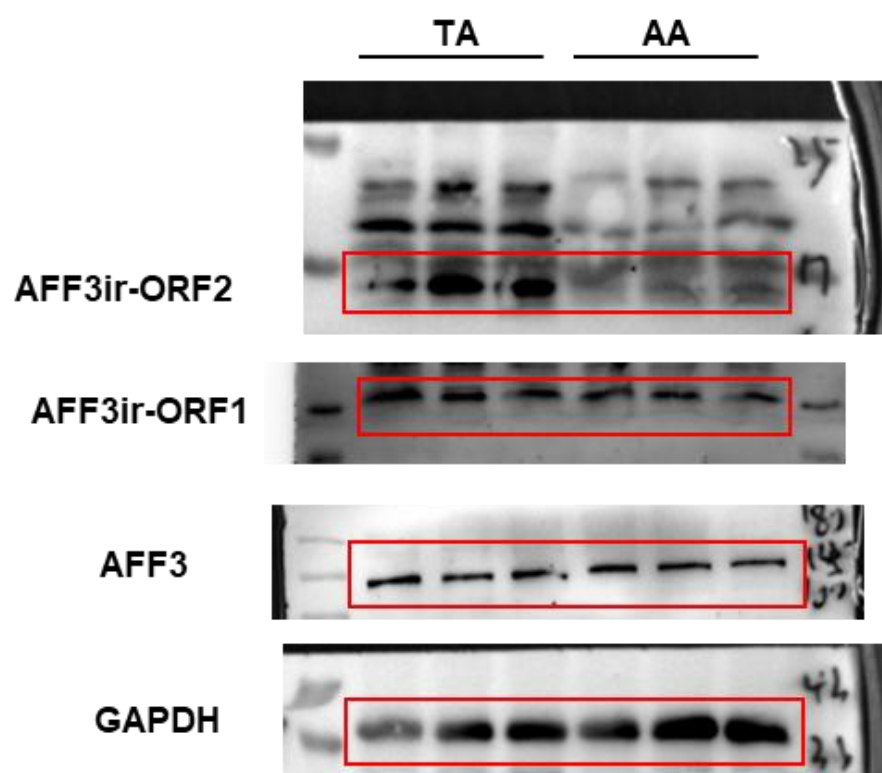

Supplement: fig1-data3 [file elife-103413-fig1-data3-v1.zip]

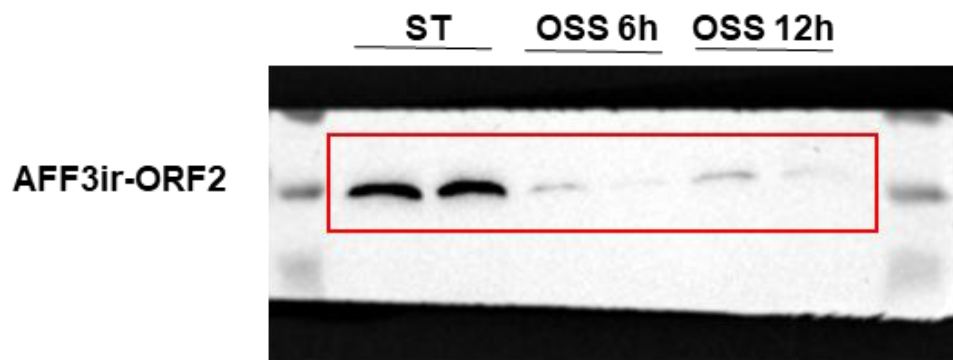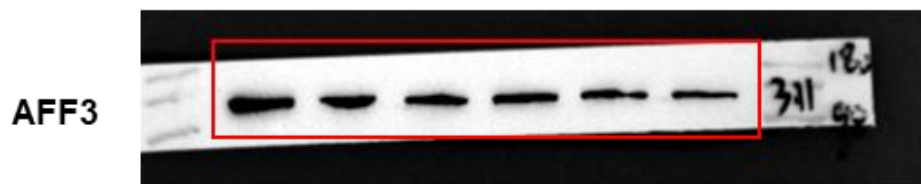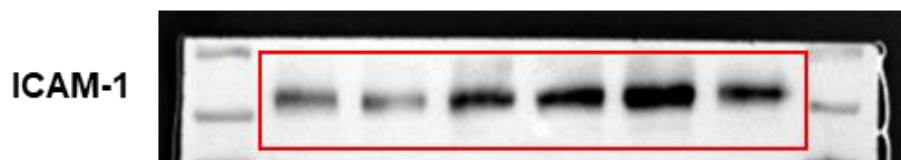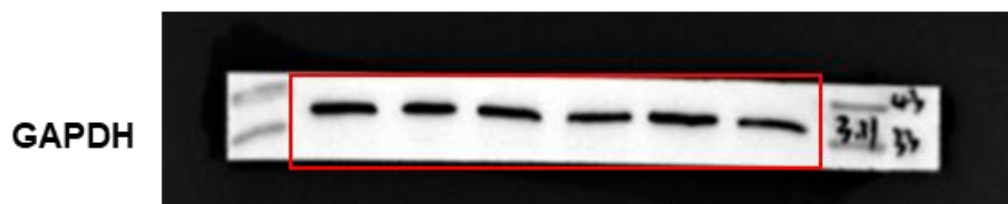

Supplement: fig1-data5 [file elife-103413-fig1-data5-v1.zip]

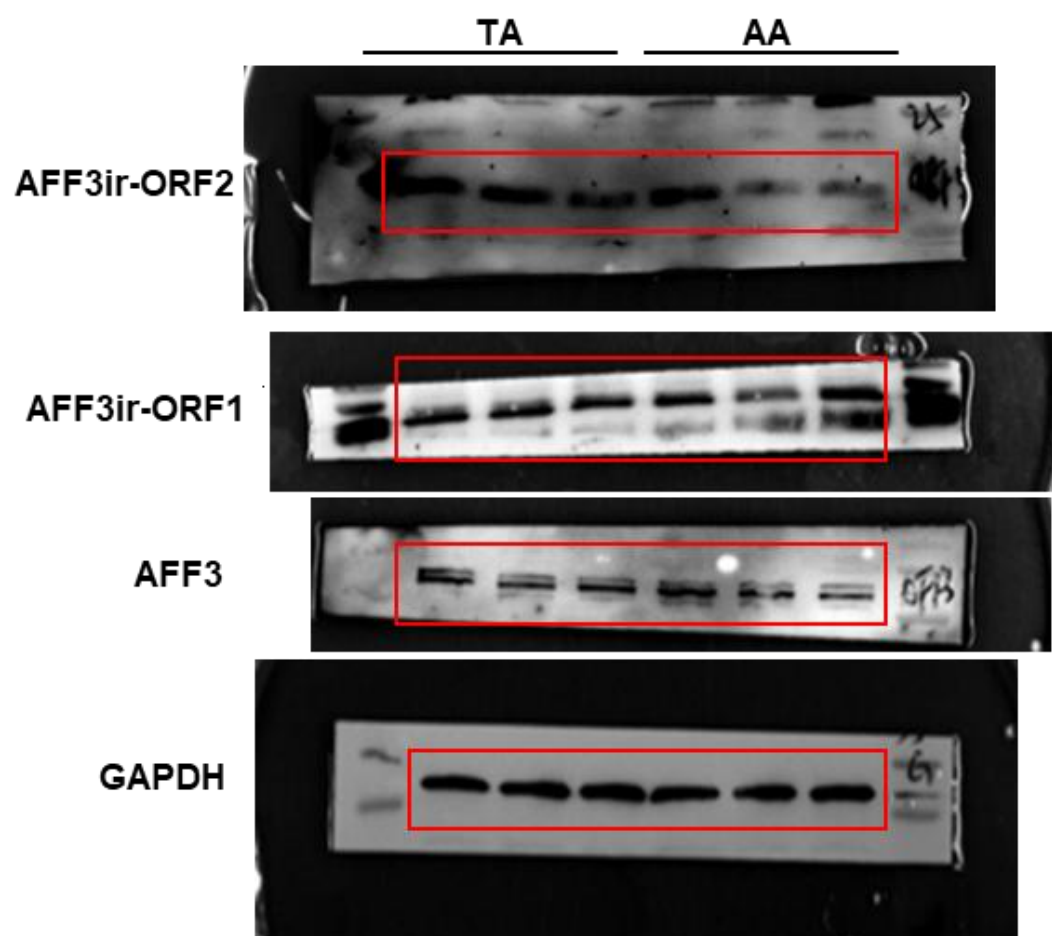

Supplement: fig1-figsupp1-data3 [file elife-103413-fig1-figsupp1-data3-v1.zip]

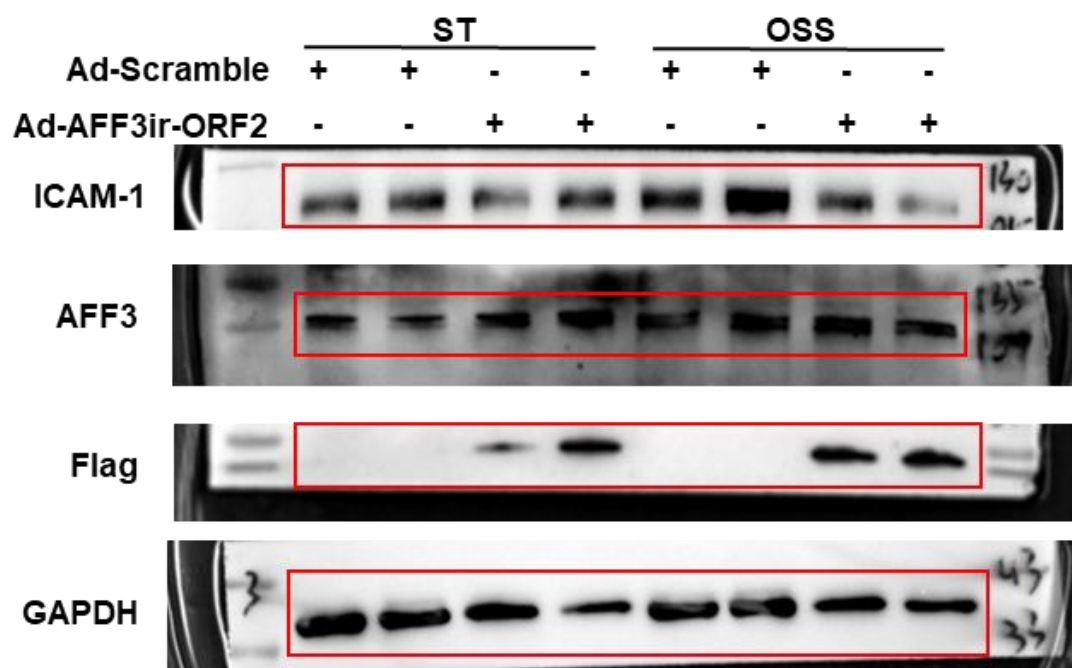

Supplement: fig2-data3 [file elife-103413-fig2-data3-v1.zip]

|                | ST |   |   |   | OSS |   |   |   |
|----------------|----|---|---|---|-----|---|---|---|
| Ad-Scramble    | +  | + | - | - | +   | + | - | - |
| Ad-AFF3ir-ORF2 | -  | - | + | + | -   | - | + | + |

ICAM-1

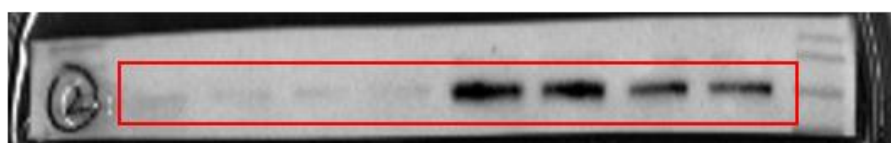

AFF3

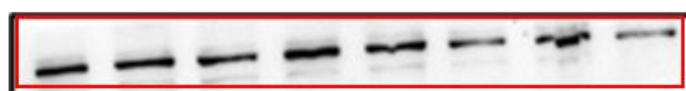

Flag

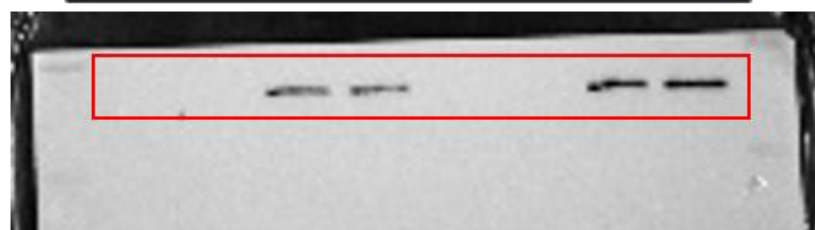

GAPDH

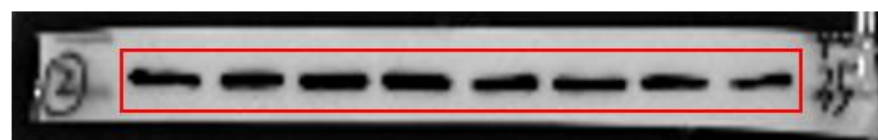

Supplement: fig2-data5 [file elife-103413-fig2-data5-v1.zip]

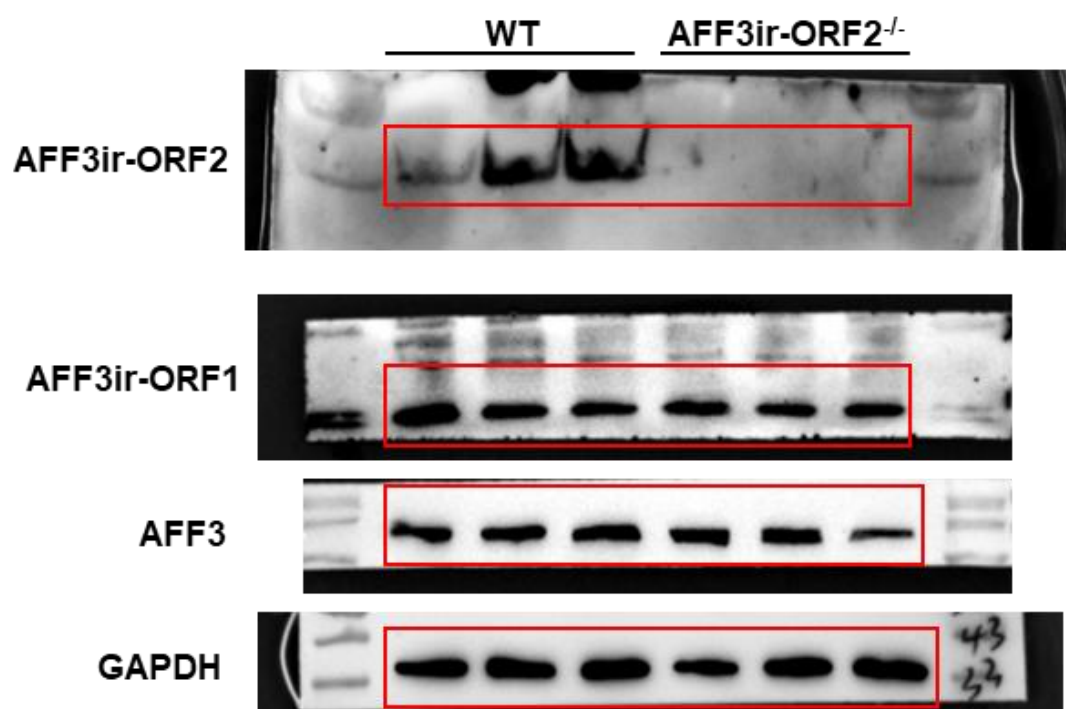

Supplement: fig3-figsupp1-data3 [file elife-103413-fig3-figsupp1-data3-v1.zip]

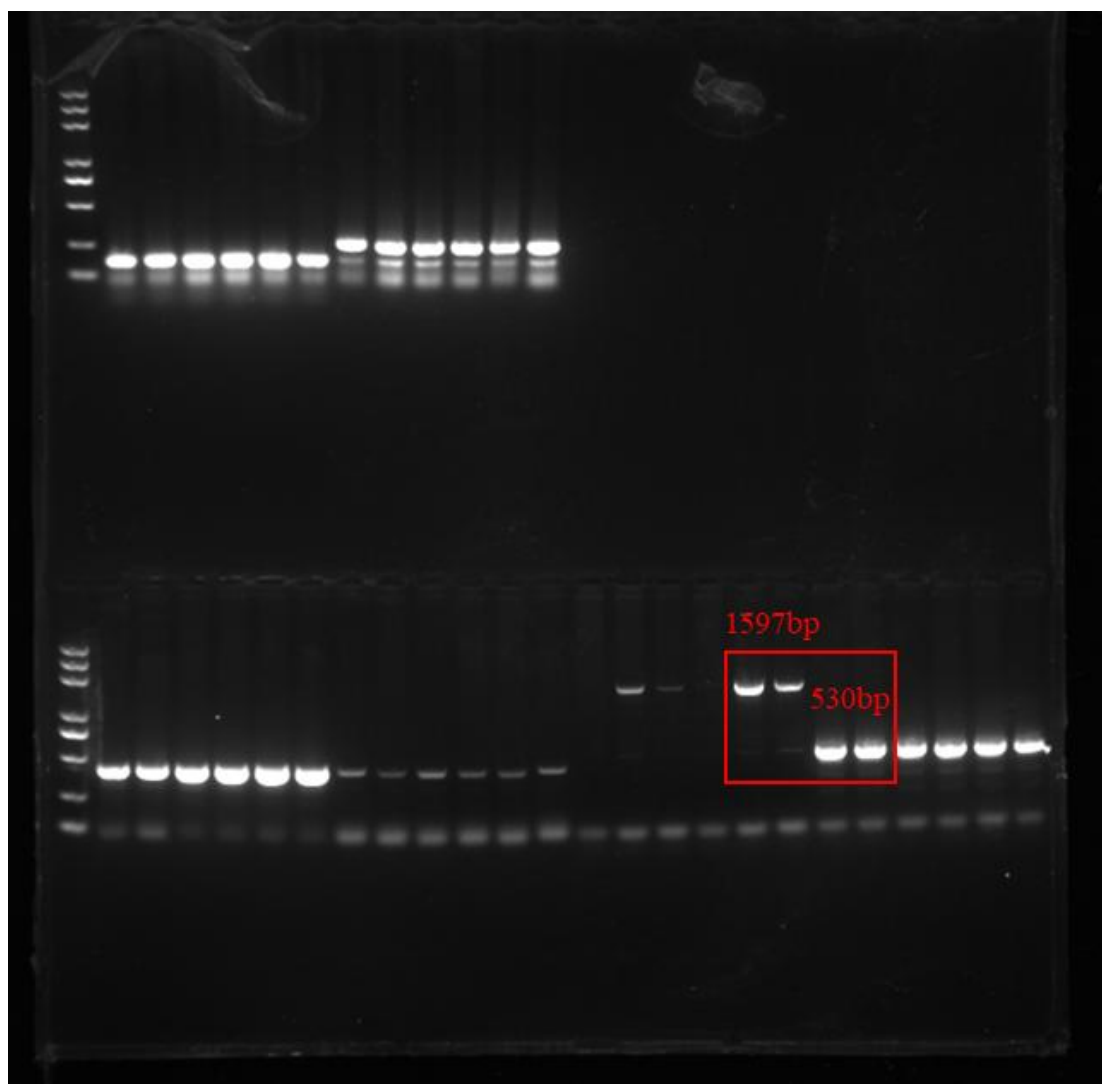

Supplement: fig3-figsupp1-data5 [file elife-103413-fig3-figsupp1-data5-v1.zip]

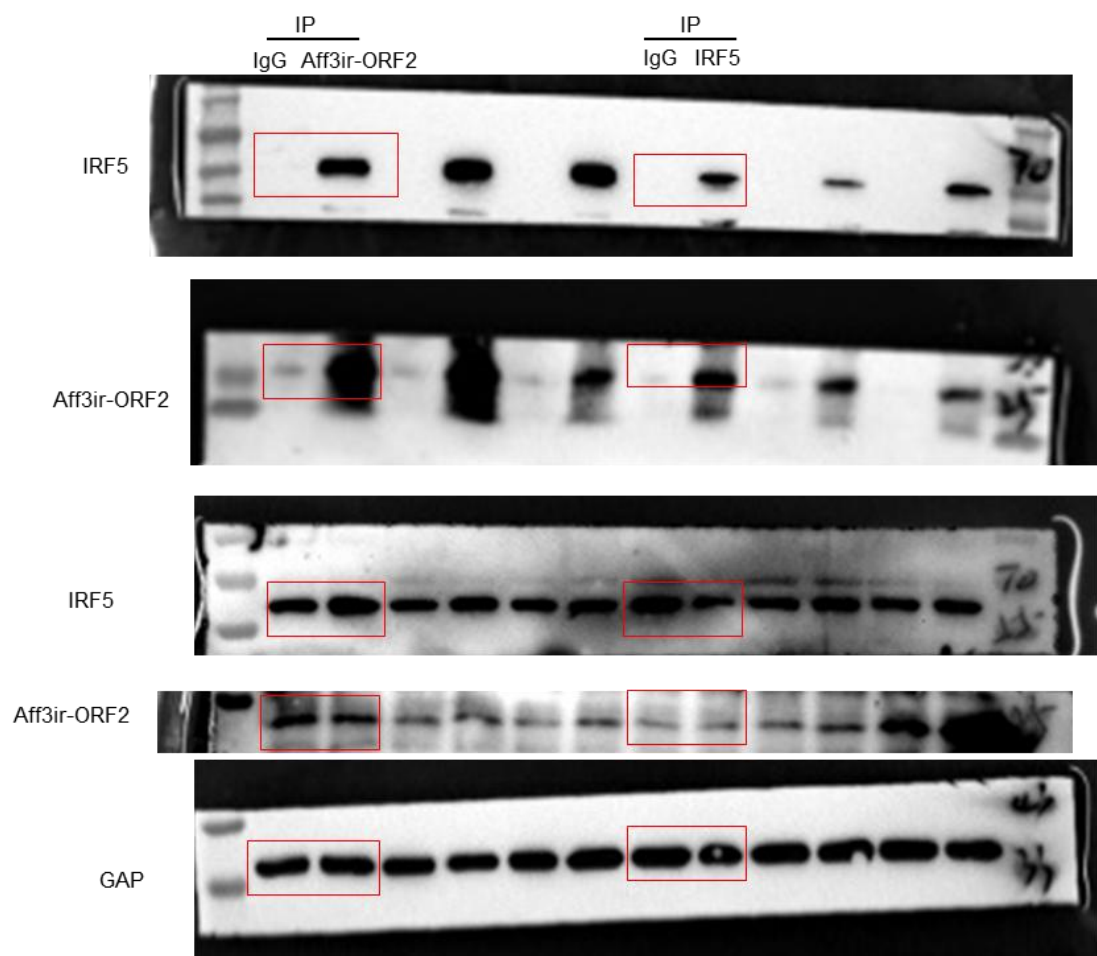

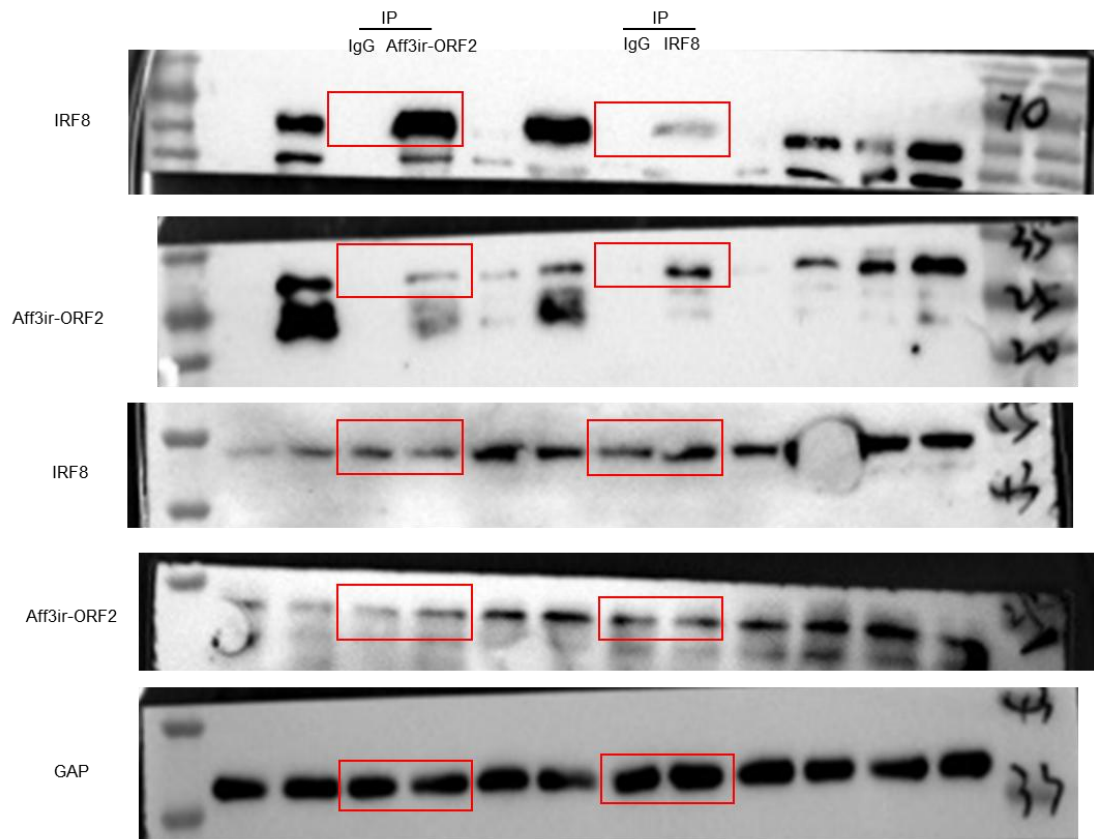

Supplement: fig4-data3 [file elife-103413-fig4-data3-v1.zip]

|                     | ST |   |   |   | OSS |   |   |   |
|---------------------|----|---|---|---|-----|---|---|---|
| ORF2 <sup>-/-</sup> | -  | + | - | + | -   | + | - | + |
| siNC                | +  | + | - | - | +   | + | - | - |
| siIRF5              | -  | - | + | + | -   | - | + | + |

ICAM-1

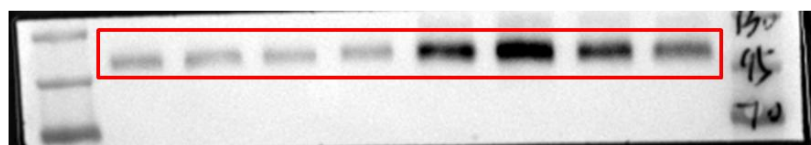

IRF5

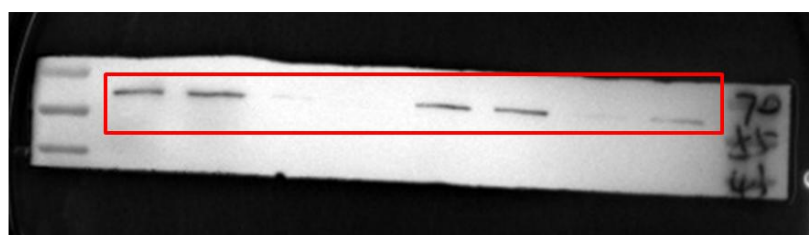

GAP

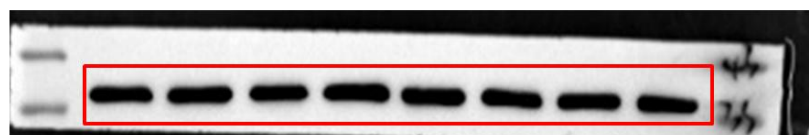

Supplement: fig4-data5 [file elife-103413-fig4-data5-v1.zip]

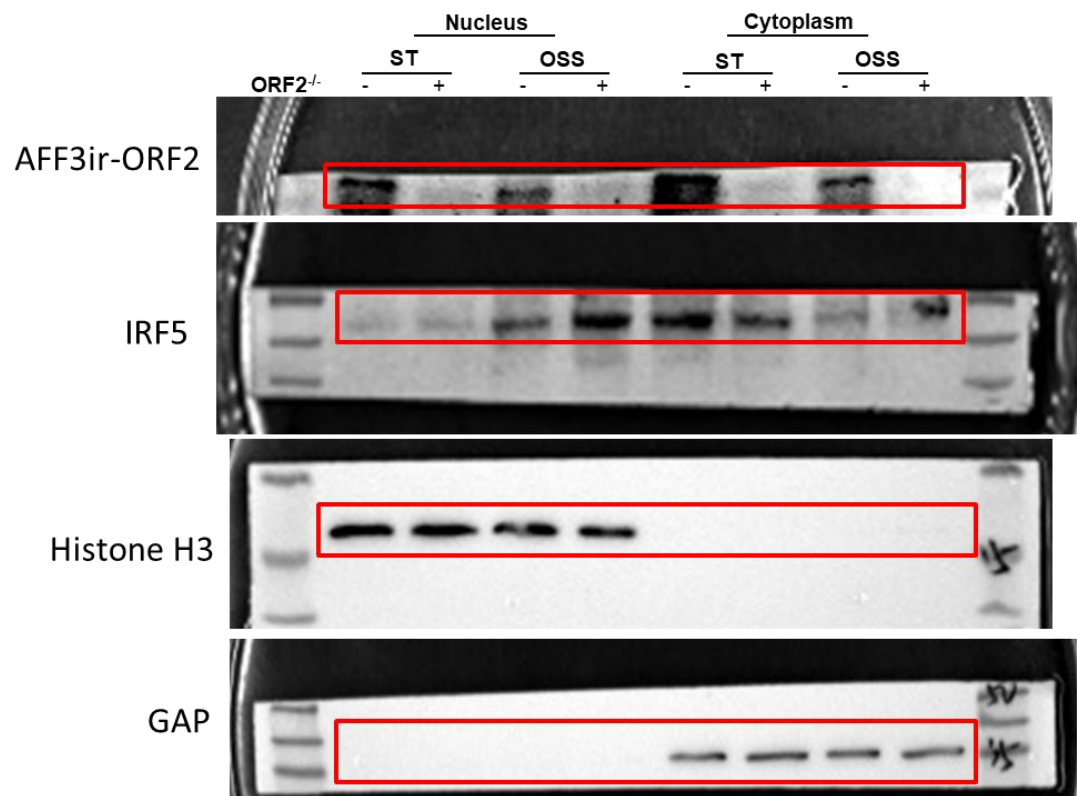

Supplement: fig4-data7 [file elife-103413-fig4-data7-v1.zip]
